# Supplementary material
Source: PubMed Central journal article supplement (PMC2933939)

## A third generation of Sansalvamide A derivatives: Design and synthesis of Hsp90 Inhibitors

Robert P. Sellers, Leslie D. Alexander, Victoria A. Johnson, Chun-Chieh Lin, Jeremiah Savage, Ricardo Corral, Jason Moss, Tim. S. Slugocki, Erinpriti K. Singh, Melinda R. Davis, Suchitra Ravula, Jamie E. Spicer, Jenna L. Oelrich, Andrea Thornquist, Chung-Mao Pan, and Shelli R. McAlpine\*

Department of Chemistry and Biochemistry, 5500 Campanile Road, San Diego State University, San Diego, CA 92182-1030.

|                                                                                                                          |     |
|--------------------------------------------------------------------------------------------------------------------------|-----|
| Compound 3 LCMS Double Deprotected Linear Pentapeptide HO-D-Phe-Leu-Leu-Val- <i>N</i> -Me-Leu-NH                         | S6  |
| Compound 3 NMR Cyclized Pentapeptide D-Phe-D-Leu-Val-Leu- <i>N</i> -Me-Leu                                               | S7  |
| Compound 3 LCMS Cyclized Pentapeptide D-Phe-D-Leu-Val-Leu- <i>N</i> -Me-Leu                                              | S8  |
| Compound 3 HPLC Cyclized Pentapeptide D-Phe-D-Leu-Val-Leu- <i>N</i> -Me-Leu                                              | S9  |
| Compound 4 LCMS Double Deprotected Linear Pentapeptide HO- <i>N</i> -Me-Phe-D-Leu-D-Val-Leu-Leu-NH <sub>2</sub>          | S10 |
| Compound 4 NMR Cyclized Pentapeptide <i>N</i> -Me-Phe-D-Leu-D-Val-Leu-Leu                                                | S11 |
| Compound 4 LCMS Cyclized Pentapeptide <i>N</i> -Me-Phe-D-Leu-D-Val-Leu-Leu                                               | S12 |
| Compound 4 HPLC Cyclized Pentapeptide <i>N</i> -Me-Phe-D-Leu-D-Val-Leu-Leu                                               | S13 |
| Compound 5 LCMS Double Deprotected Linear Pentapeptide HO-Phe- <i>N</i> -Me-Leu-D-Val-D-Leu-Leu-NH <sub>2</sub> Leu      | S14 |
| Compound 5 NMR Cyclized Pentapeptide Phe- <i>N</i> -Me-Leu-D-Val-D-Leu-Leu                                               | S15 |
| Compound 5 LCMS Cyclized Pentapeptide Phe- <i>N</i> -Me-Leu-D-Val-D-Leu-Leu                                              | S16 |
| Compound 5 HPLC Cyclized Pentapeptide Phe- <i>N</i> -Me-Leu-D-Val-D-Leu-Leu                                              | S17 |
| Compound 6 NMR Dipeptide MeO-D-Phe-Leu- NHBoc                                                                            | S18 |
| Compound 6 NMR Tripeptide MeO-D-Phe-Leu-Val-NHBoc                                                                        | S19 |
| Compound 6 NMR Dipeptide MeO-Leu-D-Leu-NHBoc                                                                             | S20 |
| Compound 6 NMR Linear Pentapeptide MeO-D-Phe-Leu-Val-Leu-D-Leu-NHBoc                                                     | S21 |
| Compound 6 LCMS Linear Pentapeptide MeO-D-Phe-Leu-Val-Leu-D-Leu-NHBoc                                                    | S22 |
| Compound 6 LCMS Double Deprotected Linear Pentapeptide HO-D-Phe-Leu-Val-Leu-D-Leu-NH <sub>2</sub>                        | S23 |
| Compound 6 NMR Cyclized Pentapeptide D-Phe-Leu-Val-Leu-D-Leu                                                             | S24 |
| Compound 6 LCMS Cyclized Pentapeptide D-Phe-Leu-Val-Leu-D-Leu                                                            | S25 |
| Compound 6 HPLC Cyclized Pentapeptide D-Phe-Leu-Val-Leu-D-Leu                                                            | S26 |
| Compound 7 NMR Dipeptide MeO-D-Phe-Leu-NHBoc                                                                             | S27 |
| Compound 7 NMR Tripeptide MeO-D-Phe-Leu- <i>N</i> -Me-Val-Boc                                                            | S28 |
| Compound 7 NMR Tetrapeptide MeO-D-Phe-Leu- <i>N</i> -Me-Val- <i>N</i> -Me-D-Leu-NBoc                                     | S29 |
| Compound 7 NMR Linear Pentapeptide MeO-D-Phe-Leu- <i>N</i> -Me-Val- <i>N</i> -Me-D-Leu-D-Phe-NHBoc                       | S30 |
| Compound 7 LCMS Double Deprotected Pentapeptide HO-D-Phe-Leu- <i>N</i> -Me-Val- <i>N</i> -Me-D-Leu-D-Phe-NH <sub>2</sub> | S31 |
| Compound 7 NMR Cyclized Pentapeptide D-Phe-Leu- <i>N</i> -Me-Val- <i>N</i> -Me-D-Leu-D-Phe                               | S32 |
| Compound 7 LCMS Cyclized Pentapeptide D-Phe-Leu- <i>N</i> -Me-Val- <i>N</i> -Me-D-Leu-D-Phe                              | S33 |
| Compound 7 HPLC Cyclized Pentapeptide D-Phe-Leu- <i>N</i> -Me-Val- <i>N</i> -Me-D-Leu-D-Phe                              | S34 |
| Compound 10 NMR Dipeptide MeO-D-Phe-D-Leu-NHBoc                                                                          | S35 |
| Compound 10 NMR Tripeptide MeO-D-Phe-D-Leu-Val-NHBoc                                                                     | S36 |

|                                                                                                                          |     |
|--------------------------------------------------------------------------------------------------------------------------|-----|
| Compound 10 NMR Dipeptide MeO-Leu-Leu-NHBoc .....                                                                        | S37 |
| Compound 10 NMR Linear Pentapeptide MeO-D-Phe-D-Leu-Val-Leu-Leu-NHBoc .....                                              | S38 |
| Compound 10 LCMS Linear Pentapeptide MeO-D-Phe-D-Leu-Val-Leu-Leu-NHBoc .....                                             | S39 |
| Compound 10 LCMS Double Deprotected Linear Pentapeptide HO-D-Phe-D-Leu-Val-Leu-Leu-NH <sub>2</sub><br>.....              | S40 |
| Compound 10 NMR Cyclized Pentapeptide D-Phe-D-Leu-Val-Leu-Leu.....                                                       | S41 |
| Compound 10 LCMS Cyclized Pentapeptide D-Phe-D-Leu-Val-Leu-Leu .....                                                     | S42 |
| Compound 10 HPLC Cyclized Pentapeptide D-Phe-D-Leu-Val-Leu-Leu .....                                                     | S43 |
| Compound 12 NMR Tripeptide MeO-Phe-Leu-Val-NHBoc .....                                                                   | S44 |
| Compound 12 NMR Dipeptide MeO-D-Leu-D-Phe-NHBoc.....                                                                     | S45 |
| Compound 12 NMR Linear Pentapeptide MeO-Phe-Leu-Val-D-Leu-D-Phe-NHBoc .....                                              | S46 |
| Compound 12 LCMS Linear Pentapeptide MeO-Phe-Leu-Val-D-Leu-D-Phe-NHBoc .....                                             | S47 |
| Compound 12 LCMS Double Deprotected Linear Pentapeptide HO-Phe-Leu-Val-D-Leu-D-Phe-NH <sub>2</sub>                       | S48 |
| Compound 12 NMR Cyclized Pentapeptide Phe-Leu-Val-D-Leu-D-Phe.....                                                       | S49 |
| Compound 12 LCMS Cyclized Pentapeptide Phe-Leu-Val-D-Leu-D-Phe .....                                                     | S50 |
| Compound 12 HPLC Cyclized Pentapeptide Phe-Leu-Val-D-Leu-D-Phe.....                                                      | S51 |
| Compound 15 NMR Dipeptide MeO-Phe- <i>N</i> -Me-D-Phe-Boc .....                                                          | S52 |
| Compound 15 NMR Tripeptide MeO-Phe- <i>N</i> -Me-D-Phe-Val-NHBoc.....                                                    | S53 |
| Compound 15 NMR Linear Pentapeptide MeO-Phe- <i>N</i> -Me-D-Phe-Val-Leu- <i>N</i> -Me-Leu-Boc .....                      | S54 |
| Compound 15 LCMS Linear Pentapeptide MeO-Phe- <i>N</i> -Me-D-Phe-Val-Leu- <i>N</i> -Me-Leu-Boc .....                     | S55 |
| Compound 15 LCMS Double Deprotected Linear Pentapeptide HO-Phe- <i>N</i> -Me-D-Phe-Val-Leu- <i>N</i> -Me-<br>Leu-H ..... | S56 |
| Compound 15 NMR Cyclized Pentapeptide Phe- <i>N</i> -Me-D-Phe-Val-Leu- <i>N</i> -Me-Leu.....                             | S57 |
| Compound 15 LCMS Cyclized Pentapeptide Phe- <i>N</i> -Me-D-Phe-Val-Leu- <i>N</i> -Me-Leu .....                           | S58 |
| Compound 15 HPLC Cyclized Pentapeptide Phe- <i>N</i> -Me-D-Phe-Val-Leu- <i>N</i> -Me-Leu.....                            | S59 |
| Compound 18 NMR Dipeptide MeO-Phe-D-Phe-NHBoc .....                                                                      | S60 |
| Compound 18 NMR Tripeptide MeO-Phe-D-Phe-D-Val-NHBoc .....                                                               | S61 |
| Compound 18 NMR Dipeptide MeO-Leu-Leu-NHBoc .....                                                                        | S62 |
| Compound 18 NMR Linear Pentapeptide MeO-Phe-D-Phe-D-Val-Leu-Leu-NHBoc .....                                              | S63 |
| Compound 18 LCMS Linear Pentapeptide MeO-Phe-D-Phe-D-Val-Leu-Leu-NHBoc .....                                             | S64 |
| Compound 18 LCMS Double Deprotected Linear Pentapeptide HO-Phe-D-Phe-D-Val-Leu-Leu-NH <sub>2</sub>                       | S65 |
| Compound 18 NMR Cyclized Pentapeptide Phe-D-Phe-D-Val-Leu-Leu .....                                                      | S66 |
| Compound 18 LCMS Cyclized Pentapeptide Phe-D-Phe-D-Val-Leu-Leu .....                                                     | S67 |
| Compound 18 HPLC Cyclized Pentapeptide Phe-D-Phe-D-Val-Leu-Leu.....                                                      | S68 |
| Compound 20 LCMS Double Deprotected Linear Pentapeptide HO-D-Phe-D-Val-Cha-Ser(Bzl)-Phe-<br>NH <sub>2</sub> .....        | S69 |
| Compound 20 NMR Cyclized Pentapeptide Phe-D-Phe-D-Val-Cha-Ser(Bzl) .....                                                 | S70 |
| Compound 20 LCMS Cyclized Pentapeptide Phe-D-Phe-D-Val-Cha-Ser(Bzl) .....                                                | S71 |
| Compound 20 HPLC Cyclized Pentapeptide Phe-D-Phe-D-Val-Cha-Ser(Bzl) .....                                                | S72 |
| Compound 21 LCMS Double Deprotected Pentapeptide HO-Phe- <i>N</i> -Me-D-Phe-D-Val-Cha-Ser(Bzl)-<br>NH <sub>2</sub> ..... | S73 |
| Compound 21 NMR Cyclized Protected Pentapeptide Phe- <i>N</i> -Me-D-Phe-D-Val-Cha-Ser(Bzl) .....                         | S74 |
| Compound 21 NMR Cyclized Pentapeptide Phe- <i>N</i> -Me-D-Phe-D-Val-Cha-Ser.....                                         | S75 |
| Compound 21 LCMS Cyclized Pentapeptide <b>Phe-<i>N</i>-Me-D-Phe-D-Val-Cha-Ser</b> .....                                  | S76 |
| Compound 21 HPLC Cyclized Pentapeptide Phe- <i>N</i> -Me-D-Phe-D-Val-Cha-Ser.....                                        | S77 |
| Compound 23 NMR Dipeptide MeO-D-Tyr-Leu-NHBoc .....                                                                      | S78 |
| Compound 23 NMR Tripeptide MeO-D-Tyr-Leu-Val-NHBoc .....                                                                 | S79 |
| Compound 23 NMR Dipeptide MeO-Lys(Cbz)-Leu-NHBoc .....                                                                   | S80 |
| Compound 23 NMR Linear Pentapeptide MeO-D-Tyr-Leu-Val-Lys(Cbz)-Leu-NHBoc.....                                            | S81 |

|                                                                                                                               |      |
|-------------------------------------------------------------------------------------------------------------------------------|------|
| Compound 23 NMR Cyclized Pentapeptide D-Tyr-Leu-Val-Lys(Cbz)-Leu .....                                                        | S82  |
| Compound 23 LCMS Cyclized Pentapeptide D-Tyr-Leu-Val-Lys(Cbz)-Leu .....                                                       | S83  |
| Compound 24 NMR Dipeptide MeO-D-Tyr-Leu-NHBoc .....                                                                           | S84  |
| Compound 24 NMR Tripeptide MeO-D-Tyr-Leu-Val-NHBoc .....                                                                      | S85  |
| Compound 24 NMR Dipeptide MeO-Lys(Cbz)-Leu-NHBoc .....                                                                        | S86  |
| Compound 24 NMR Linear Pentapeptide MeO-D-Tyr-Leu-Val-Lys(Cbz)-Leu-NHBoc .....                                                | S87  |
| Compound 24 NMR Cyclized Pentapeptide D-Tyr-Leu-Val-Lys-Leu .....                                                             | S88  |
| Compound 24 LCMS Cyclized Pentapeptide D-Tyr-Leu-Val-Lys-Leu .....                                                            | S89  |
| Compound 26 NMR Dipeptide MeO-D-Trp-Leu-NHBoc .....                                                                           | S90  |
| Compound 26 NMR Tripeptide MeO-D-Trp-Leu-Val-NHBoc .....                                                                      | S91  |
| Compound 26 NMR Dipeptide MeO-Arg(2Cbz)-Leu-NHBoc .....                                                                       | S92  |
| Compound 26 NMR Linear Pentapeptide MeO-D-Trp-Leu-Val-Arg(2Cbz)-Leu-NHBoc.....                                                | S93  |
| Compound 26 NMR Cyclized Pentapeptide D-Trp-Leu-Val-Arg(2Cbz)-Leu .....                                                       | S94  |
| Compound 26 LCMS Cyclized Pentapeptide D-Trp-Leu-Val-Arg(2Cbz)-Leu .....                                                      | S95  |
| Compound 27 NMR Dipeptide MeO-D-Trp-Leu-NHBoc .....                                                                           | S96  |
| Compound 27 NMR Tripeptide MeO-D-Trp-Leu-Val-NHBoc .....                                                                      | S97  |
| Compound 27 NMR Dipeptide MeO-Arg(2Cbz)-Leu-NHBoc .....                                                                       | S98  |
| Compound 27 NMR Linear Pentapeptide MeO-D-Trp-Leu-Val-Arg(2Cbz)-Leu-NHBoc.....                                                | S99  |
| Compound 27 NMR Cyclized Pentapeptide D-Trp-Leu-Val-Arg-Leu .....                                                             | S100 |
| Compound 27 LCMS Cyclized Pentapeptide D-Trp-Leu-Val-Arg-Leu .....                                                            | S101 |
| Compound 28 NMR Dipeptide MeO-Phe- <i>N</i> -Me-D-Phe-NBoc .....                                                              | S102 |
| Compound 28 NMR Tripeptide MeO-Phe- <i>N</i> -Me-D-Phe-Val-NHBoc.....                                                         | S103 |
| Compound 28 NMR Dipeptide MeO-Leu-Lys(Cbz)-NHBoc .....                                                                        | S104 |
| Compound 28 NMR Linear Pentapeptide MeO-Phe- <i>N</i> -Me-D-Phe-Val-Leu-Lys(Cbz)-NHBoc .....                                  | S105 |
| Compound 28 LCMS Linear Pentapeptide MeO-Phe- <i>N</i> -Me-D-Phe-Val-Leu-Lys(Cbz)-NHBoc .....                                 | S106 |
| Compound 28 LCMS Double Deprotected Linear Pentapeptide HO-Phe- <i>N</i> -Me-D-Phe-Val-Leu-<br>Lys(Cbz)-NH <sub>2</sub> ..... | S107 |
| Compound 28 NMR Cyclized Pentapeptide Phe- <i>N</i> -Me-D-Phe-Val-Leu-Lys(Cbz) .....                                          | S108 |
| Compound 28 LCMS Cyclized Pentapeptide Phe- <i>N</i> -Me-D-Phe-Val-Leu-Lys(Cbz) .....                                         | S109 |
| Compound 29 LCMS Double Deprotected Linear Pentapeptide HO-Phe- <i>N</i> -Me-D-Phe-Val-Leu-<br>Lys(Boc)-NH <sub>2</sub> ..... | S110 |
| Compound 29 NMR Cyclized Pentapeptide Phe- <i>N</i> -Me-D-Phe-Val-Leu-Lys(Boc) .....                                          | S111 |
| Compound 29 LCMS Cyclized Pentapeptide Phe- <i>N</i> -Me-D-Phe-Val-Leu-Lys(Boc) .....                                         | S112 |
| Compound 29 HPLC Cyclized Pentapeptide Phe- <i>N</i> -Me-D-Phe-Val-Leu-Lys(Boc) .....                                         | S113 |
| Compound 30 NMR Dipeptide MeO-Phe- <i>N</i> -Me-D-Phe-NBoc .....                                                              | S114 |
| Compound 30 NMR Tripeptide MeO-Phe- <i>N</i> -Me-D-Phe-Val-NHBoc.....                                                         | S115 |
| Compound 30 NMR Dipeptide MeO-Leu-Lys(Cbz)-NHBoc .....                                                                        | S116 |
| Compound 30 NMR Linear Pentapeptide MeO-Phe- <i>N</i> -Me-D-Phe-Val-Leu-Lys(Cbz)-NHBoc .....                                  | S117 |
| Compound 30 LCMS Linear Pentapeptide MeO-Phe- <i>N</i> -Me-D-Phe-Val-Leu-Lys(Cbz)-NHBoc .....                                 | S118 |
| Compound 30 LCMS Double Deprotected Linear Pentapeptide HO-Phe- <i>N</i> -Me-D-Phe-Val-Leu-<br>Lys(Cbz)-NH <sub>2</sub> ..... | S119 |
| Compound 30 NMR Cyclized Protected Pentapeptide Phe- <i>N</i> -Me-D-Phe-Val-Leu-Lys(Cbz) .....                                | S120 |
| Compound 30 LCMS Cyclized Protected Pentapeptide Phe- <i>N</i> -Me-D-Phe-Val-Leu-Lys(Cbz) .....                               | S121 |
| Compound 30 NMR Cyclized Pentapeptide Phe- <i>N</i> -Me-D-Phe-Val-Leu-Lys.....                                                | S122 |
| Compound 30 LCMS Cyclized Pentapeptide Phe- <i>N</i> -Me-D-Phe-Val-Leu-Lys.....                                               | S123 |
| Compound 30 HPLC Cyclized Pentapeptide Phe- <i>N</i> -Me-D-Phe-Val-Leu-Lys .....                                              | S124 |
| Compound 31 LCMS Double Deprotected Linear Pentapeptide HO-Phe-Leu-Val-Leu-Lys(Boc)-NH <sub>2</sub><br>.....                  | S125 |
| Compound 31 NMR Cyclized Pentapeptide Phe-Leu-Val-Leu-Lys(Boc) .....                                                          | S126 |

|                                                                                                                                                        |      |
|--------------------------------------------------------------------------------------------------------------------------------------------------------|------|
| Compound 31 LCMS Cyclized Pentapeptide Phe-Leu-Val-Leu-Lys(Boc) .....                                                                                  | S127 |
| Compound 32 LCMS Double Deprotected Linear Pentapeptide HO-Phe-Leu-Val-Leu-Lys(Boc)-NH <sub>2</sub><br>.....                                           | S128 |
| Compound 32 NMR Cyclized Pentapeptide Phe-Leu-Val-Leu-Lys .....                                                                                        | S129 |
| Compound 32 LCMS Cyclized Pentapeptide Phe-Leu-Val-Leu-Lys .....                                                                                       | S130 |
| Compound 34 LCMS Double Deprotected Linear Pentapeptide HO-Leu- <i>N</i> -Me-Lys(Boc)-Phe-Leu-Val-<br>NH <sub>2</sub> .....                            | S131 |
| Compound 34 NMR Cyclized Pentapeptide Phe-Leu-Val-Leu- <i>N</i> -Me-Lys(Boc) .....                                                                     | S132 |
| Compound 34 LCMS Cyclized Pentapeptide Phe-Leu-Val-Leu- <i>N</i> -Me-Lys(Boc) .....                                                                    | S133 |
| Compound 34 HPLC Cyclized Pentapeptide Phe-Leu-Val-Leu- <i>N</i> -Me-Lys(Boc) .....                                                                    | S134 |
| Compound 35 LCMS Double Deprotected Linear Pentapeptide HO-Leu- <i>N</i> -Me-Lys(Boc)-Phe-Leu-Val-<br>NH <sub>2</sub> .....                            | S135 |
| Compound 35 NMR Cyclized Pentapeptide Phe-Leu-Val-Leu- <i>N</i> -Me-Lys.....                                                                           | S136 |
| Compound 35 LCMS Cyclized Pentapeptide Phe-Leu-Val-Leu- <i>N</i> -Me-Lys .....                                                                         | S137 |
| Compound 35 HPLC Cyclized Pentapeptide Phe-Leu-Val-Leu- <i>N</i> -Me-Lys .....                                                                         | S138 |
| Compound 36 LCMS Double Deprotected Linear Pentapeptide HO-Leu-Lys(Boc)-Phe-Leu- <i>D</i> -Val-NH <sub>2</sub><br>.....                                | S139 |
| Compound 36 NMR Cyclized Pentapeptide Phe-Leu- <i>D</i> -Val-Leu-Lys(Boc).....                                                                         | S140 |
| Compound 36 LCMS Cyclized Pentapeptide Phe-Leu- <i>D</i> -Val-Leu-Lys(Boc) .....                                                                       | S141 |
| Compound 36 HPLC Cyclized Pentapeptide Phe-Leu- <i>D</i> -Val-Leu-Lys(Boc).....                                                                        | S142 |
| Compound 37 LCMS Double Deprotected Linear Pentapeptide HO-Leu-Lys(Boc)-Phe-Leu- <i>D</i> -Val-NH <sub>2</sub><br>.....                                | S143 |
| Compound 37 NMR Cyclized Pentapeptide Phe-Leu- <i>D</i> -Val-Leu-Lys .....                                                                             | S144 |
| Compound 37 LCMS Cyclized Pentapeptide Phe-Leu- <i>D</i> -Val-Leu-Lys .....                                                                            | S145 |
| Compound 37 HPLC Cyclized Pentapeptide Phe-Leu- <i>D</i> -Val-Leu-Lys.....                                                                             | S146 |
| Compound 39 LCMS Double Deprotected Linear Pentapeptide HO-Leu- <i>N</i> -Me-Val-Lys(2-Cl-Z)- <i>D</i> -Phe-<br>Phe-NH <sub>2</sub> .....              | S147 |
| Compound 39 NMR Cyclized Pentapeptide Phe-Leu- <i>N</i> -Me-Val-Lys(2-Cl-Z)- <i>D</i> -Phe .....                                                       | S148 |
| Compound 39 LCMS Cyclized Pentapeptide Phe-Leu- <i>N</i> -Me-Val-Lys(2-Cl-Z)- <i>D</i> -Phe .....                                                      | S149 |
| Compound 39 HPLC Cyclized Pentapeptide Phe-Leu- <i>N</i> -Me-Val-Lys(2-Cl-Z)- <i>D</i> -Phe.....                                                       | S150 |
| Compound 40 LCMS Double Deprotected Linear Pentapeptide HO-Leu- <i>N</i> -Me-Val- <i>D</i> -Lys(Cbz)- <i>D</i> -Phe-<br>Phe-NH <sub>2</sub> .....      | S151 |
| Compound 40 NMR Cyclized Pentapeptide Phe-Leu- <i>N</i> -Me-Val- <i>D</i> -Lys(Cbz)- <i>D</i> -Phe .....                                               | S152 |
| Compound 40 LCMS Cyclized Pentapeptide Phe-Leu- <i>N</i> -Me-Val- <i>D</i> -Lys(Cbz)- <i>D</i> -Phe .....                                              | S153 |
| Compound 40 HPLC Cyclized Pentapeptide Phe-Leu- <i>N</i> -Me-Val- <i>D</i> -Lys(Cbz)- <i>D</i> -Phe.....                                               | S154 |
| Compound 41 LCMS Double Deprotected Linear Pentapeptide HO-Phe-Leu-Val- <i>N</i> -Me- <i>D</i> -Lys(2-Cl-<br>Cbz)- <i>D</i> -Phe-NH <sub>2</sub> ..... | S155 |
| Compound 41 NMR Cyclized Pentapeptide Phe-Leu-Val- <i>N</i> -Me- <i>D</i> -Lys(2-Cl-Cbz)- <i>D</i> -Phe.....                                           | S156 |
| Compound 41 LCMS Cyclized Pentapeptide Phe-Leu-Val- <i>N</i> -Me- <i>D</i> -Lys(2-Cl-Cbz)- <i>D</i> -Phe .....                                         | S157 |
| Compound 41 HPLC Cyclized Pentapeptide Phe-Leu-Val- <i>N</i> -Me- <i>D</i> -Lys(2-Cl-Cbz)- <i>D</i> -Phe.....                                          | S158 |
| Compound 42 NMR Linear Pentapeptide MeO-Leu-Val- <i>D</i> -Lys(2-Cl-Z)- <i>N</i> -Me- <i>D</i> -Phe-Phe-NHBoc                                          | S159 |
| Compound 42 LCMS Linear Pentapeptide MeO-Leu-Val- <i>D</i> -Lys(2-Cl-Z)- <i>N</i> -Me- <i>D</i> -Phe-Phe-NHBoc<br>.....                                | S160 |
| Compound 42 LCMS Double Deprotected Linear Pentapeptide HO-Leu-Val- <i>D</i> -Lys(2-Cl-Z)- <i>N</i> -Me- <i>D</i> -<br>Phe-Phe-NH <sub>2</sub> .....   | S161 |
| Compound 42 NMR Cyclized Pentapeptide Phe-Leu-Val- <i>D</i> -Lys(2-Cl-Z)- <i>N</i> -Me- <i>D</i> -Phe.....                                             | S162 |
| Compound 42 LCMS Cyclized Pentapeptide Phe-Leu-Val- <i>D</i> -Lys(2-Cl-Z)- <i>N</i> -Me- <i>D</i> -Phe .....                                           | S163 |
| Compound 42 HPLC Cyclized Pentapeptide Phe-Leu-Val- <i>D</i> -Lys(2-Cl-Z)- <i>N</i> -Me- <i>D</i> -Phe.....                                            | S164 |



|                                                                                                                               |      |
|-------------------------------------------------------------------------------------------------------------------------------|------|
| Compound 43 LCMS Double Deprotected Linear Pentapeptide HO-Leu- <i>N</i> -Me-Val-D-Leu-D-Phe-β-OH-Phe-NH <sub>2</sub> .....   | S165 |
| Compound 43 NMR Cyclized Pentapeptide β-benzyloxy-Phe-Leu- <i>N</i> -Me-Val-D-Leu-D-Phe.....                                  | S166 |
| Compound 43 ROESY NMR Cyclized Pentapeptide β-benzyloxy-Phe-Leu- <i>N</i> -Me-Val-D-Leu-D-Phe. S167                           |      |
| Compound 43 TOSCY NMR Cyclized Pentapeptide β-benzyloxy-Phe-Leu- <i>N</i> -Me-Val-D-Leu-D-Phe. S168                           |      |
| Compound 43 LCMS Cyclized Pentapeptide β-benzyloxy-Phe-Leu- <i>N</i> -Me-Val-D-Leu-D-Phe .....                                | S169 |
| Compound 43 HPLC Cyclized Pentapeptide β-benzyloxy-Phe-Leu- <i>N</i> -Me-Val-D-Leu-D-Phe.....                                 | S170 |
| Compound 44 LCMS Double Deprotected Linear Pentapeptide HO-Leu- <i>N</i> -Me-Val-D-Leu-D-Phe-β-OH-Phe-NH <sub>2</sub> .....   | S171 |
| Compound 44 NMR Cyclized Pentapeptide β-benzyloxy-Phe-Leu- <i>N</i> -Me-Val-D-Leu-D-Phe.....                                  | S172 |
| Compound 44 ROESY NMR Cyclized Pentapeptide β-benzyloxy-Phe-Leu- <i>N</i> -Me-Val-D-Leu-D-Phe. S173                           |      |
| Compound 44 TOSCY NMR Cyclized Pentapeptide β-benzyloxy-Phe-Leu- <i>N</i> -Me-Val-D-Leu-D-Phe. S174                           |      |
| Compound 44 LCMS Cyclized Pentapeptide β-benzyloxy-Phe-Leu- <i>N</i> -Me-Val-D-Leu-D-Phe .....                                | S175 |
| Compound 44 HPLC Cyclized Pentapeptide β-benzyloxy-Phe-Leu- <i>N</i> -Me-Val-D-Leu-D-Phe.....                                 | S176 |
| Compound 45 LCMS Double Deprotected Linear Pentapeptide HO-Leu- <i>N</i> -Me-Val-D-Leu-D-Phe-β-OH-D-Phe-NH <sub>2</sub> ..... | S177 |
| Compound 45 NMR Cyclized Pentapeptide β-benzyloxy-Phe-Leu- <i>N</i> -Me-Val-D-Leu-D-Phe.....                                  | S178 |
| Compound 45 LCMS Cyclized Pentapeptide β-benzyloxy-Phe-Leu- <i>N</i> -Me-Val-D-Leu-D-Phe .....                                | S179 |
| Compound 45 HPLC Cyclized Pentapeptide β-benzyloxy-Phe-Leu- <i>N</i> -Me-Val-D-Leu-D-Phe.....                                 | S180 |
| Compound 46 LCMS Double Deprotected Linear Pentapeptide HO-Leu- <i>N</i> -Me-Val-D-Leu-D-Phe-β-OH-Phe-NH <sub>2</sub> .....   | S181 |
| Compound 46 NMR Cyclized Pentapeptide β-benzyloxy-Phe-Leu- <i>N</i> -Me-Val-D-Leu-D-Phe.....                                  | S182 |
| Compound 46 ROSEY NMR Cyclized Pentapeptide β-benzyloxy-Phe-Leu- <i>N</i> -Me-Val-D-Leu-D-Phe. S183                           |      |
| Compound 46 TOSCY NMR Cyclized Pentapeptide β-benzyloxy-Phe-Leu- <i>N</i> -Me-Val-D-Leu-D-Phe. S184                           |      |
| Compound 46 LCMS Cyclized Pentapeptide β-benzyloxy-Phe-Leu- <i>N</i> -Me-Val-D-Leu-D-Phe .....                                | S185 |
| Compound 46 HPLC Cyclized Pentapeptide β-benzyloxy-Phe-Leu- <i>N</i> -Me-Val-D-Leu-D-Phe.....                                 | S186 |

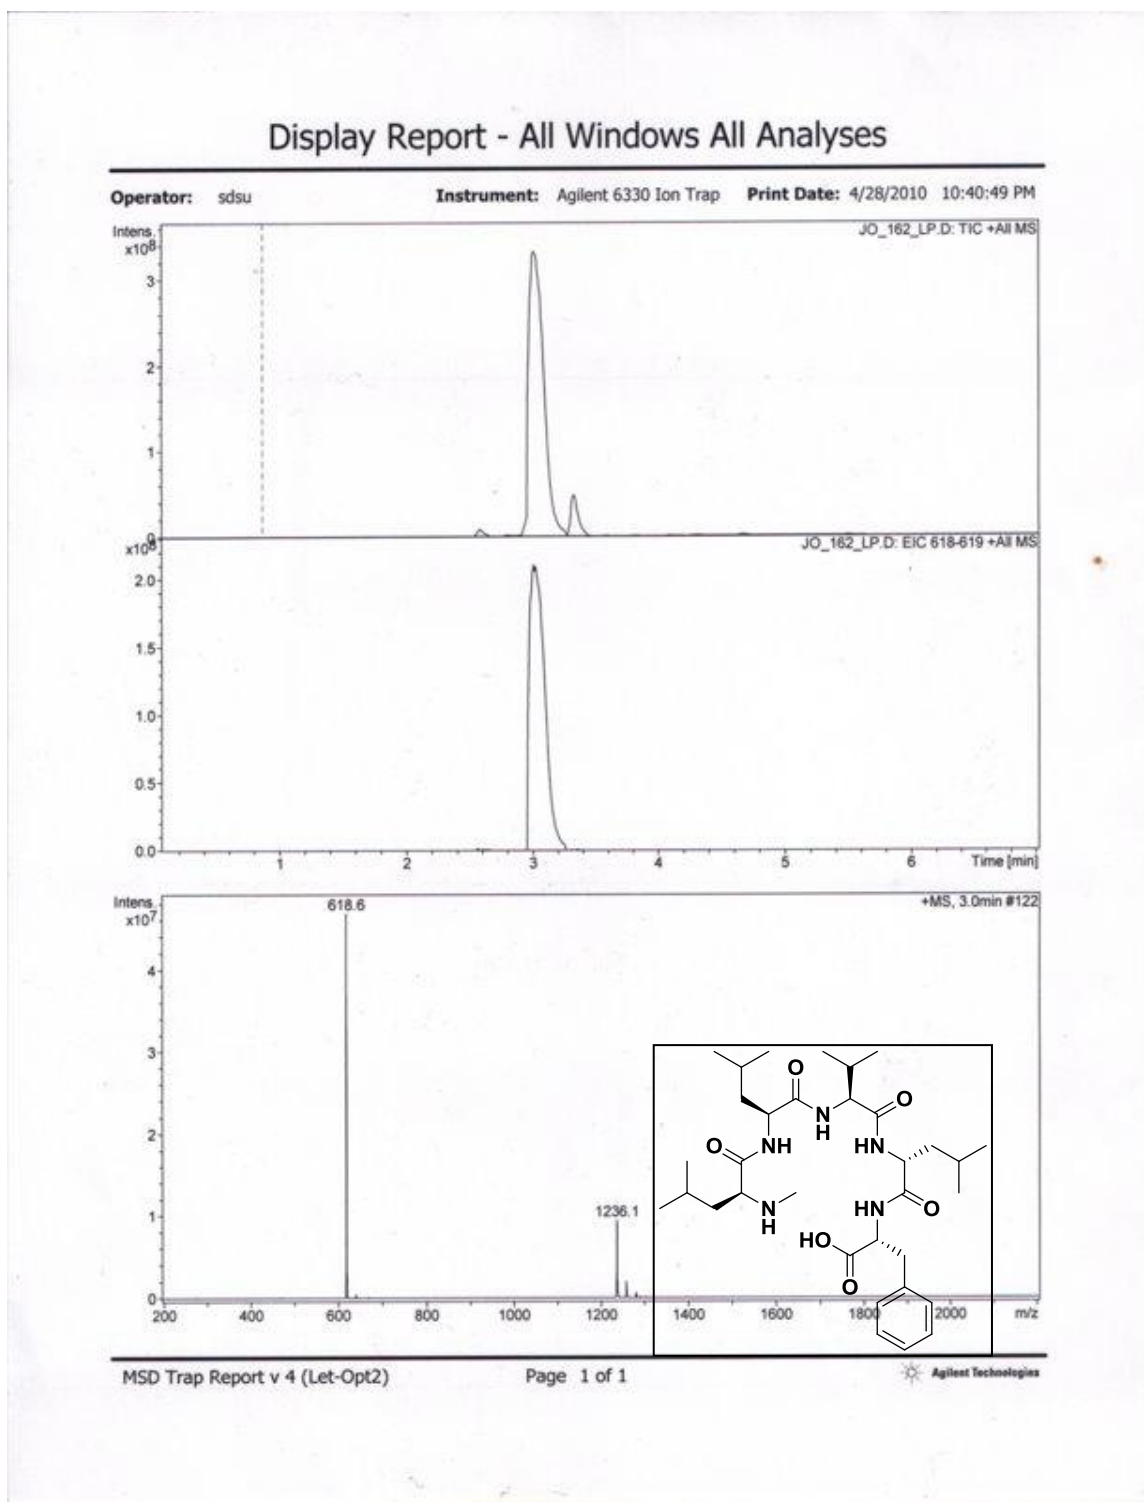

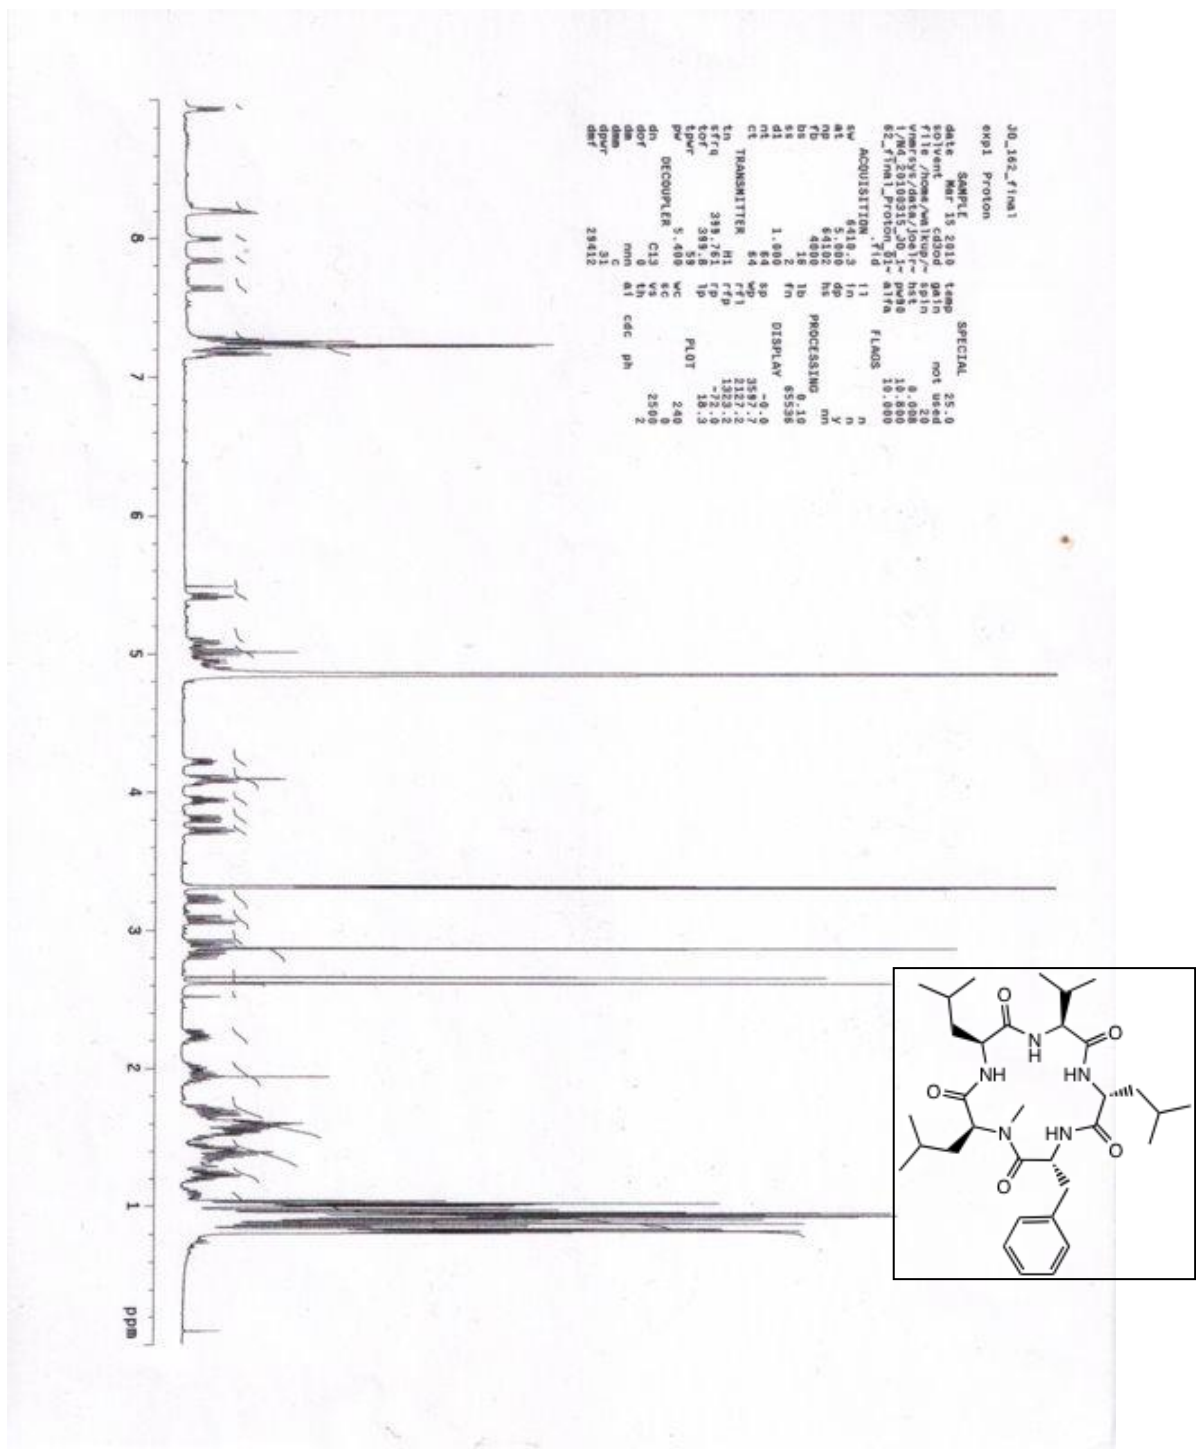

Compound 3 NMR Cyclized Pentapeptide D-Phe-D-Leu-Val-Leu-N-Me-Leu

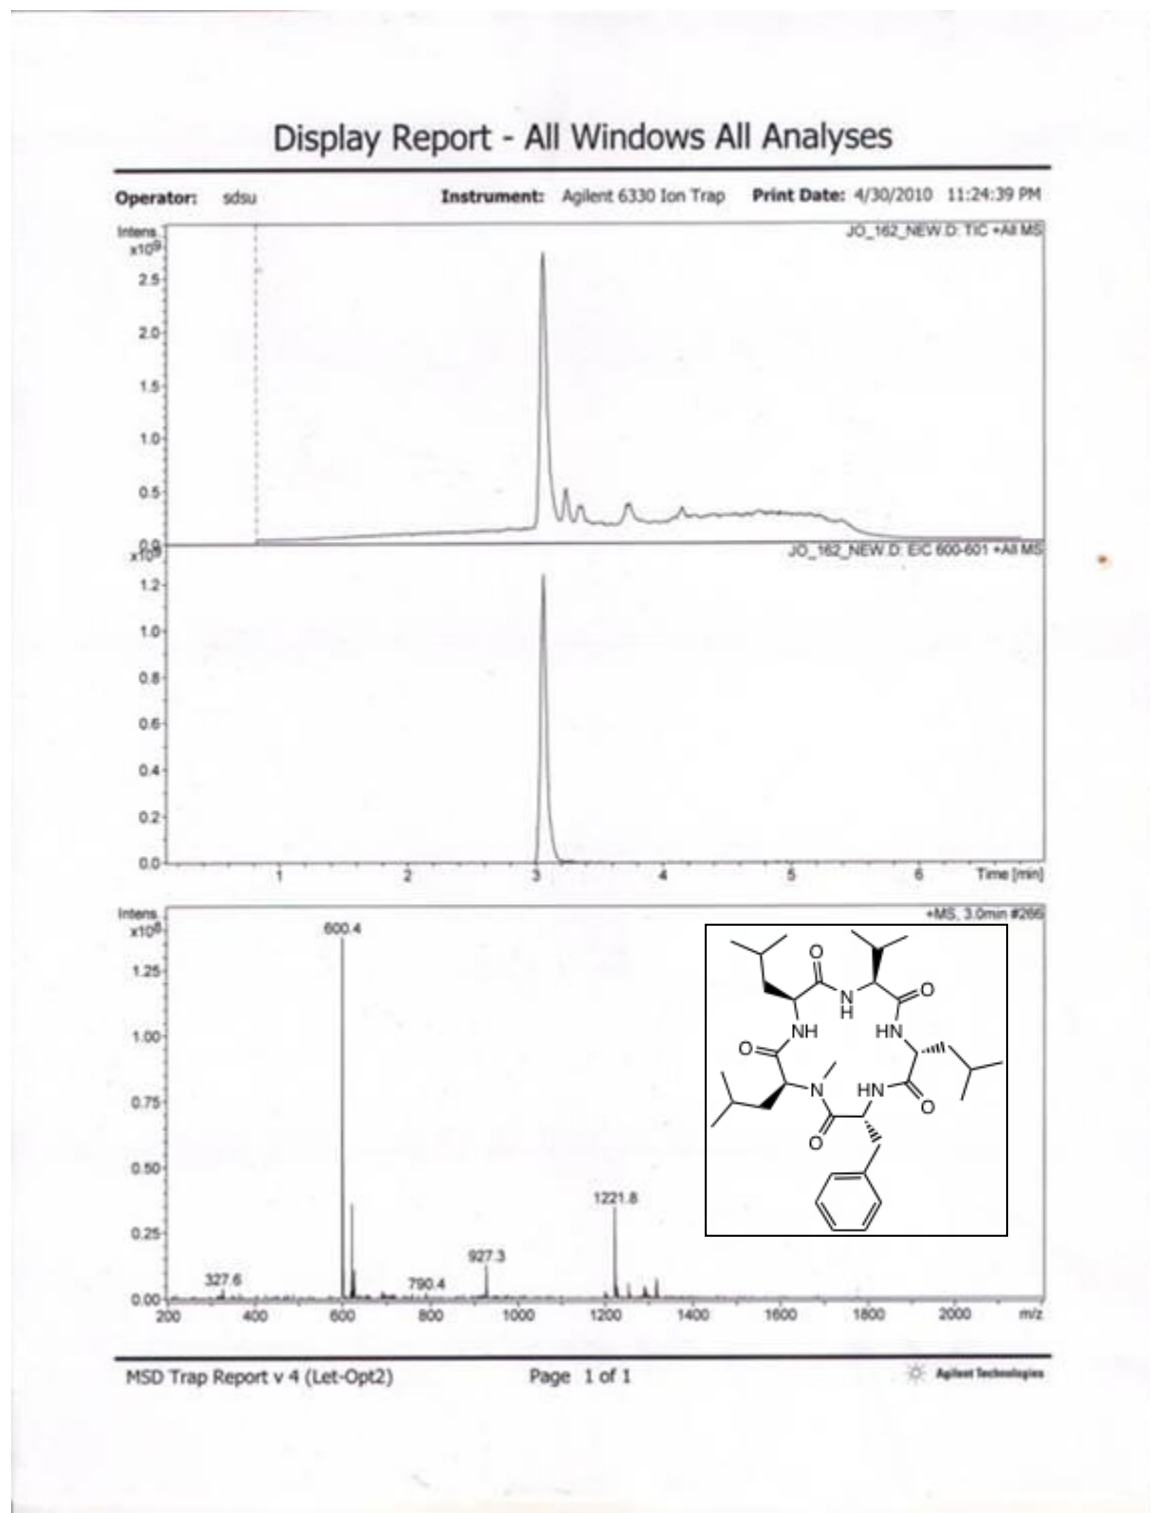

Compound 3 LCMS Cyclized Pentapeptide D-Phe-D-Leu-Val-Leu-N-Me-Leu (MW=600)

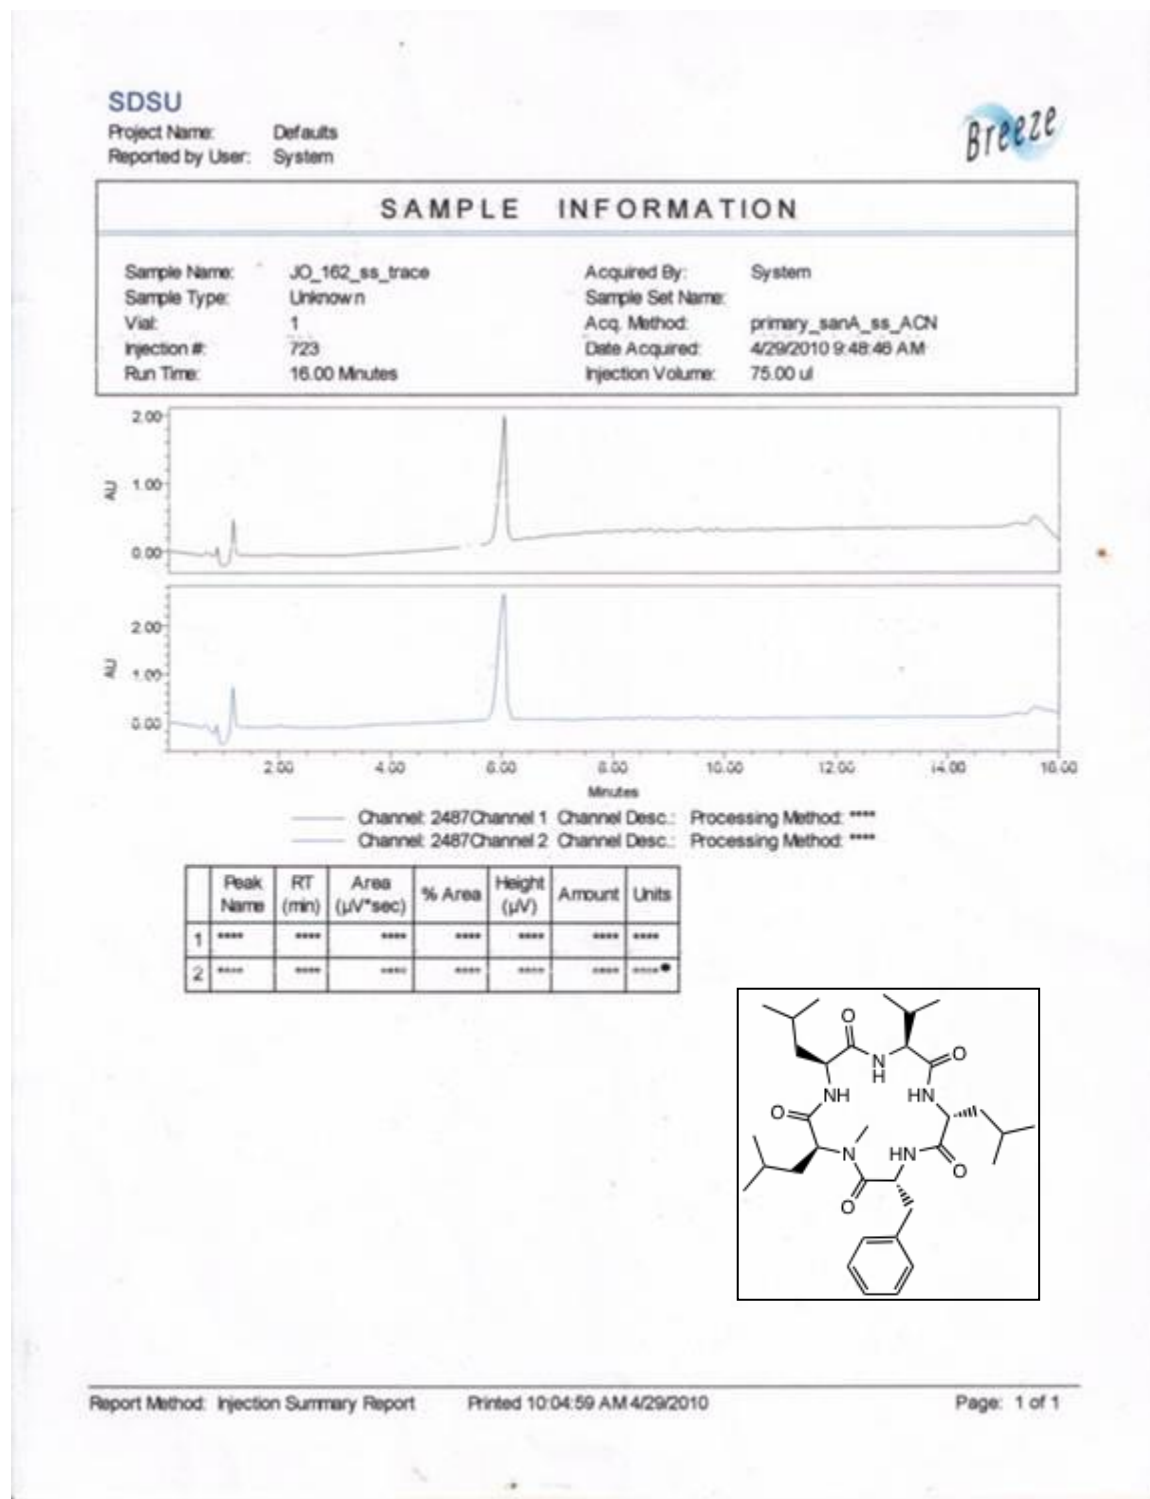

Compound 3 HPLC Cyclized Pentapeptide D-Phe-D-Leu-Val-Leu-N-Me-Leu

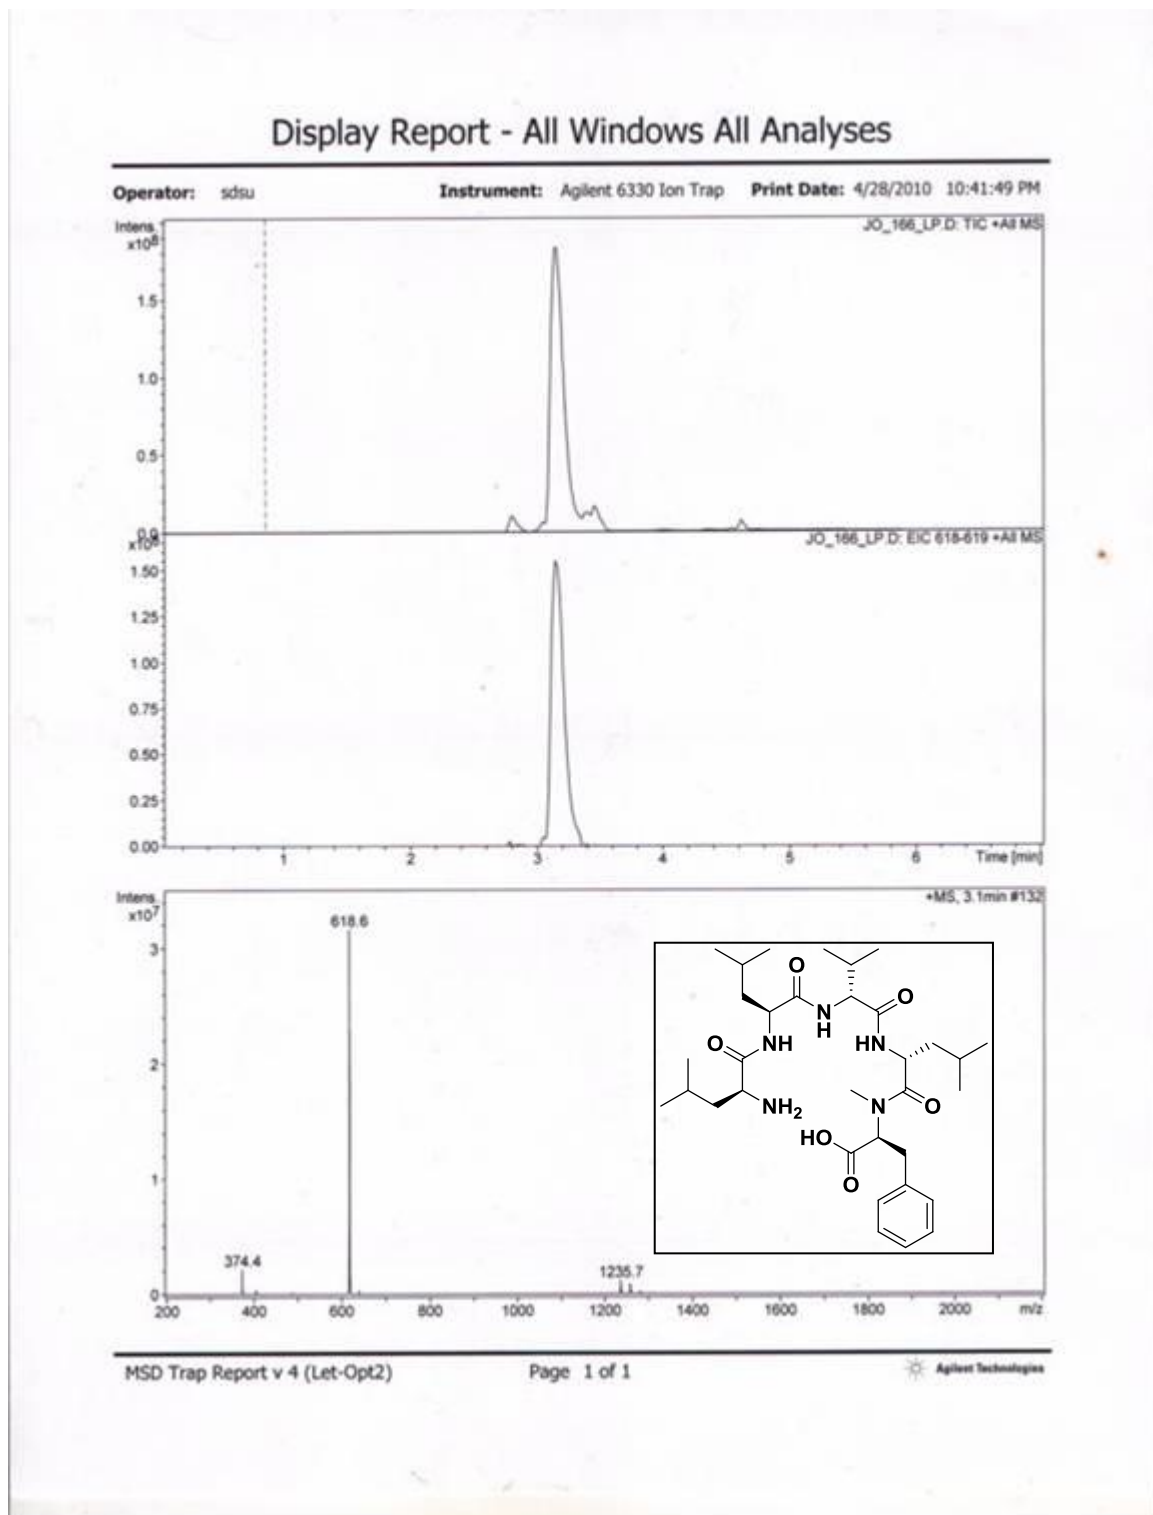

Compound 4 LCMS Double Deprotected Linear Pentapeptide HO-N-Me-Phe-D-Leu-D-Val-Leu-Leu-NH<sub>2</sub> (MW=618)

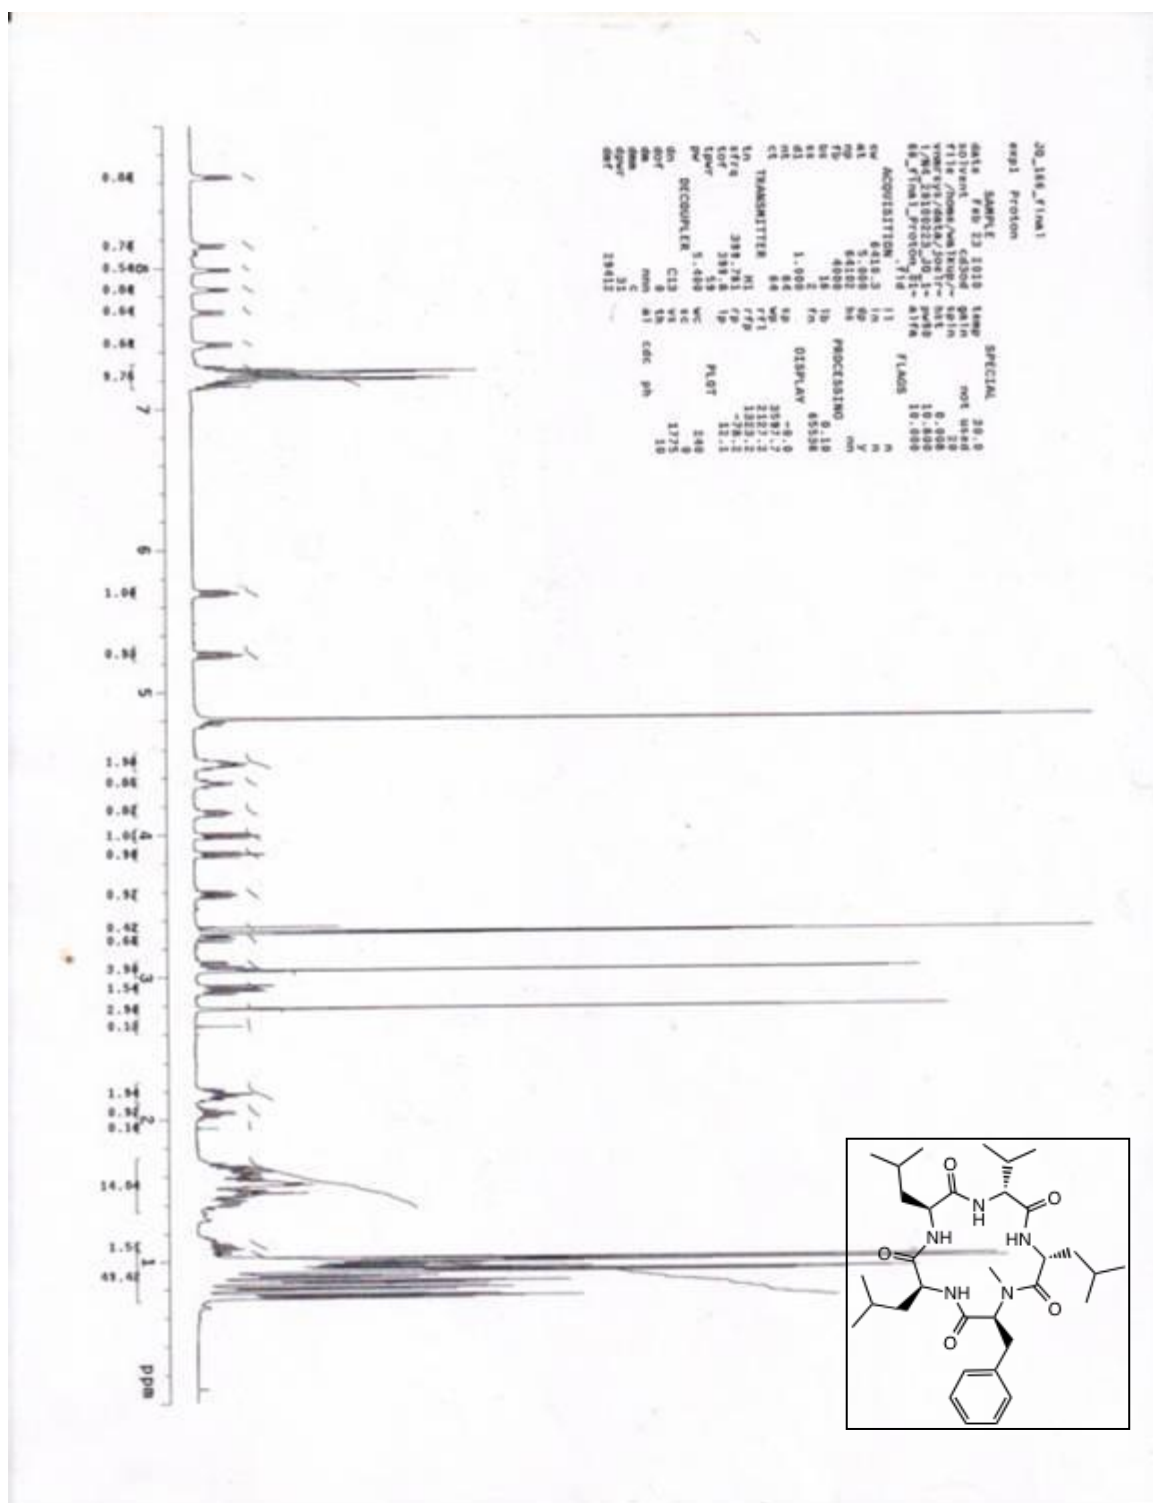Compound 4 NMR Cyclized Pentapeptide *N*-Me-Phe-D-Leu-D-Val-Leu-Leu

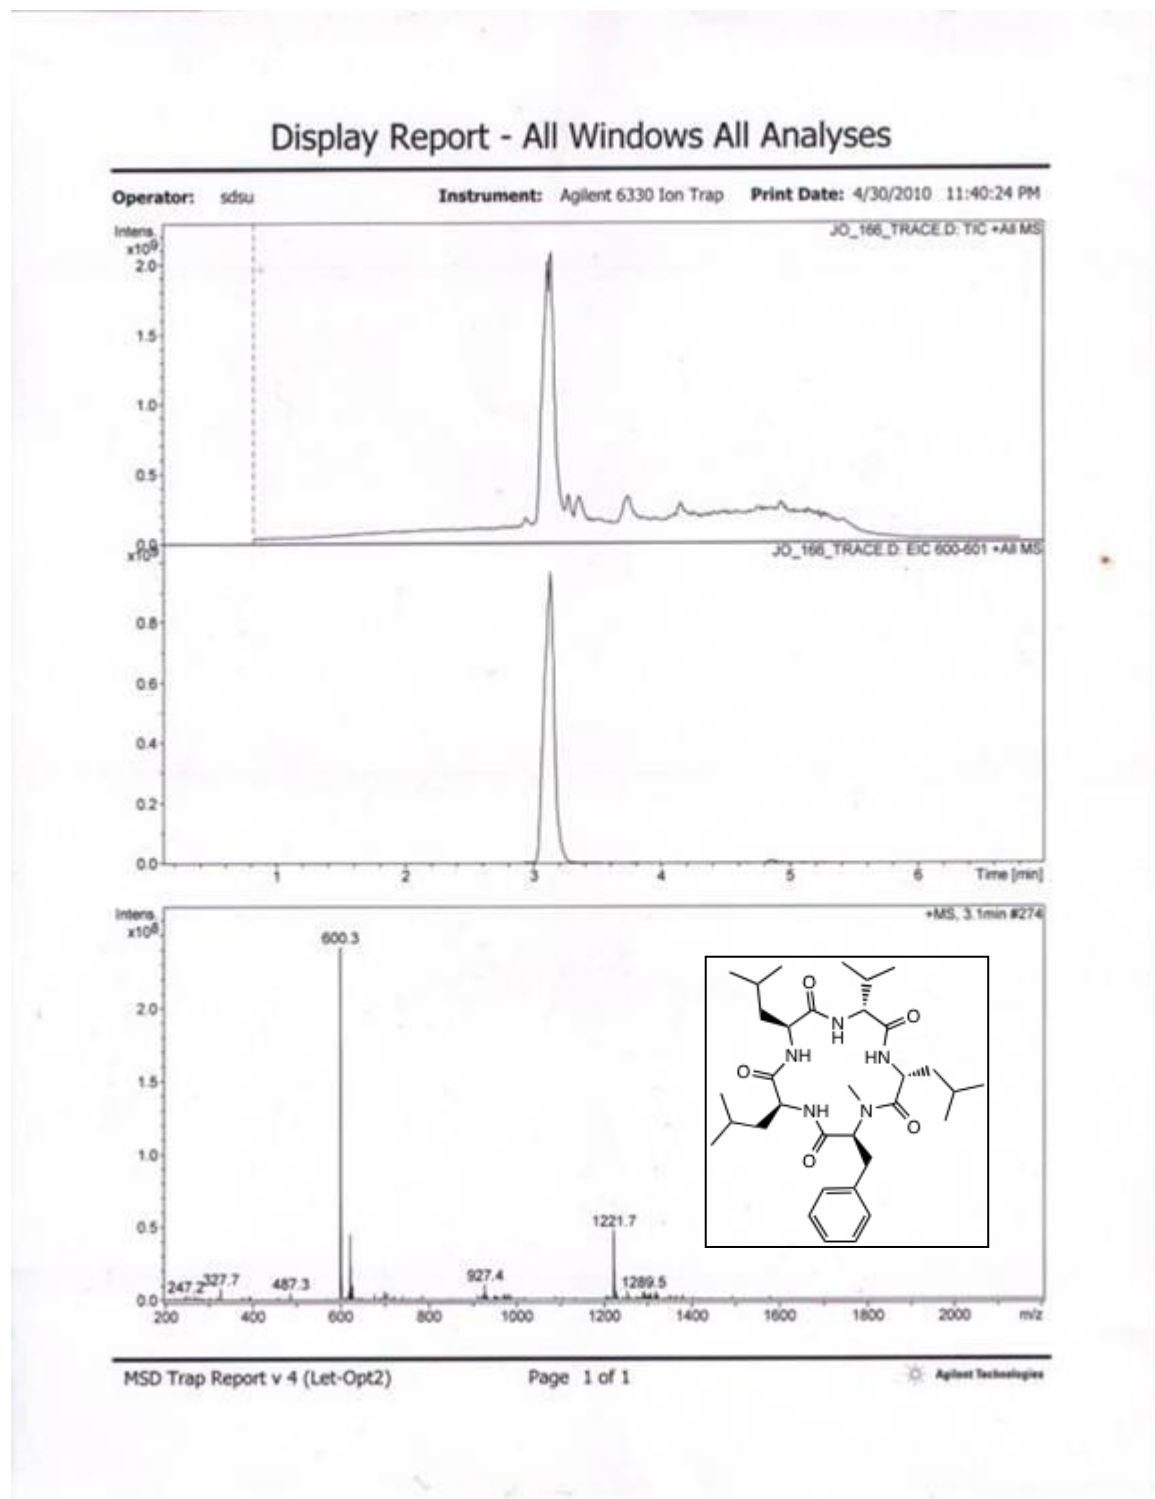Compound 4 LCMS Cyclized Pentapeptide *N*-Me-Phe-D-Leu-D-Val-Leu-Leu



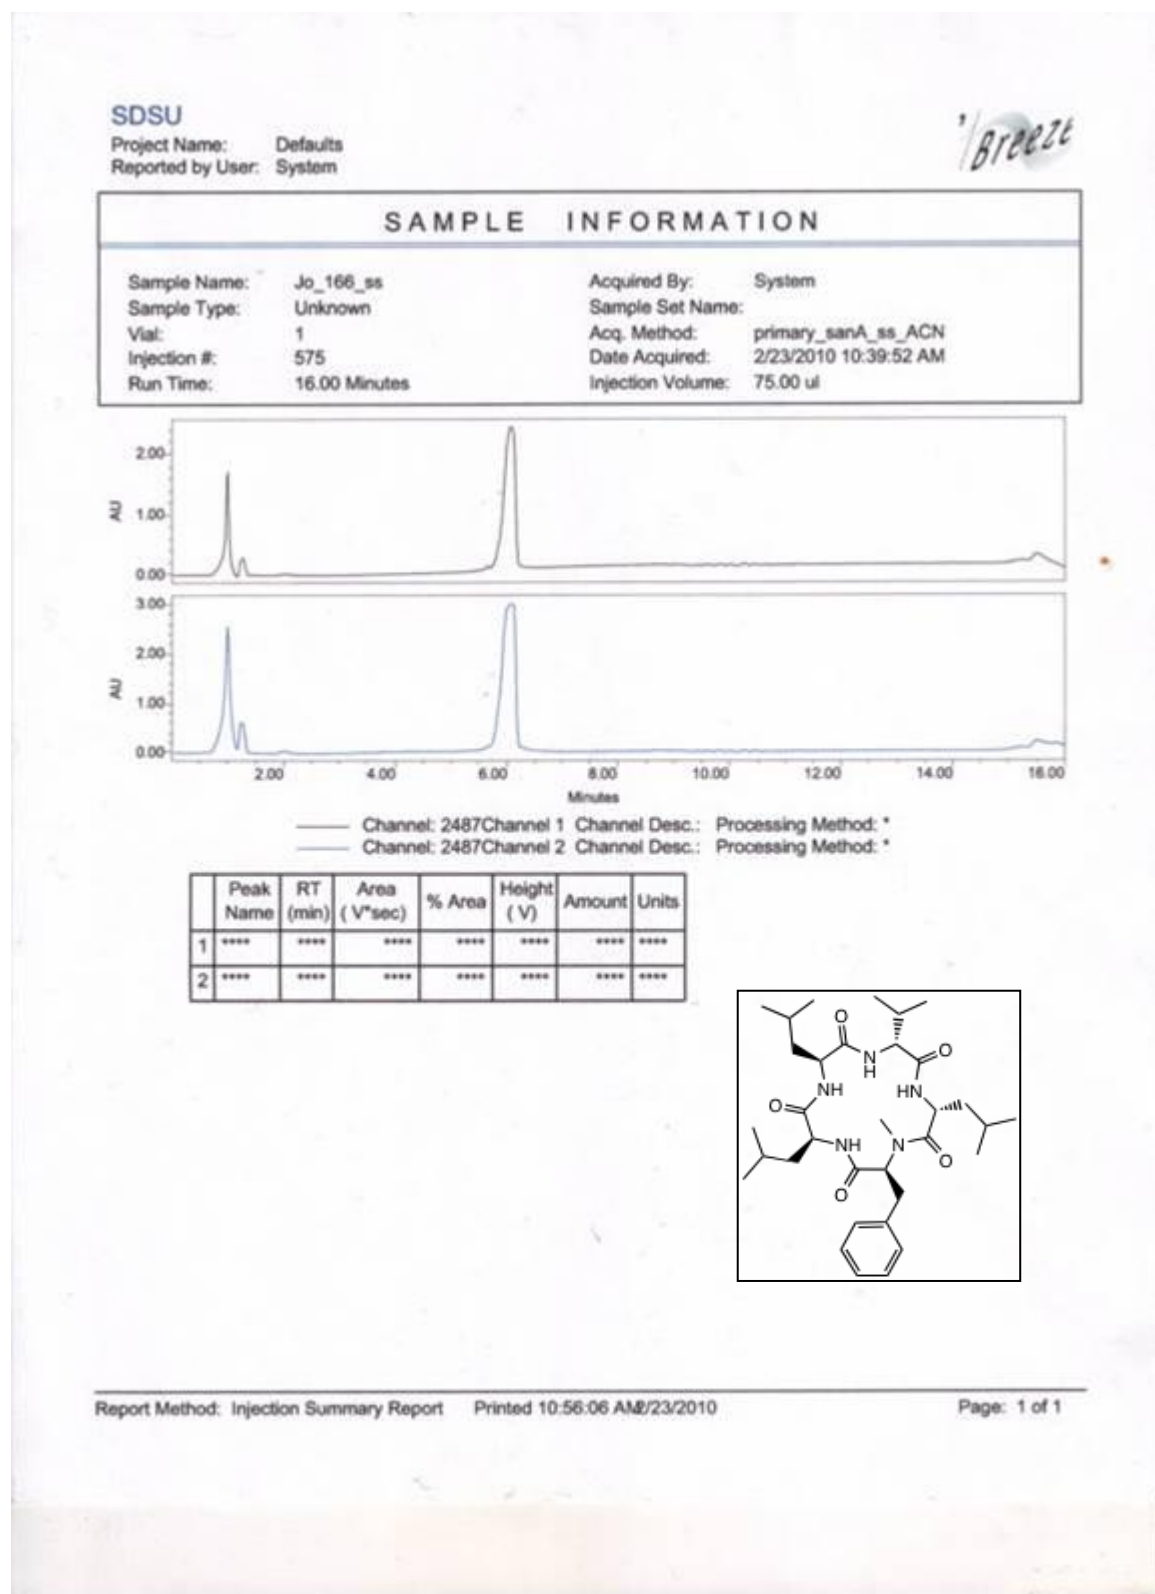Compound 4 HPLC Cyclized Pentapeptide *N*-Me-Phe-D-Leu-D-Val-Leu-Leu

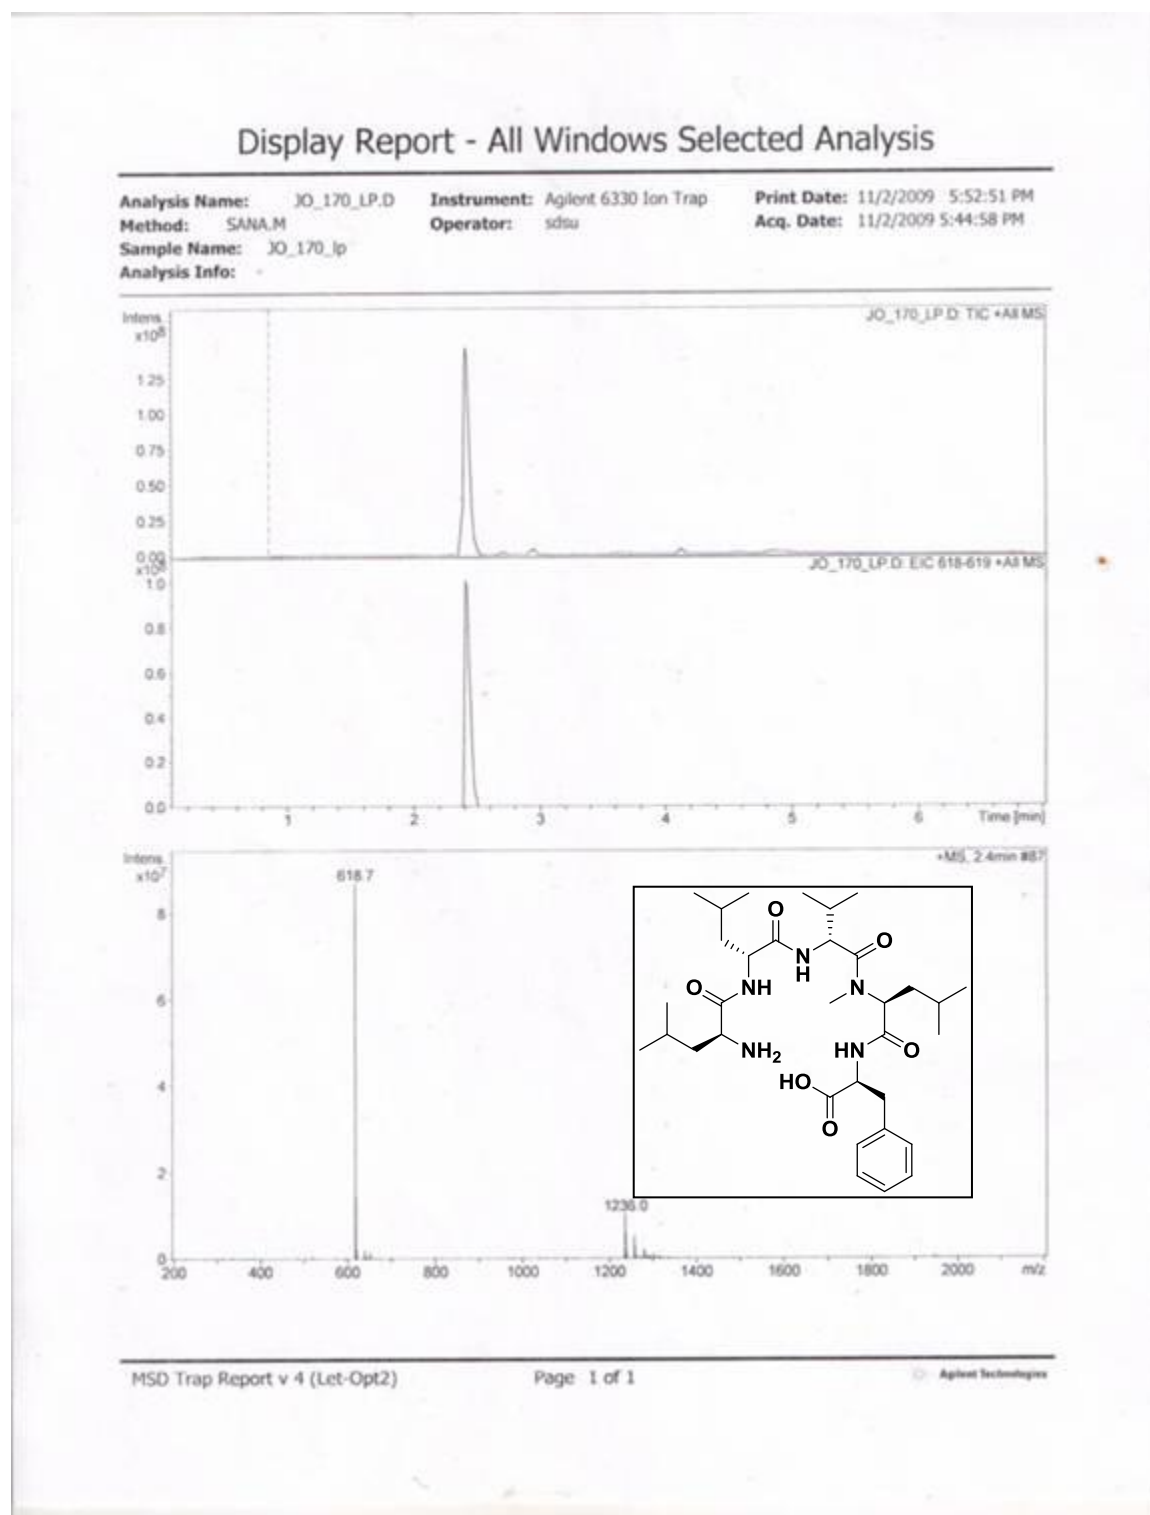

**Compound 5 LCMS Double Deprotected Linear Pentapeptide HO-Phe-N-Me-Leu-D-Val-D-Leu-Leu-NH<sub>2</sub> Leu (MW=618)**

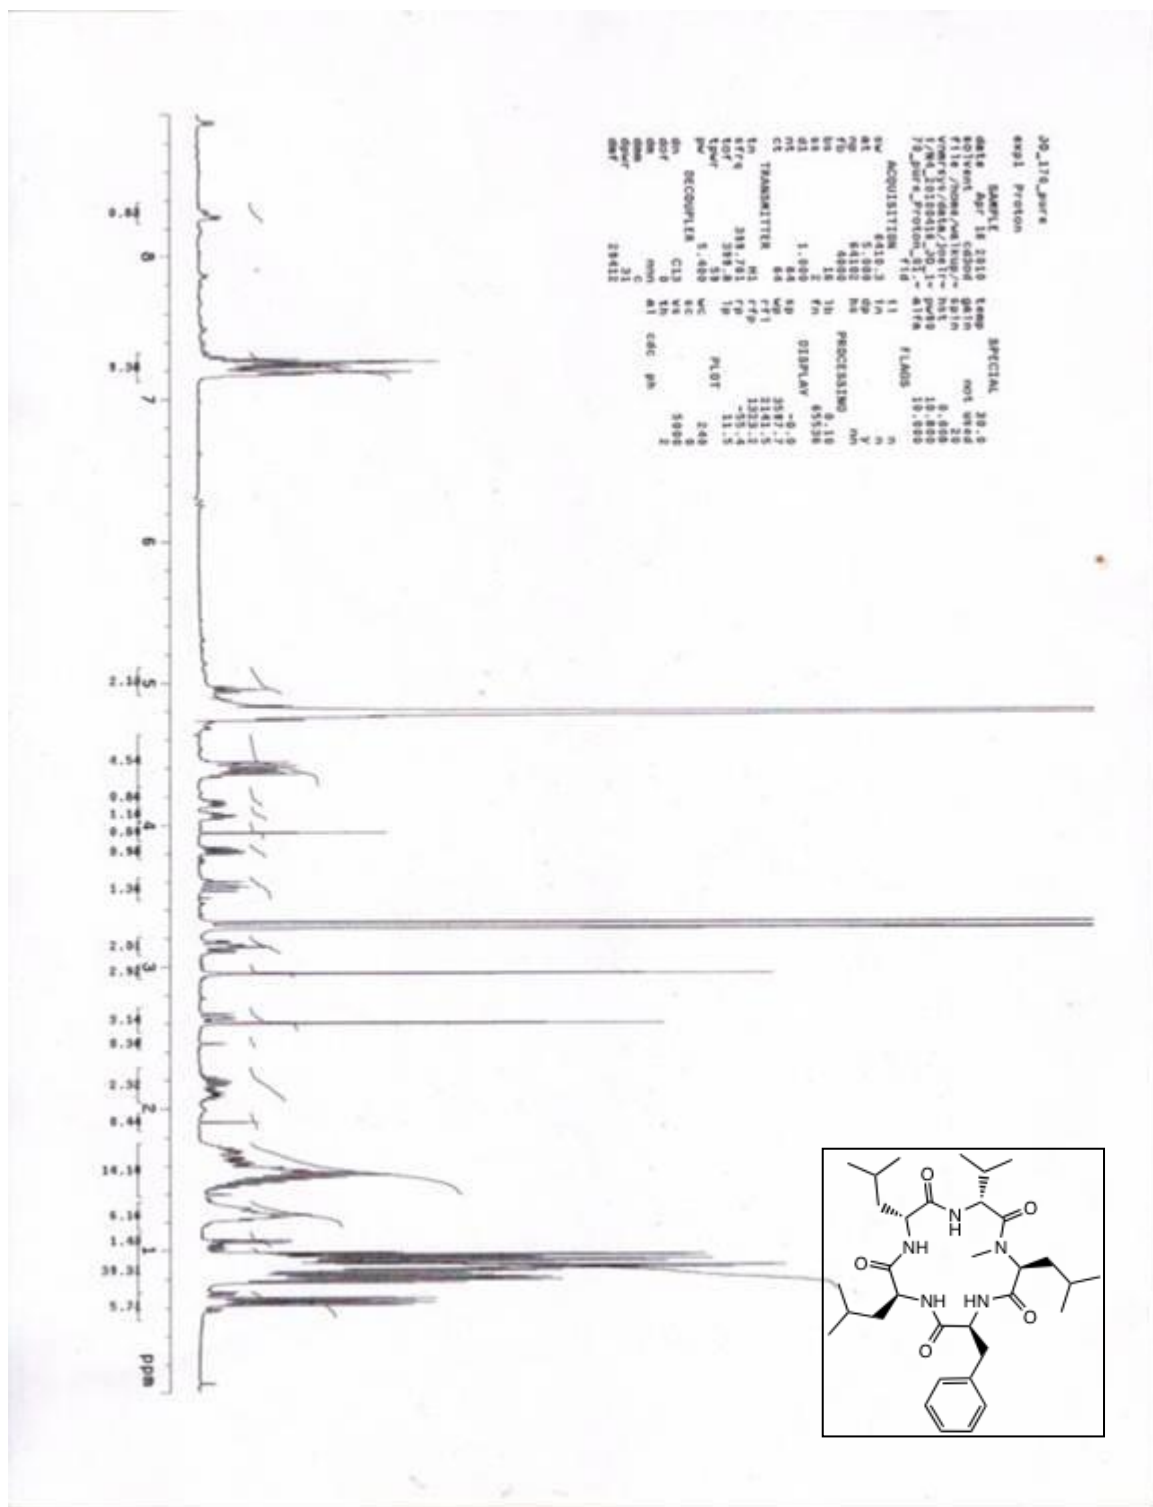

Compound 5 NMR Cyclized Pentapeptide Phe-N-Me-Leu-D-Val-D-Leu-Leu

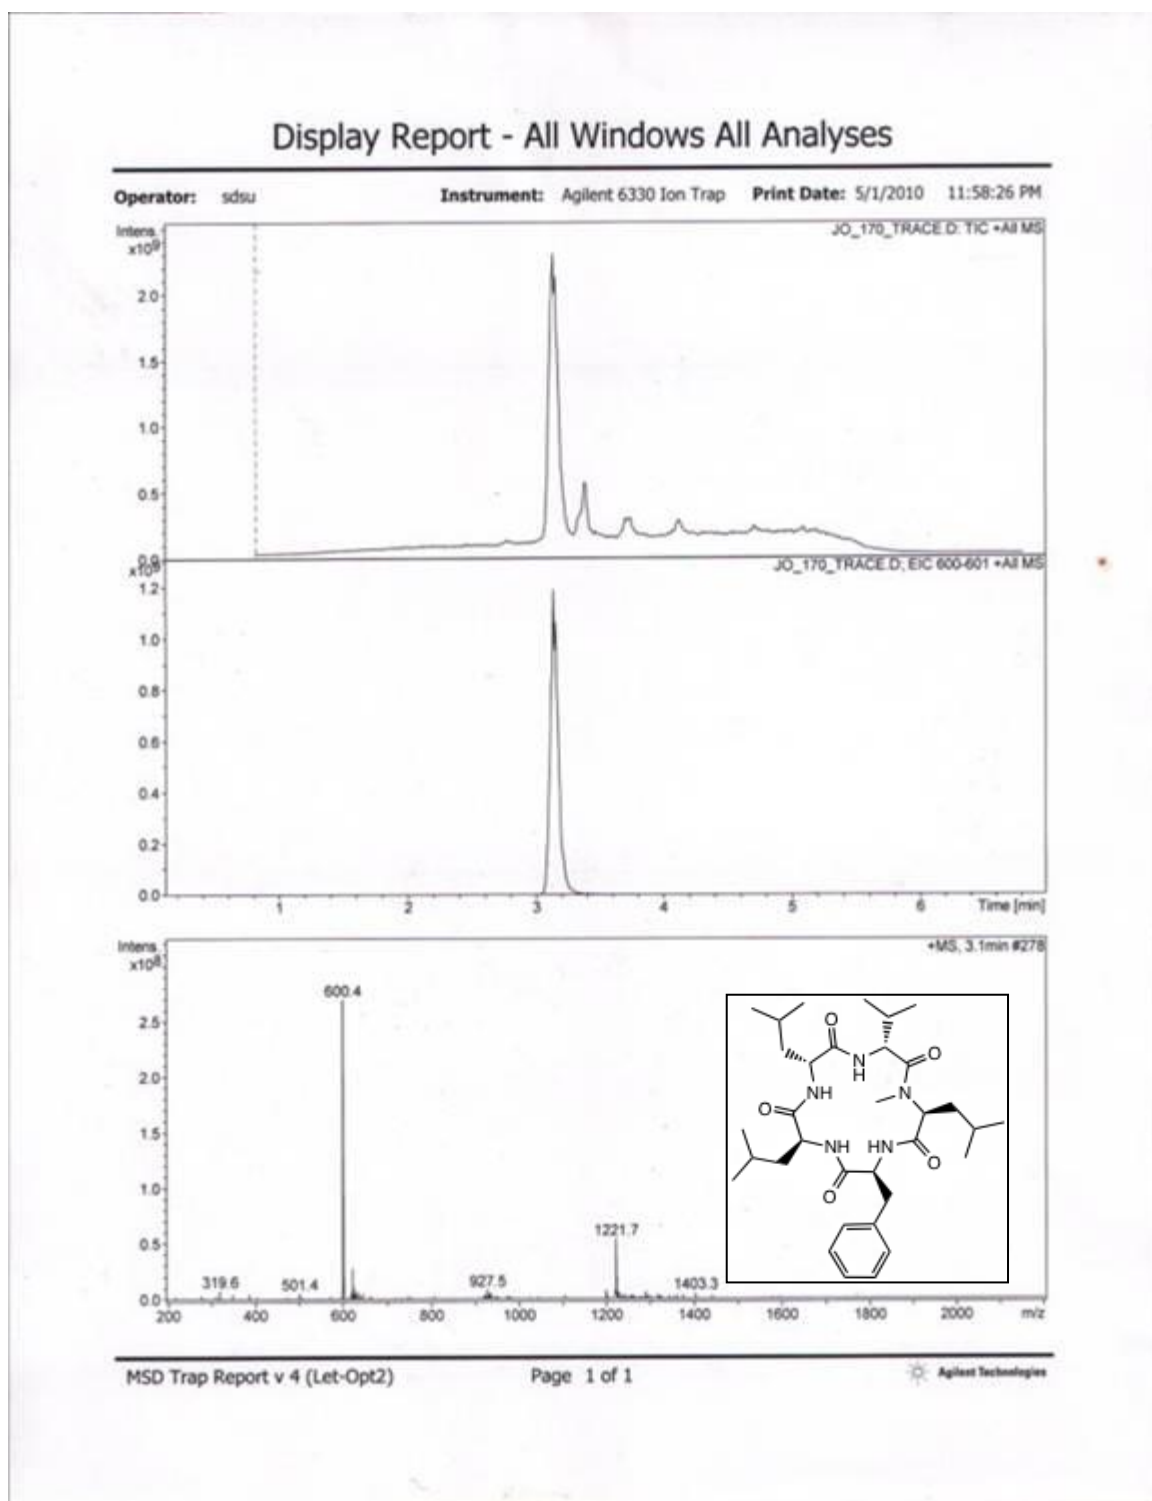

Compound 5 LCMS Cyclized Pentapeptide Phe-*N*-Me-Leu-*D*-Val-*D*-Leu-Leu (MW=600)

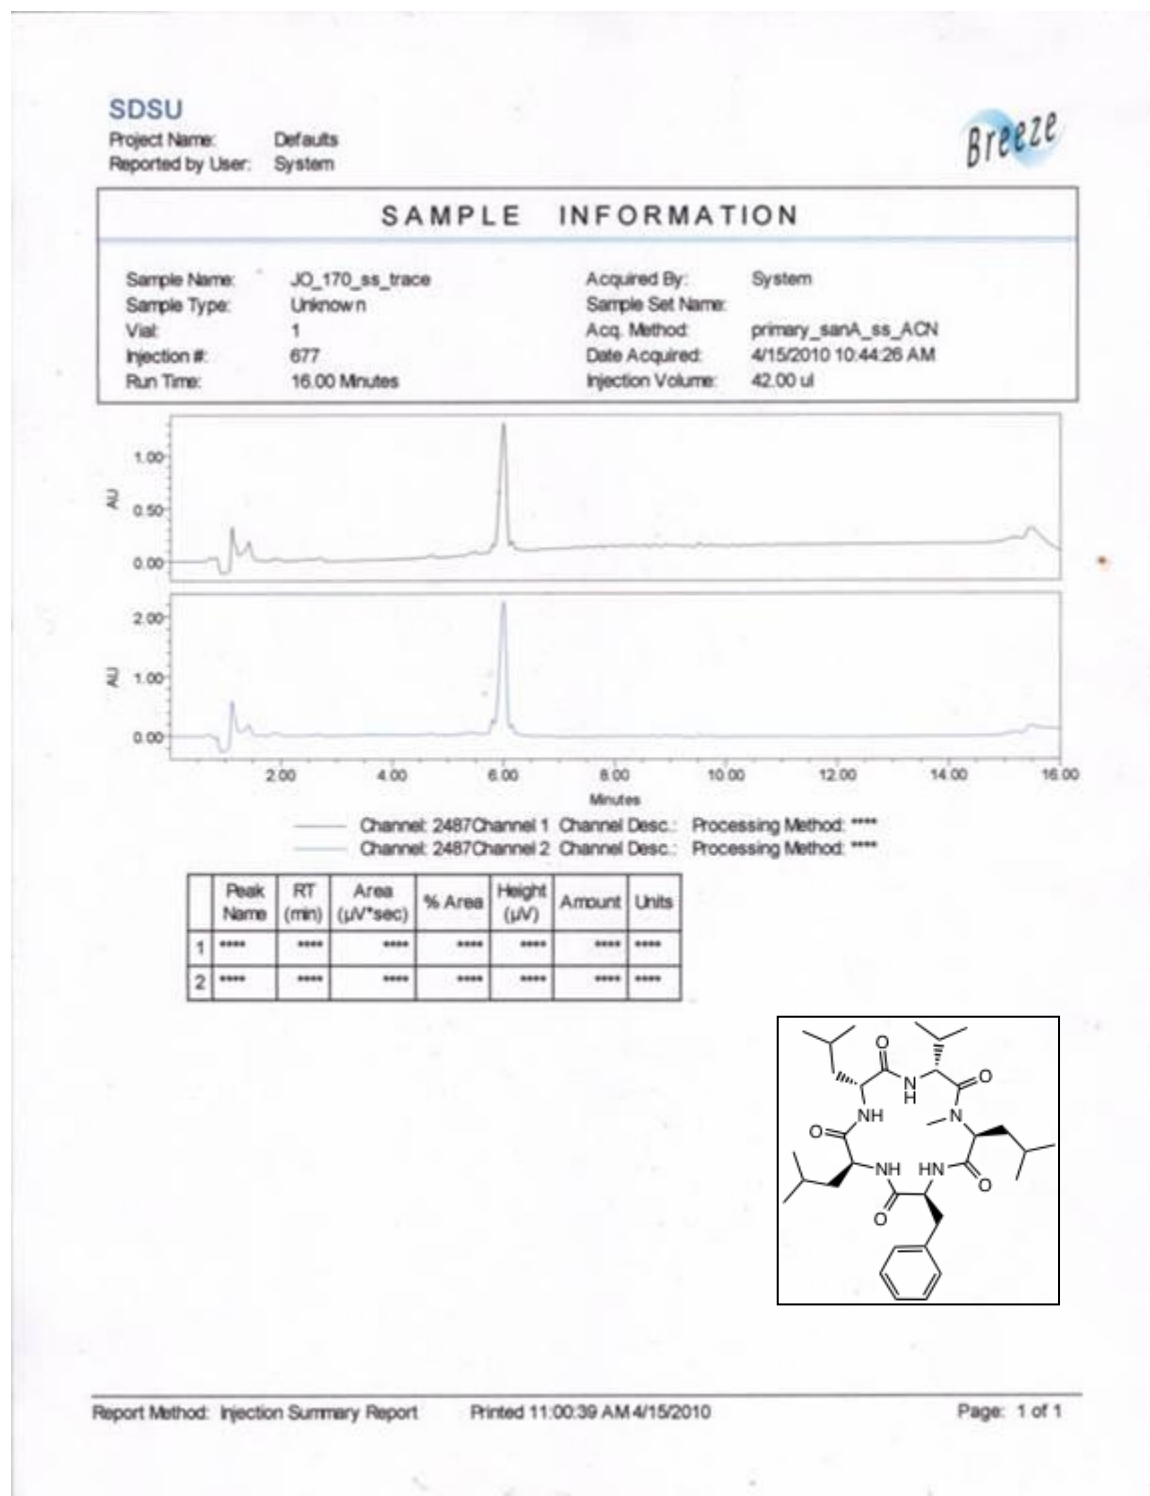

Compound 5 HPLC Cyclized Pentapeptide Phe-N-Me-Leu-D-Val-D-Leu-Leu

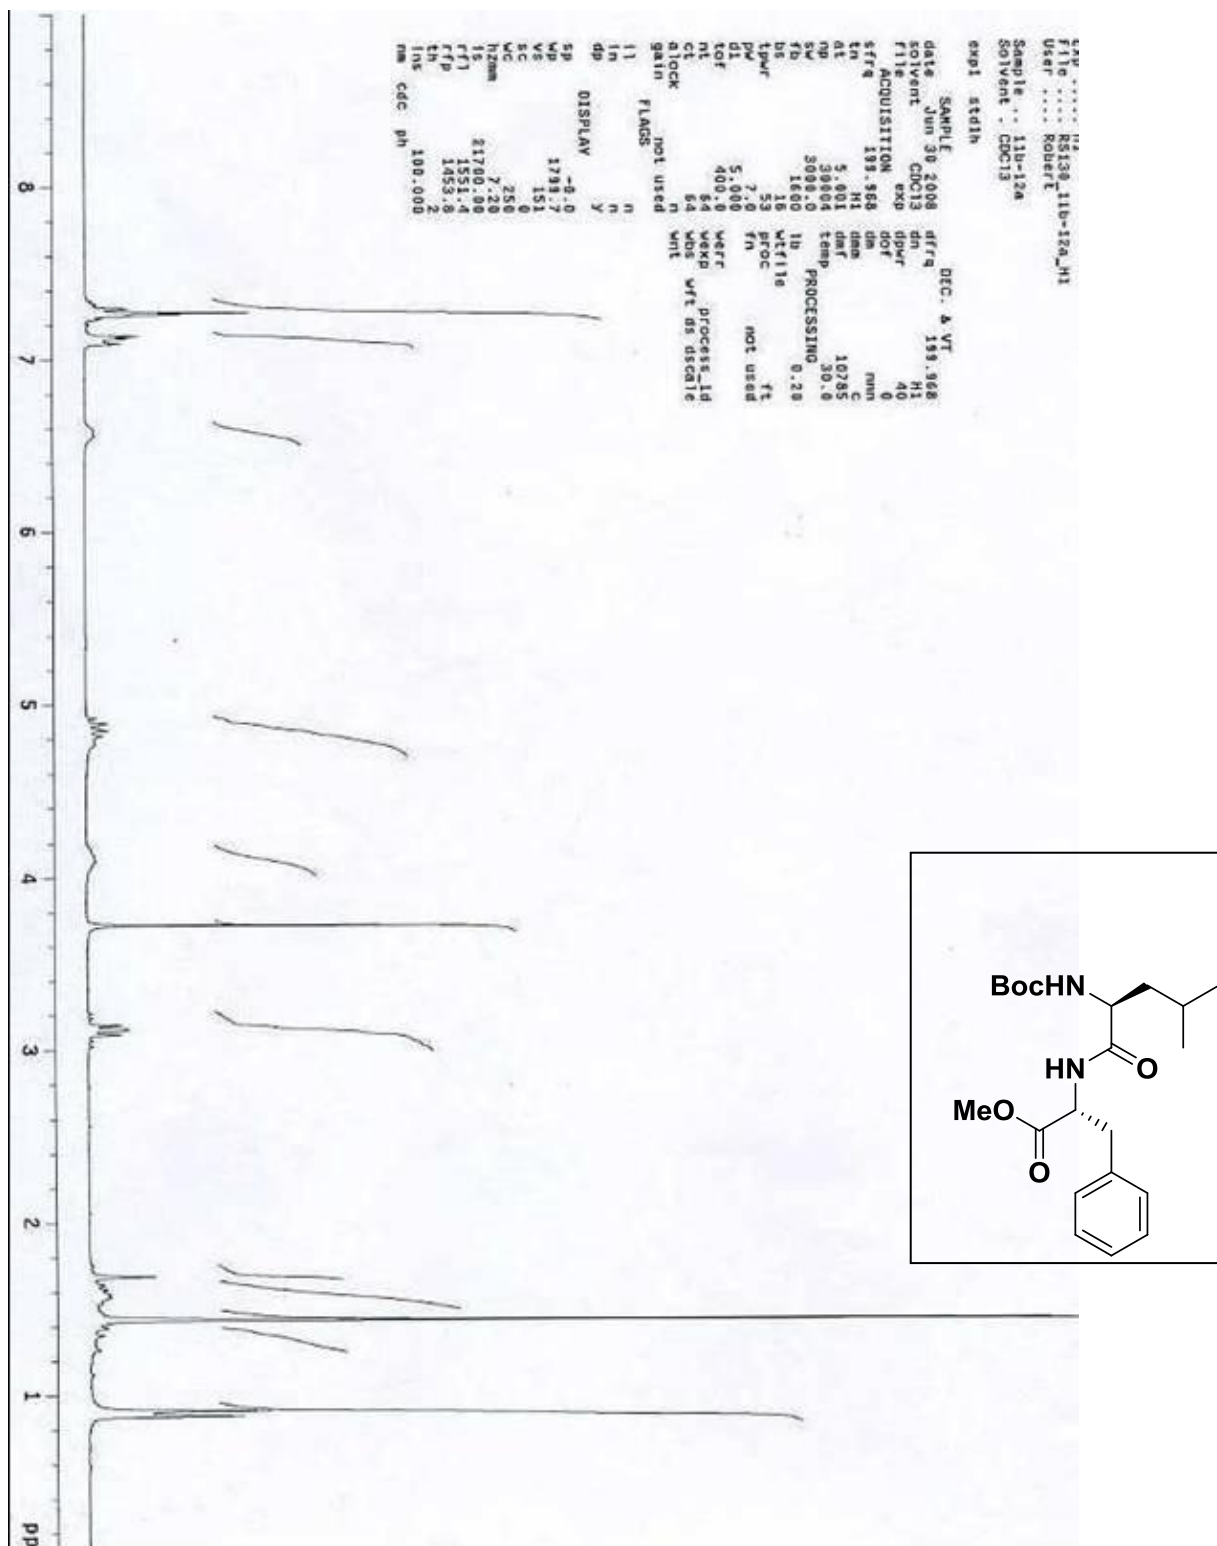

Compound 6 NMR Dipeptide MeO-D-Phe-Leu- NHBoc

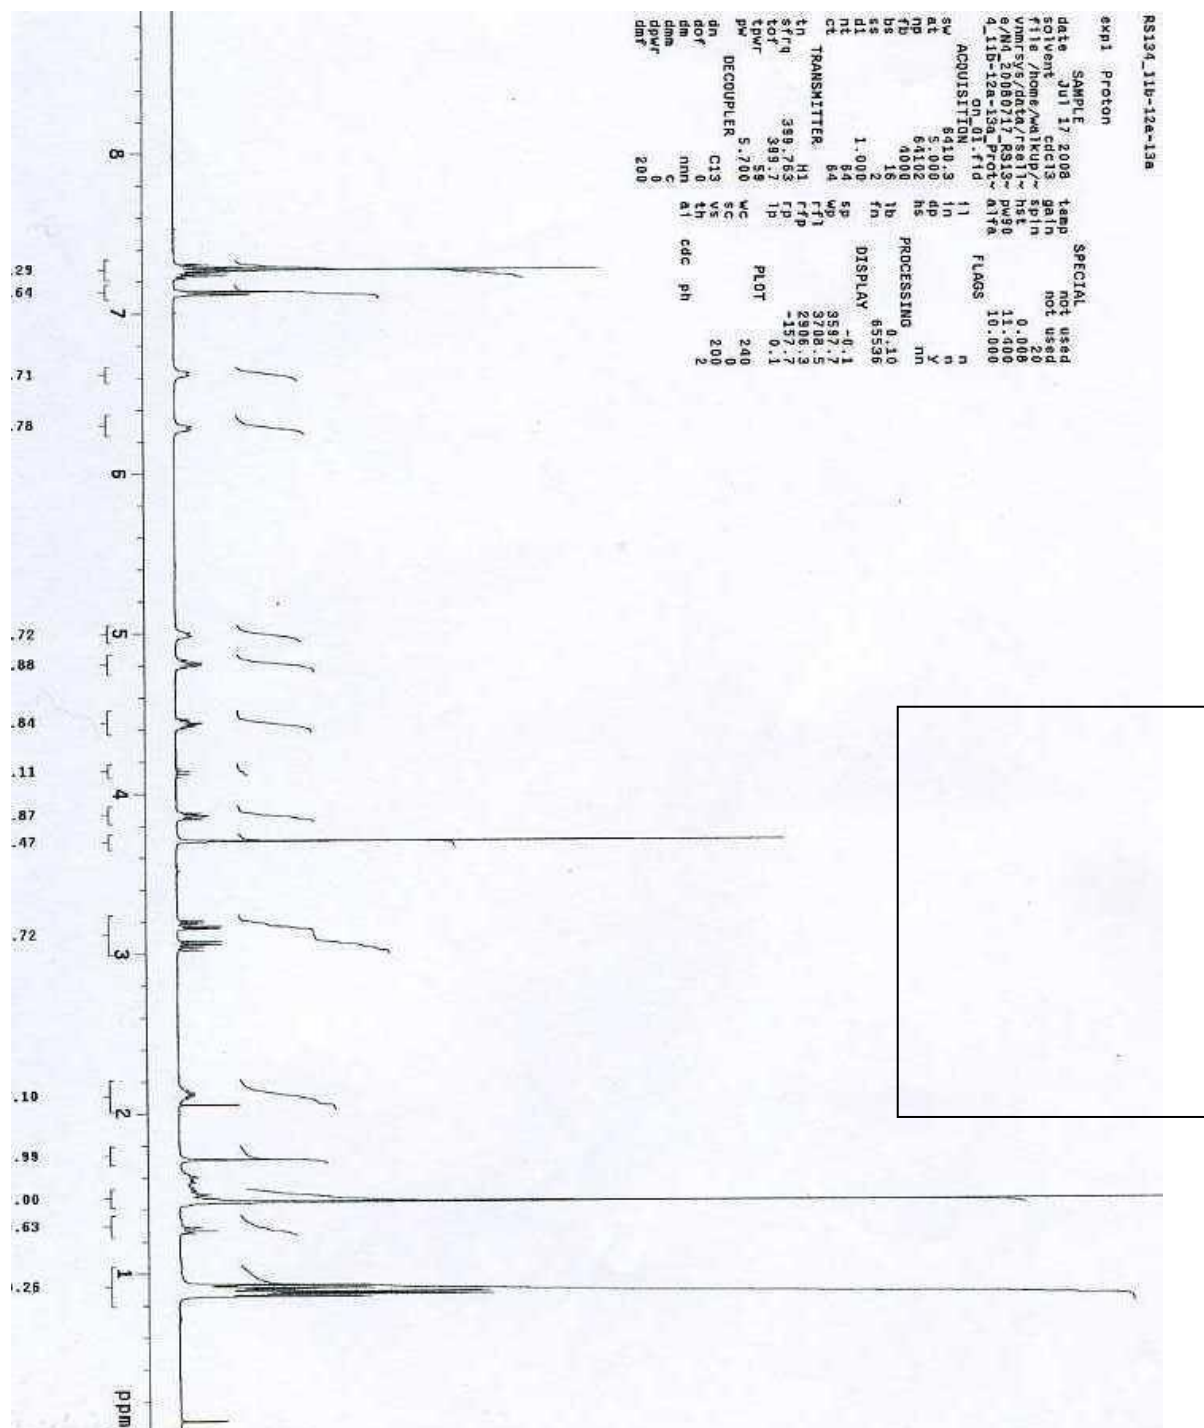

Compound 6 NMR Tripeptide MeO-D-Phe-Leu-Val-NHBoc



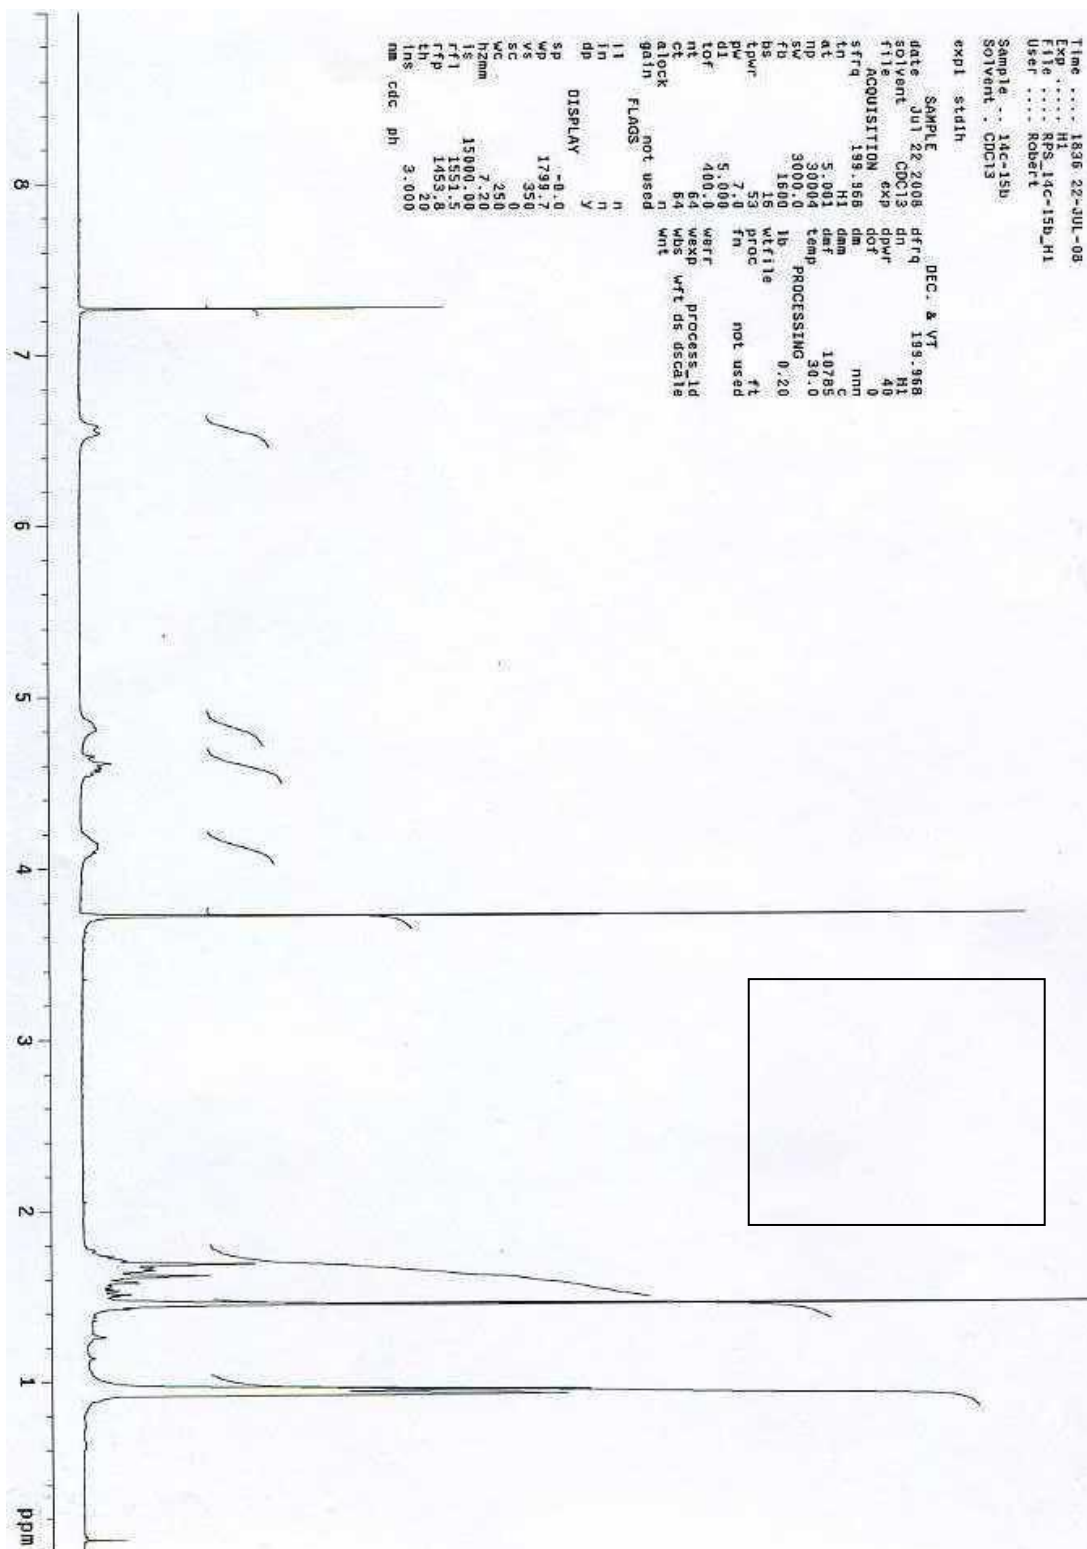

Compound 6 NMR Dipeptide MeO-Leu-D-Leu-NHBoc



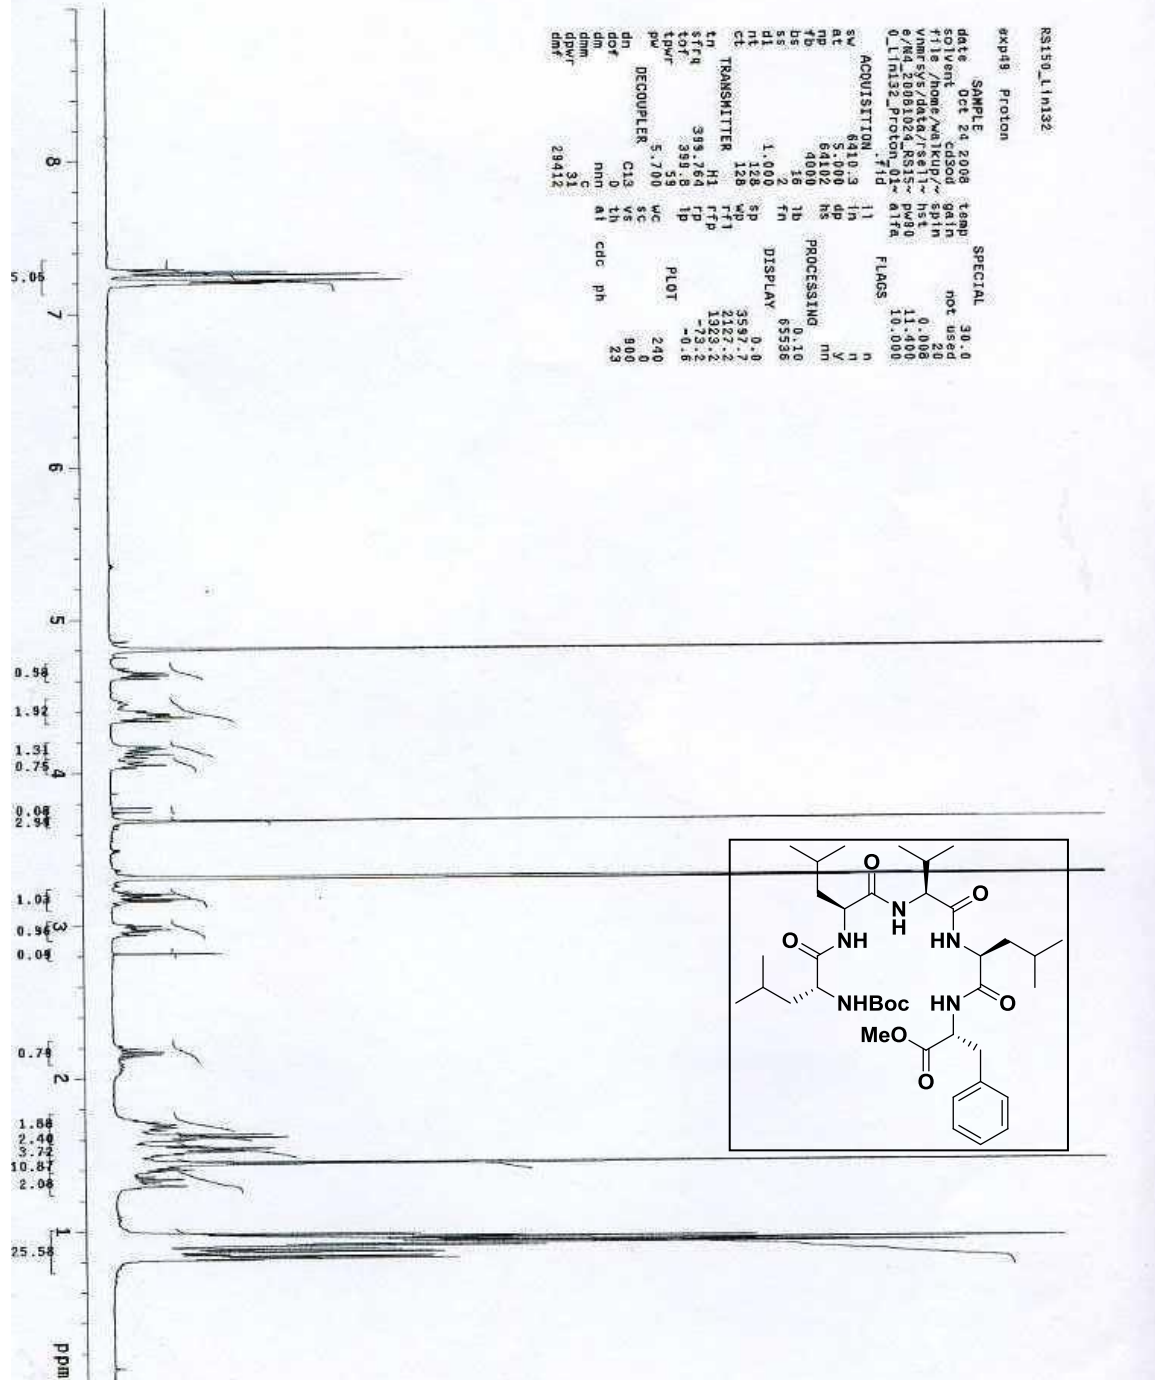

Compound 6 NMR Linear Pentapeptide MeO-D-Phe-Leu-Val-Leu-D-Leu-NHBoc

## Display Report - All Windows Selected Analysis

**Analysis Name:** RS150\_LIN132.D **Instrument:** Agilent 6330 Ion Trap **Print Date:** 12/19/2008 2:47:40 PM  
**Method:** SANA.M **Operator:** sdsu **Acq. Date:** 10/24/2008 4:37:39 PM  
**Sample Name:** RS150\_Lin132  
**Analysis Info:**

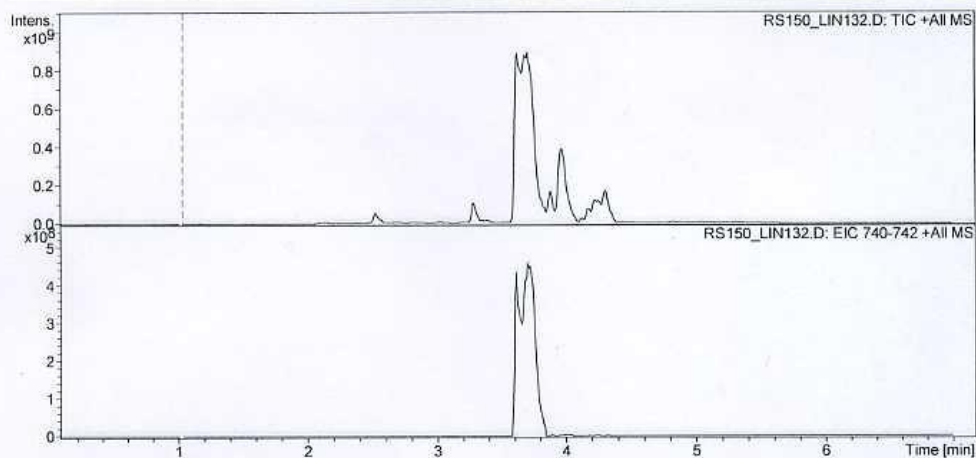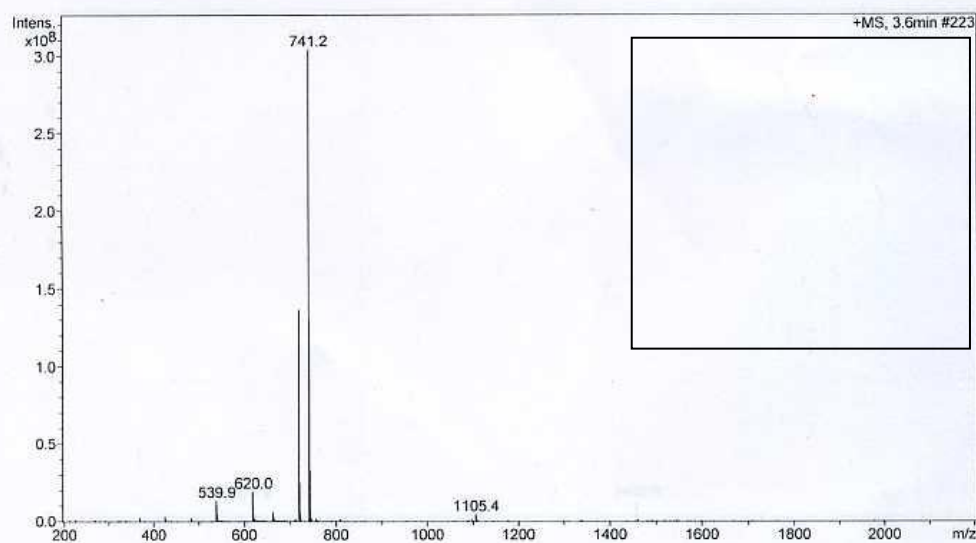

**Compound 6 LCMS Linear Pentapeptide MeO-D-Phe-Leu-Val-Leu-D-Leu-NHBoc (MW = 717.9)**

## Display Report - All Windows Selected Analysis

Analysis Name: RPS\_DD132.D Instrument: Agilent 6330 Ion Trap Print Date: 11/6/2008 3:44:40 AM  
Method: SANA.M Operator: sdsu Acq. Date: 11/6/2008 2:46:26 AM  
Sample Name: RPS\_DD132  
Analysis Info:

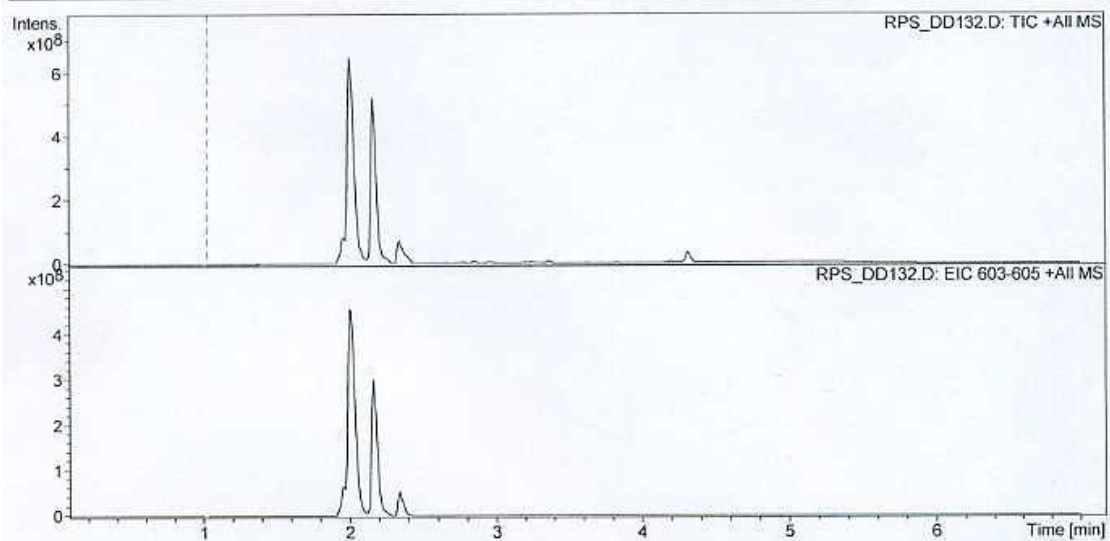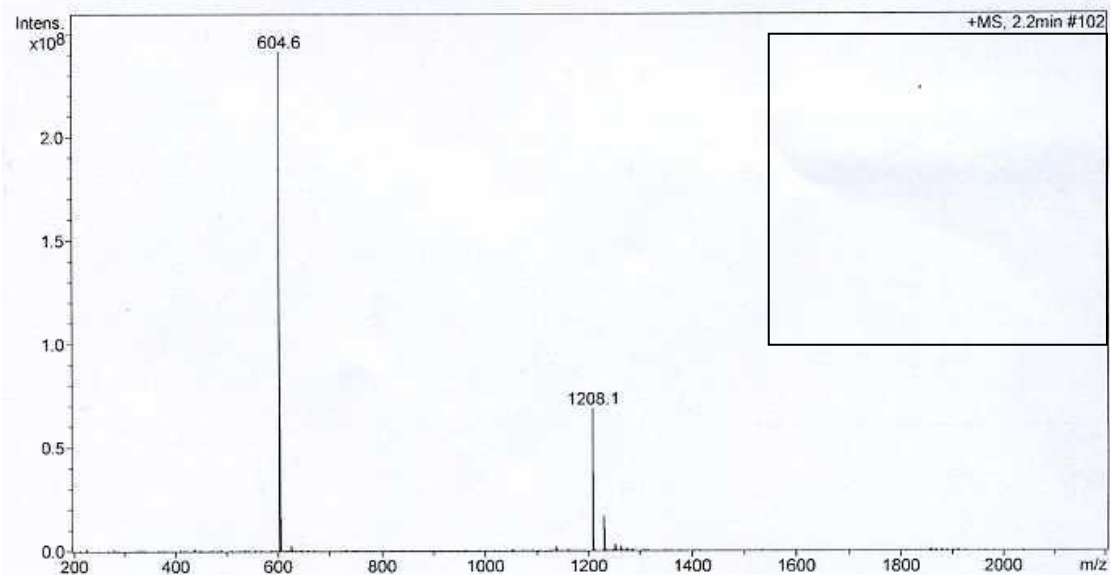

Compound 6 LCMS Double Deprotected Linear Pentapeptide HO-D-Phe-Leu-Val-Leu-D-Leu-NH<sub>2</sub> (MW = 603.8)

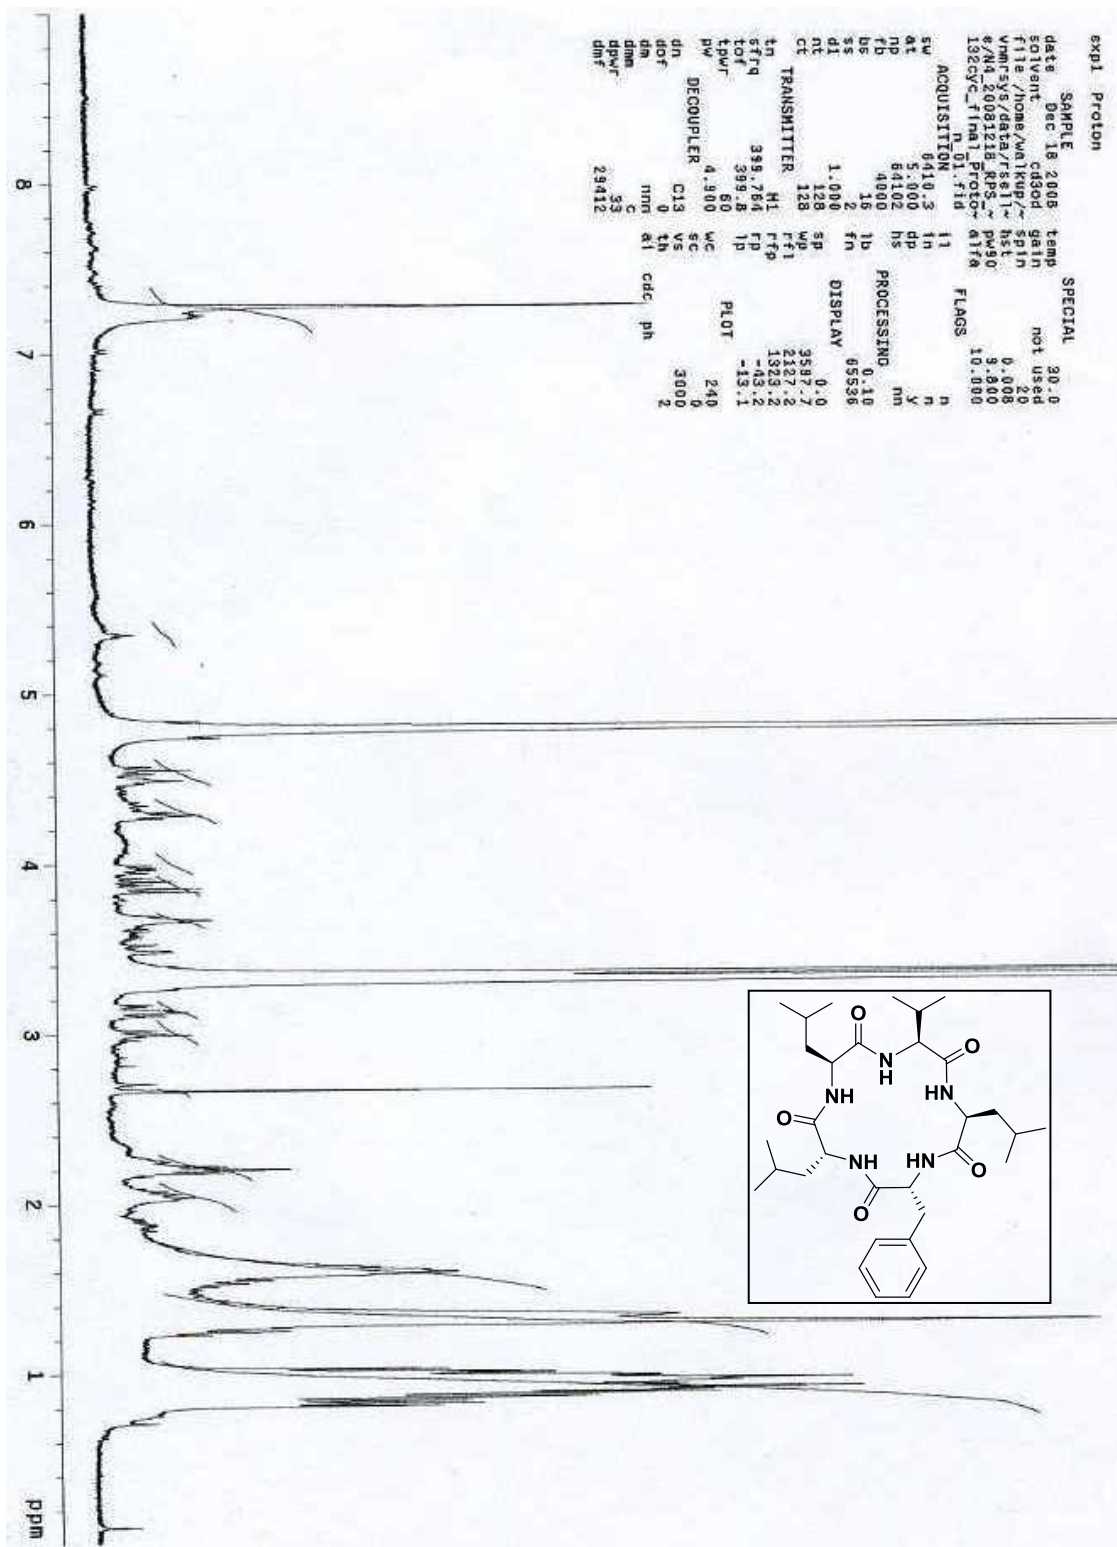

Compound 6 NMR Cyclized Pentapeptide D-Phe-Leu-Val-Leu-D-Leu

## Display Report - All Windows Selected Analysis

**Analysis Name:** RPS\_132CYC\_ME **Instrument:** Agilent 6330 Ion Trap **Print Date:** 12/19/2008 1:30:49 PM  
**Method:** SANA.M OH\_MEOH.D **Operator:** sdsu **Acq. Date:** 12/18/2008 1:41:41 PM  
**Sample Name:** RPS\_132cyc\_MeOH/MeOH  
**Analysis Info:**

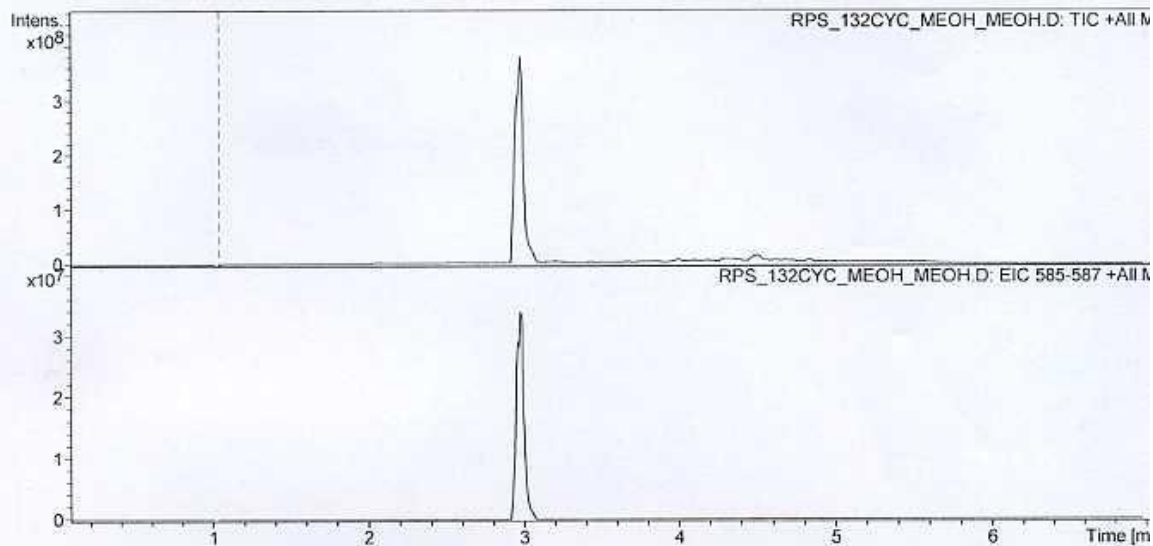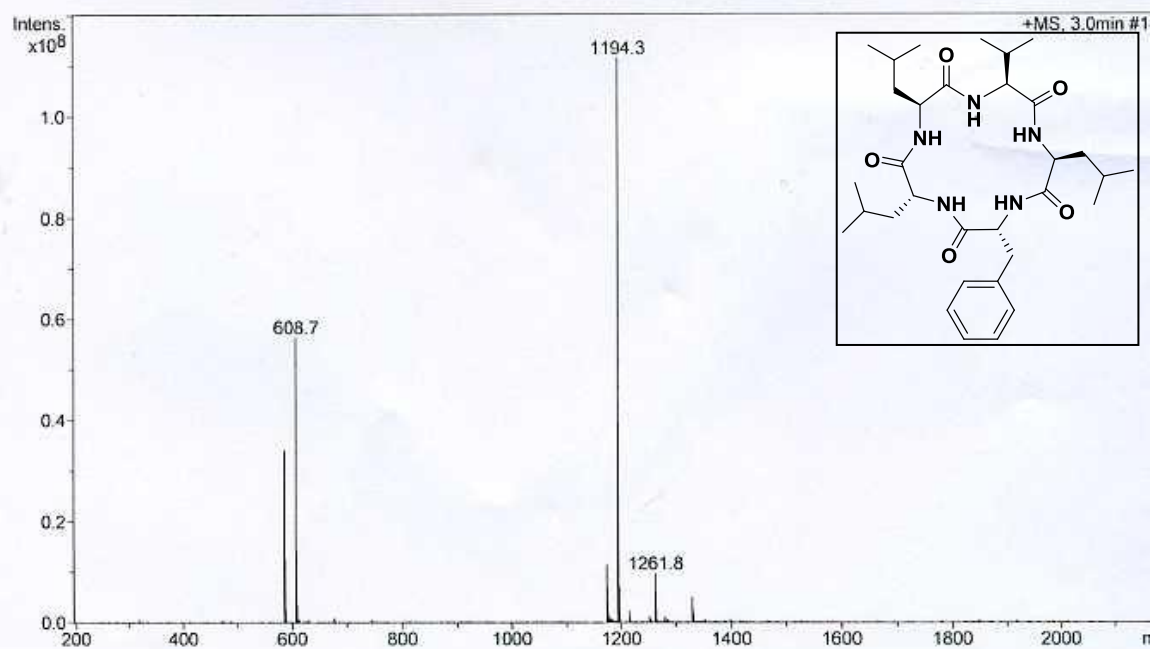

**Compound 6 LCMS Cyclized Pentapeptide D-Phe-Leu-Val-Leu-D-Leu  
(MW = 585.8)**



San Diego State University; Department of Chemis

Project Name: Defaults

Reported by User: shelli

Breeze

## SAMPLE INFORMATION

|              |               |                   |                       |
|--------------|---------------|-------------------|-----------------------|
| Sample Name: | RFS_132       | Acquired By:      | shelli                |
| Sample Type: | Unknown       | Sample Set Name:  |                       |
| Vial:        | 1             | Acq. Method:      | PrimarySanA_SS_new    |
| Injection #: | 37            | Date Acquired:    | 12/19/2008 4:28:05 AM |
| Run Time:    | 16.00 Minutes | Injection Volume: | 100.00 ul             |

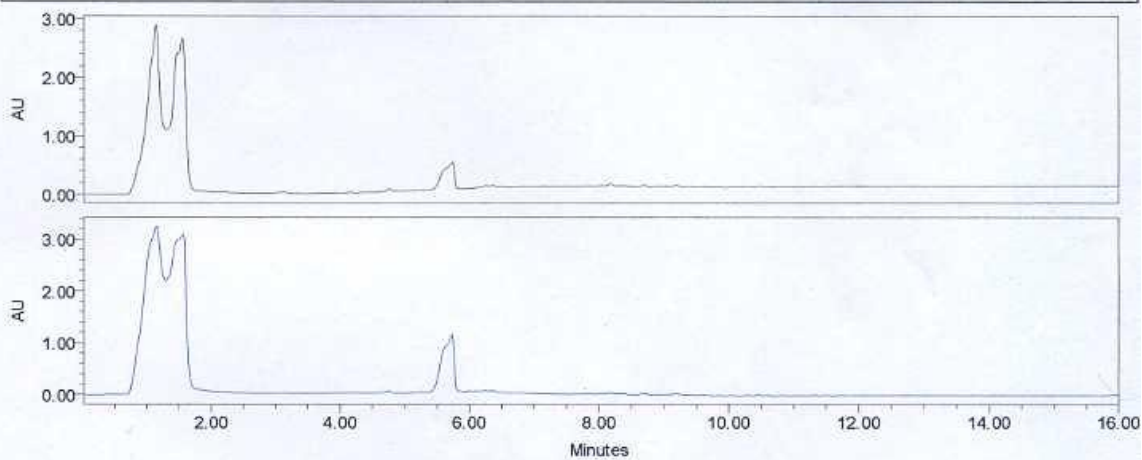

— Channel: 2487Channel 1 Channel Desc.: Processing Method: \*\*\*\*  
 — Channel: 2487Channel 2 Channel Desc.: Processing Method: \*\*\*\*

| Peak Name | RT (min) | Area (μV*sec) | % Area | Height (μV) | Amount | Units |
|-----------|----------|---------------|--------|-------------|--------|-------|
| 1 ****    | ****     | ****          | ****   | ****        | ****   | ****  |
| 2 ****    | ****     | ****          | ****   | ****        | ****   | ****  |

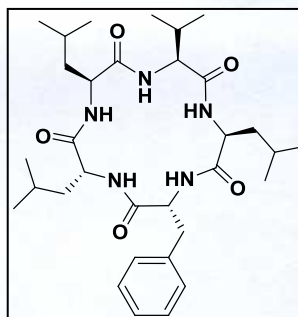

## Compound 6 HPLC Cyclized Pentapeptide D-Phe-Leu-Val-Leu-D-Leu

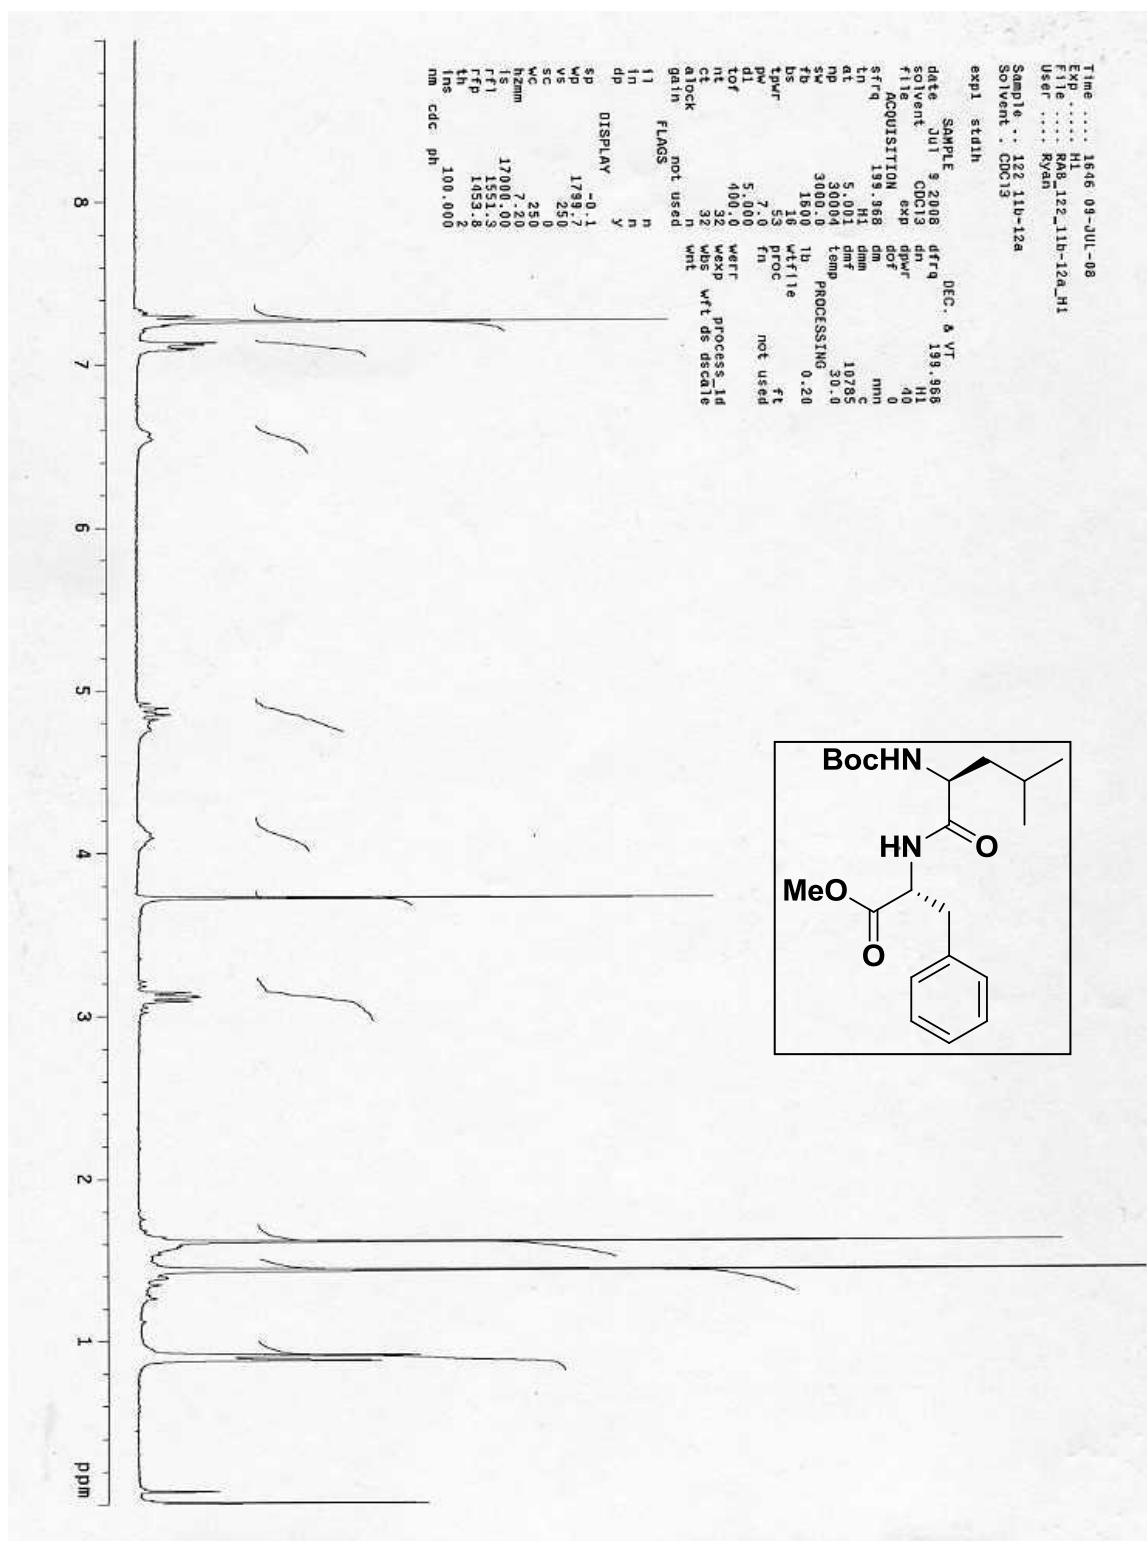

Compound 7 NMR Dipeptide MeO-D-Phe-Leu-NHBoc

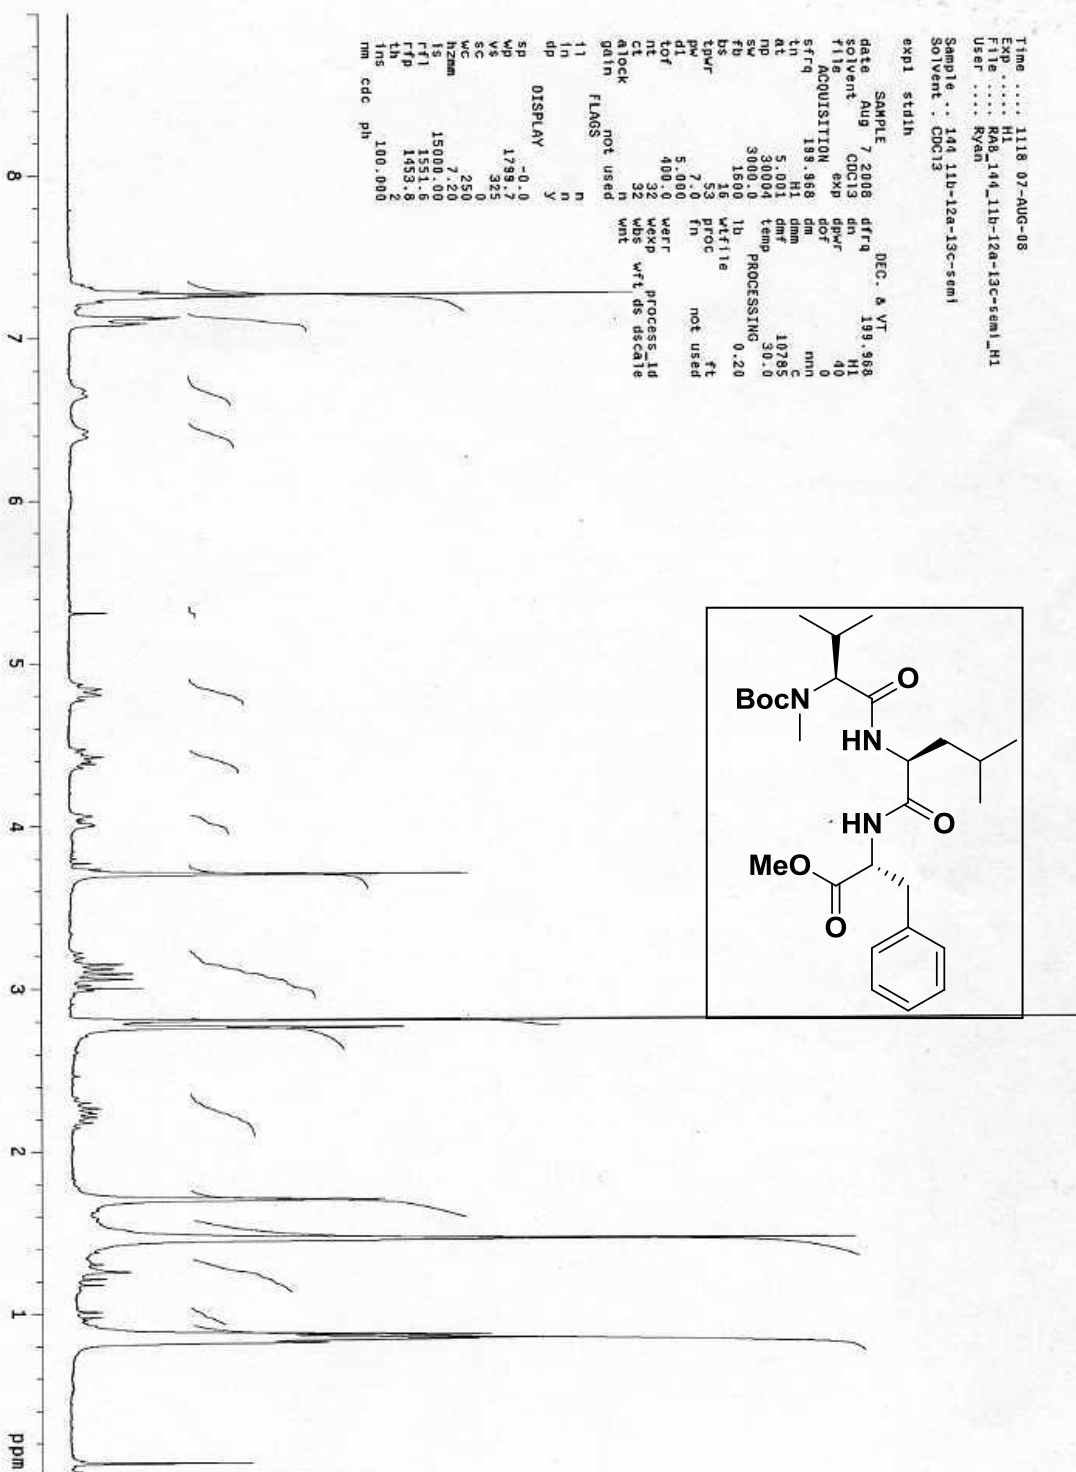

Compound 7 NMR Tripeptide MeO-D-Phe-Leu-N-Me-Val-Boc



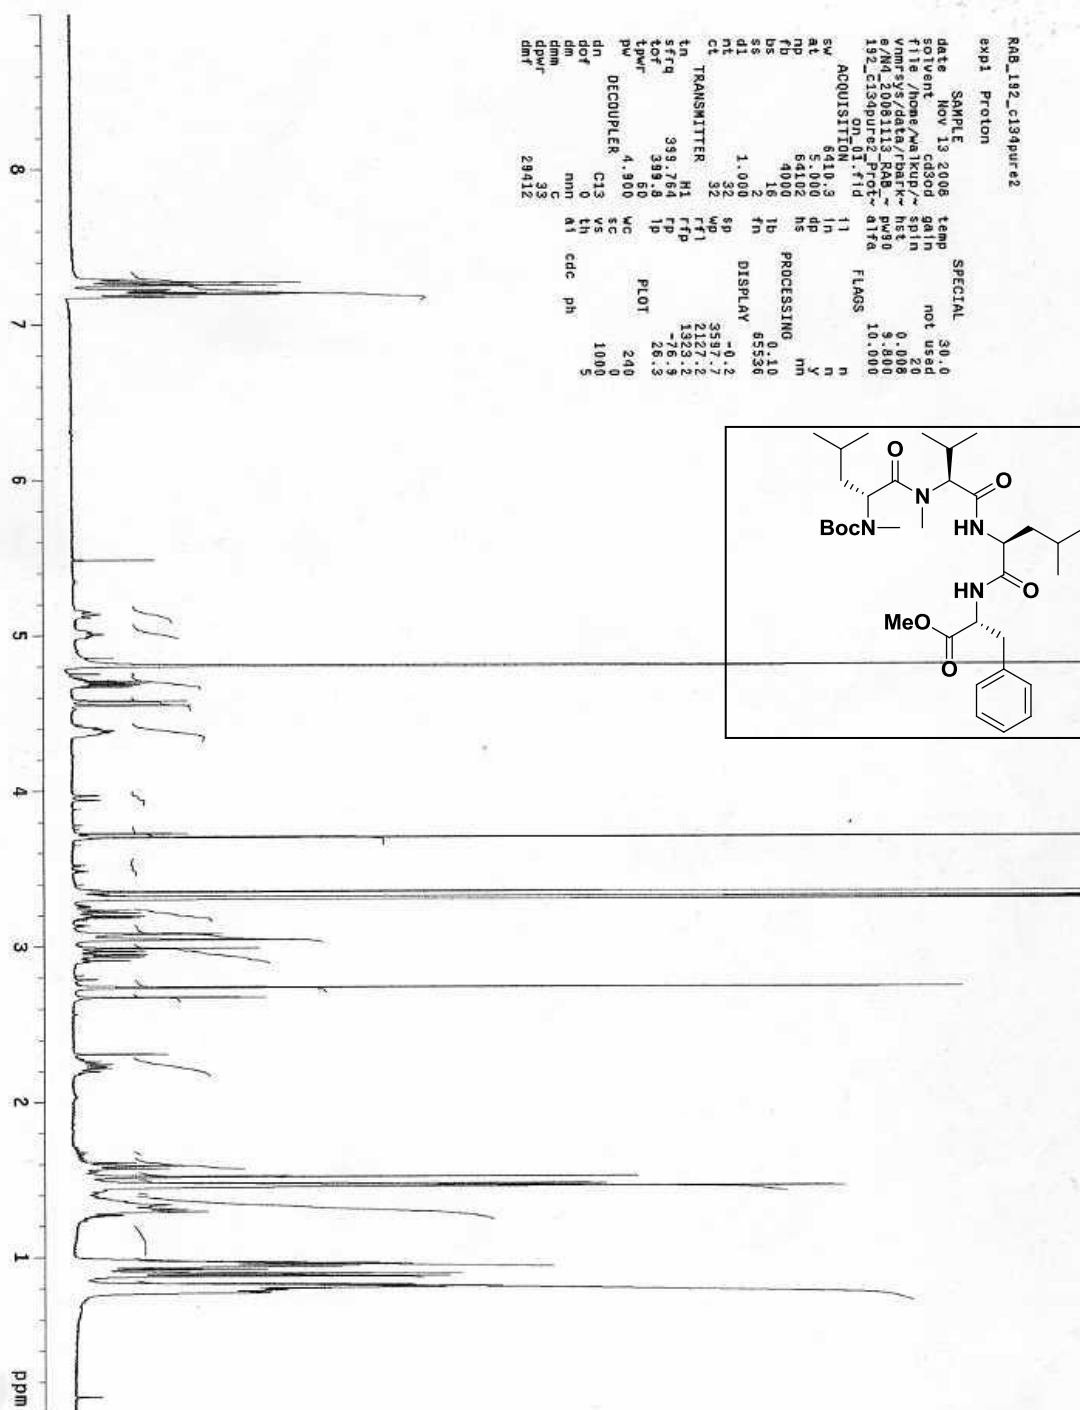

Compound 7 NMR Tetrapeptide MeO-D-Phe-Leu-N-Me-Val-N-Me-D-Leu-NBoc

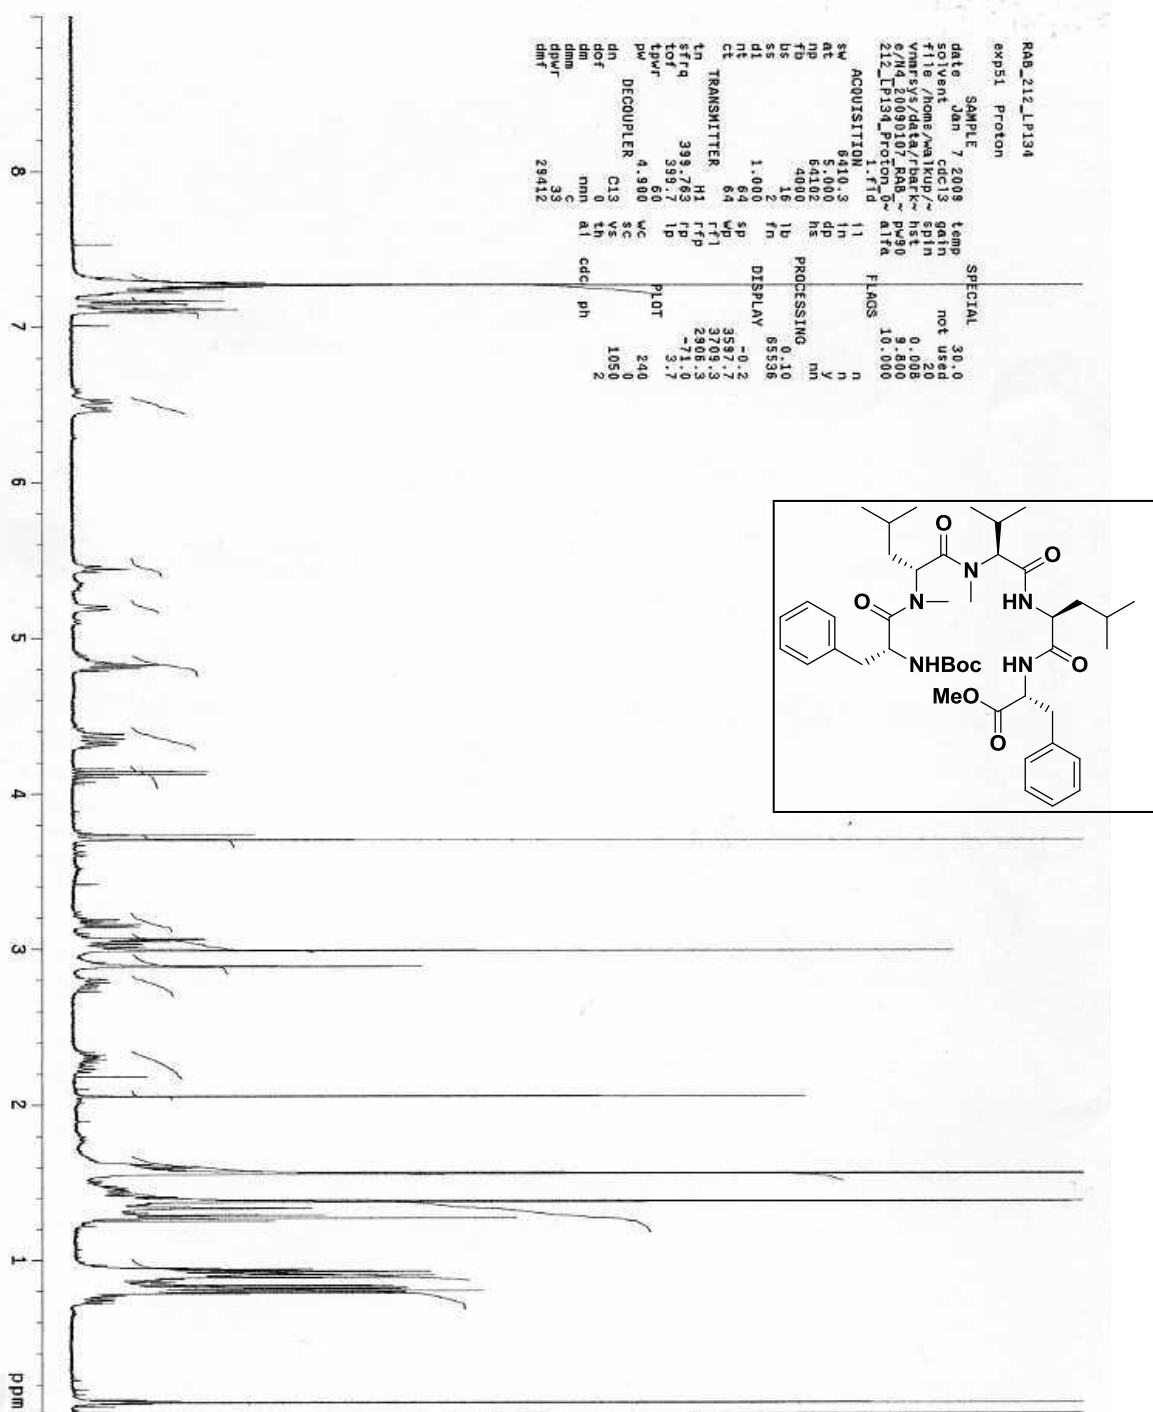

Compound 7 NMR Linear Pentapeptide MeO-D-Phe-Leu-N-Me-Val-N-Me-D-Leu-D-Phe-NHBoc

## Display Report - All Windows Selected Analysis

**Analysis Name:** RAB\_216\_LPDD1 **Instrument:** Agilent 6330 Ion Trap **Print Date:** 1/12/2009 12:28:42 PM  
**Method:** SANA.M 34.D **Operator:** sdsu **Acq. Date:** 1/12/2009 11:54:32 AM  
**Sample Name:** RAB\_216\_LPdd134  
**Analysis Info:**

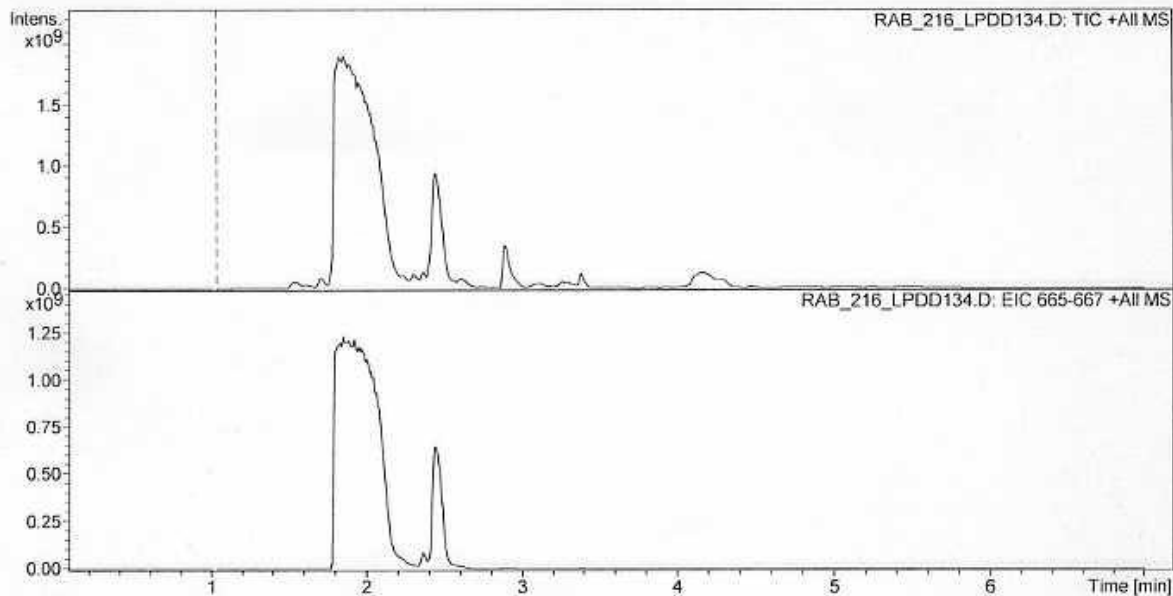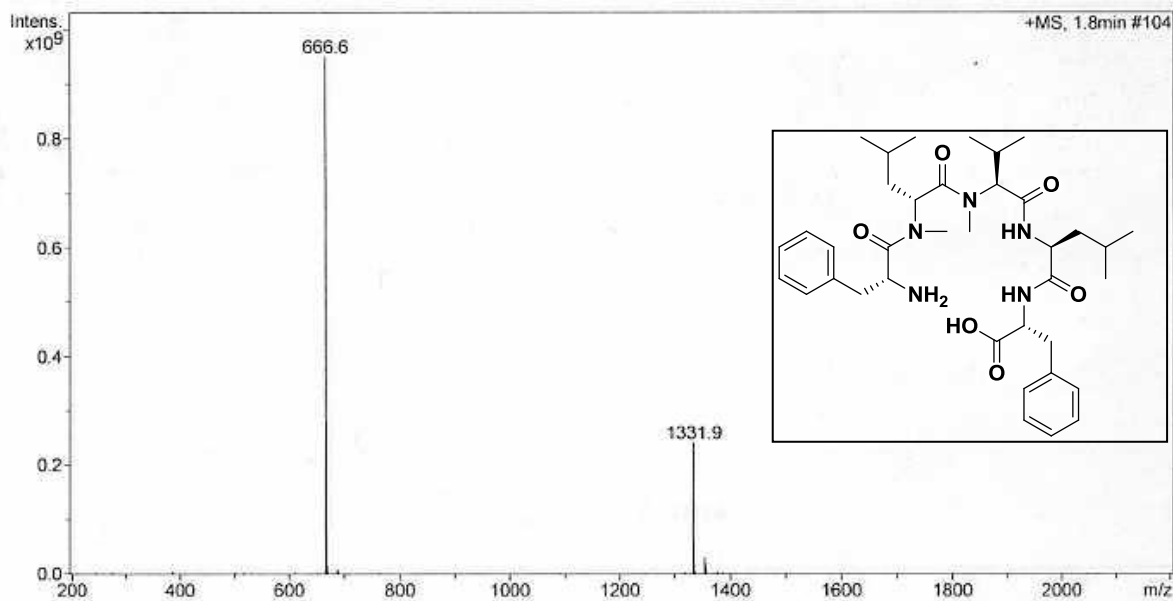

**Compound 7 LCMS Double Deprotected Pentapeptide HO-D-Phe-Leu-N-Me-Val-N-Me-D-Leu-D-Phe-NH<sub>2</sub> (MW=665.86)**

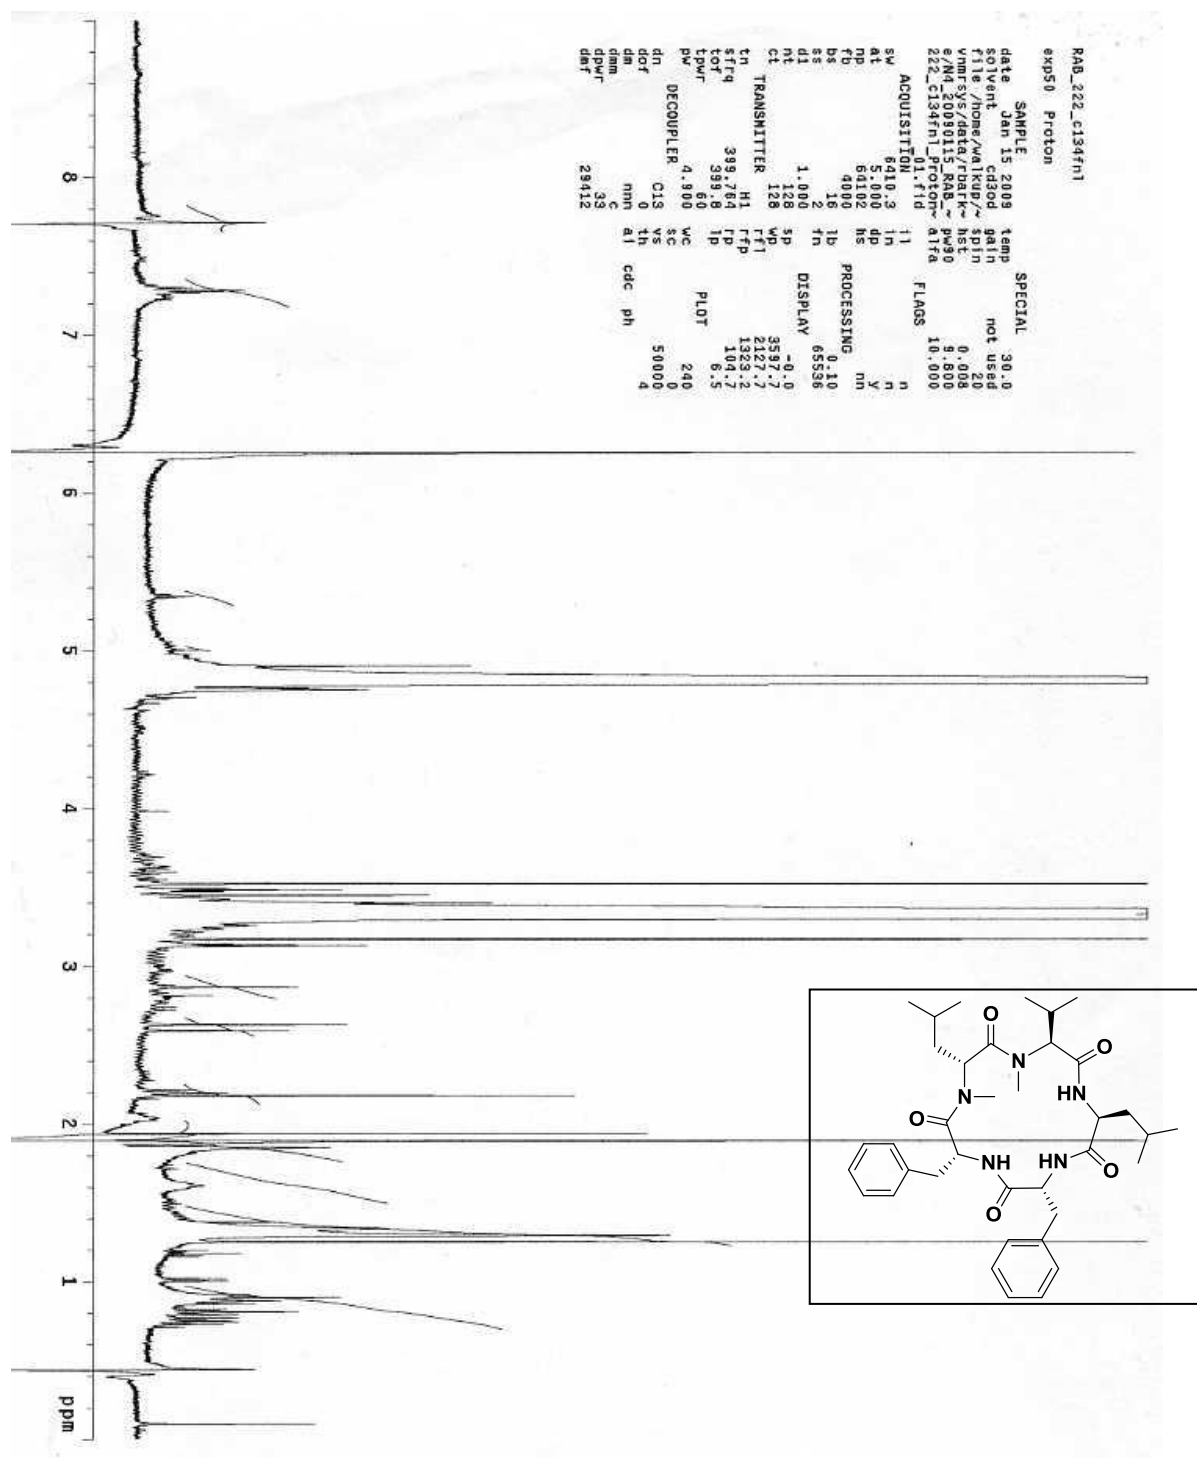

Compound 7 NMR Cyclized Pentapeptide D-Phe-Leu-N-Me-Val-N-Me-D-Leu-D-Phe

## Display Report - All Windows Selected Analysis

Analysis Name: RAB\_C134FNL.D Instrument: Agilent 6330 Ion Trap Print Date: 1/15/2009 2:18:22 PM  
Method: SANA.M Operator: sdsu Acq. Date: 1/15/2009 2:09:31 PM  
Sample Name: RAB\_c134fni  
Analysis Info:

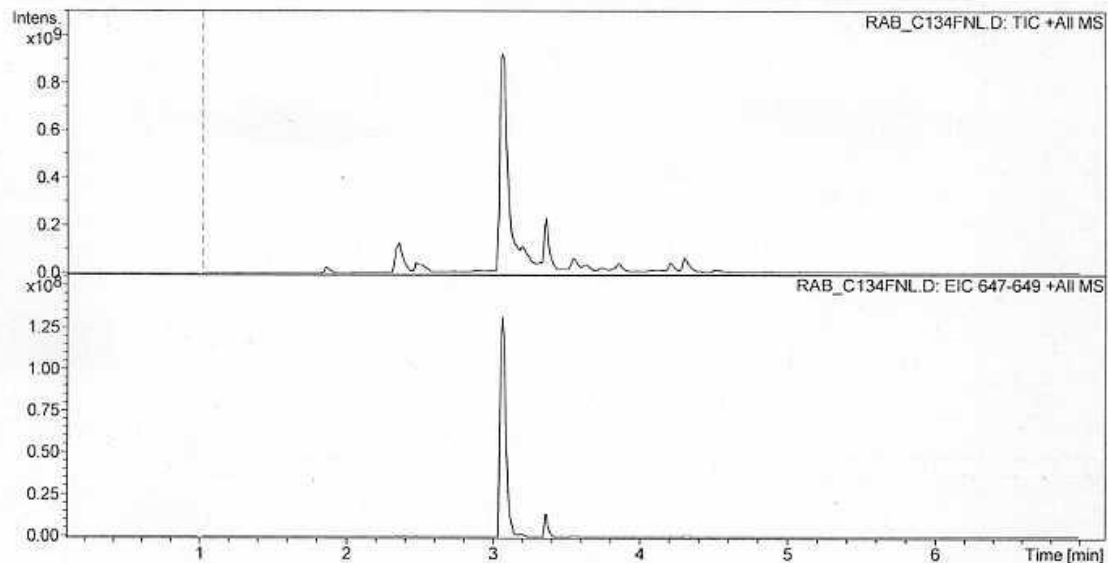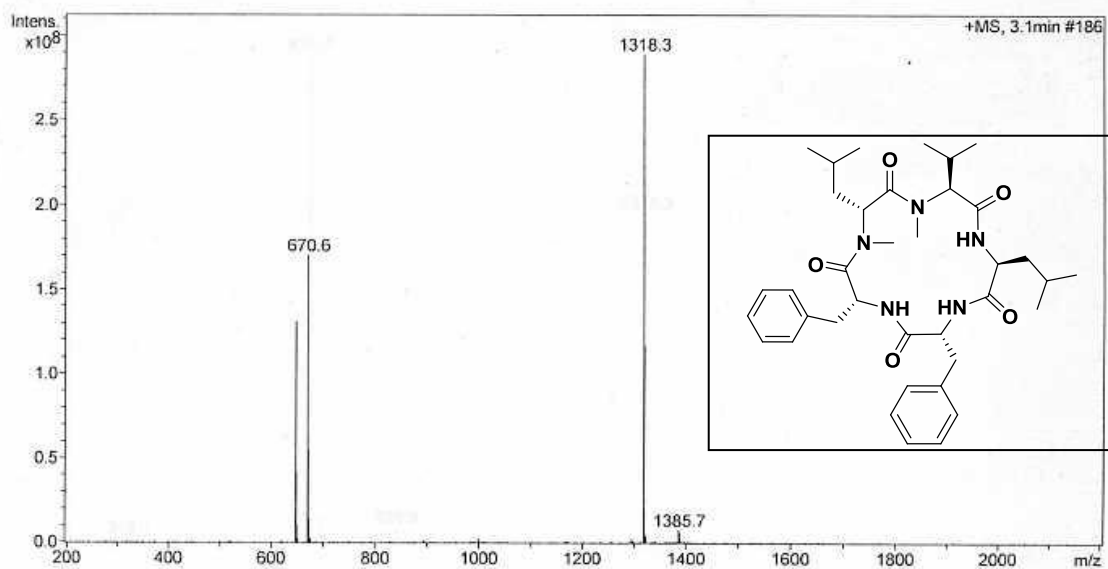

**Compound 7 LCMS Cyclized Pentapeptide D-Phe-Leu-N-Me-Val-N-Me-D-Leu-D-Phe (MW=647.8)**

San Diego State University; Department of Chemis

Project Name: Defaults

Reported by User: shelli

Breeze

## SAMPLE INFORMATION

Sample Name: RAB\_c134fml  
 Sample Type: Unknown  
 Vial: 1  
 Injection #: 5  
 Run Time: 16.00 Minutes

Acquired By: shelli  
 Sample Set Name:  
 Acq. Method: PrimarySanA\_SS\_new  
 Date Acquired: 1/16/2009 12:51:27 AM  
 Injection Volume: 50.00 ul

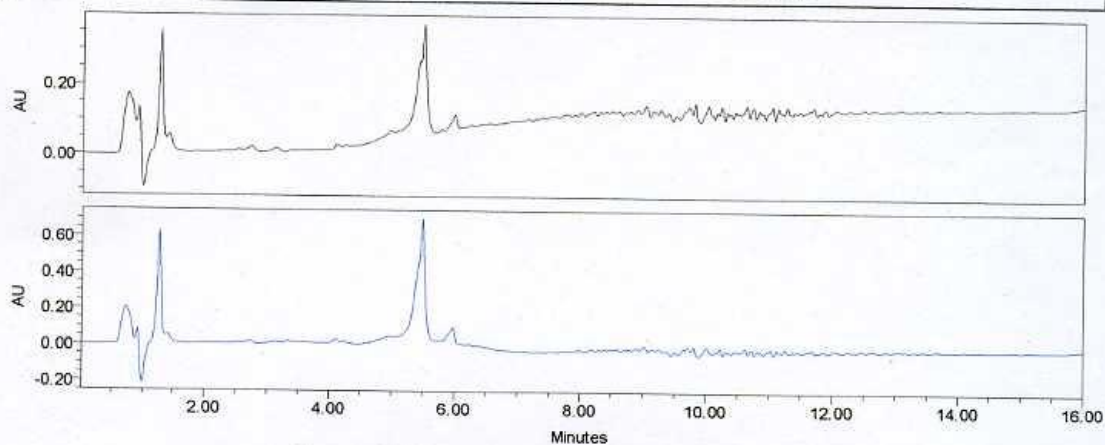

— Channel: 2487Channel 1 Channel Desc.: Processing Method: \*\*\*\*  
 — Channel: 2487Channel 2 Channel Desc.: Processing Method: \*\*\*\*

| Peak Name | RT (min) | Area ( $\mu\text{V}\cdot\text{sec}$ ) | % Area | Height ( $\mu\text{V}$ ) | Amount | Units |
|-----------|----------|---------------------------------------|--------|--------------------------|--------|-------|
| 1         | ****     | ****                                  | ****   | ****                     | ****   | ****  |
| 2         | ****     | ****                                  | ****   | ****                     | ****   | ****  |

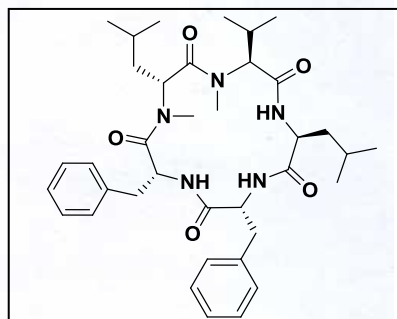

## Compound 7 HPLC Cyclized Pentapeptide D-Phe-Leu-N-Me-Val-N-Me-D-Leu-D-Phe

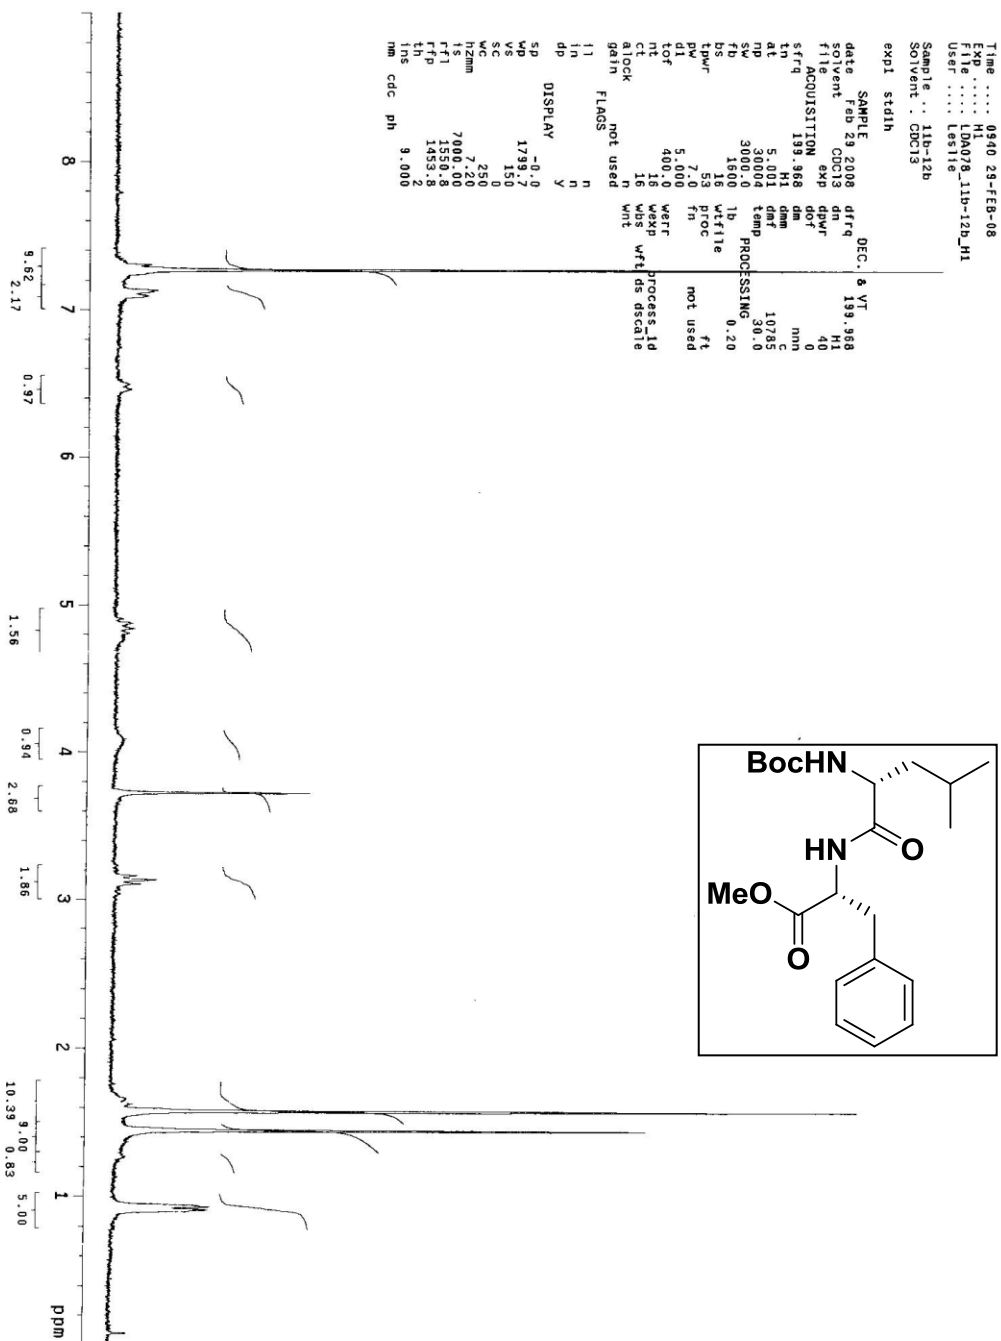

Compound 10 NMR Dipeptide MeO-D-Phe-D-Leu-NHBoc

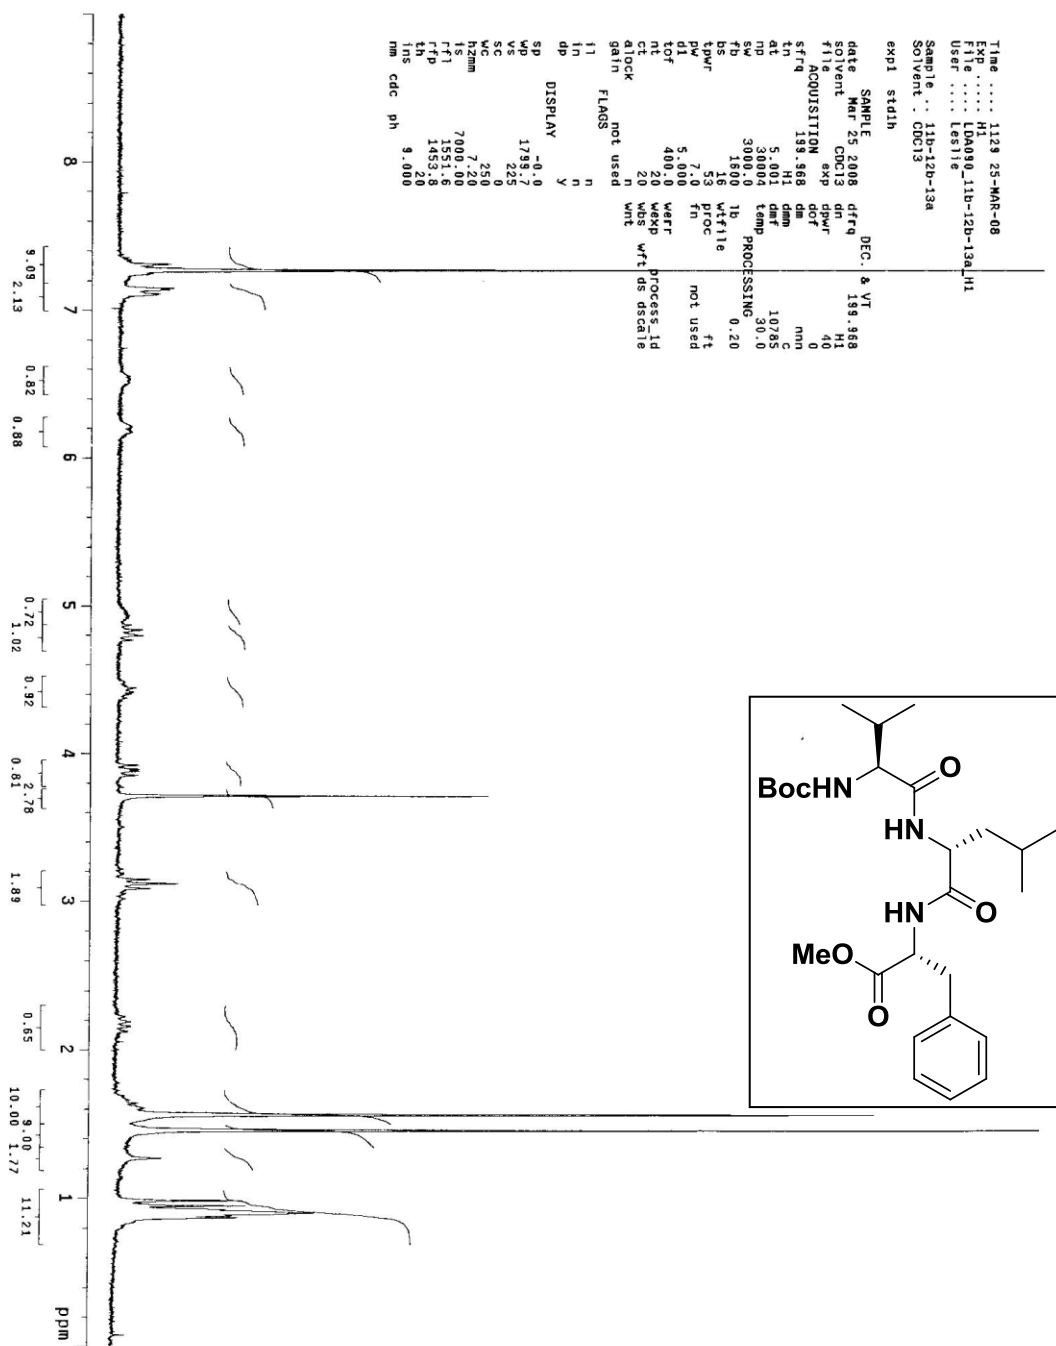

Compound 10 NMR Tripeptide MeO-D-Phe-D-Leu-Val-NHBoc



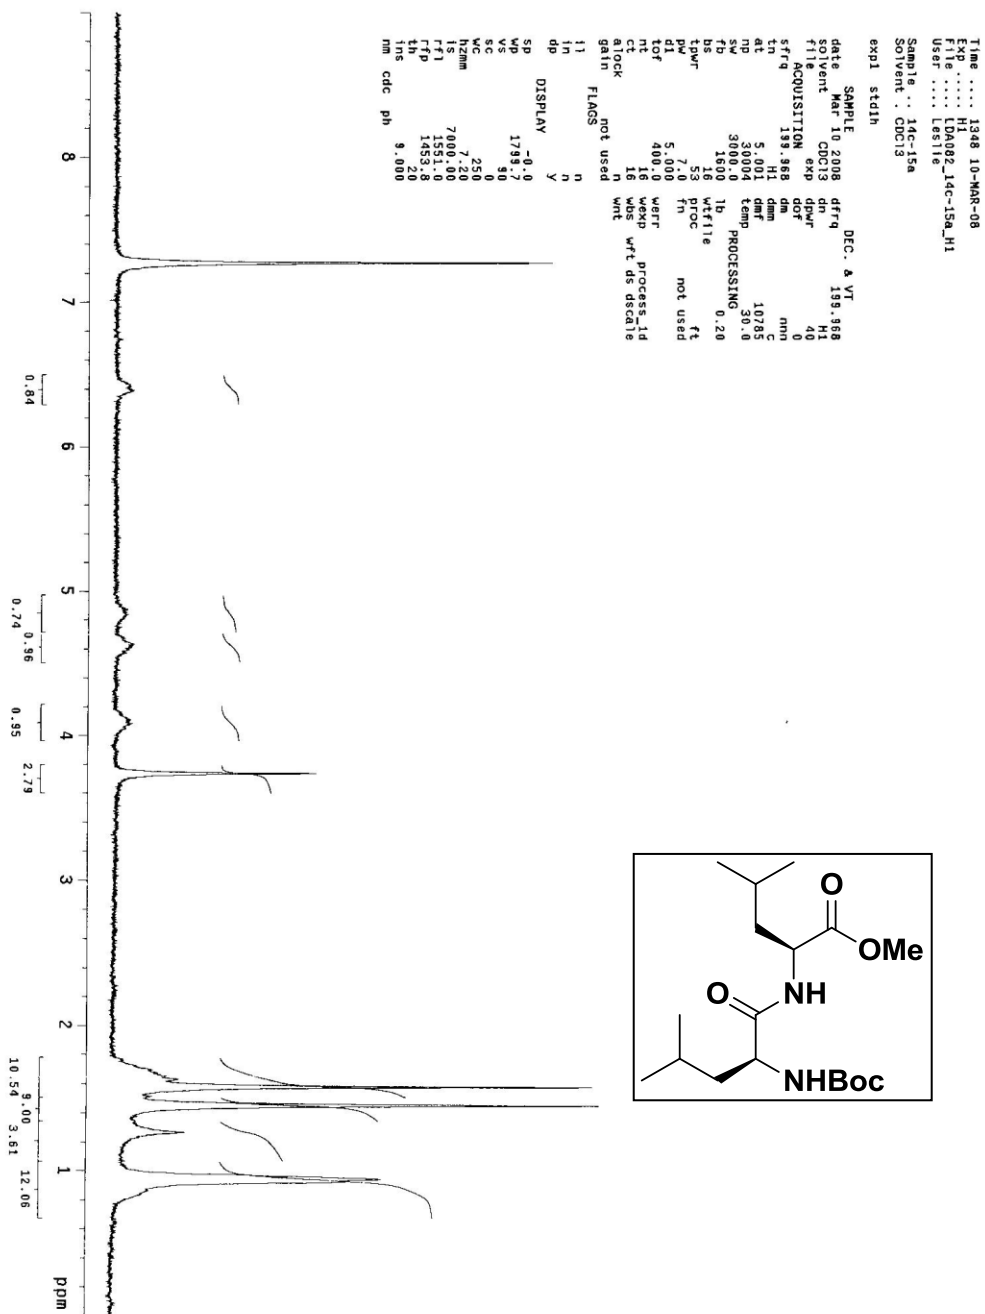

Compound 10 NMR Dipeptide MeO-Leu-Leu-NHBoc

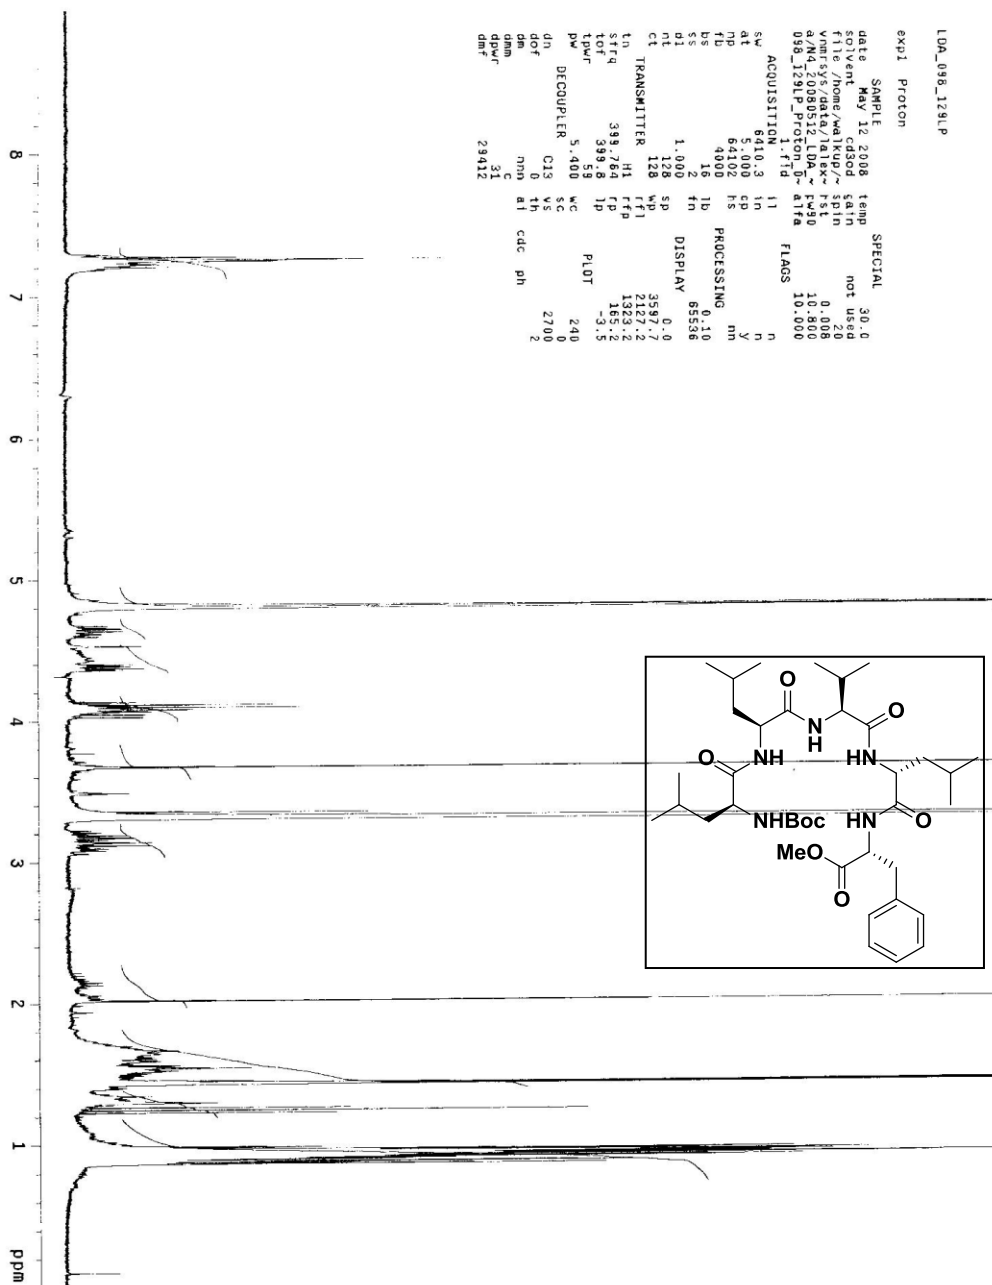

Compound 10 NMR Linear Pentapeptide MeO-D-Phe-D-Leu-Val-Leu-Leu-NHBoc

## Display Report - All Windows Selected Analysis

**Analysis Name:** LDA\_100\_F11-17 **Instrument:** Agilent 6330 Ion Trap **Print Date:** 5/12/2008 1:28:07 PM  
**Method:** SANA.M.D **Operator:** sdsu **Acq. Date:** 5/12/2008 12:08:15 PM  
**Sample Name:** LDA\_100\_f11-17  
**Analysis Info:**

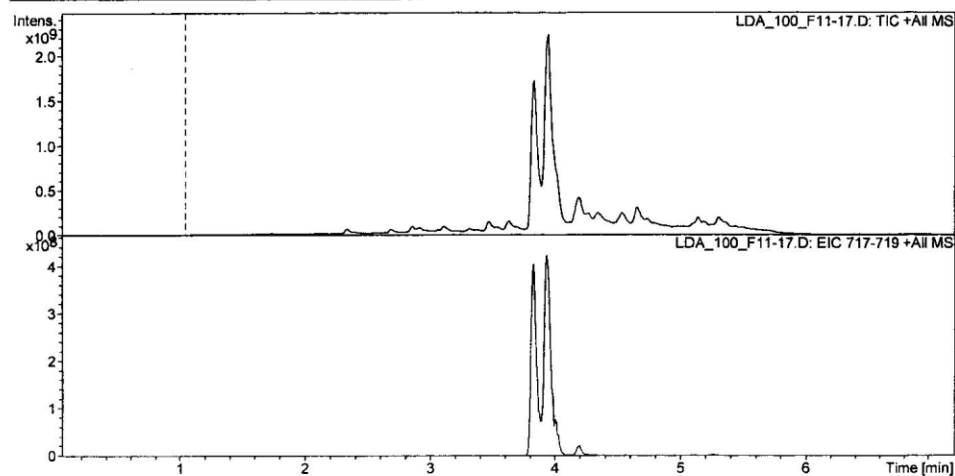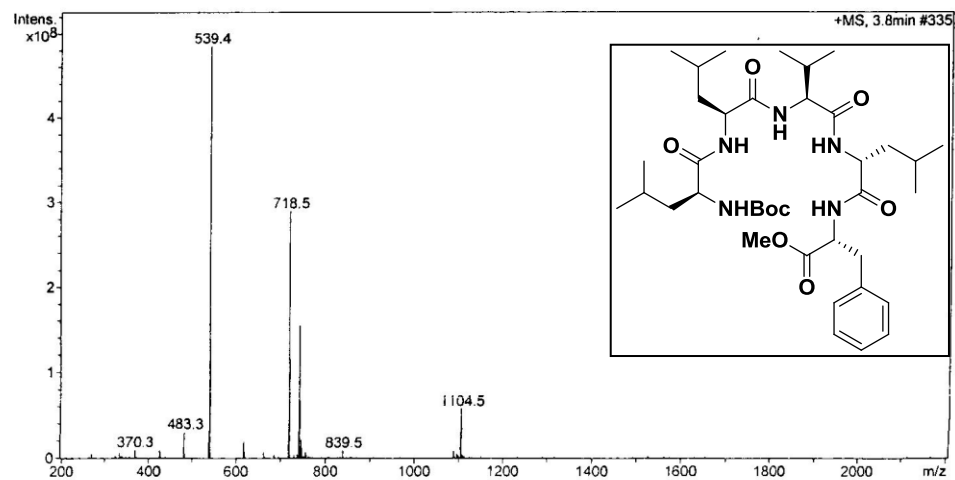

**Compound 10 LCMS Linear Pentapeptide MeO-D-Phe-D-Leu-Val-Leu-Leu-NHBoc (MW=718)**

## Display Report - All Windows Selected Analysis

**Analysis Name:** LDA\_104\_DD129 **Instrument:** Agilent 6330 Ion Trap **Print Date:** 5/16/2008 12:17:03 PM  
**Method:** SANA.M .D **Operator:** sdsu **Acq. Date:** 5/16/2008 12:08:41 PM  
**Sample Name:** LDA\_104\_DD129  
**Analysis Info:**

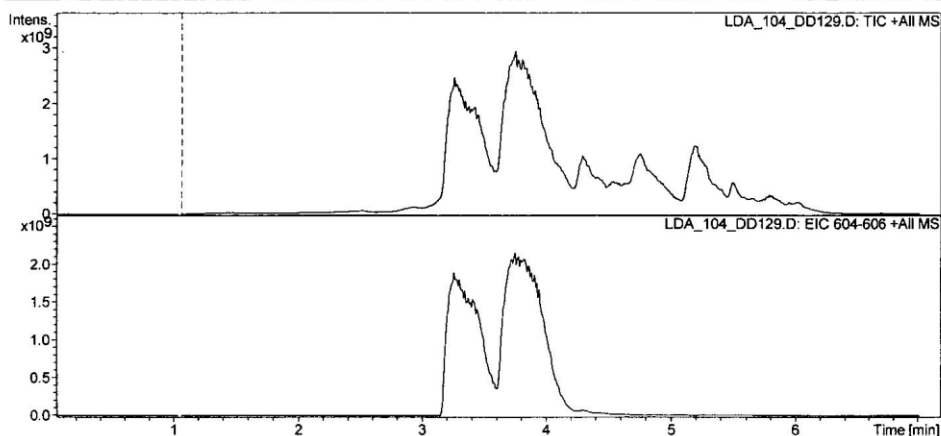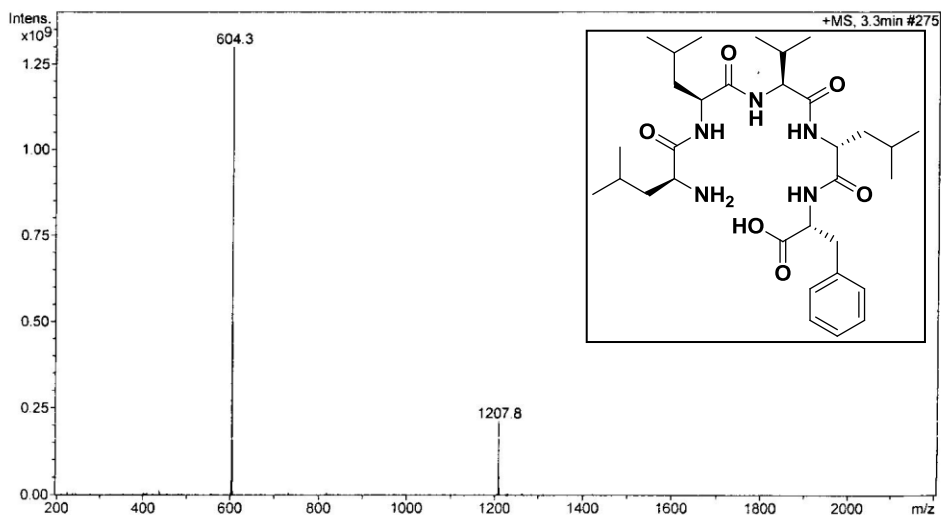

**Compound 10 LCMS Double Deprotected Linear Pentapeptide HO-D-Phe-D-Leu-Val-Leu-Leu-NH<sub>2</sub> (MW=604)**

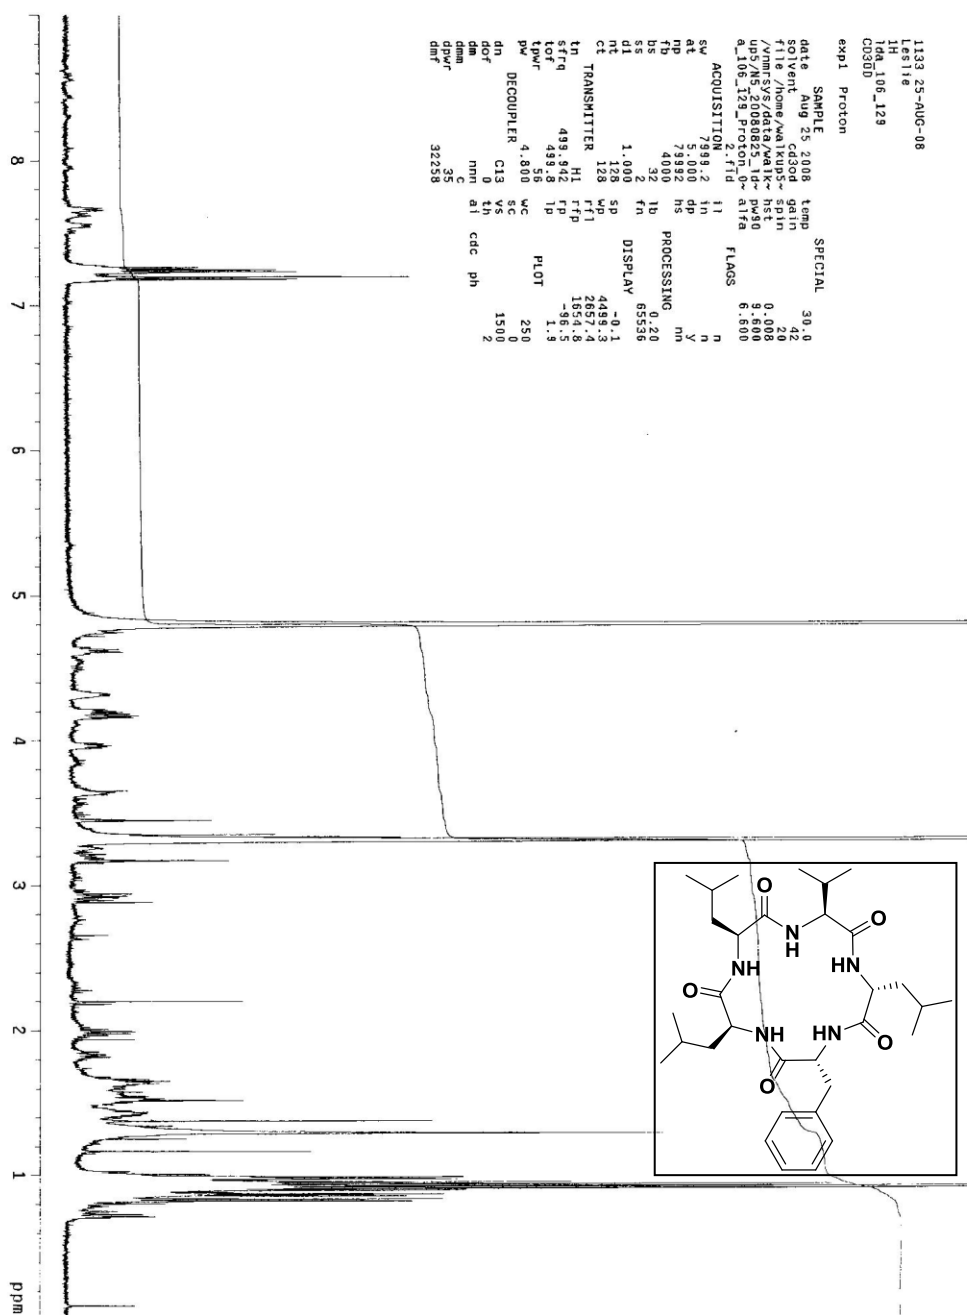

Compound 10 NMR Cyclized Pentapeptide D-Phe-D-Leu-Val-Leu-Leu

## Display Report - All Windows Selected Analysis

**Analysis Name:** LDA\_129\_SSHPL **Instrument:** Agilent 6330 Ion Trap **Print Date:** 9/2/2008 3:50:08 PM  
**Method:** SANA.M C.D **Operator:** sdsu **Acq. Date:** 8/8/2008 10:58:40 AM  
**Sample Name:** LDA\_129\_sshplc  
**Analysis Info:**

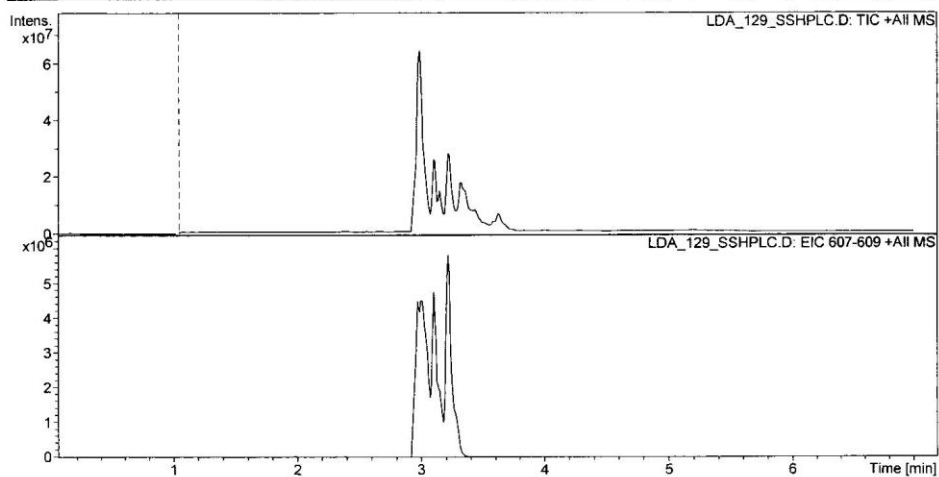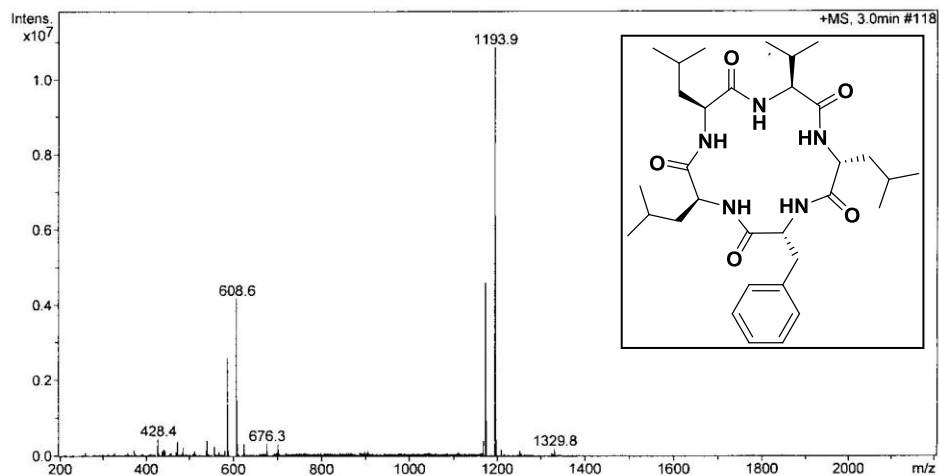

**Compound 10 LCMS Cyclized Pentapeptide D-Phe-D-Leu-Val-Leu-Leu (MW=586)**

San Diego State University; Department of Chemis

Project Name: Defaults

Reported by User: shelli

Breeze

## SAMPLE INFORMATION

|              |               |                   |                     |
|--------------|---------------|-------------------|---------------------|
| Sample Name: | LDA_129_inj1  | Acquired By:      | shelli              |
| Sample Type: | Unknown       | Sample Set Name:  |                     |
| Vial:        | 1             | Acq. Method:      | PrimarySanA_SS_new  |
| Injection #: | 5             | Date Acquired:    | 8/6/2008 2:27:33 PM |
| Run Time:    | 16.00 Minutes | Injection Volume: | 100.00 ul           |

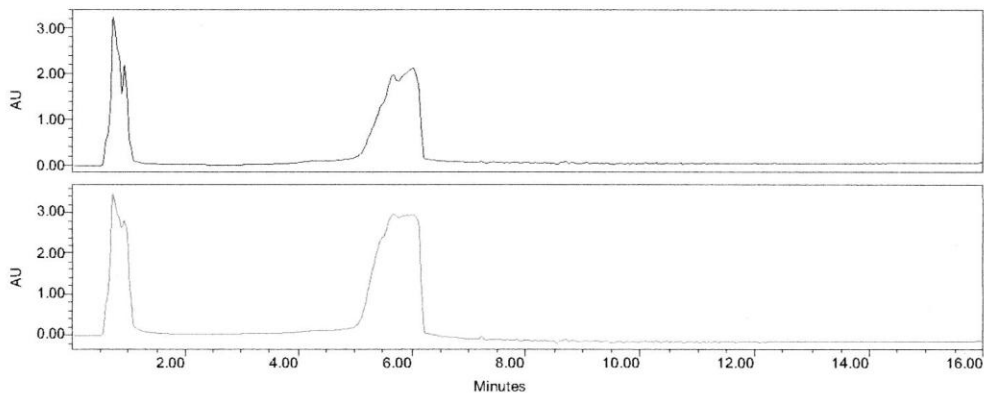

Channel: 2487Channel 1 Channel Desc.: Processing Method: \*  
 Channel: 2487Channel 2 Channel Desc.: Processing Method: \*

| Peak Name | RT (min) | Area (V*sec) | % Area | Height (V) | Amount | Units |
|-----------|----------|--------------|--------|------------|--------|-------|
| 1         | ****     | ****         | ****   | ****       | ****   | ****  |
| 2         | ****     | ****         | ****   | ****       | ****   | ****  |

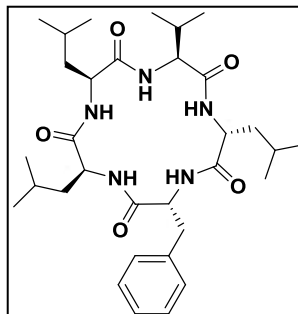

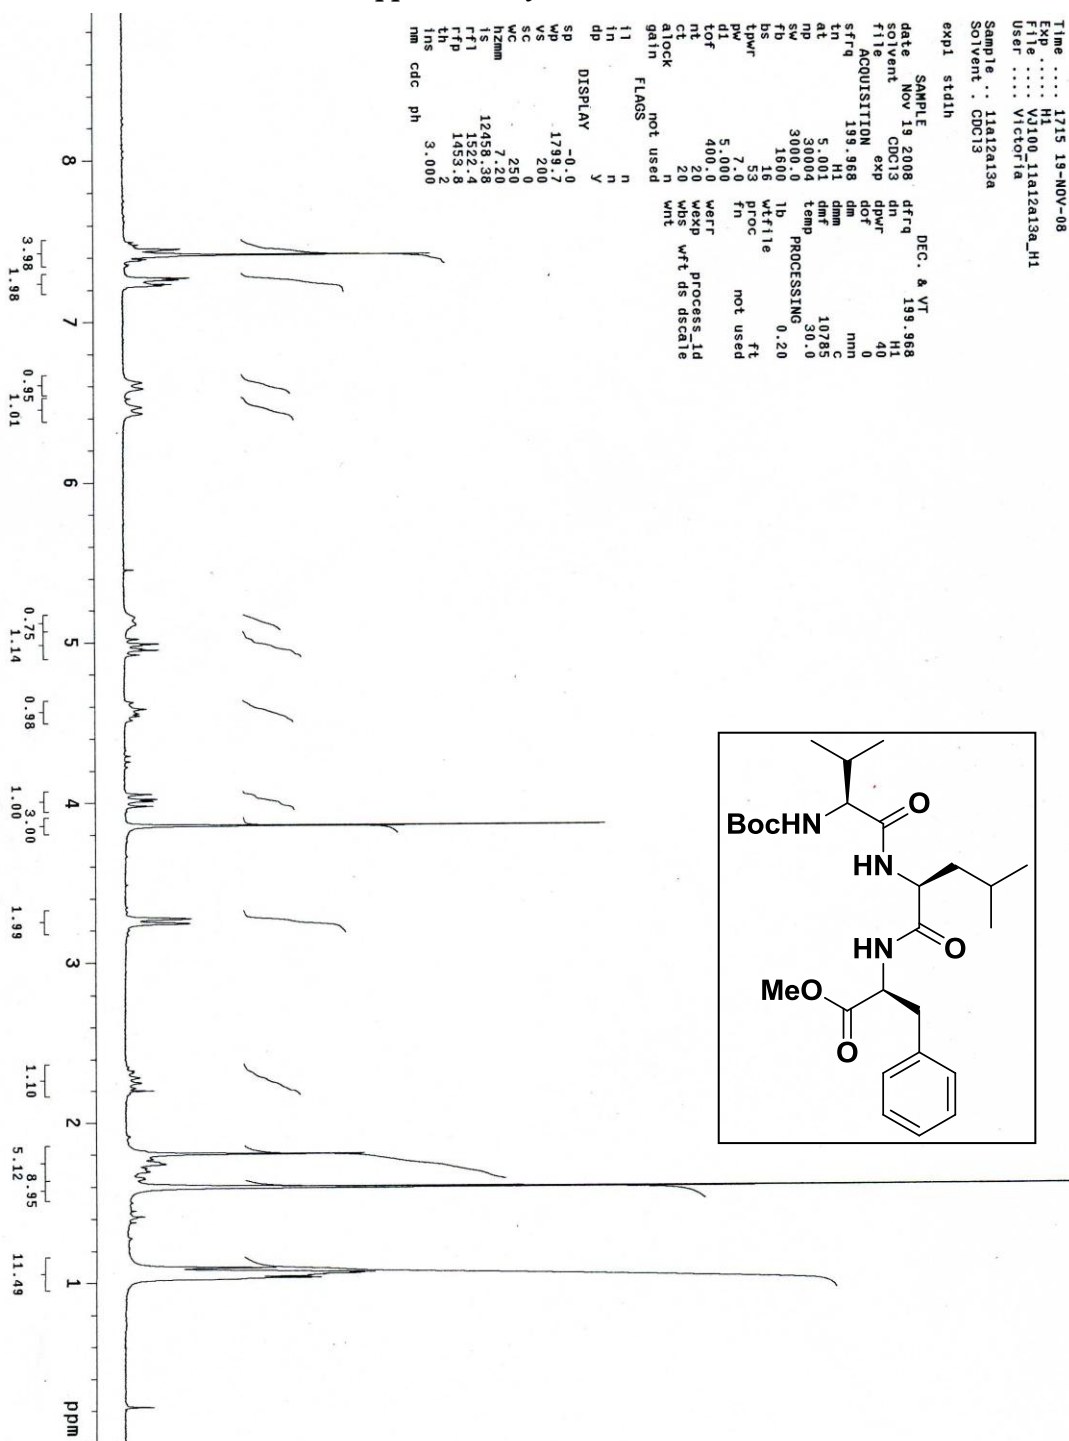

Compound 12 NMR Tripeptide MeO-Phe-Leu-Val-NHBoc



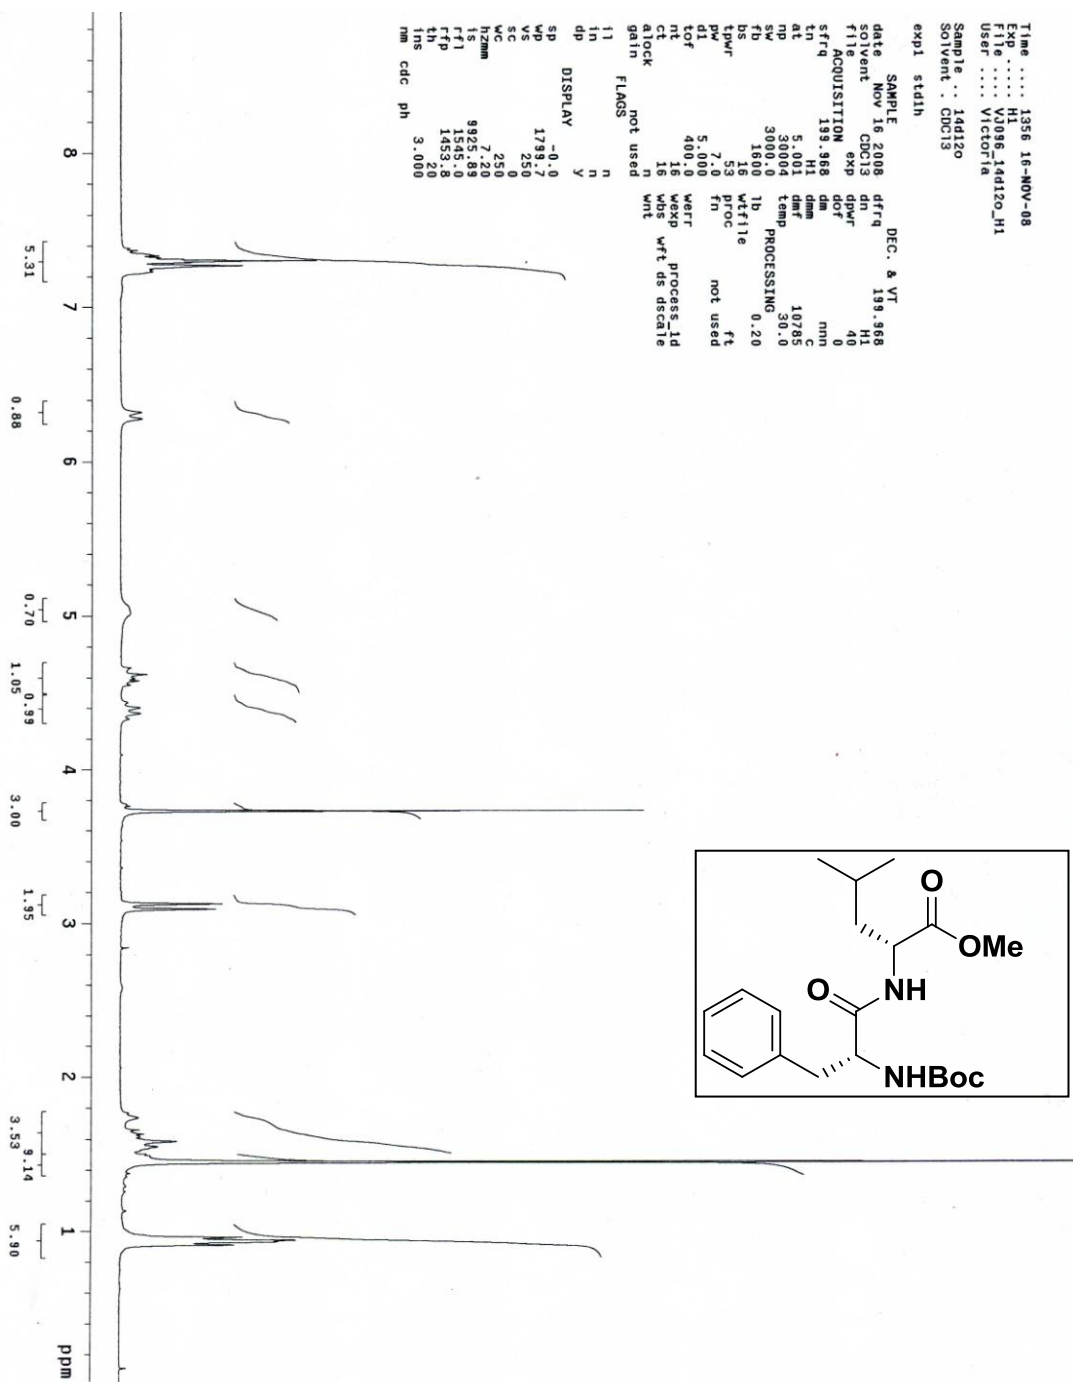

Compound 12 NMR Dipeptide MeO-D-Leu-D-Phe-NHBoc

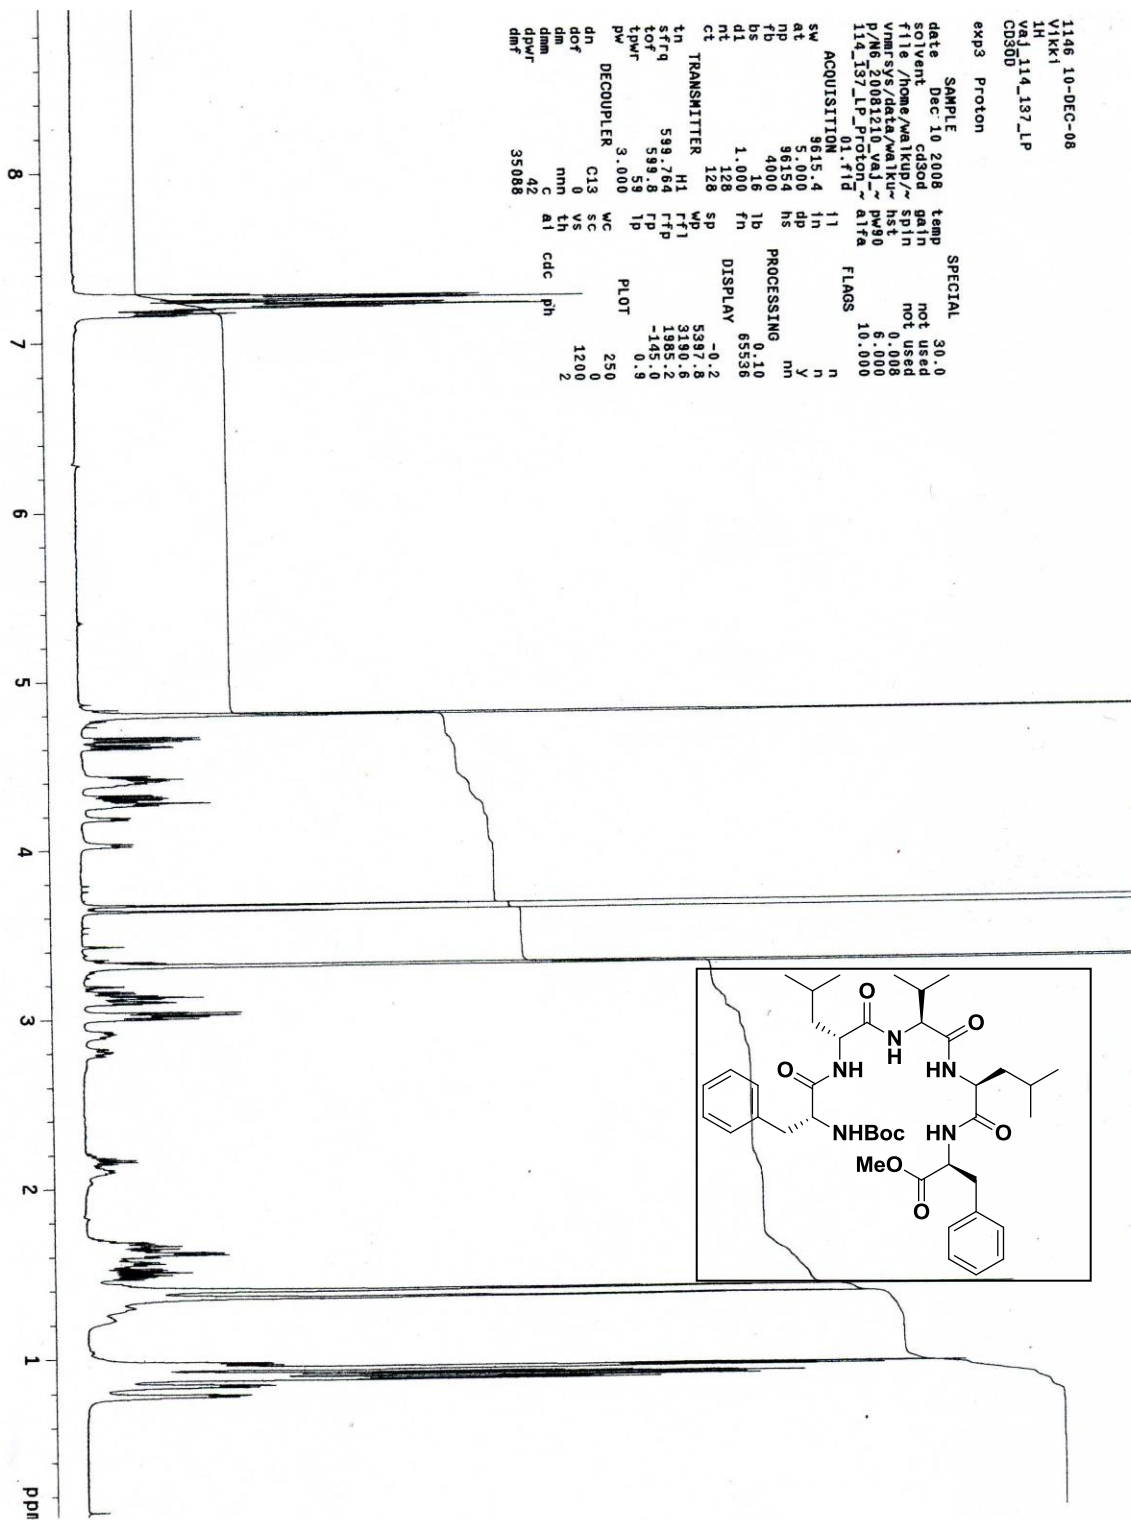

Compound 12 NMR Linear Pentapeptide MeO-Phe-Leu-Val-D-Leu-D-Phe-NHBoc

## Display Report - All Windows Selected Analysis

**Analysis Name:** VJ\_114\_137\_LP. **Instrument:** Agilent 6330 Ion Trap **Print Date:** 12/9/2008 7:12:01 PM  
**Method:** SANA.M D **Operator:** sdsu **Acq. Date:** 12/9/2008 7:02:09 PM  
**Sample Name:** VJ\_114\_137\_LP  
**Analysis Info:**

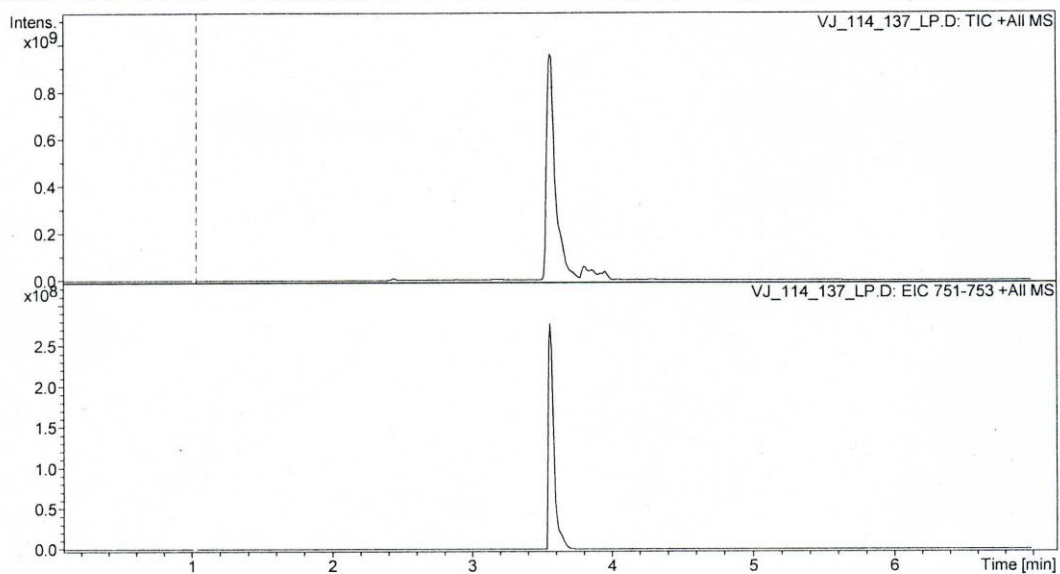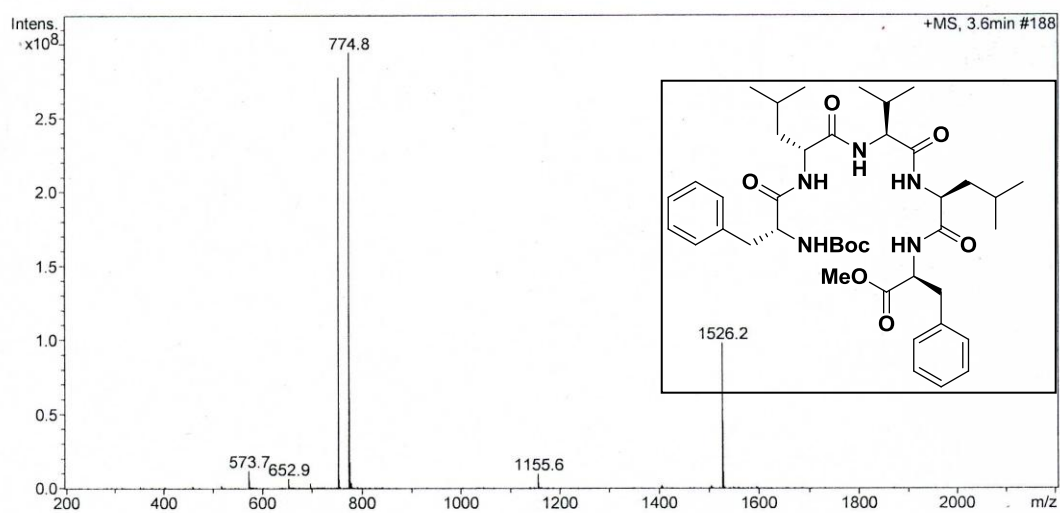

**Compound 12 LCMS Linear Pentapeptide MeO-Phe-Leu-Val-D-Leu-D-Phe-NHBoc (MW=751)**

## Display Report - All Windows Selected Analysis

**Analysis Name:** VJ116\_137\_HO\_ **Instrument:** Agilent 6330 Ion Trap **Print Date:** 7/23/2009 6:09:34 PM  
**Method:** SANA.M LP\_NH2.D **Operator:** sdsu **Acq. Date:** 1/7/2009 5:14:33 PM  
**Sample Name:** VJ116\_137\_HO\_LP\_NH2  
**Analysis Info:**

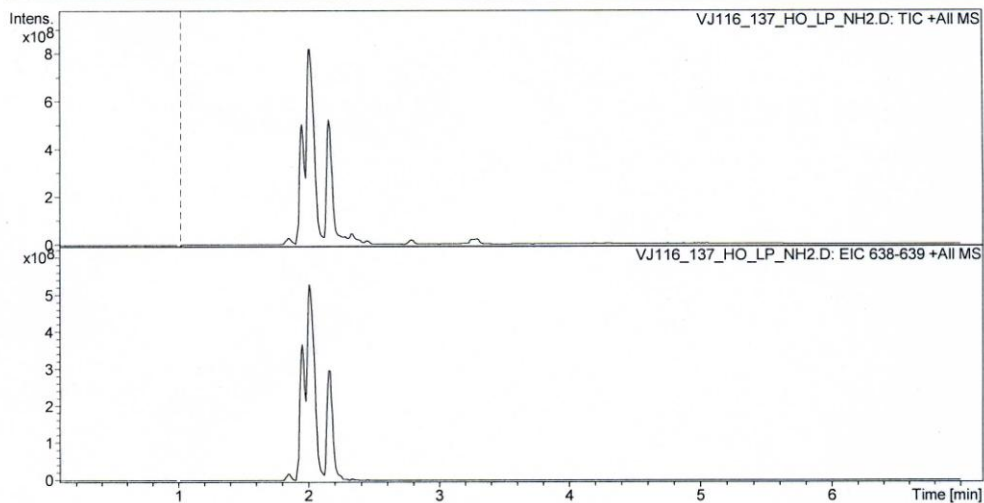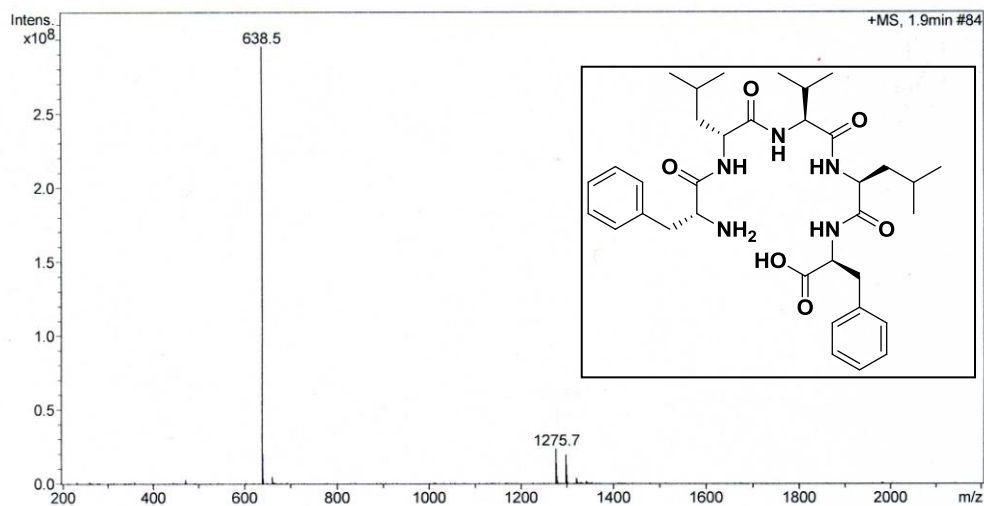

**Compound 12 LCMS Double Deprotected Linear Pentapeptide HO-Phe-Leu-Val-D-Leu-D-Phe-NH<sub>2</sub> (MW=638)**

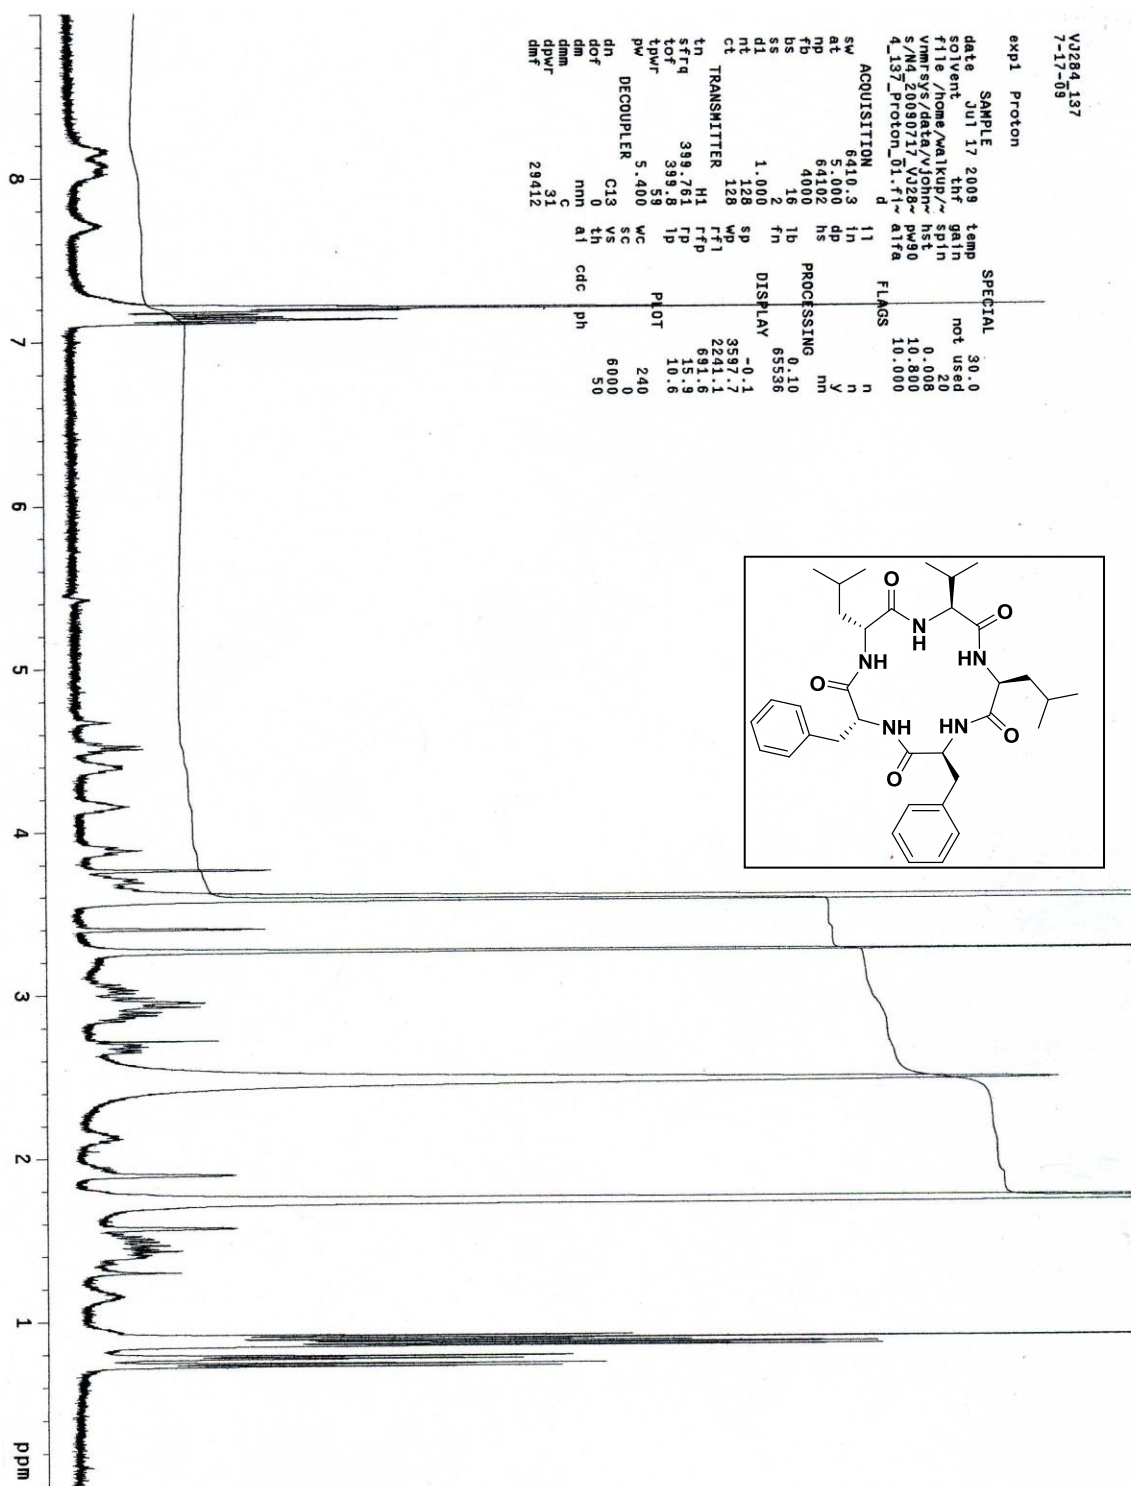

Compound 12 NMR Cyclized Pentapeptide Phe-Leu-Val-D-Leu-D-Phe

## Display Report - All Windows Selected Analysis

**Analysis Name:** VJ284\_137.D    **Instrument:** Agilent 6330 Ion Trap    **Print Date:** 7/17/2009 1:22:58 PM  
**Method:** SANA\_LONG.M    **Operator:** sdsu    **Acq. Date:** 7/16/2009 8:11:40 PM  
**Sample Name:** VJ284\_137  
**Analysis Info:**

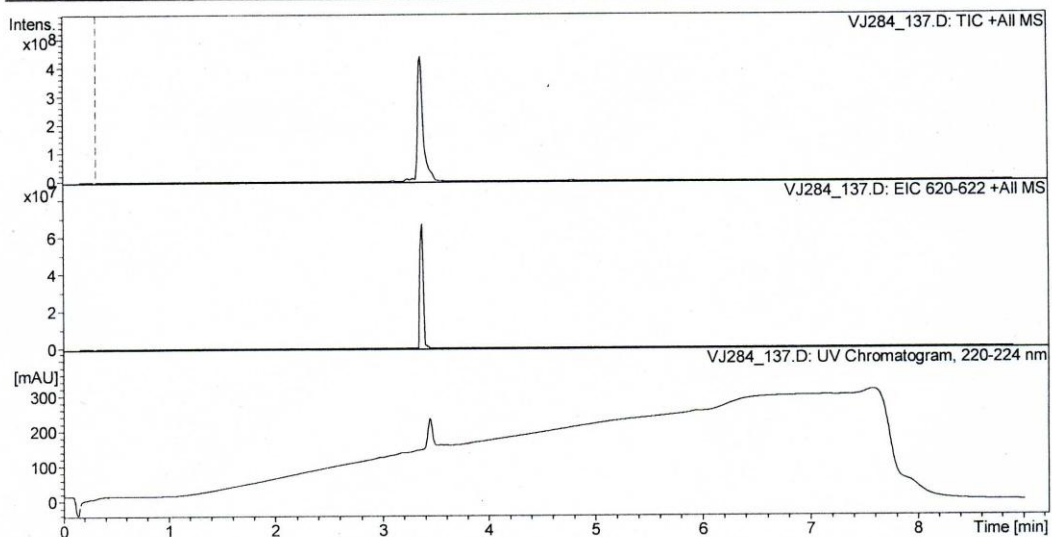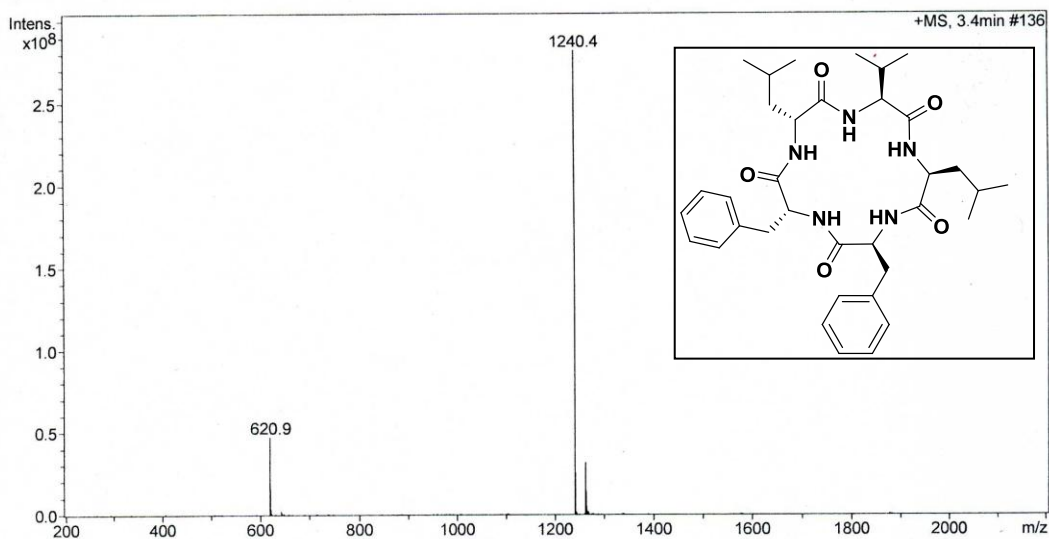

**Compound 12 LCMS Cyclized Pentapeptide Phe-Leu-Val-D-Leu-D-Phe (MW=620)**



SDSU

Project Name: Defaults  
Reported by User: System

Breeze

## SAMPLE INFORMATION

|              |               |                   |                      |
|--------------|---------------|-------------------|----------------------|
| Sample Name: | VJ284_137     | Acquired By:      | System               |
| Sample Type: | Unknown       | Sample Set Name:  |                      |
| Vial:        | 1             | Acq. Method:      | primary_sanA_ss_ACN  |
| Injection #: | 40            | Date Acquired:    | 7/16/2009 6:55:06 PM |
| Run Time:    | 16.00 Minutes | Injection Volume: | 50.00 ul             |

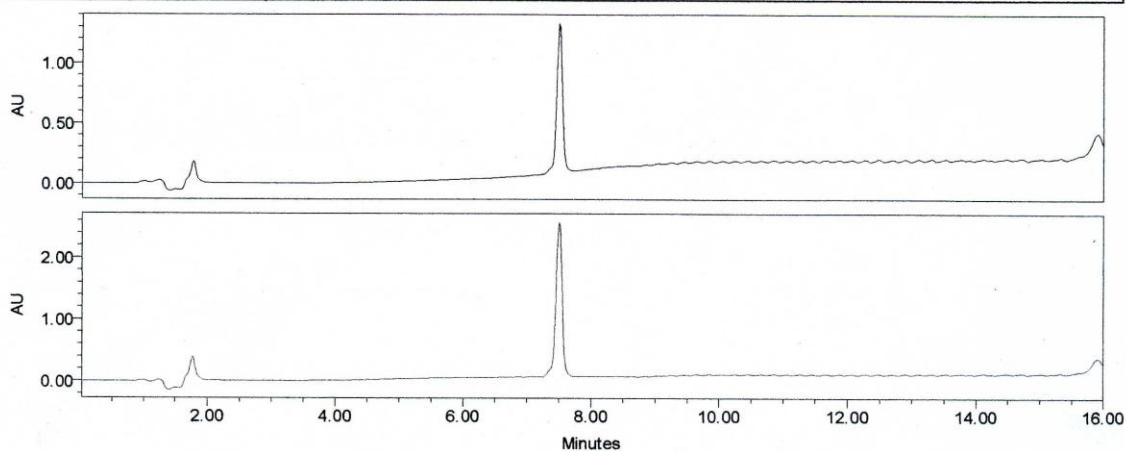

— Channel: 2487Channel 1 Channel Desc.: Processing Method: \*\*\*\*  
 — Channel: 2487Channel 2 Channel Desc.: Processing Method: \*\*\*\*

| Peak Name | RT (min) | Area ( $\mu\text{V}\cdot\text{sec}$ ) | % Area | Height ( $\mu\text{V}$ ) | Amount | Units |
|-----------|----------|---------------------------------------|--------|--------------------------|--------|-------|
| 1         | ****     | ****                                  | ****   | ****                     | ****   | ****  |
| 2         | ****     | ****                                  | ****   | ****                     | ****   | ****  |

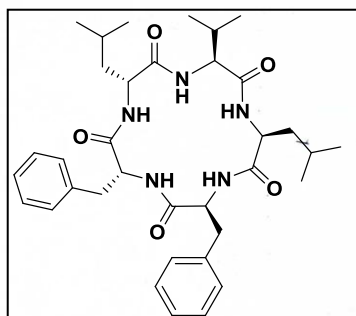

## Compound 12 HPLC Cyclized Pentapeptide Phe-Leu-Val-D-Leu-D-Phe

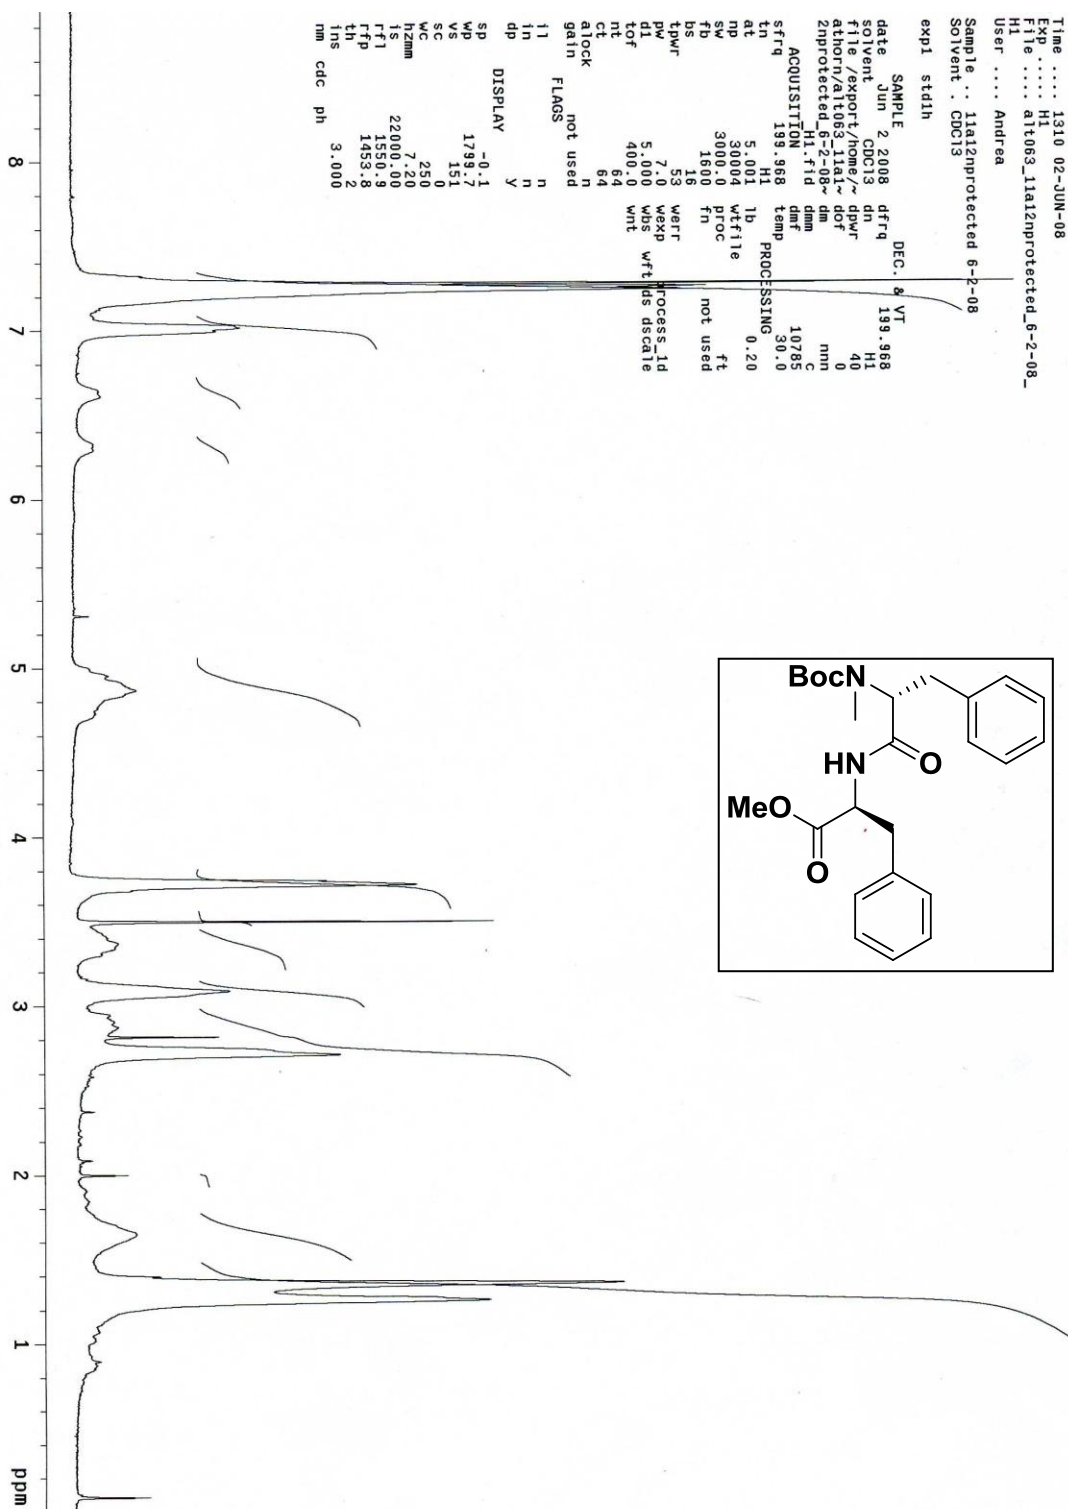

Compound 15 NMR Dipeptide MeO-Phe-N-Me-D-Phe-Boc





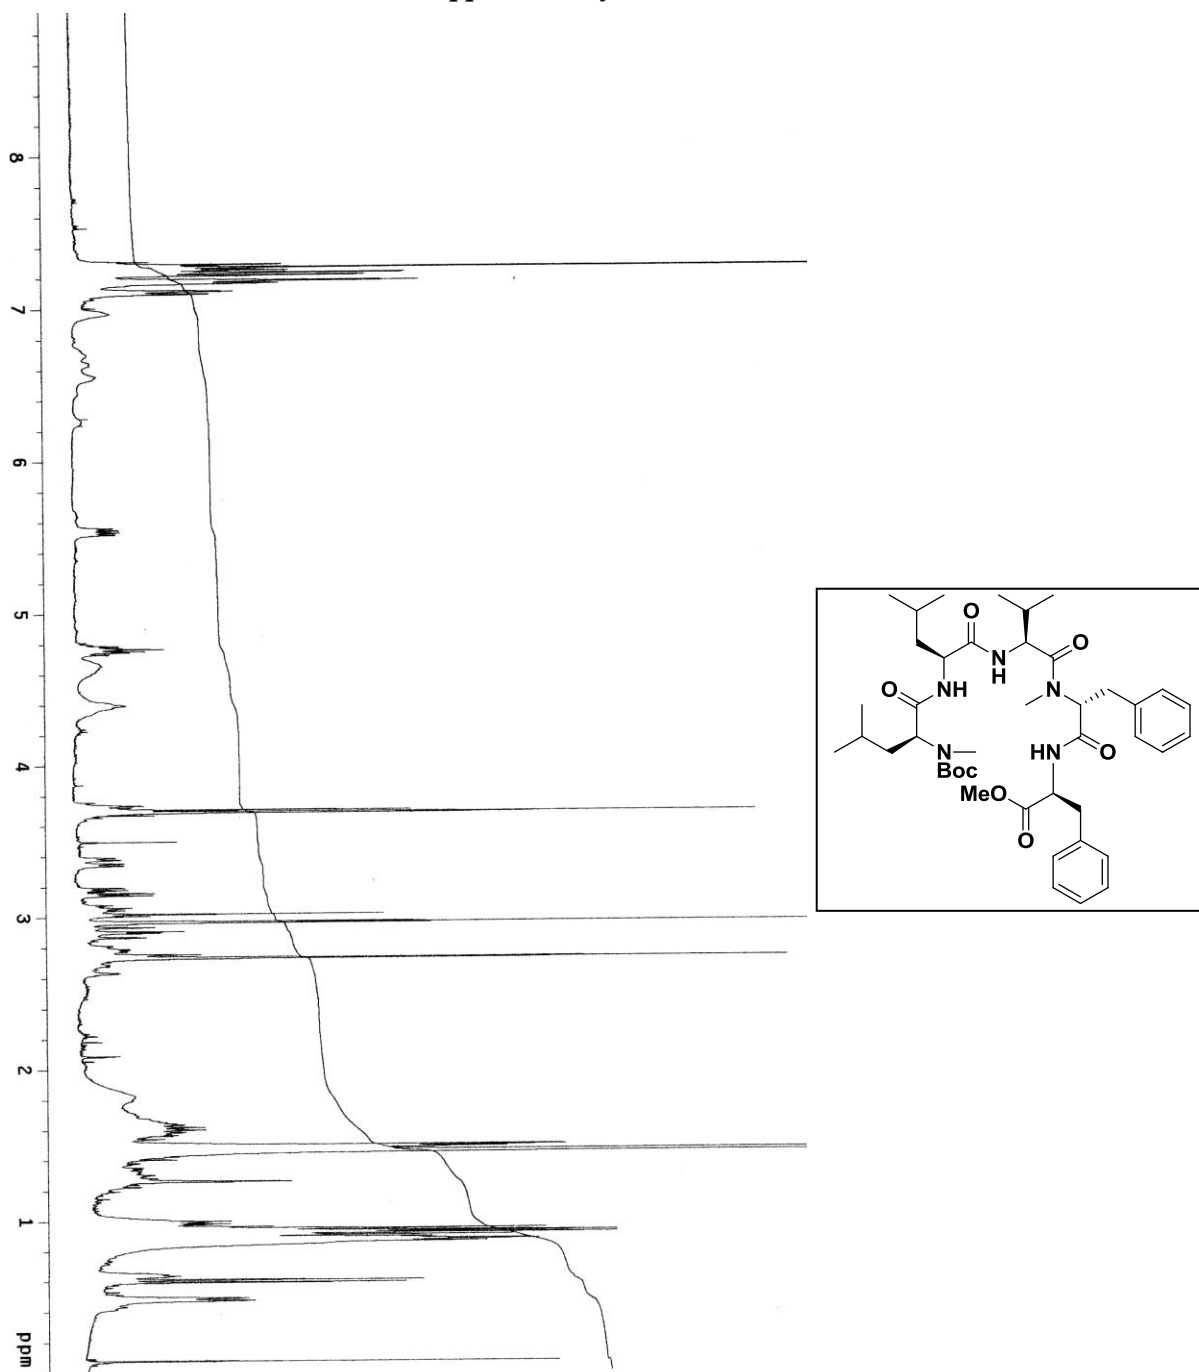

## Display Report - All Windows Selected Analysis

**Analysis Name:** ALT\_082\_LPPUR **Instrument:** Agilent 6330 Ion Trap **Print Date:** 6/12/2008 1:15:31 PM  
**Method:** SANA.M E.D **Operator:** sdsu **Acq. Date:** 6/12/2008 12:53:28 PM  
**Sample Name:** ALT\_082\_LPpure  
**Analysis Info:**

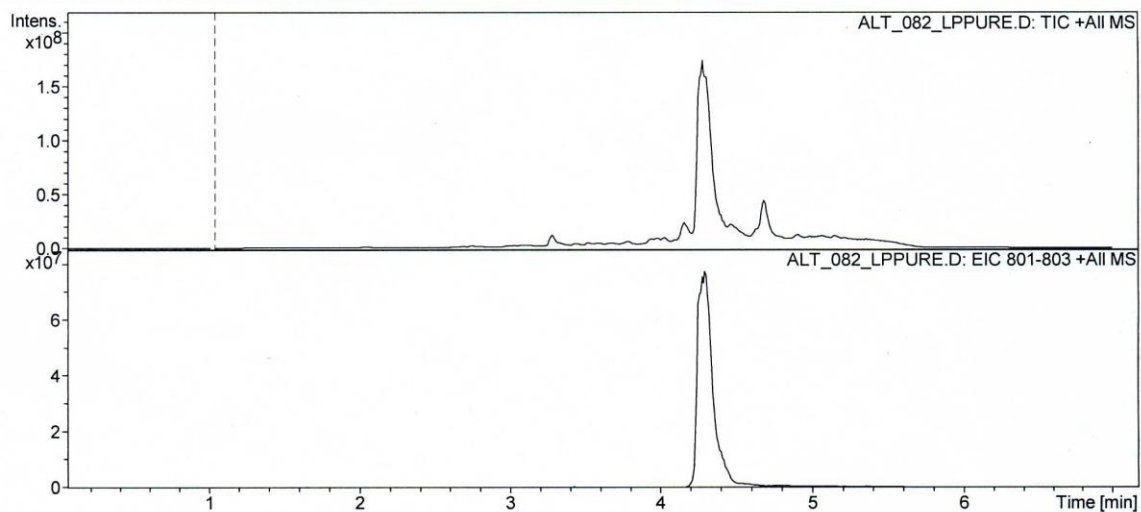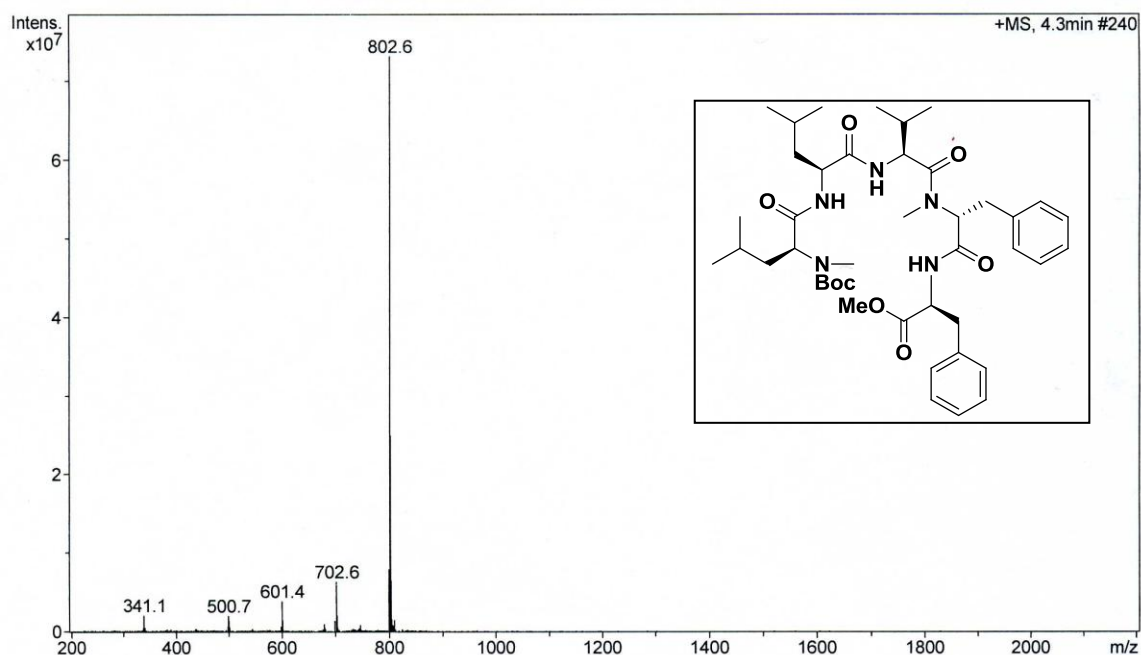

**Compound 15 LCMS Linear Pentapeptide MeO-Phe-N-Me-D-Phe-Val-Leu-N-Me-Leu-Boc (MW=780)**

## Display Report - All Windows All Analyses

Operator: sdsu

Instrument: Agilent 6330 Ion Trap

Print Date: 6/19/2008 12:00:11 PM

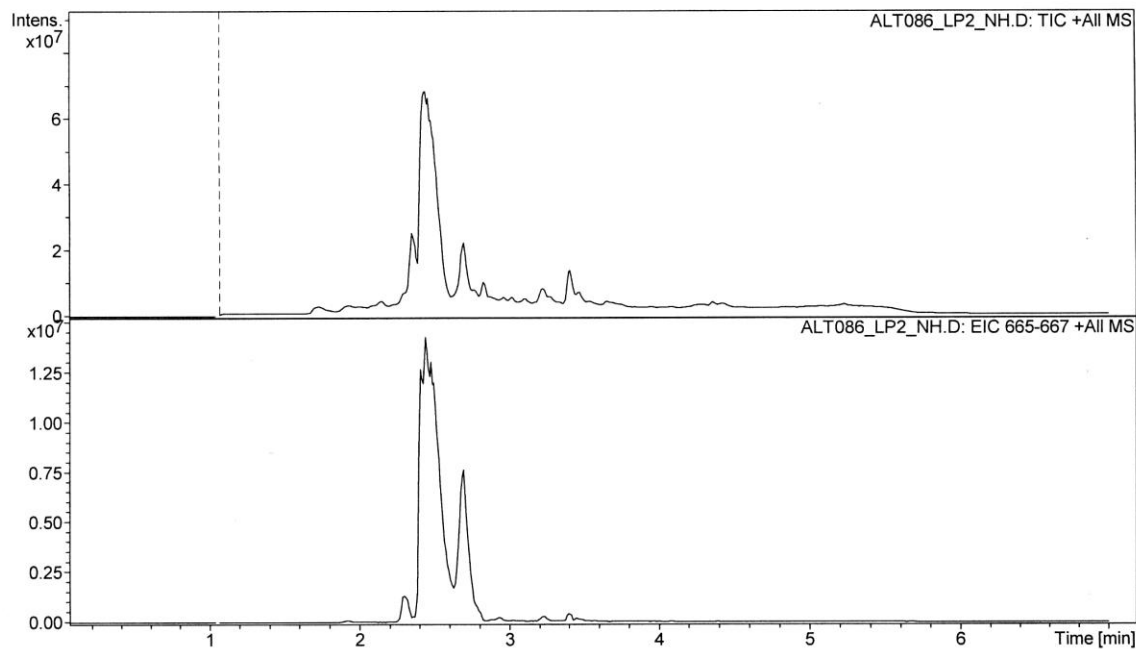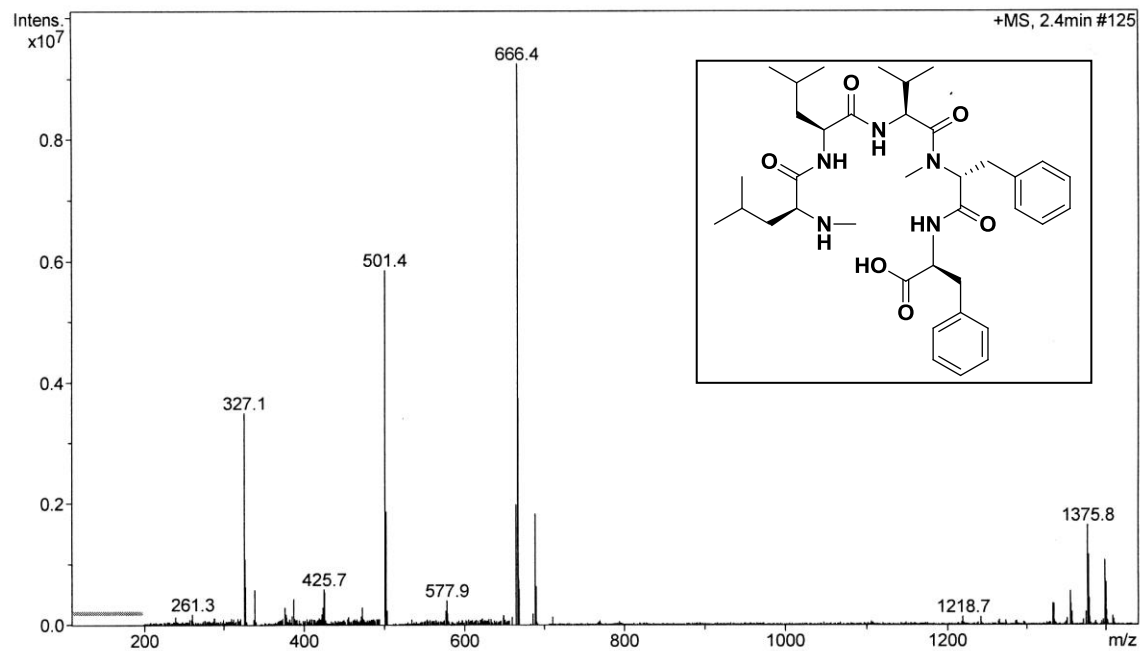

**Compound 15 LCMS Double Deprotected Linear Pentapeptide HO-Phe-N-Me-D-Phe-Val-Leu-N-Me-Leu-H (MW=665.8)**

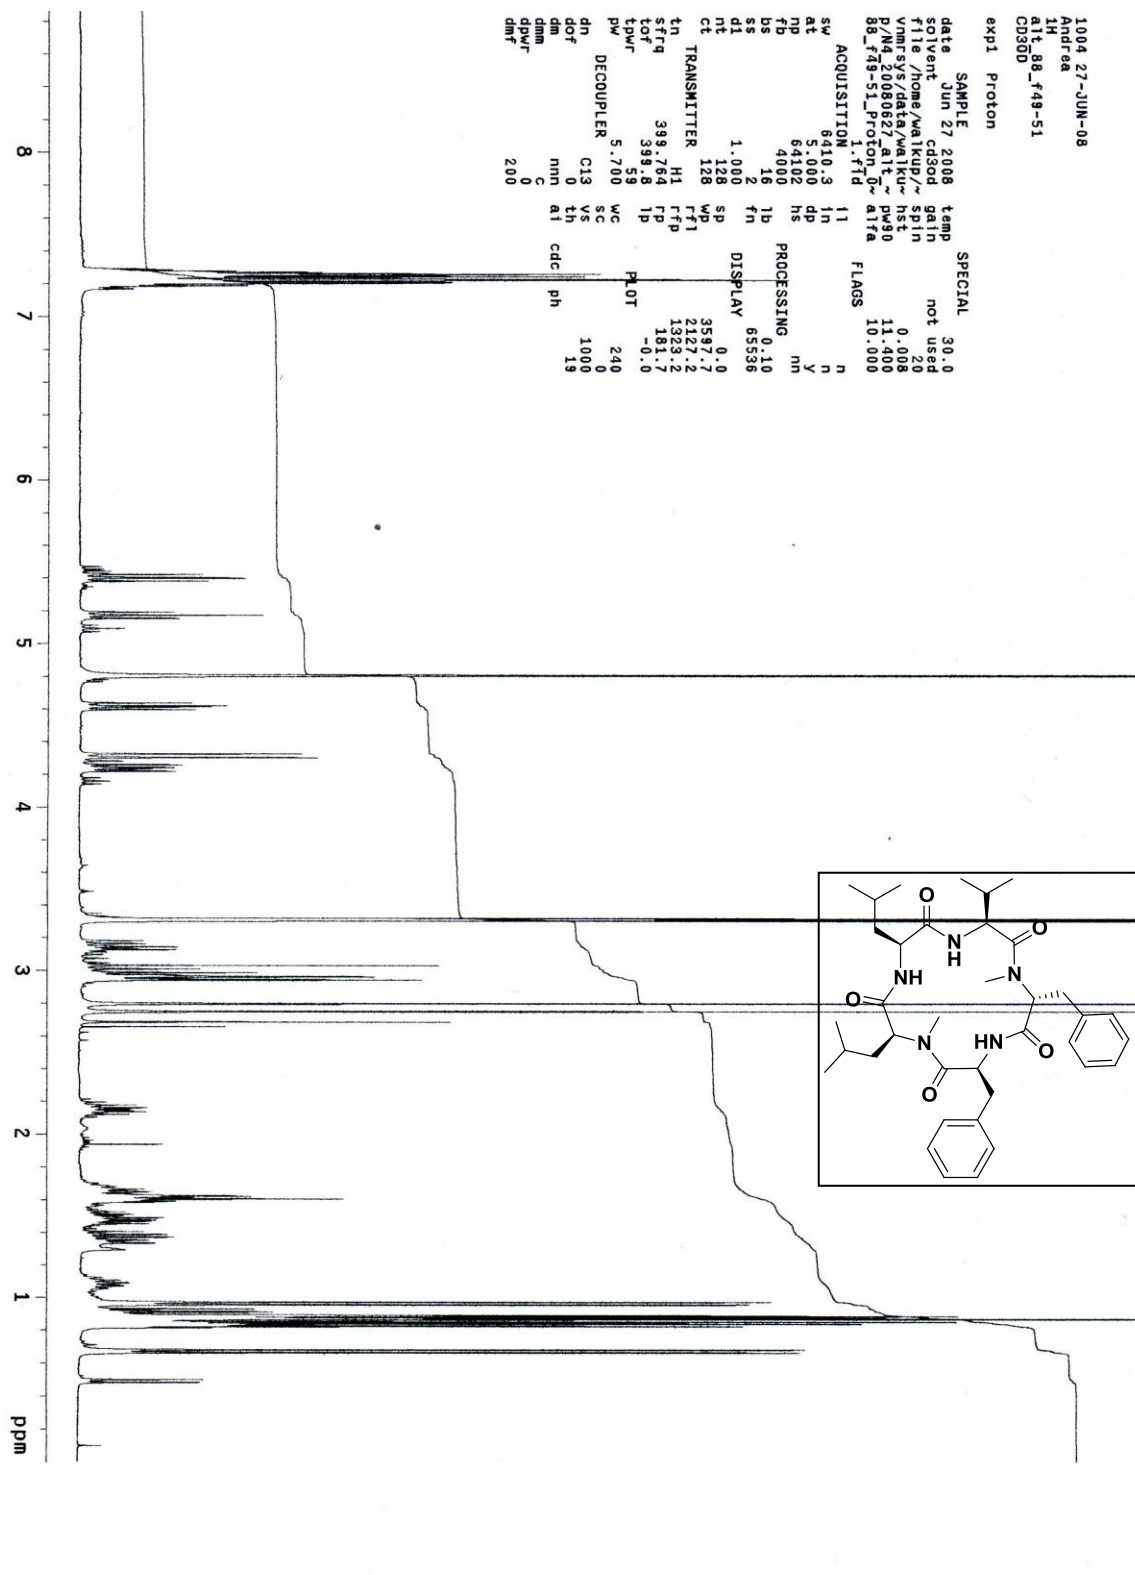

Compound 15 NMR Cyclized Pentapeptide Phe-N-Me-D-Phe-Val-Leu-N-Me-Leu

## Display Report - All Windows Selected Analysis

**Analysis Name:** ALT88\_F49-51.D **Instrument:** Agilent 6330 Ion Trap **Print Date:** 6/25/2008 7:19:15 PM  
**Method:** SANA.M **Operator:** sdsu **Acq. Date:** 6/25/2008 7:09:38 PM  
**Sample Name:** ALT88\_f49-51  
**Analysis Info:**

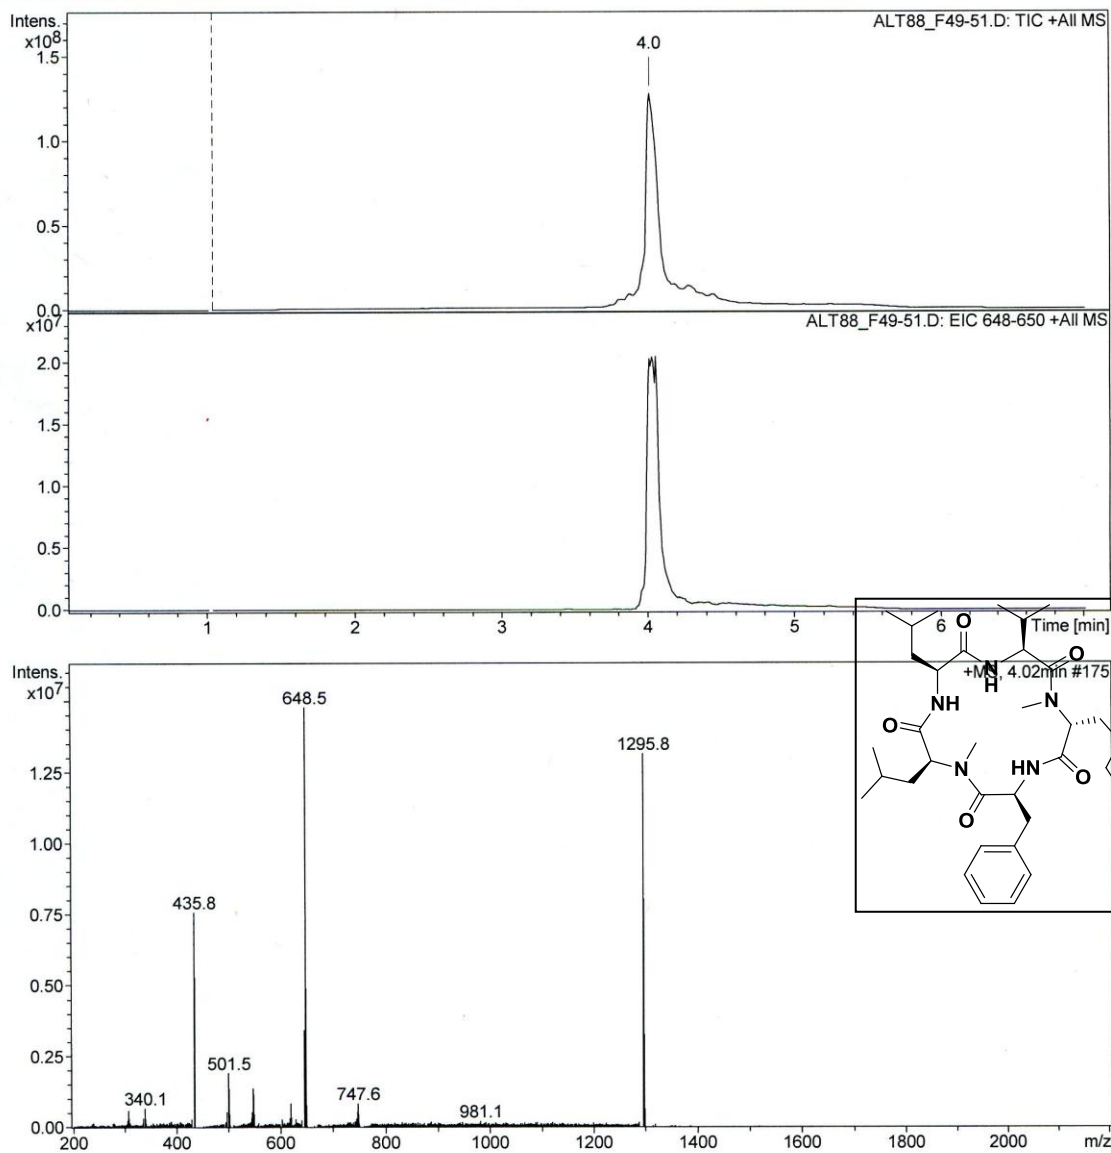

San Diego State University; Department of Chemis

Project Name: Defaults

Reported by User: shelli

Breeze

## SAMPLE INFORMATION

Sample Name: alt\_88\_f-49-51

Sample Type: Unknown

Vial: 1

Injection #: 22

Run Time: 16.00 Minutes

Acquired By: shelli

Sample Set Name:

Acq. Method: PrimarySanA\_SS

Date Acquired: 6/27/2008 4:10:05 PM

Injection Volume: 100.00 ul

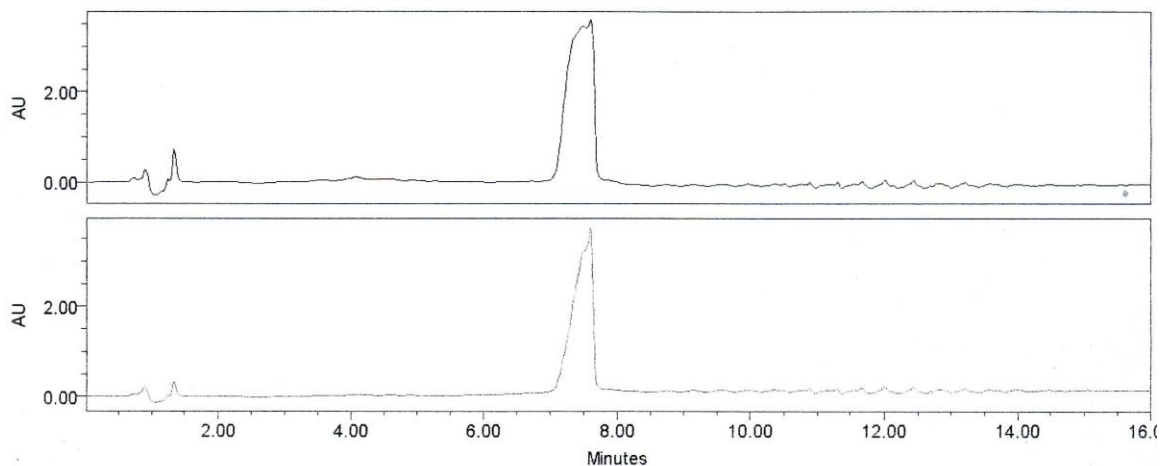

Channel: 2487Channel 1 Channel Desc.: Processing Method: \*\*\*\*  
 Channel: 2487Channel 2 Channel Desc.: Processing Method: \*\*\*\*

| Peak Name | RT (min) | Area ( $\mu\text{V}\cdot\text{sec}$ ) | % Area | Height ( $\mu\text{V}$ ) | Amount | Units |
|-----------|----------|---------------------------------------|--------|--------------------------|--------|-------|
| 1 ****    | ****     | ****                                  | ****   | ****                     | ****   | ****  |
| 2 ****    | ****     | ****                                  | ****   | ****                     | ****   | ****  |

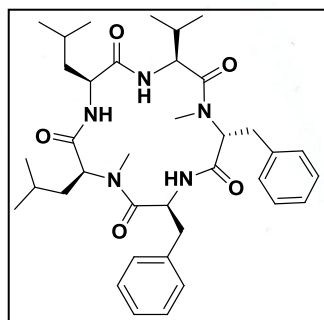

## Compound 15 HPLC Cyclized Pentapeptide Phe-N-Me-D-Phe-Val-Leu-N-Me-Leu

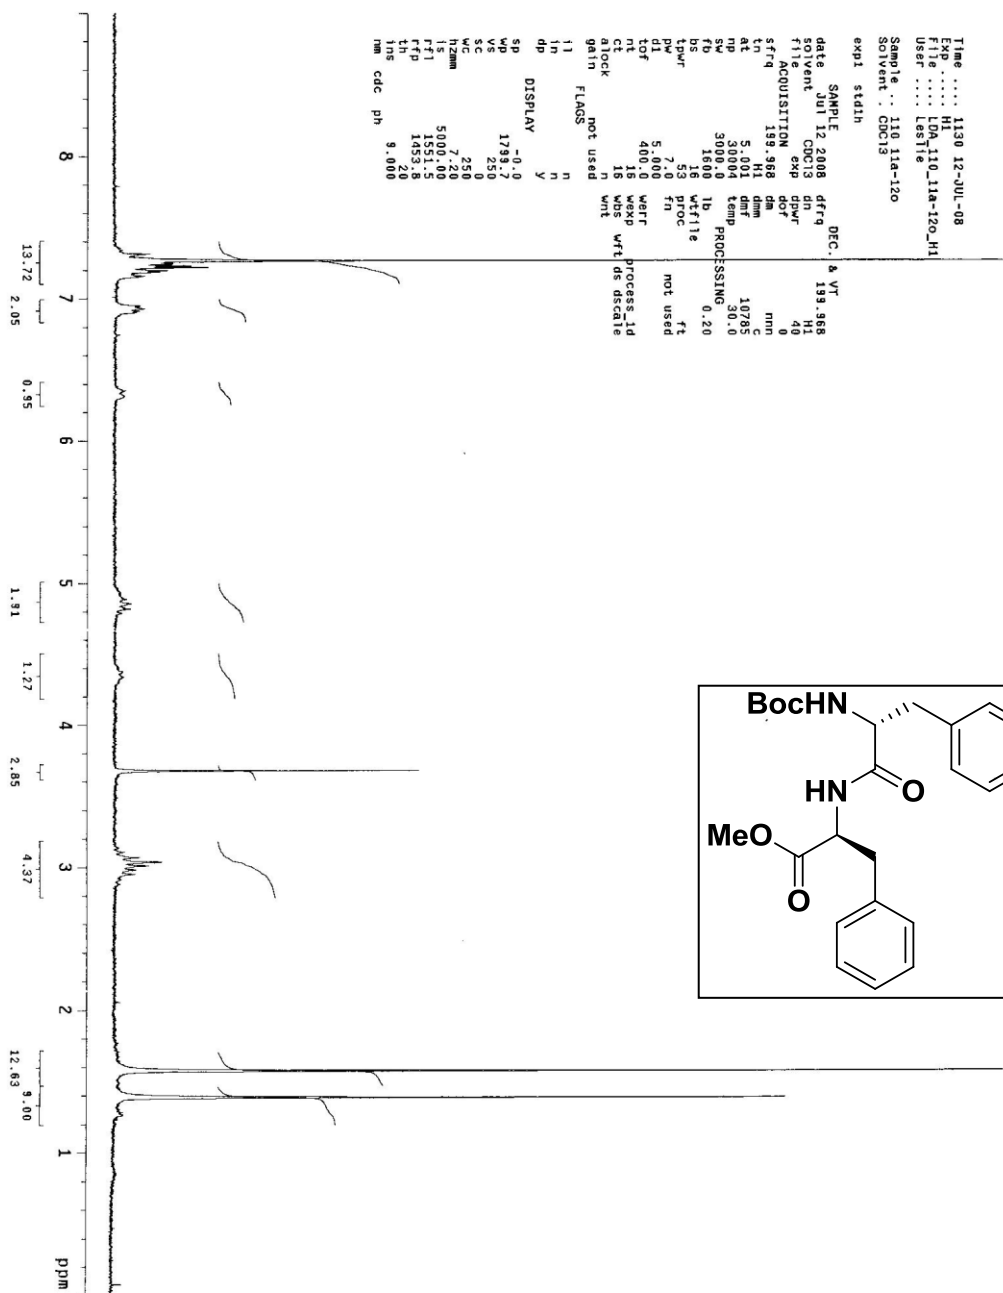

Compound 18 NMR Dipeptide MeO-Phe-D-Phe-NHBoc



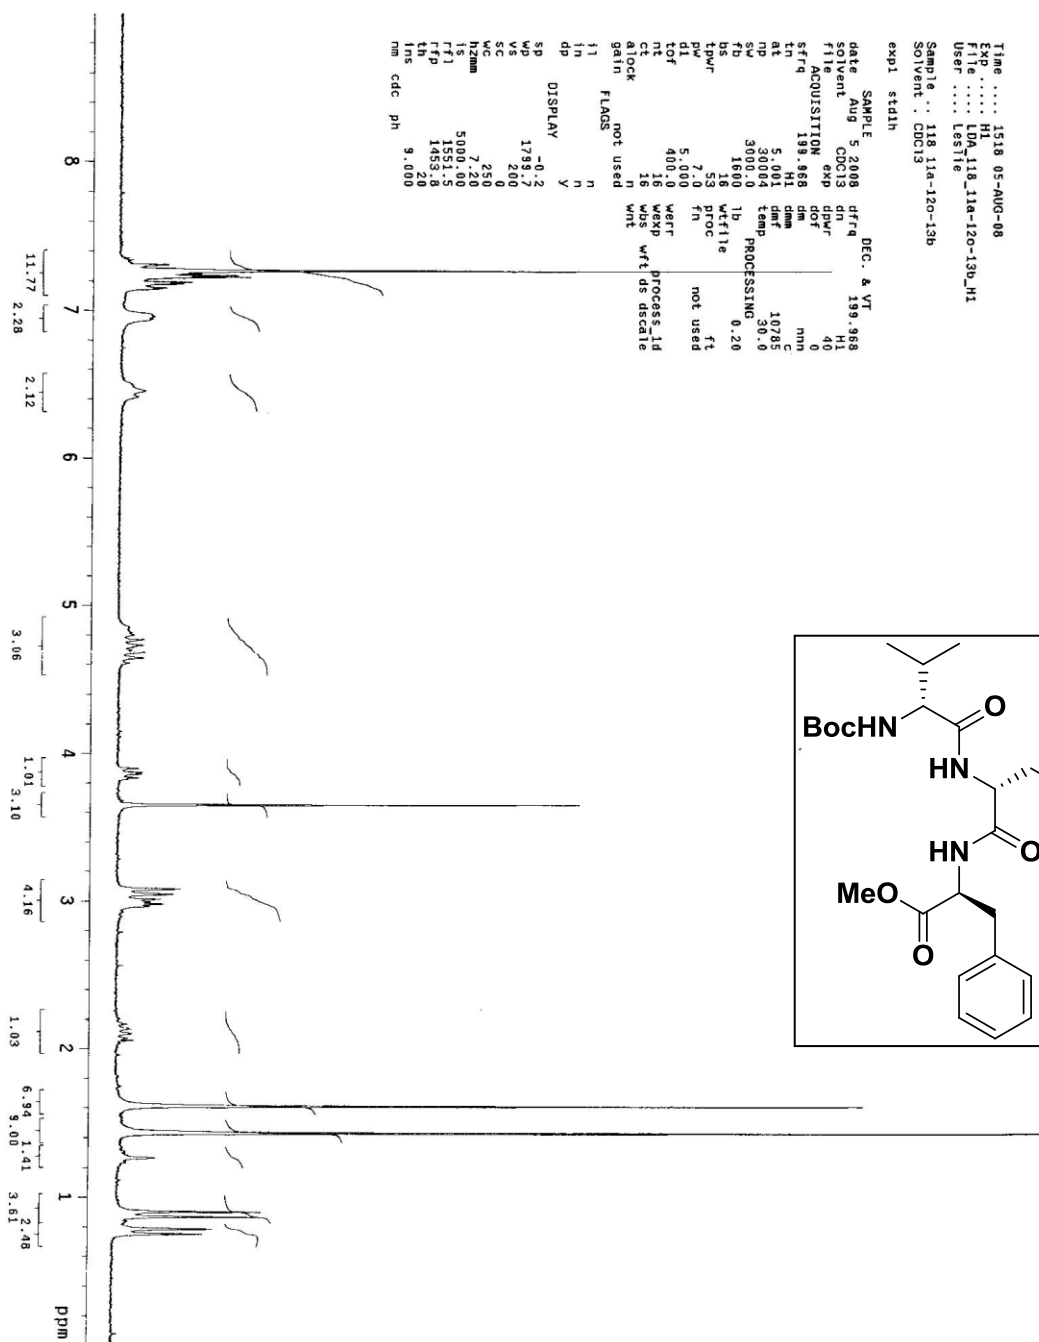

Compound 18 NMR Tripeptide MeO-Phe-D-Phe-D-Val-NHBoc

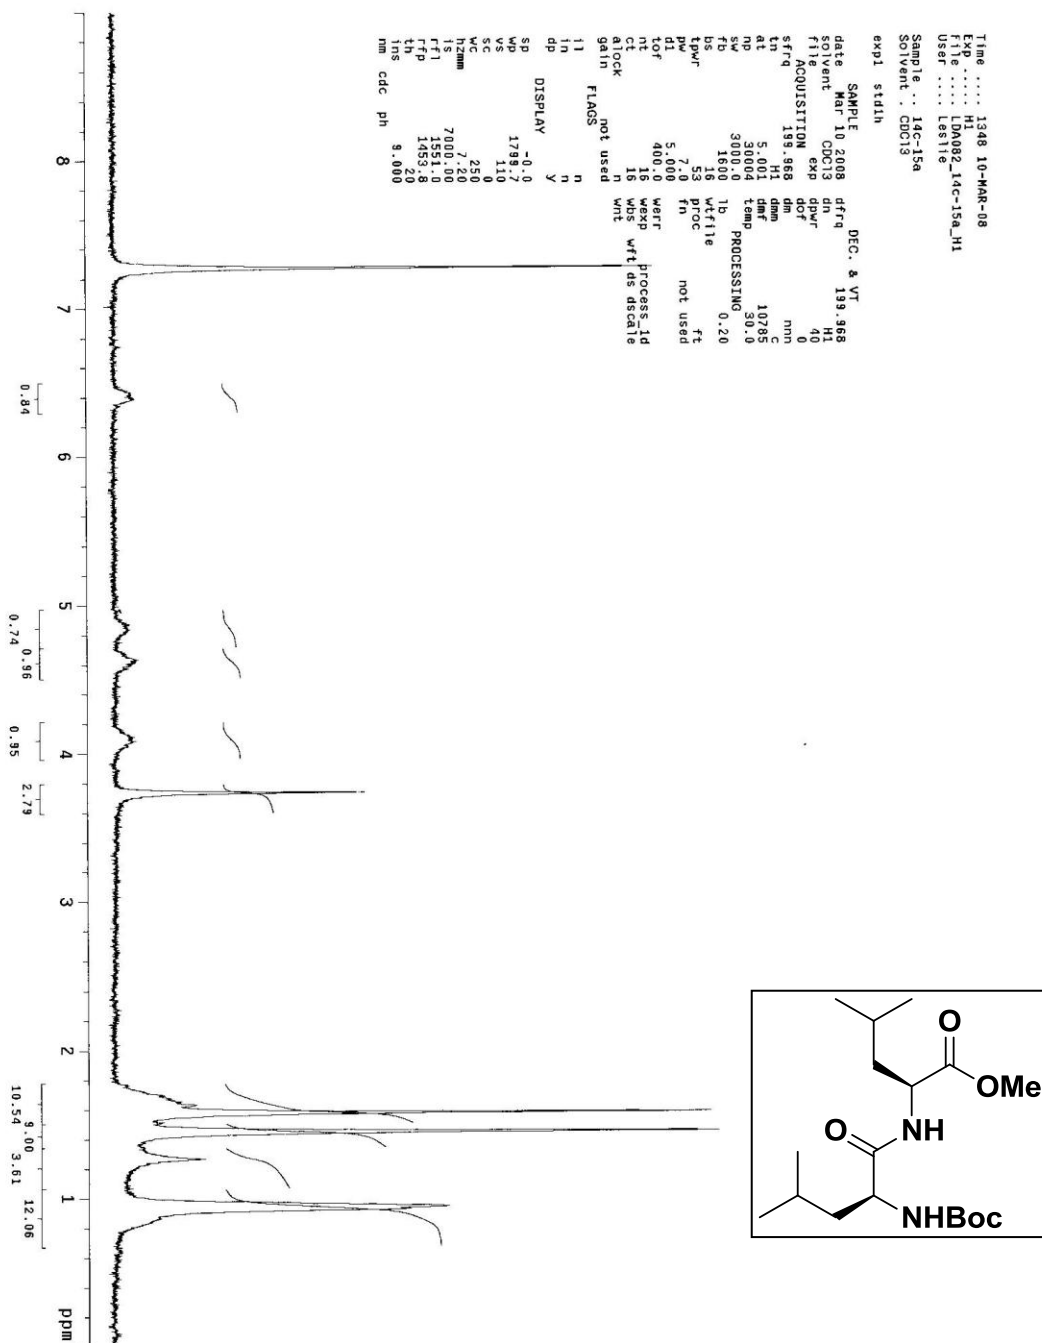

Compound 18 NMR Dipeptide MeO-Leu-Leu-NHBoc

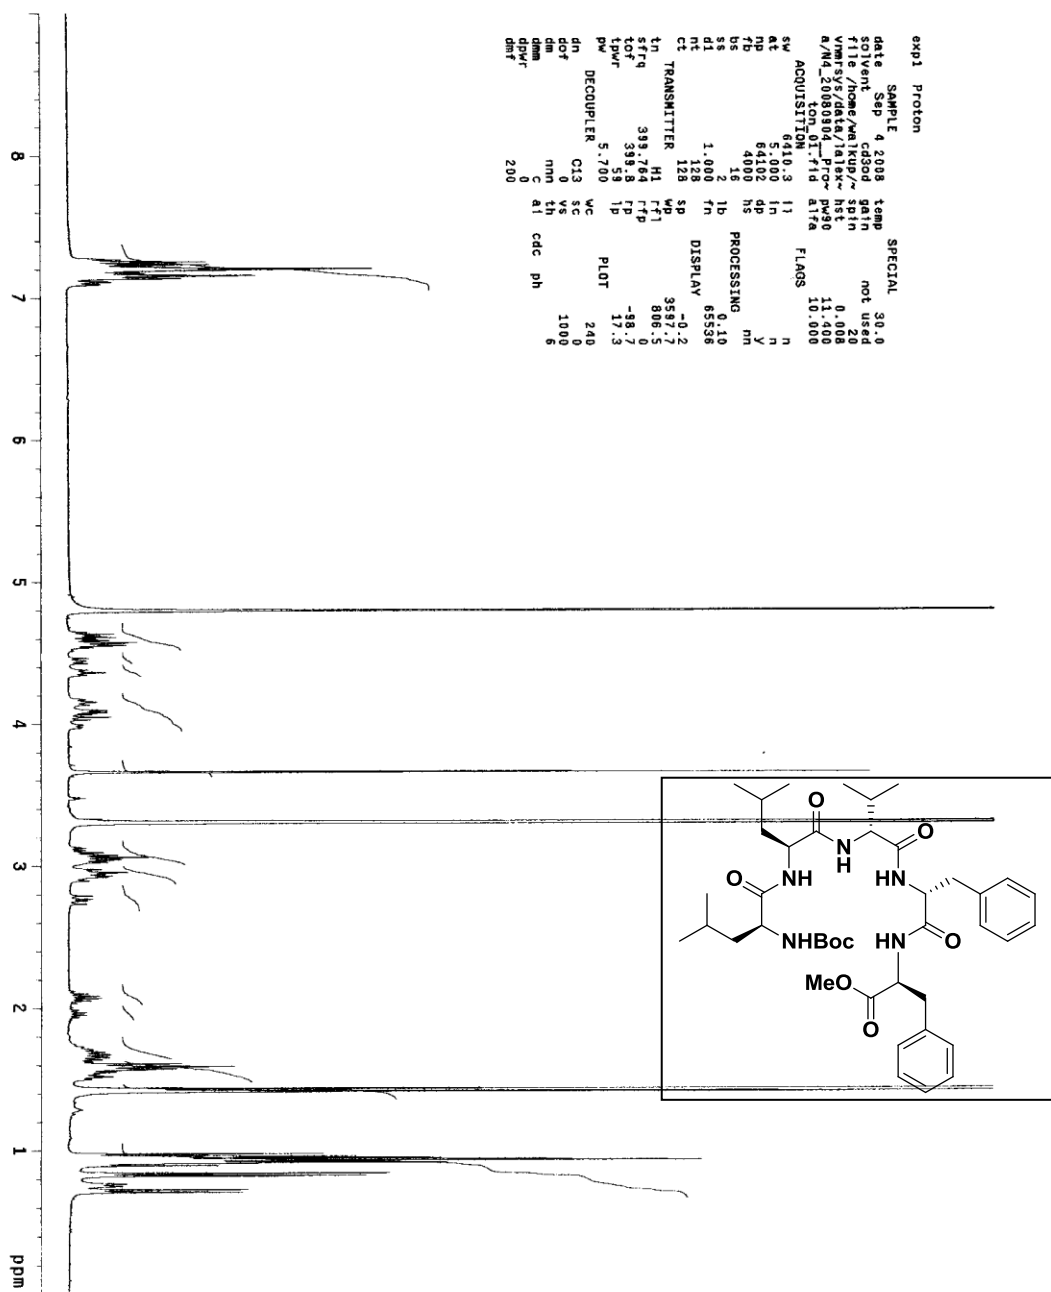

Compound 18 NMR Linear Pentapeptide MeO-Phe-D-Phe-D-Val-Leu-Leu-NHBoc

## Display Report - All Windows Selected Analysis

Analysis Name: LDA\_128\_131LP. Instrument: Agilent 6330 Ion Trap. Print Date: 9/10/2008 11:13:12 AM  
Method: SANA.M D. Operator: sdsu. Acq. Date: 9/9/2008 7:19:49 PM  
Sample Name: LDA\_128\_131lp  
Analysis Info:

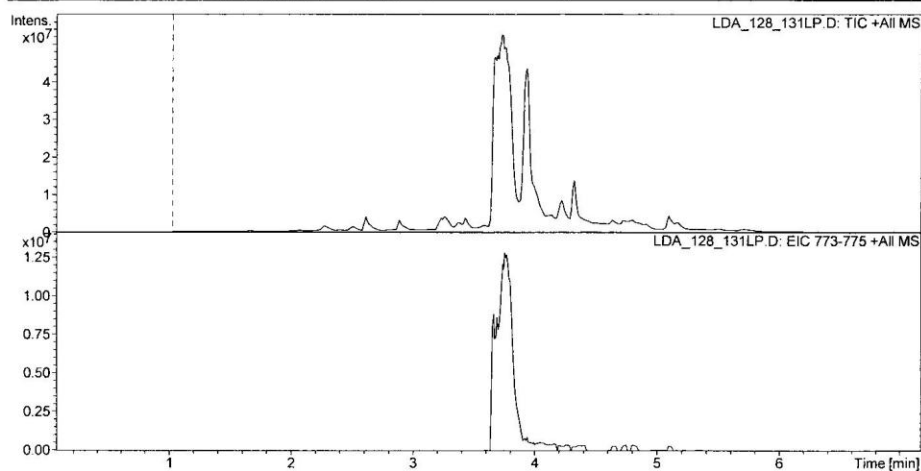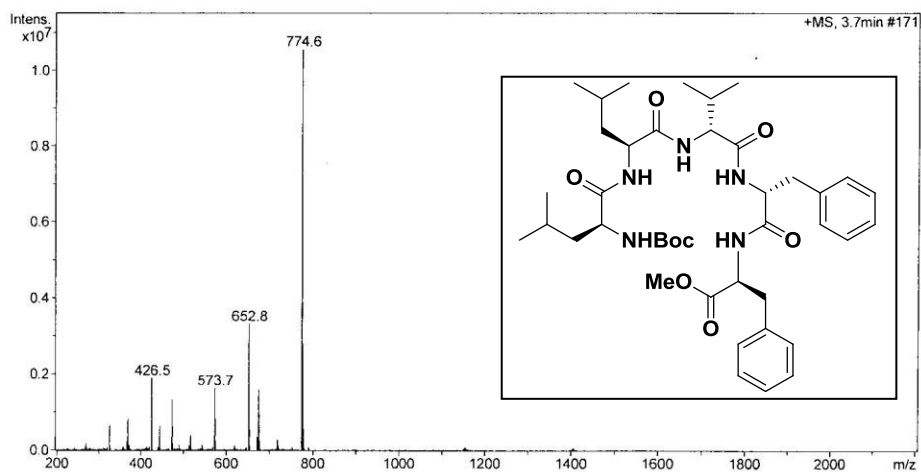

Compound 18 LCMS Linear Pentapeptide MeO-Phe-D-Phe-D-Val-Leu-Leu-NHBoc (MW=752)

## Display Report - All Windows Selected Analysis

Analysis Name: LDA\_132\_131DD Instrument: Agilent 6330 Ion Trap Print Date: 9/9/2008 4:58:50 PM  
Method: SANA.M.D Operator: sdsu Acq. Date: 9/9/2008 4:19:37 PM  
Sample Name: LDA\_132\_131dd  
Analysis Info:

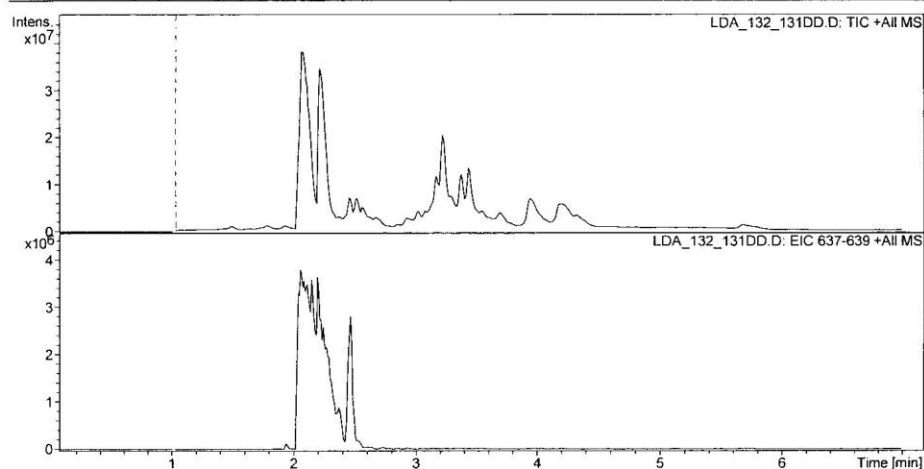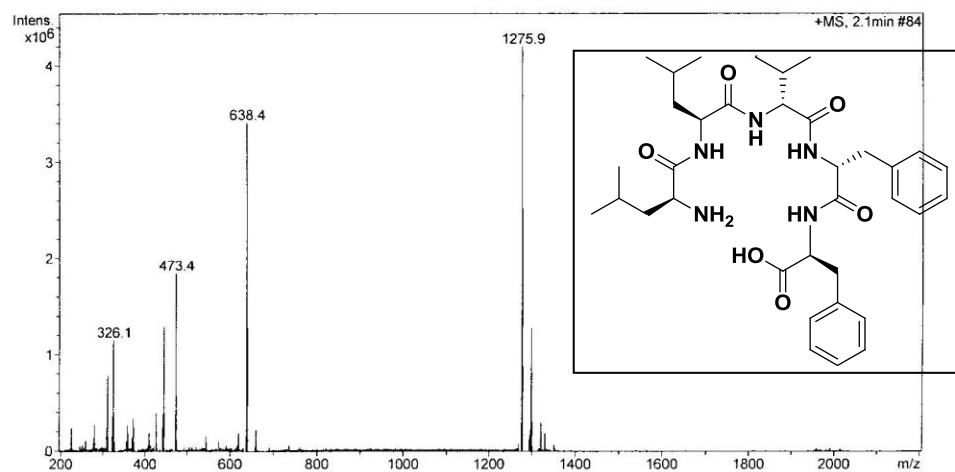

**Compound 18 LCMS Double Deprotected Linear Pentapeptide HO-Phe-D-Phe-D-Val-Leu-Leu-NH<sub>2</sub> (MW=638)**

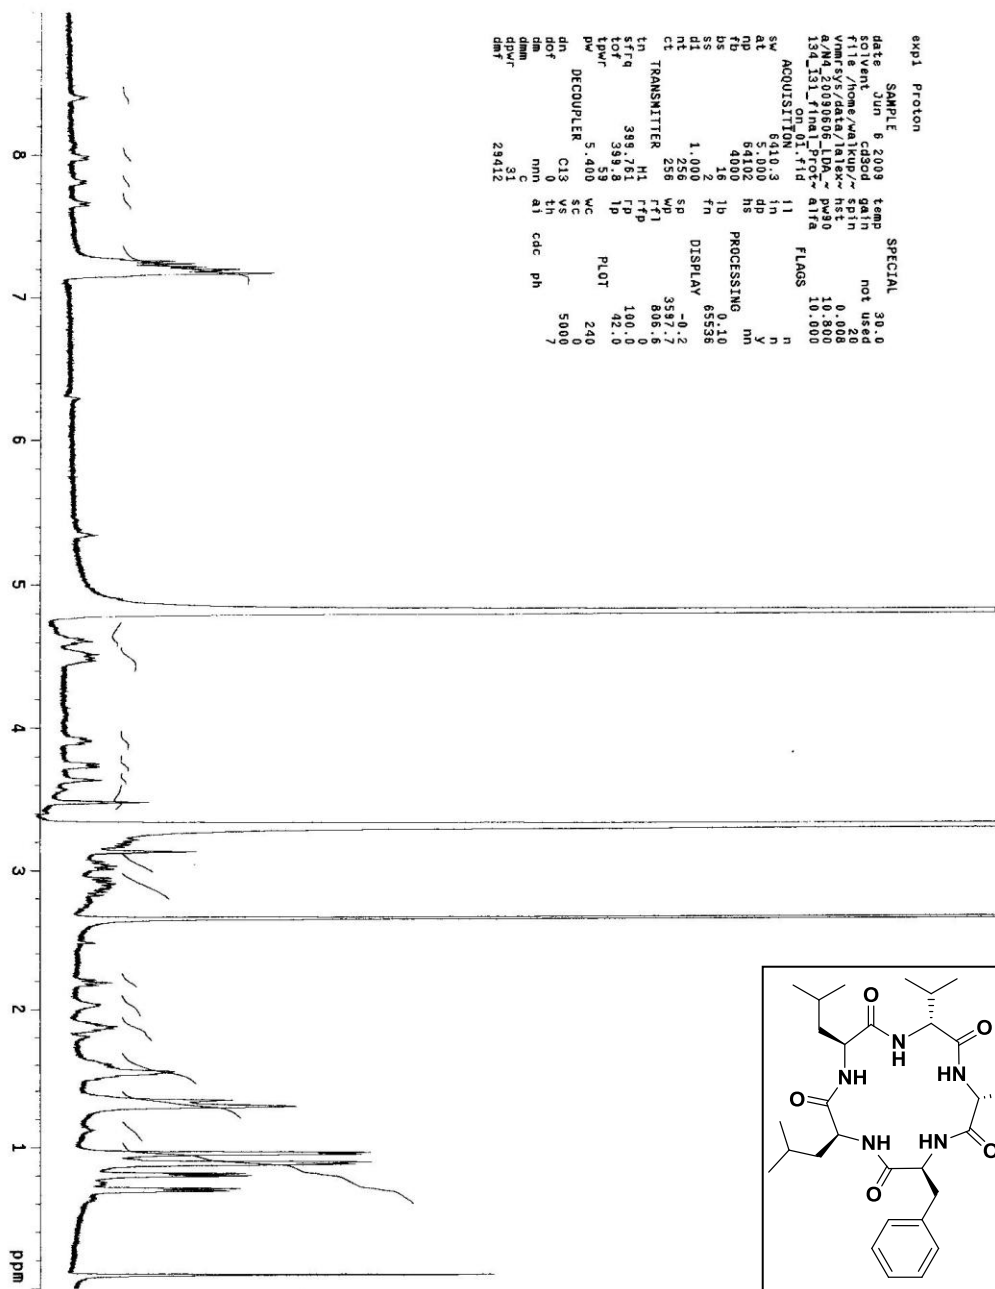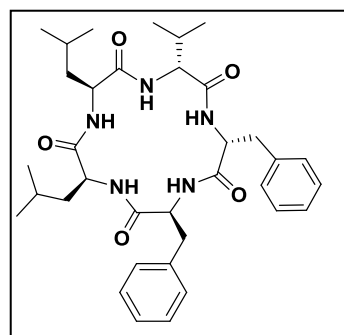

Compound 18 NMR Cyclized Pentapeptide Phe-D-Phe-D-Val-Leu-Leu

## Display Report - All Windows Selected Analysis

**Analysis Name:** LDA\_131\_HPLC2 **Instrument:** Agilent 6330 Ion Trap **Print Date:** 6/24/2009 2:54:13 PM  
**Method:** SANA.M\_F51.D **Operator:** sdsu **Acq. Date:** 5/9/2009 1:09:43 PM  
**Sample Name:** LDA\_131\_hplc2\_f51  
**Analysis Info:**

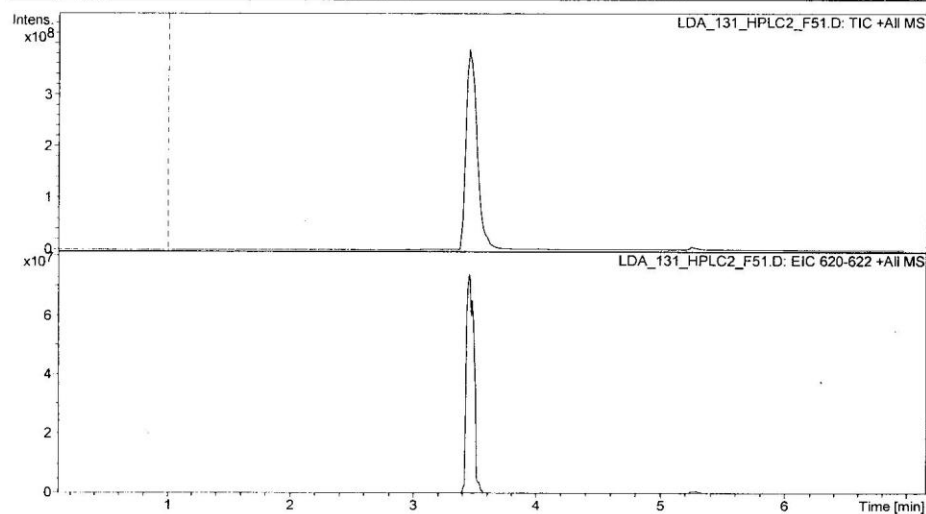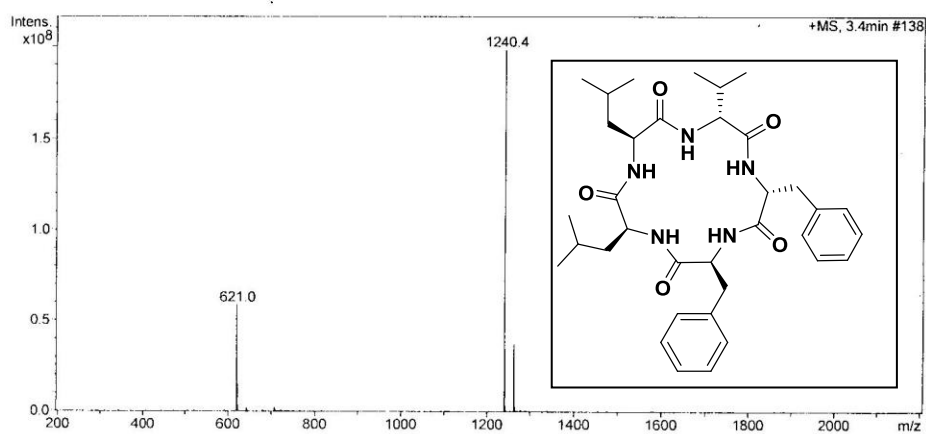

**Compound 18 LCMS Cyclized Pentapeptide Phe-D-Phe-D-Val-Leu-Leu (MW=620)**

SDSU

Project Name: Defaults  
Reported by User: System

Breeze

| SAMPLE INFORMATION |               |                   |                      |
|--------------------|---------------|-------------------|----------------------|
| Sample Name:       | LDA_131_final | Acquired By:      | System               |
| Sample Type:       | Unknown       | Sample Set Name:  |                      |
| Vial:              | 1             | Acq. Method:      | primary_sanA_ss_ACN  |
| Injection #:       | 333           | Date Acquired:    | 6/1/2009 11:08:15 AM |
| Run Time:          | 16.00 Minutes | Injection Volume: | 30.00 ul             |

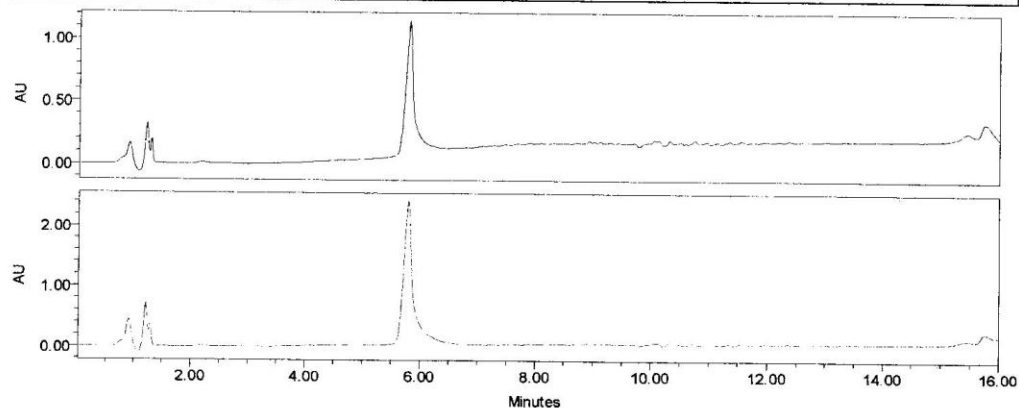

Channel: 2487Channel 1 Channel Desc.: Processing Method: \*\*\*\*  
 Channel: 2487Channel 2 Channel Desc.: Processing Method: \*\*\*\*

| Peak Name | RT (min) | Area ( $\mu\text{V}\cdot\text{sec}$ ) | % Area | Height ( $\mu\text{V}$ ) | Amount | Units |
|-----------|----------|---------------------------------------|--------|--------------------------|--------|-------|
| 1 ****    | ****     | ****                                  | ****   | ****                     | ****   | ****  |
| 2 ****    | ****     | ****                                  | ****   | ****                     | ****   | ****  |

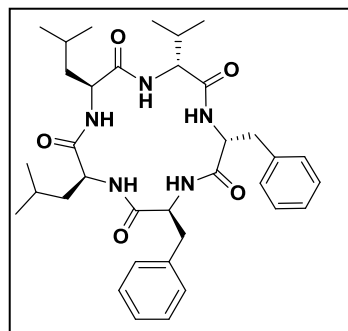

## Compound 18 HPLC Cyclized Pentapeptide Phe-D-Phe-D-Val-Leu-Leu



## Display Report - All Windows Selected Analysis

**Analysis Name:** TS\_178\_LINEAR. **Instrument:** Agilent 6330 Ion Trap **Print Date:** 9/24/2009 3:52:58 PM  
**Method:** SANA.M D **Operator:** sdsu **Acq. Date:** 8/30/2009 11:43:55 AM  
**Sample Name:** ts\_178\_linear  
**Analysis Info:**

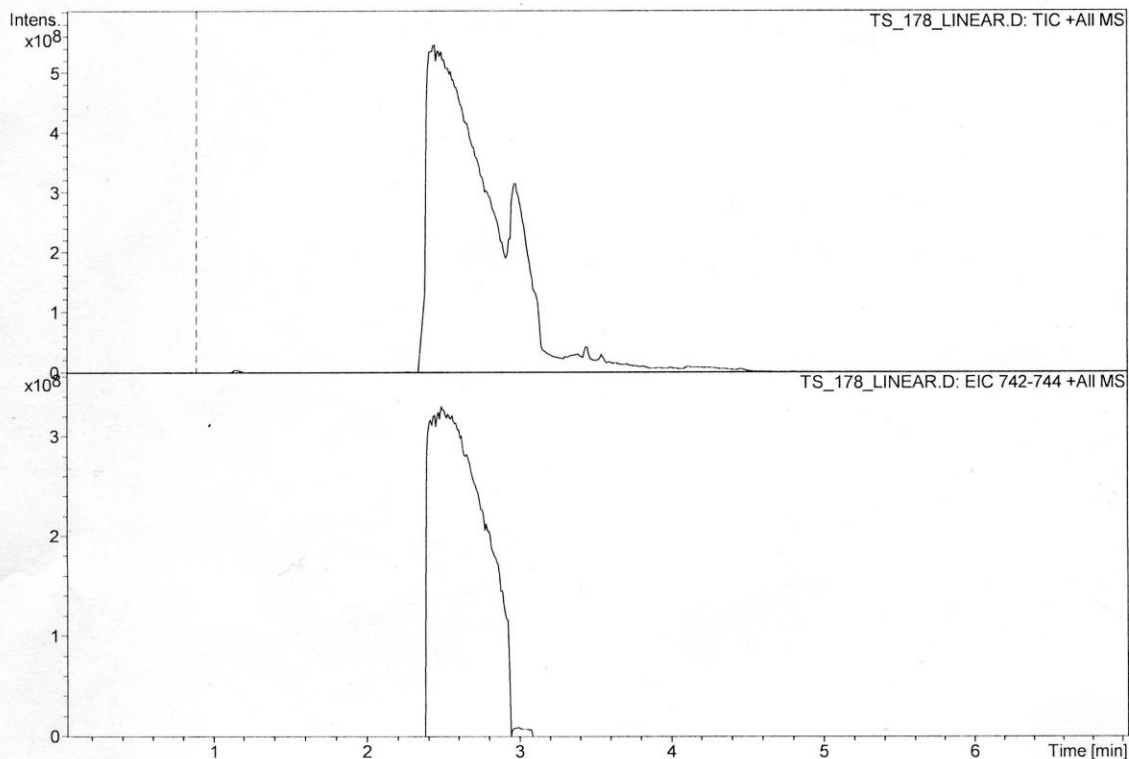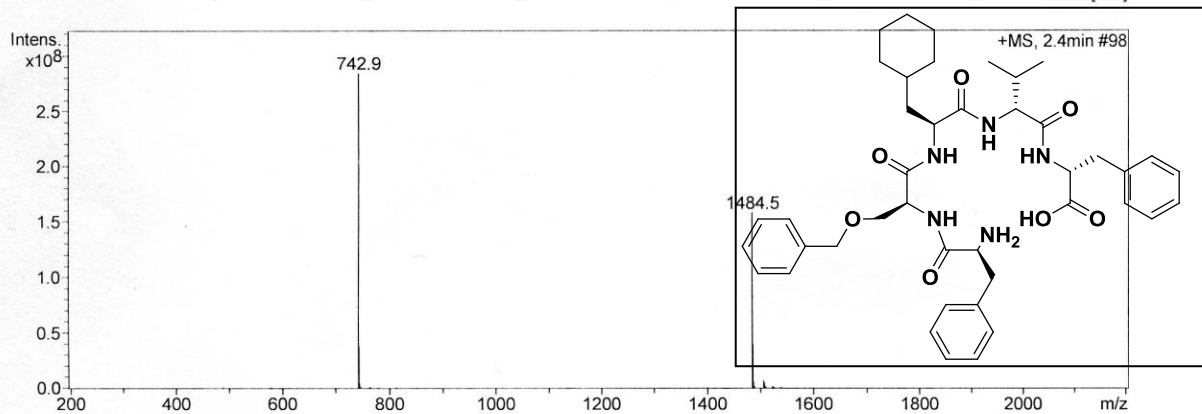

**Compound 20 LCMS Double Deprotected Linear Pentapeptide HO-D-Phe-D-Val-Cha-Ser(Bzl)-Phe-NH<sub>2</sub> (MW=742)**

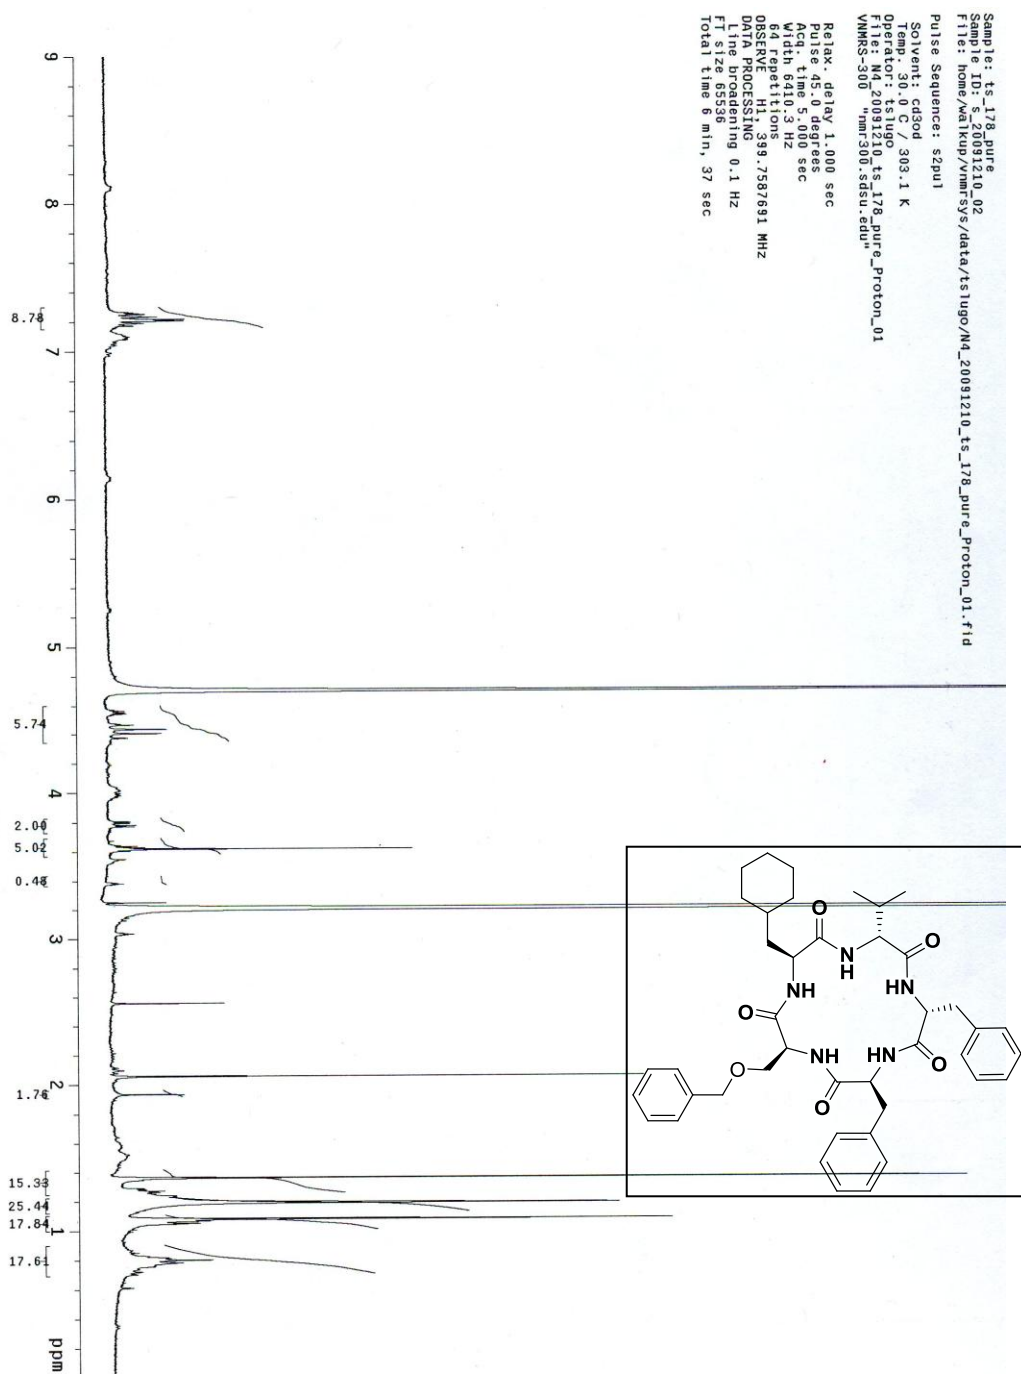

Compound 20 NMR Cyclized Pentapeptide Phe-D-Phe-D-Val-Cha-Ser(Bzl)

## Display Report - All Windows Selected Analysis

**Analysis Name:** TS\_178\_PURE.D **Instrument:** Agilent 6330 Ion Trap **Print Date:** 9/15/2009 3:54:16 PM  
**Method:** SANA.M **Operator:** sdsu **Acq. Date:** 9/15/2009 3:46:00 PM  
**Sample Name:** ts\_178\_pure  
**Analysis Info:**

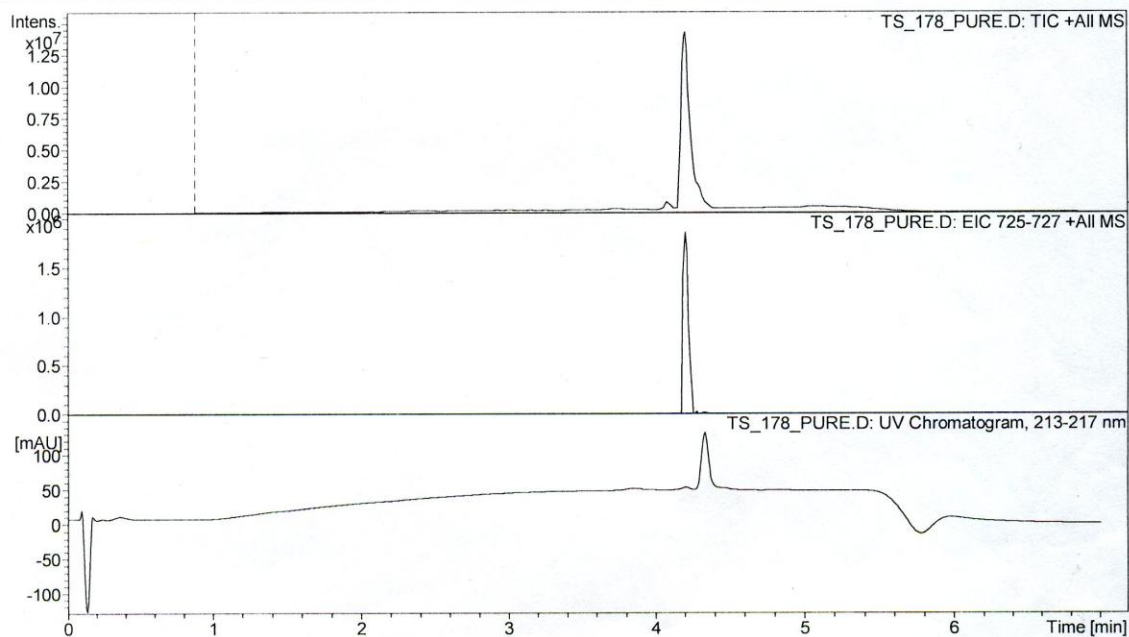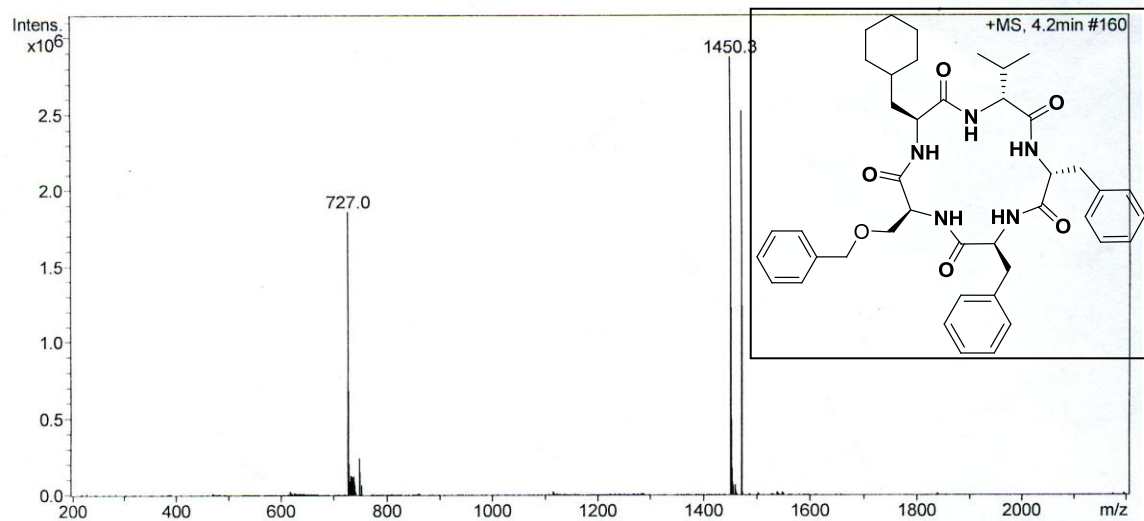

**Compound 20 LCMS Cyclized Pentapeptide Phe-D-Phe-D-Val-Cha-Ser(Bzl) (MW=726)**

## SDSU

Project Name: Defaults  
Reported by User: System

Breeze

## SAMPLE INFORMATION

|              |               |                   |                      |
|--------------|---------------|-------------------|----------------------|
| Sample Name: | ts_178_sspure | Acquired By:      | System               |
| Sample Type: | Unknown       | Sample Set Name:  |                      |
| Vial:        | 1             | Acq. Method:      | primary_sanA_ss_ACN  |
| Injection #: | 157           | Date Acquired:    | 9/14/2009 2:43:44 PM |
| Run Time:    | 16.00 Minutes | Injection Volume: | 90.00 ul             |

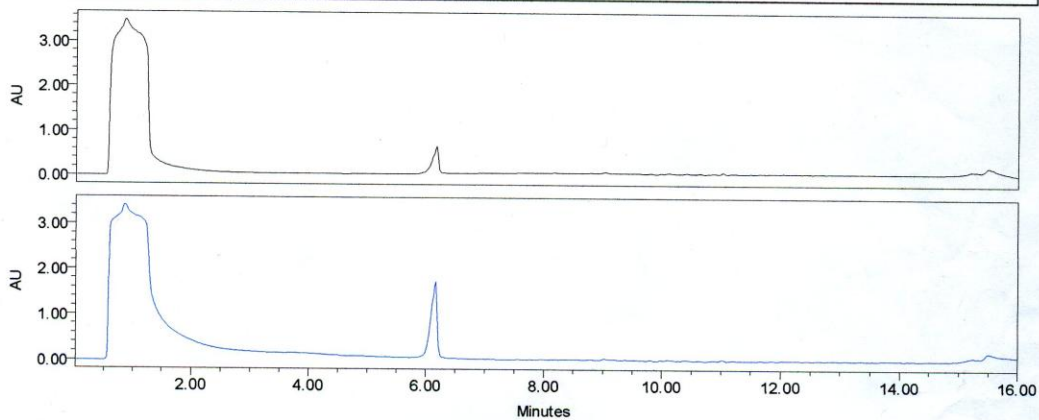

— Channel: 2487Channel 1 Channel Desc.: Processing Method: \*\*\*\*  
— Channel: 2487Channel 2 Channel Desc.: Processing Method: \*\*\*\*

| Peak Name | RT (min) | Area (μV*sec) | % Area | Height (μV) | Amount | Units |
|-----------|----------|---------------|--------|-------------|--------|-------|
| 1         | ****     | ****          | ****   | ****        | ****   | ****  |
| 2         | ****     | ****          | ****   | ****        | ****   | ****  |

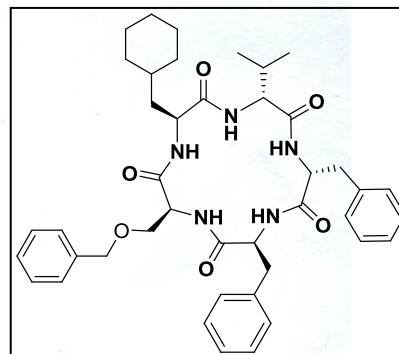

## Compound 20 HPLC Cyclized Pentapeptide Phe-D-Phe-D-Val-Cha-Ser(Bzl)

## Display Report - All Windows Selected Analysis

**Analysis Name:** TS\_114\_LP.D    **Instrument:** Agilent 6330 Ion Trap    **Print Date:** 11/30/2009 2:44:14 PM  
**Method:** SANA.M    **Operator:** sdsu    **Acq. Date:** 11/12/2009 3:20:28 PM  
**Sample Name:** ts\_114\_LP  
**Analysis Info:**

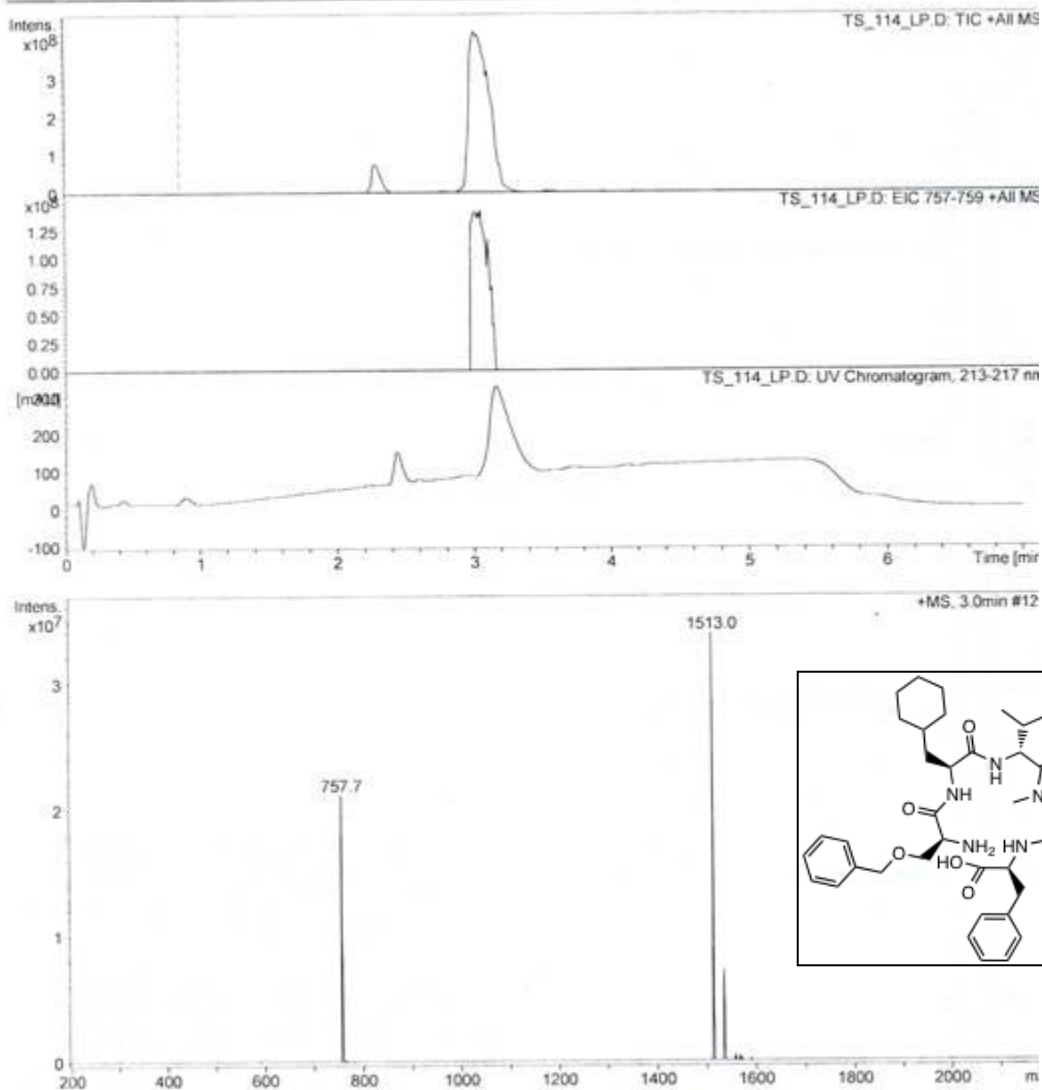

**Compound 21 LCMS Double Deprotected Pentapeptide HO-Phe-N-Me-D-Phe-D-Val-Cha-Ser(Bzl)-NH<sub>2</sub> (MW=757)**

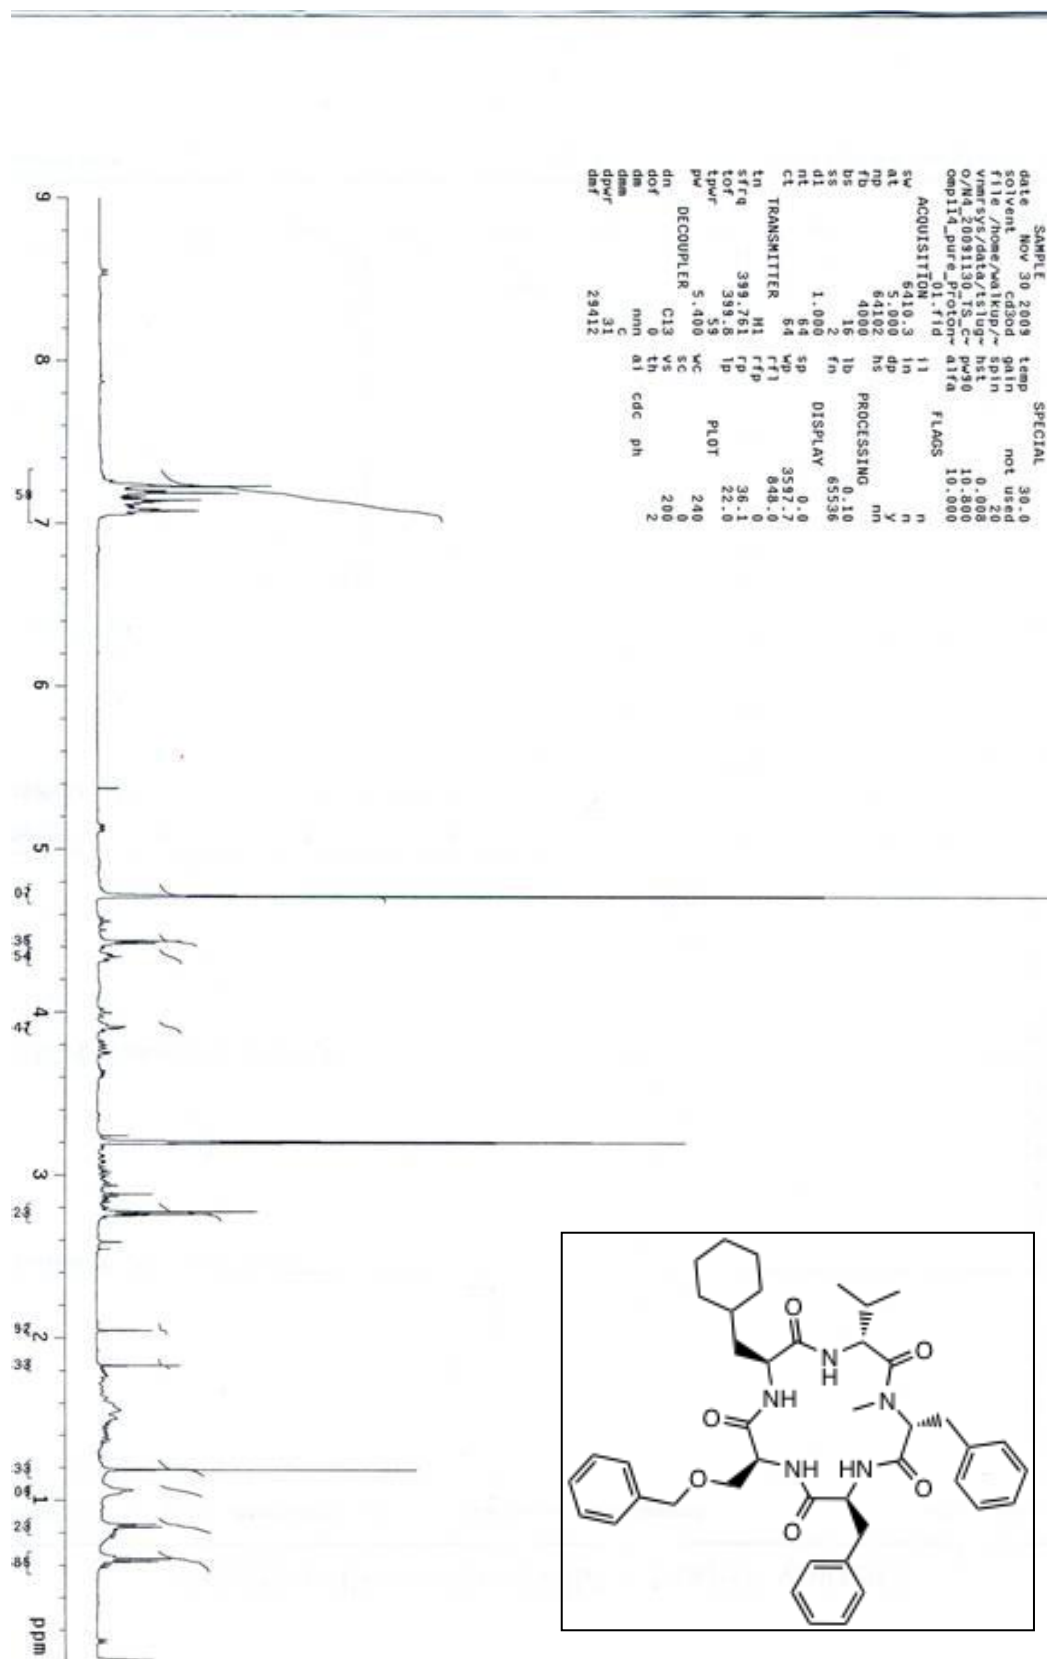

Compound 21 NMR Cyclized Protected Pentapeptide Phe-N-Me-D-Phe-D-Val-Cha-Ser(Bzl)

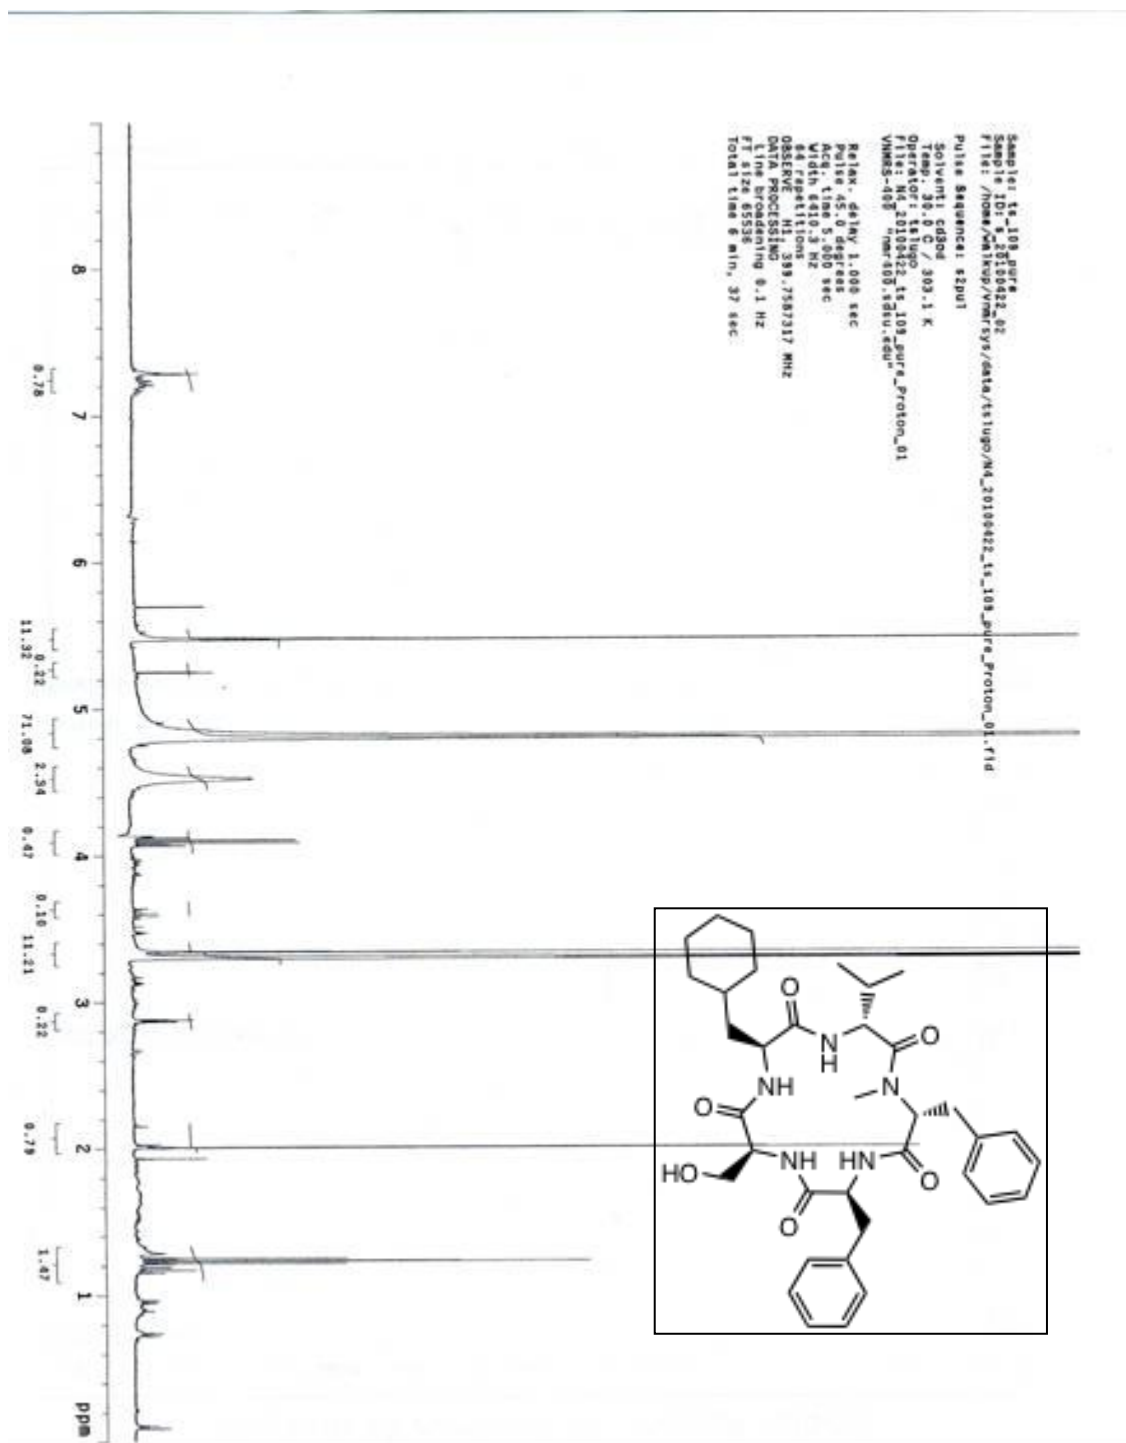

Compound 21 NMR Cyclized Pentapeptide Phe-N-Me-D-Phe-D-Val-Cha-Ser



## Display Report - All Windows All Analyses

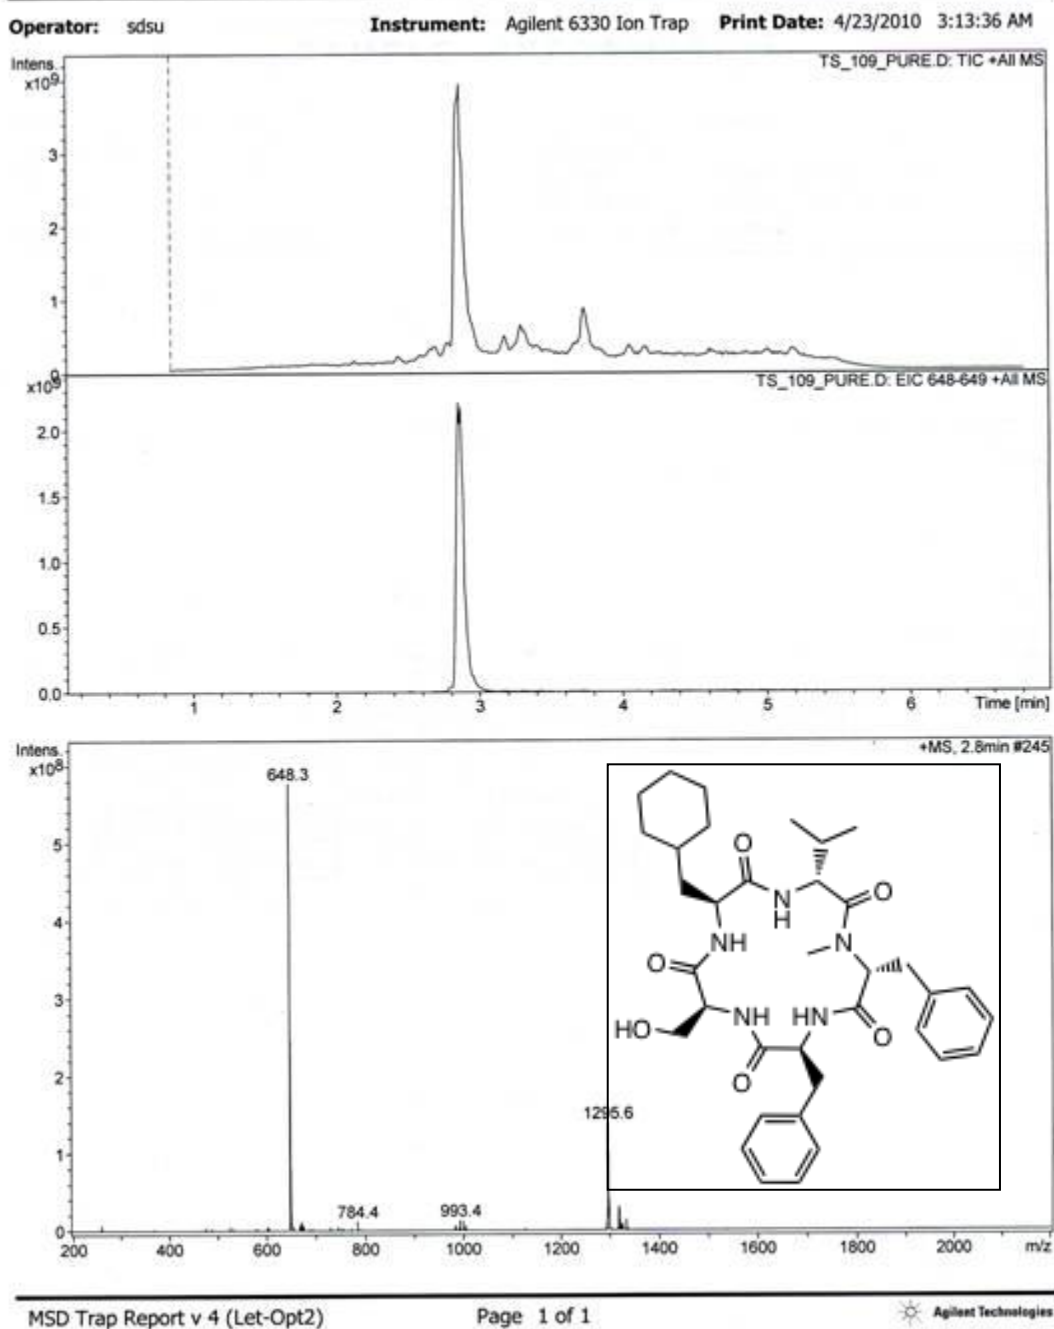

Compound 21 LCMS Cyclized Pentapeptide Phe-N-Me-D-Phe-D-Val-Cha-Ser



SDSU

Project Name: Defaults  
Reported by User: System

Breeze

## SAMPLE INFORMATION

|              |               |                   |                      |
|--------------|---------------|-------------------|----------------------|
| Sample Name: | ts_109_pure   | Acquired By:      | System               |
| Sample Type: | Unknown       | Sample Set Name:  |                      |
| Vial:        | 1             | Acq. Method:      | primary_sanA_ss_ACN  |
| Injection #: | 702           | Date Acquired:    | 4/20/2010 3:28:55 PM |
| Run Time:    | 16.00 Minutes | Injection Volume: | 60.00 ul             |

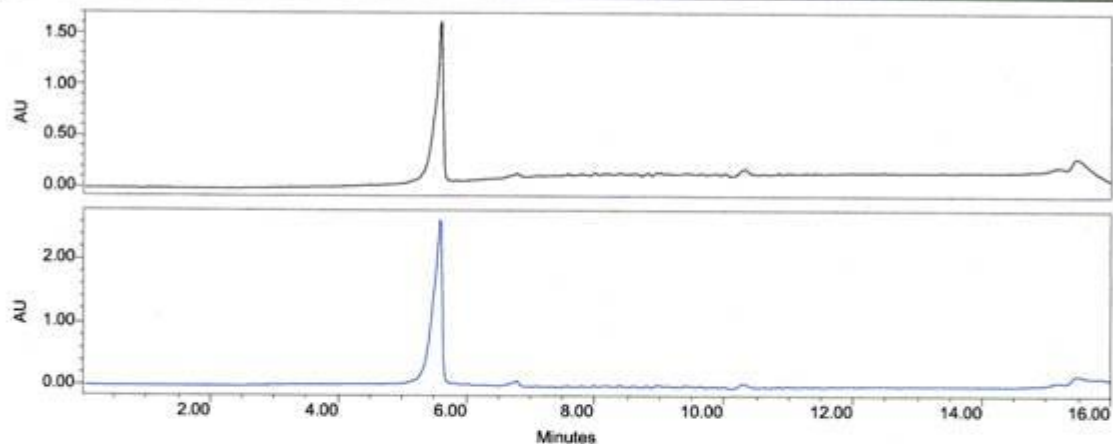

— Channel: 2487Channel 1 Channel Desc.: Processing Method: \*  
 — Channel: 2487Channel 2 Channel Desc.: Processing Method: \*

| Peak Name | RT (min) | Area (V*sec) | % Area | Height (V) | Amount | Units |
|-----------|----------|--------------|--------|------------|--------|-------|
| 1 ****    | ****     | ****         | ****   | ****       | ****   | ****  |
| 2 ****    | ****     | ****         | ****   | ****       | ****   | ****  |

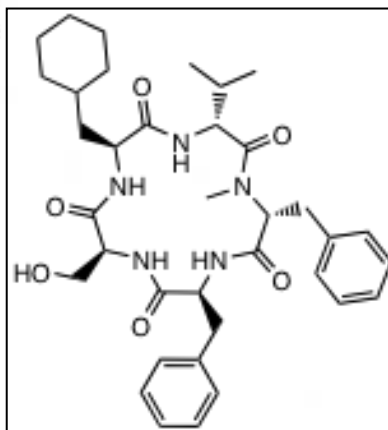

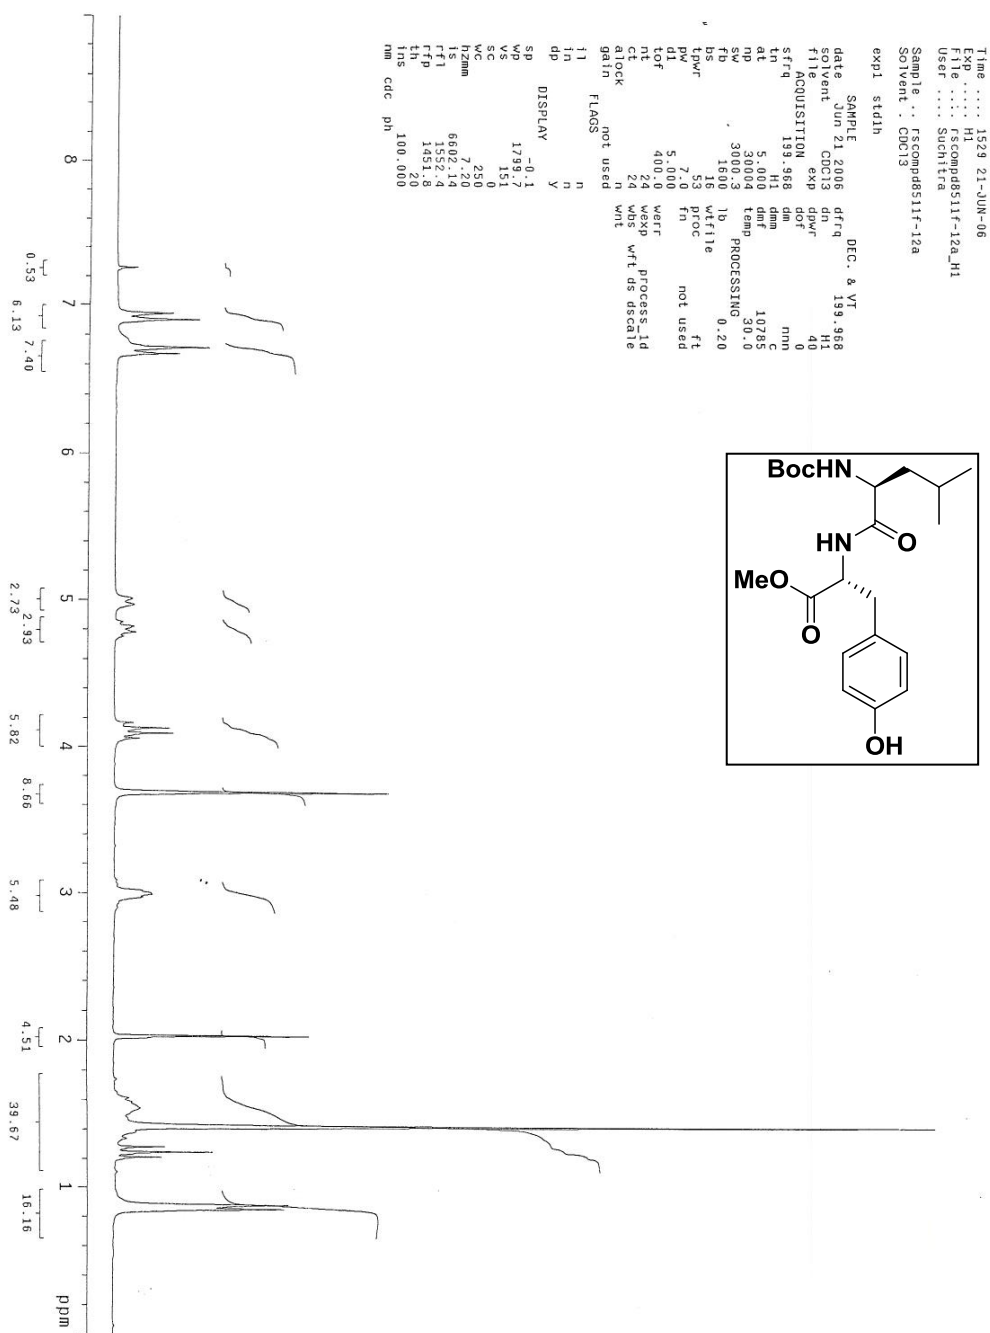

Compound 23 NMR Dipeptide MeO-D-Tyr-Leu-NHBoc

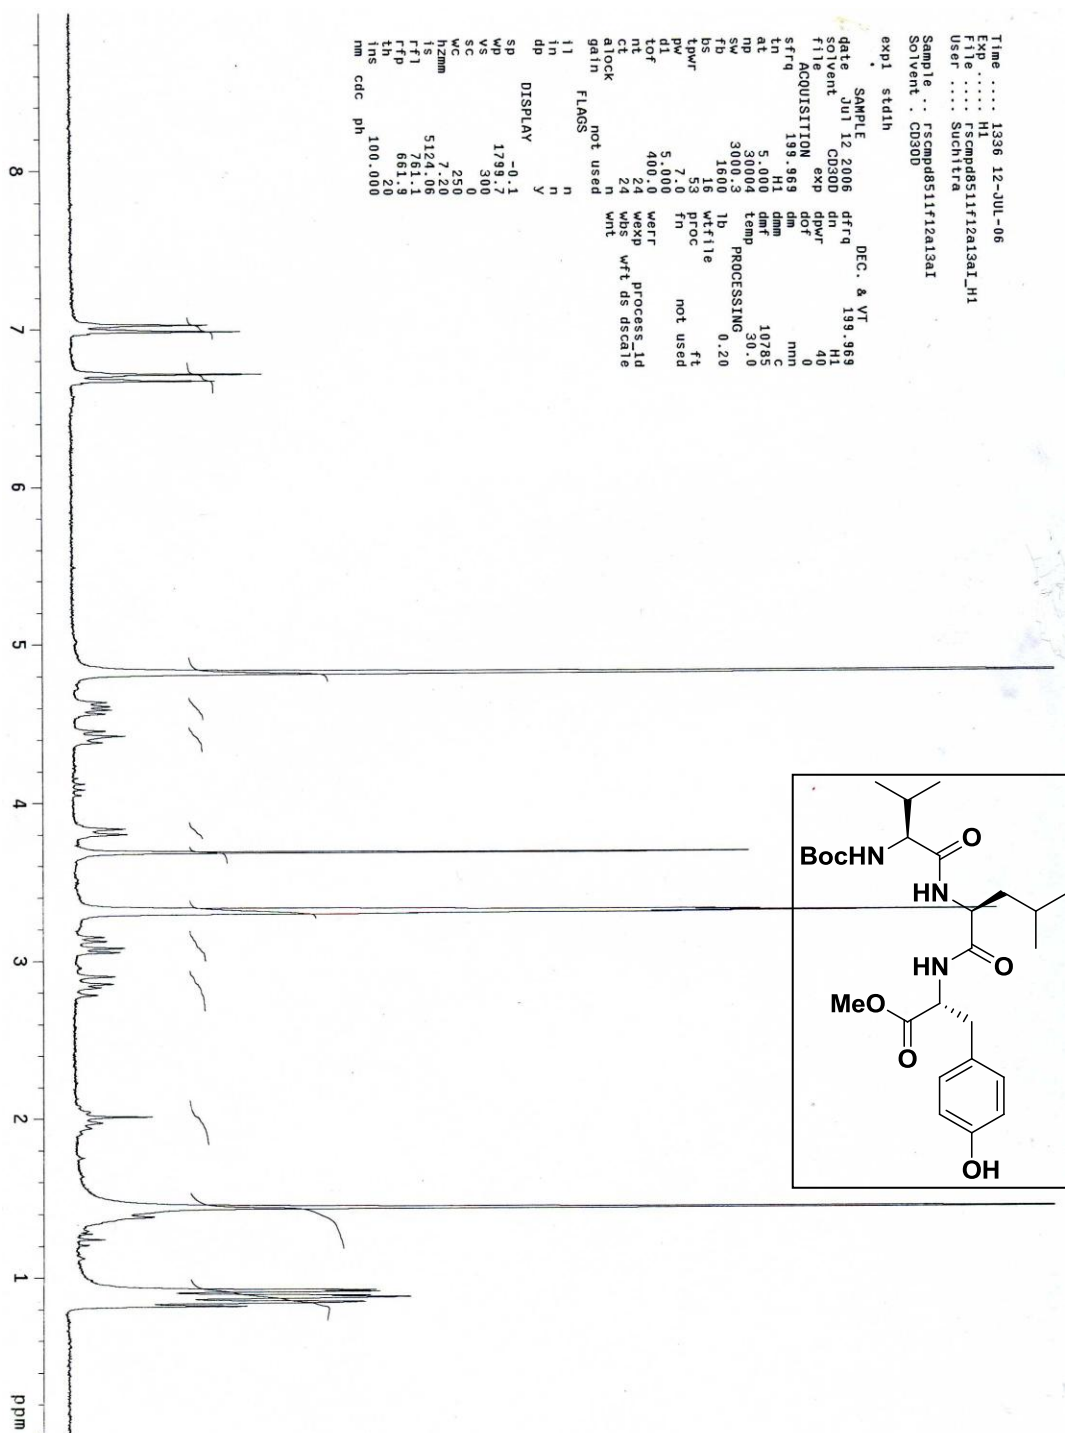

Compound 23 NMR Tripeptide MeO-D-Tyr-Leu-Val-NHBoc

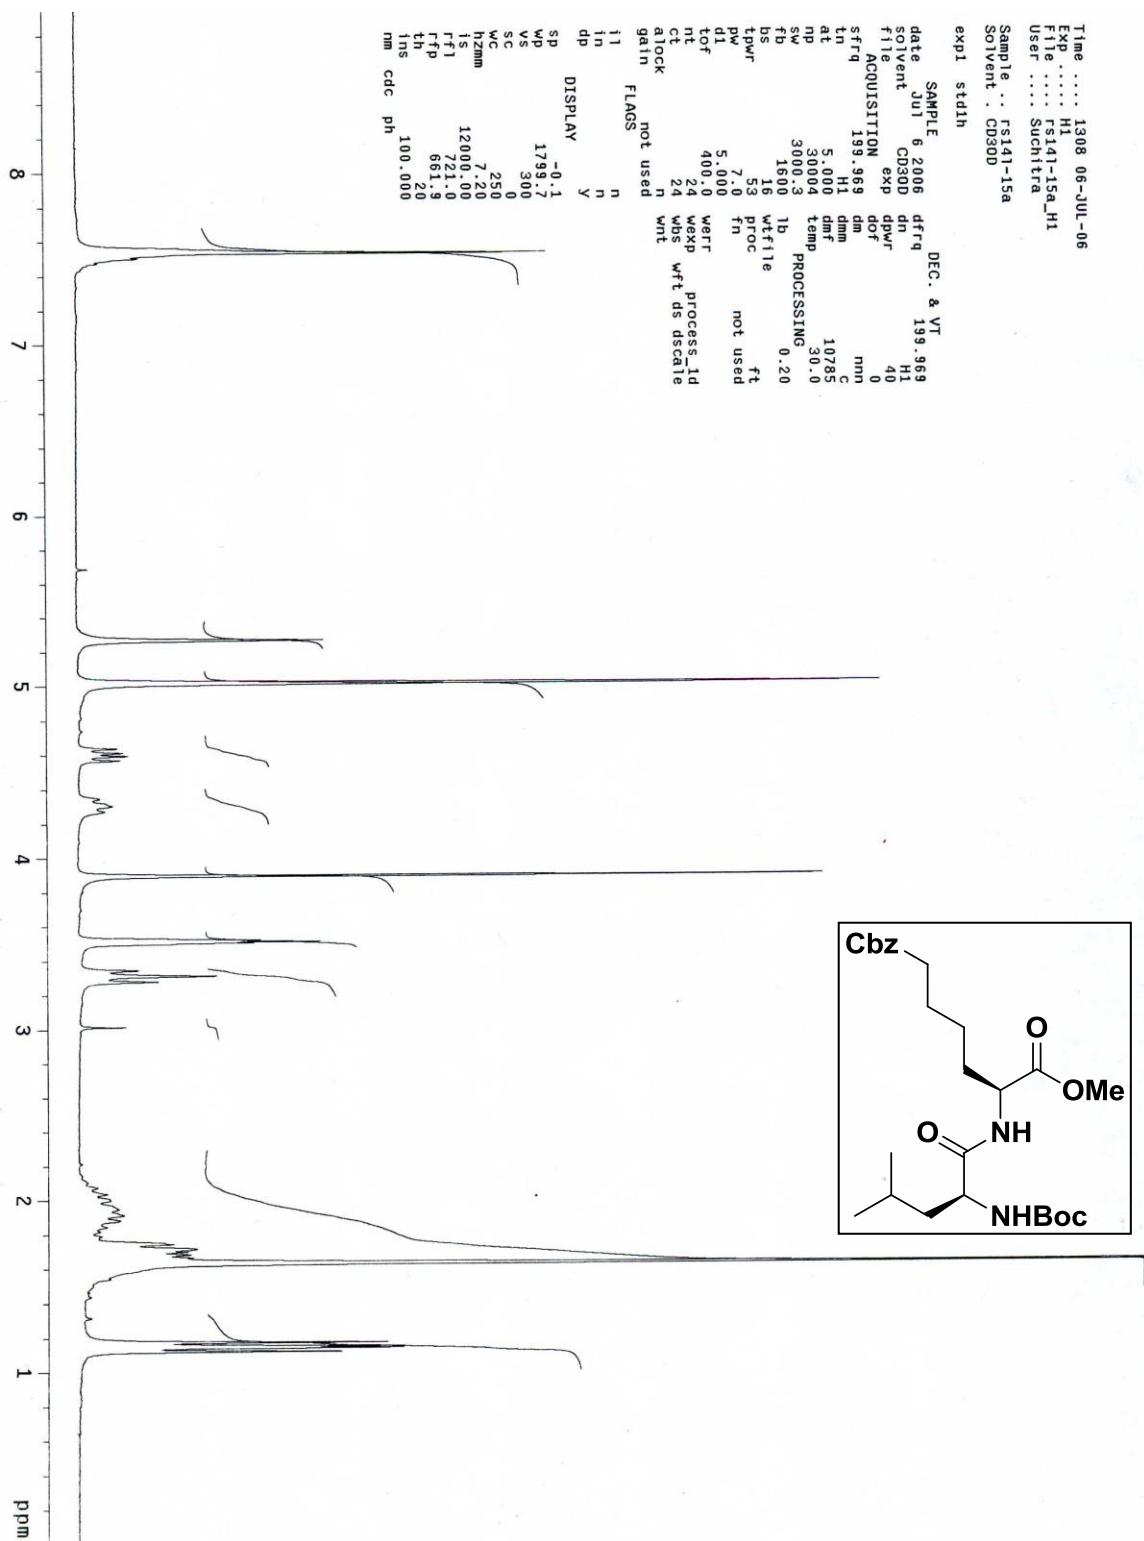

Compound 23 NMR Dipeptide MeO-Lys(Cbz)-Leu-NHBoc

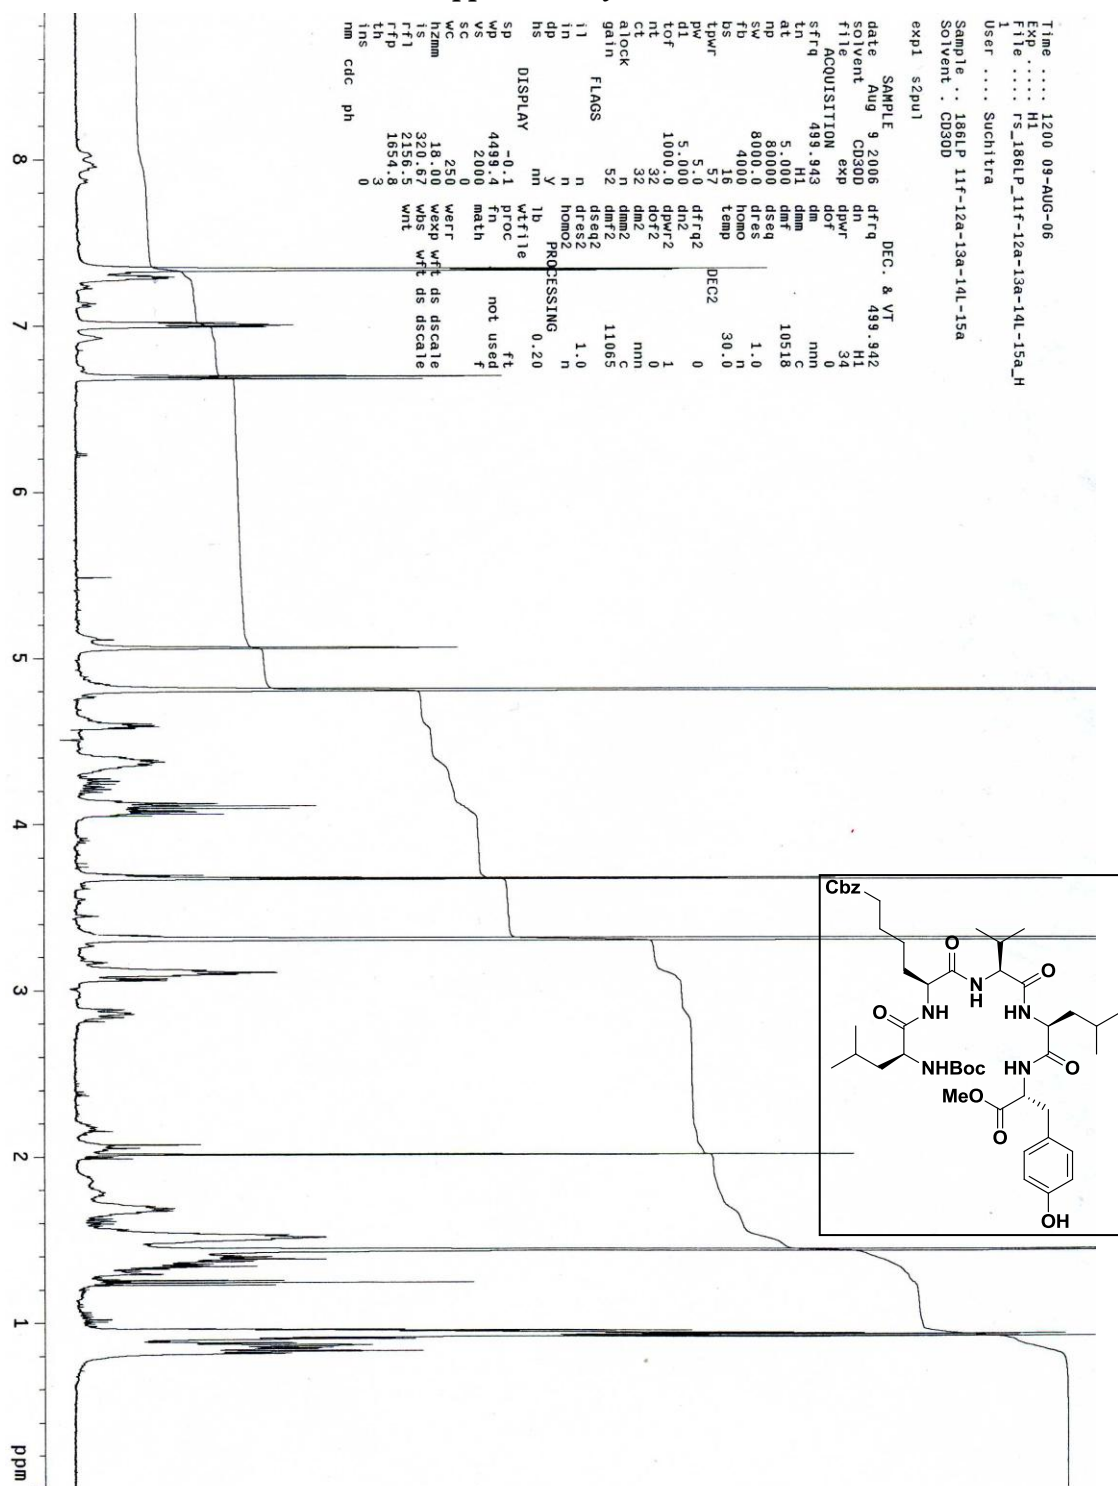

Compound 23 NMR Linear Pentapeptide MeO-D-Tyr-Leu-Val-Lys(Cbz)-Leu-NHBoc

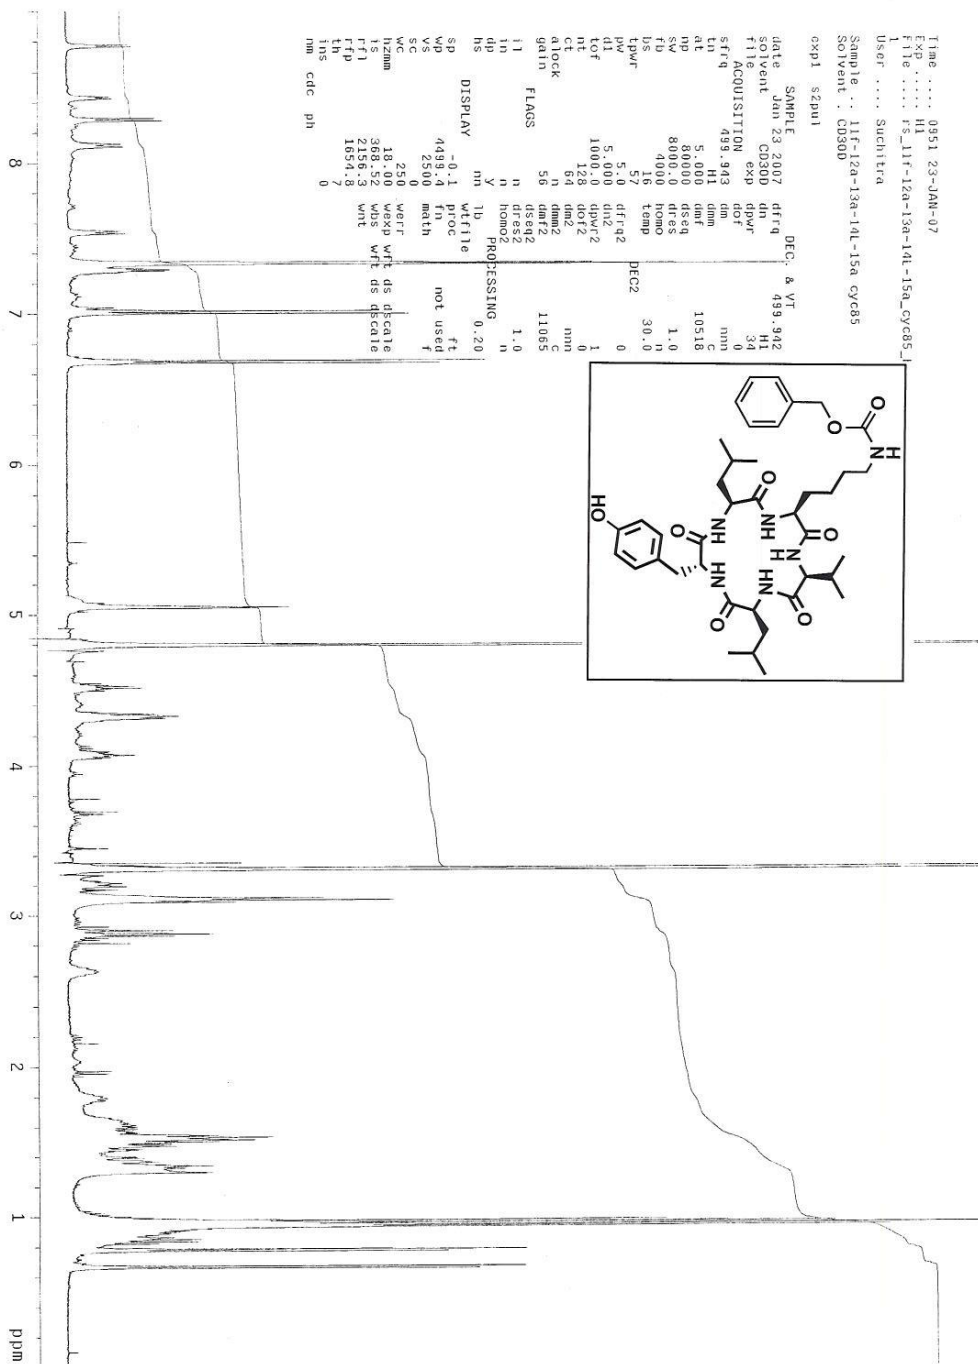

Compound 23 NMR Cyclized Pentapeptide D-Tyr-Leu-Val-Lys(Cbz)-Leu

D:\Department Results\...rscyc85pure  
rscyc85pure

10/19/06 10:29:08 AM

RT: 0.00 - 11.96

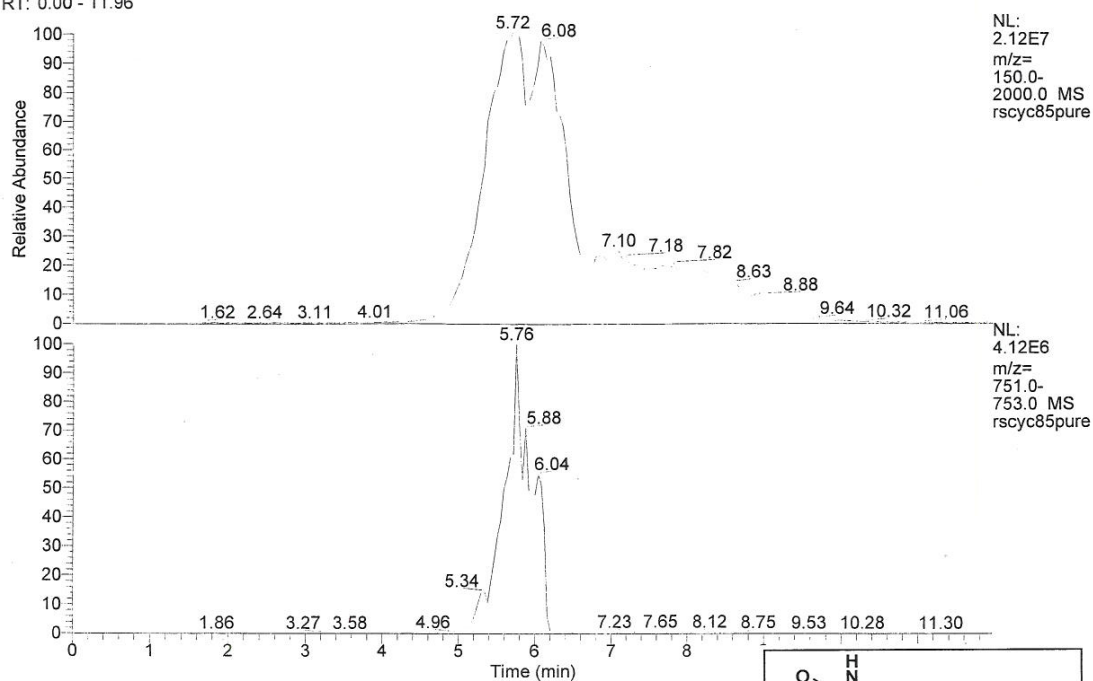rscyc85pure #111 RT: 5.88 AV: 1 NL: 1.92E6  
T: + c ESI Full ms [ 150.00-2000.00]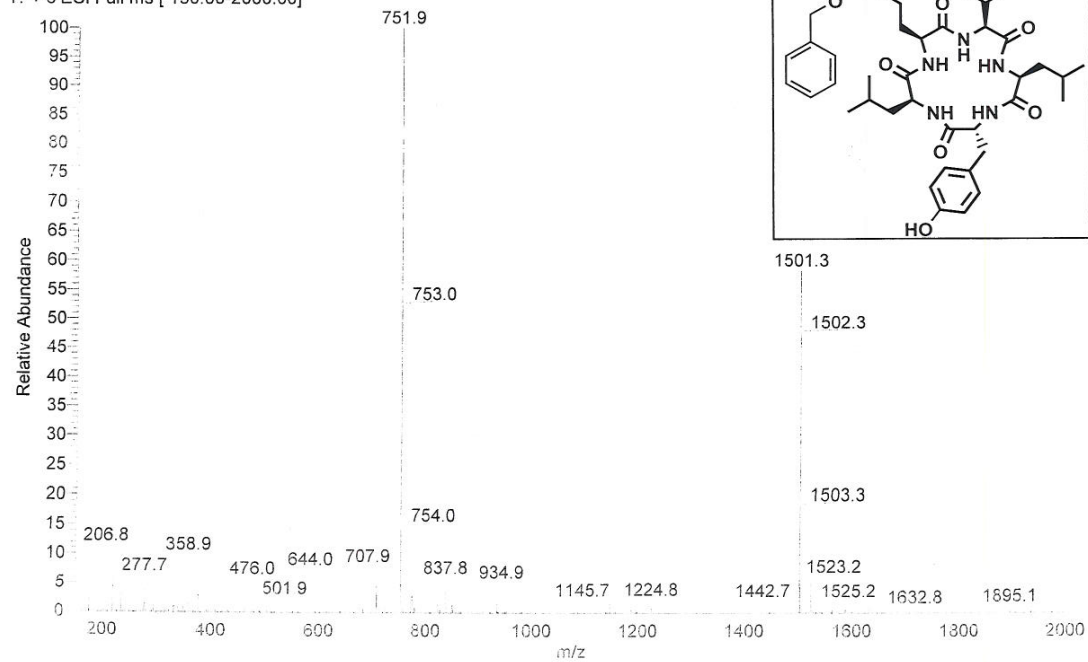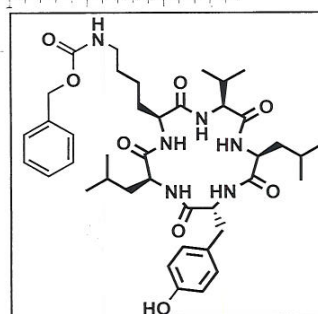

Compound 23 LCMS Cyclized Pentapeptide D-Tyr-Leu-Val-Lys(Cbz)-Leu (MW=751)



```

File ..... fscmpd511f-12a_H1
User ..... Suchitra
Sample .. fscmpd511f-12a
Solvent .. CDCl3
expi stdin

SAMPLE          DEC. & VT
date            un 21 2006  dfrq 199.968
solvent         CDCl3  dn      H1
file           exp      dpr  40
ACQUISITION    dof      0
sfrq           199.968  dm      mm
IN             5.000    dm      10265
NS             30000    temp  30.0
SW             9000.3   PROCESsing 0.20
fb             1800    lb      wftt1e
bs             16      proc  ft
lpwr           7.0    fn      not used
pw            5.000   warr  400.0
tof           400.0   wexp  24
nt            24     wts  wft ds dscate
ct            24     wnt  not used
alock         n
gain         not used
ll           n
in           n
dp           y
DISPLAY      -0.1
SP           1739.7
WP           150
SC           0
WC           250
h2nm        7.20
f1          6602.14
f2          1352.4
lh          1851.20
lns         100.000
nm cdc ph

```

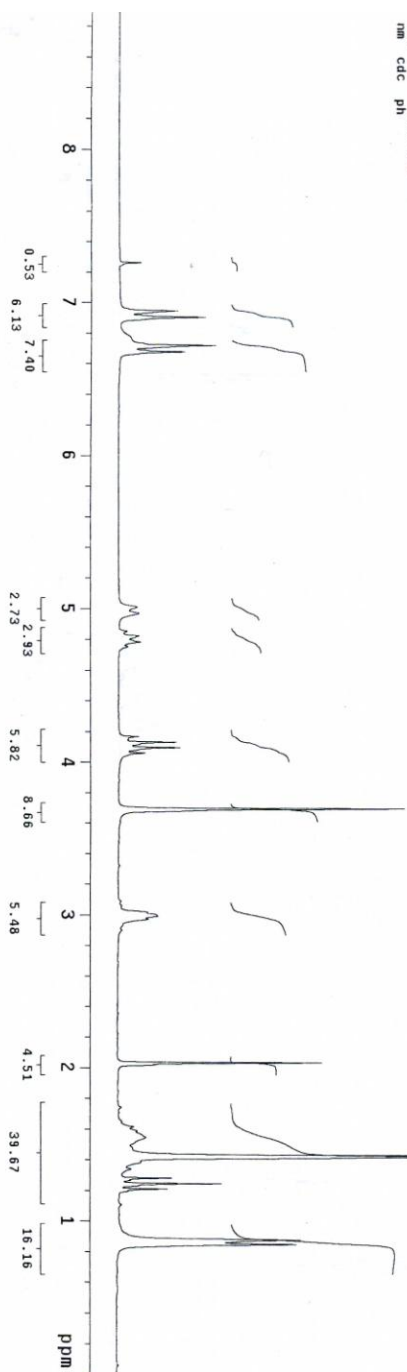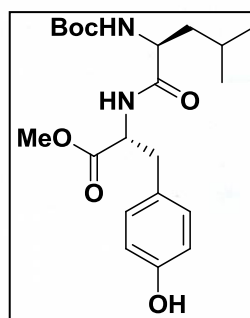

Compound 24 NMR Dipeptide MeO-D-Tyr-Leu-NHBoc



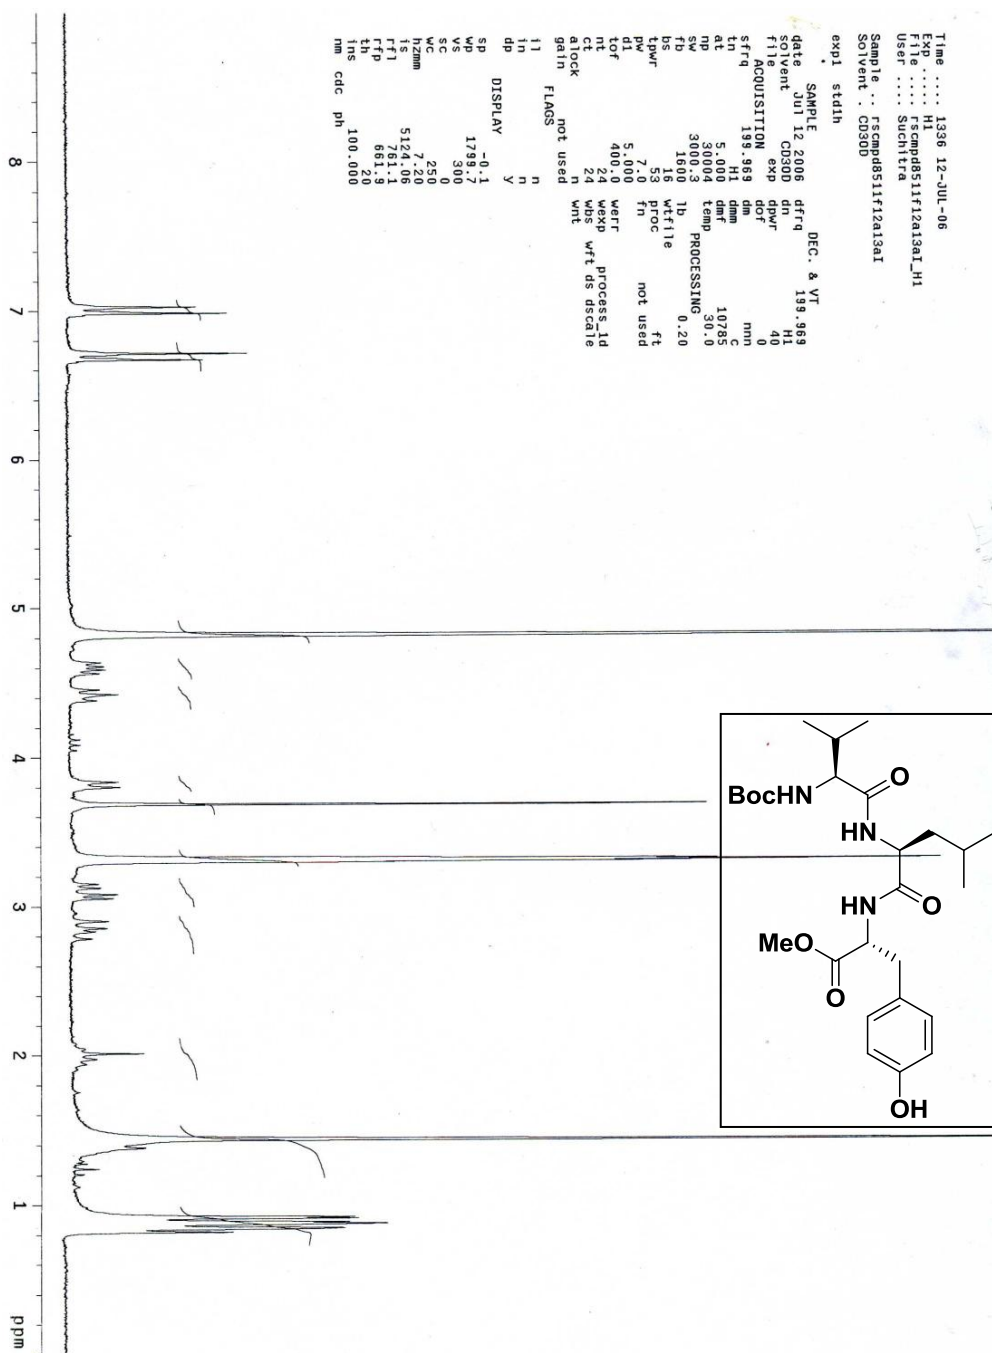

Compound 24 NMR Tripeptide MeO-D-Tyr-Leu-Val-NHBoc

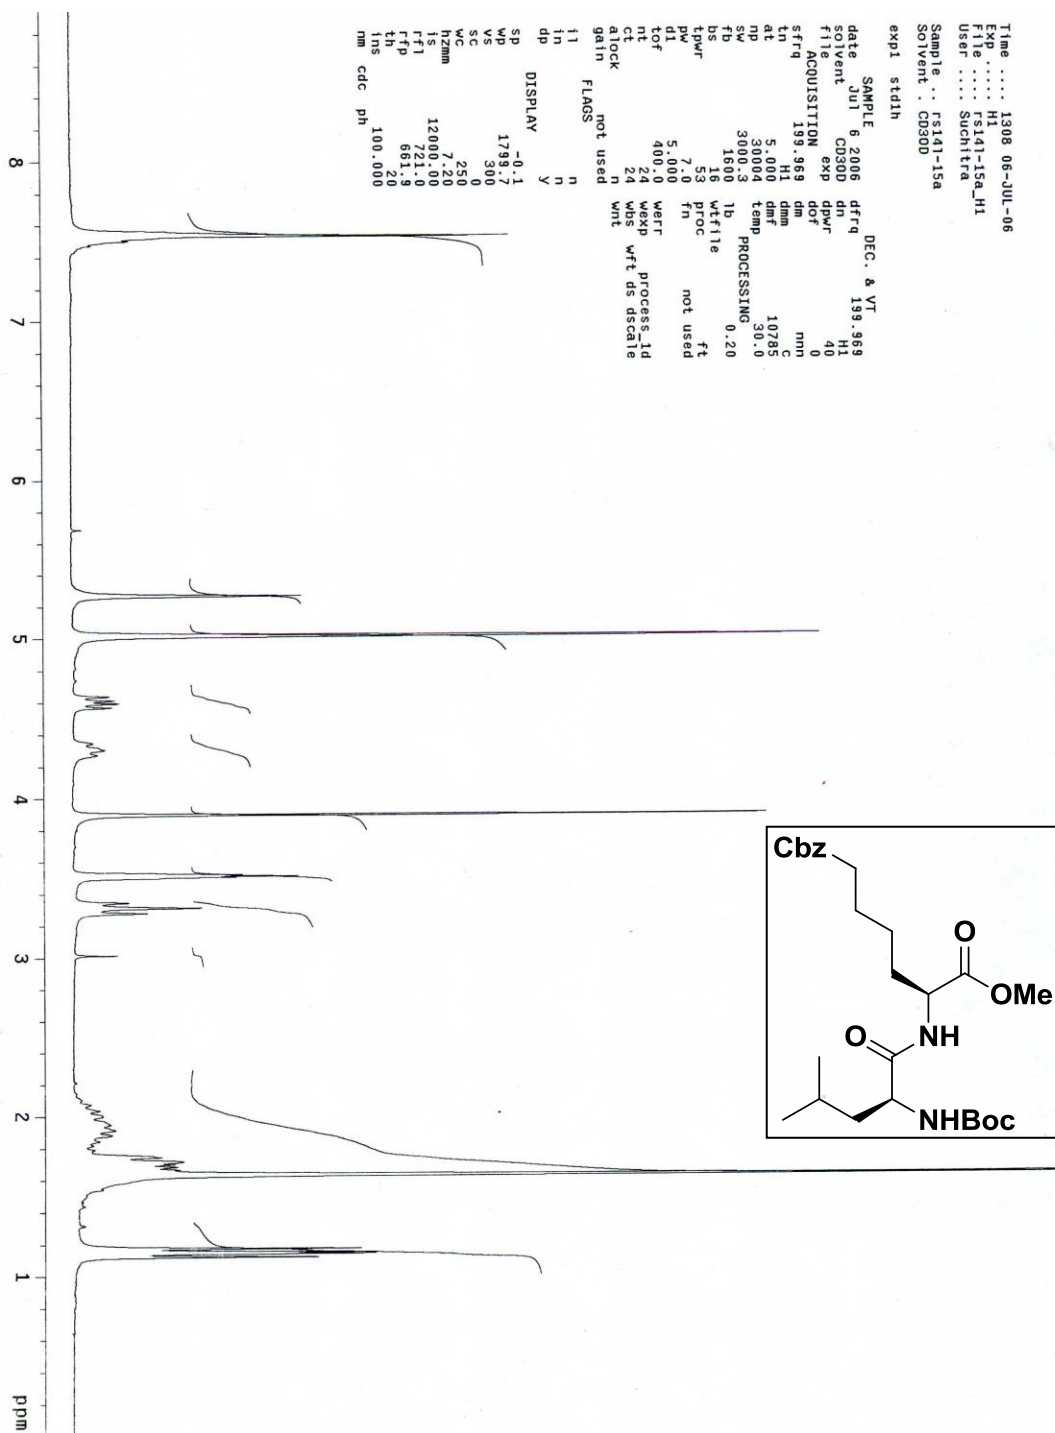

Compound 24 NMR Dipeptide MeO-Lys(Cbz)-Leu-NHBoc

## Supplementary Material

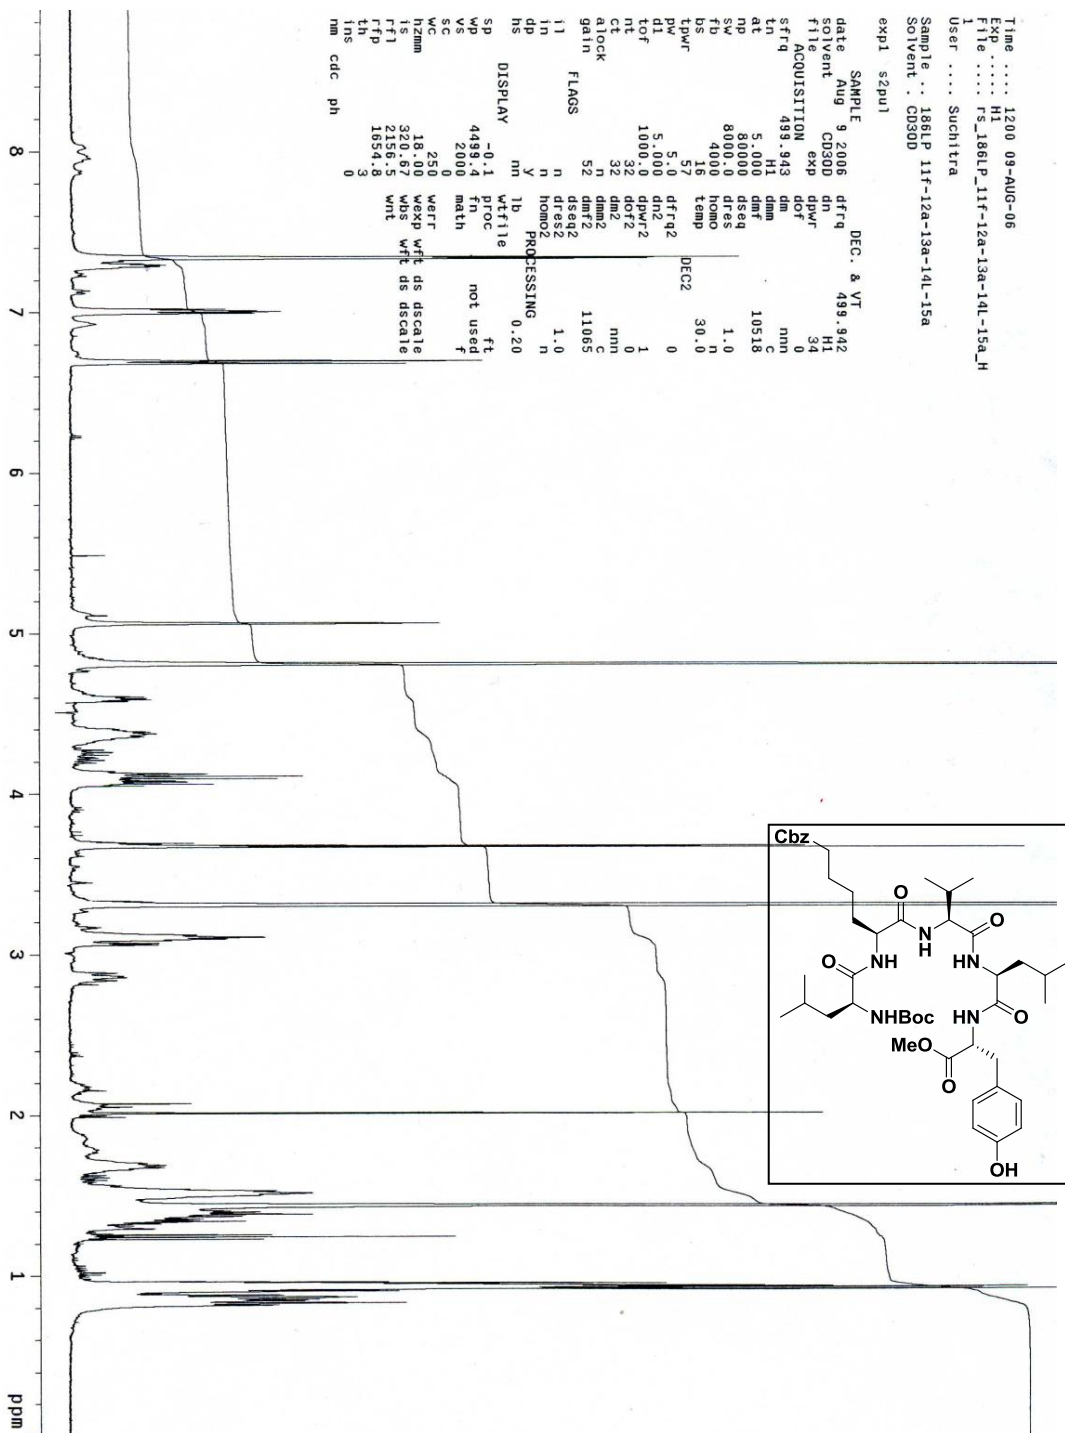

Compound 24 NMR Linear Pentapeptide MeO-D-Tyr-Leu-Val-Lys(Cbz)-Leu-NHBoc

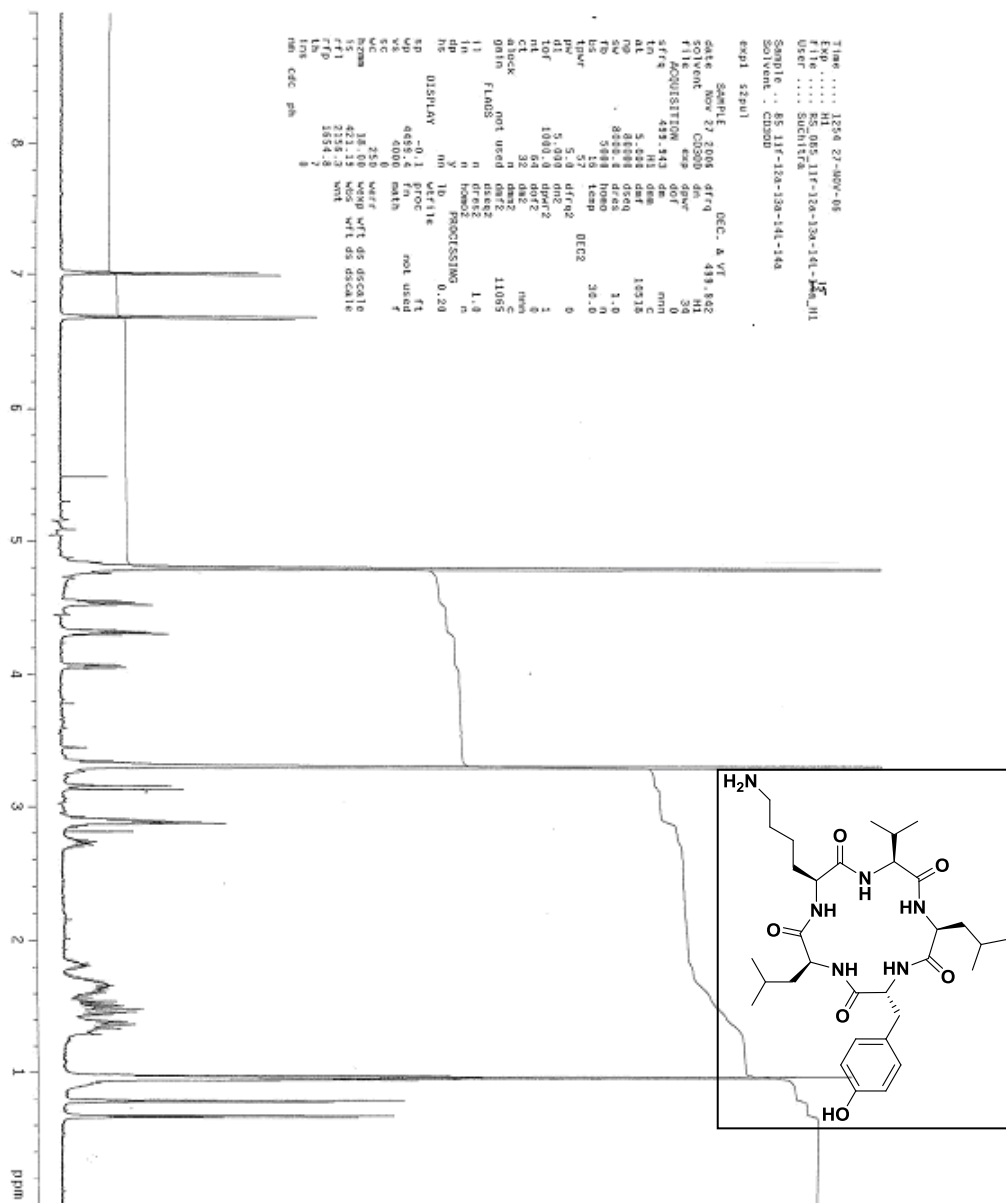

Compound 24 NMR Cyclized Pentapeptide D-Tyr-Leu-Val-Lys-Leu

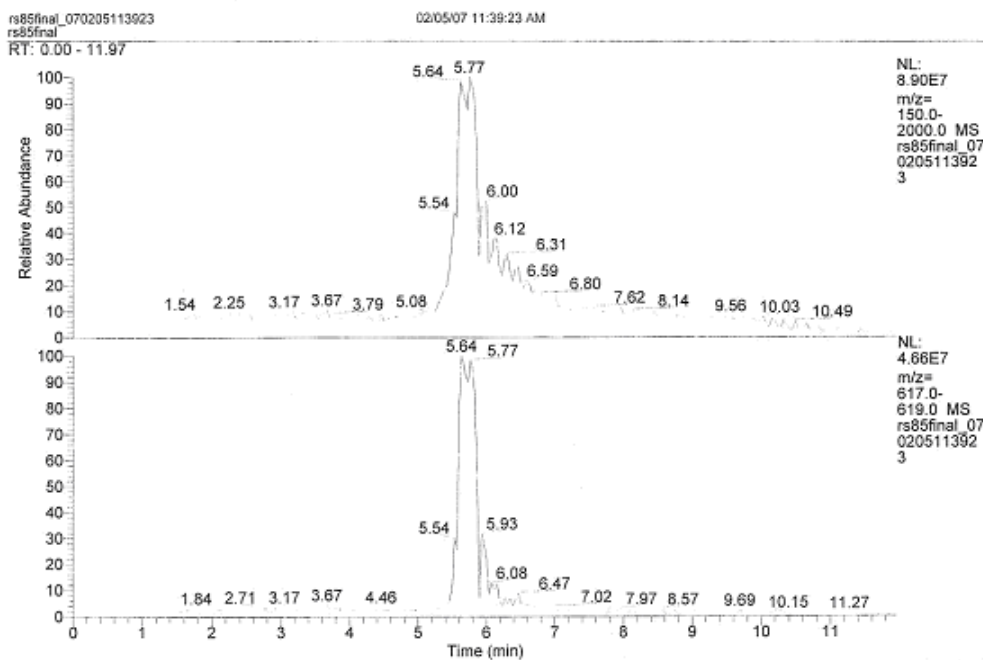

rs85final\_070205113923 #106 RT: 5.80 AV: 1 NL: 3.65E7  
T: + c ESI Full ms [ 150.00-2000.00]

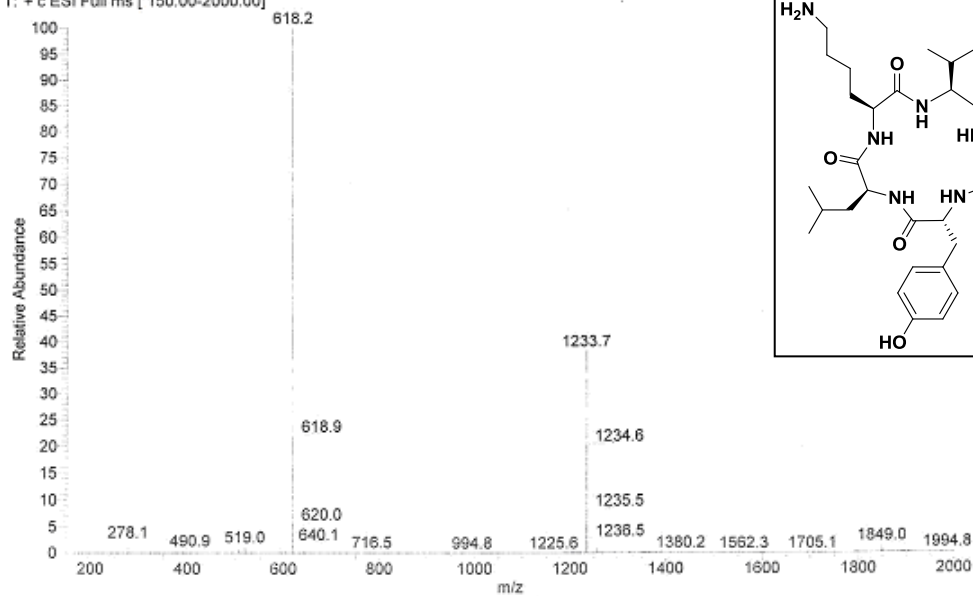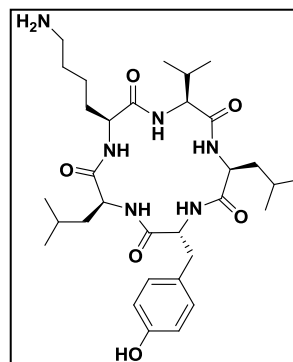

**Compound 24 LCMS Cyclized Pentapeptide D-Tyr-Leu-Val-Lys-Leu (MW=616.8)**

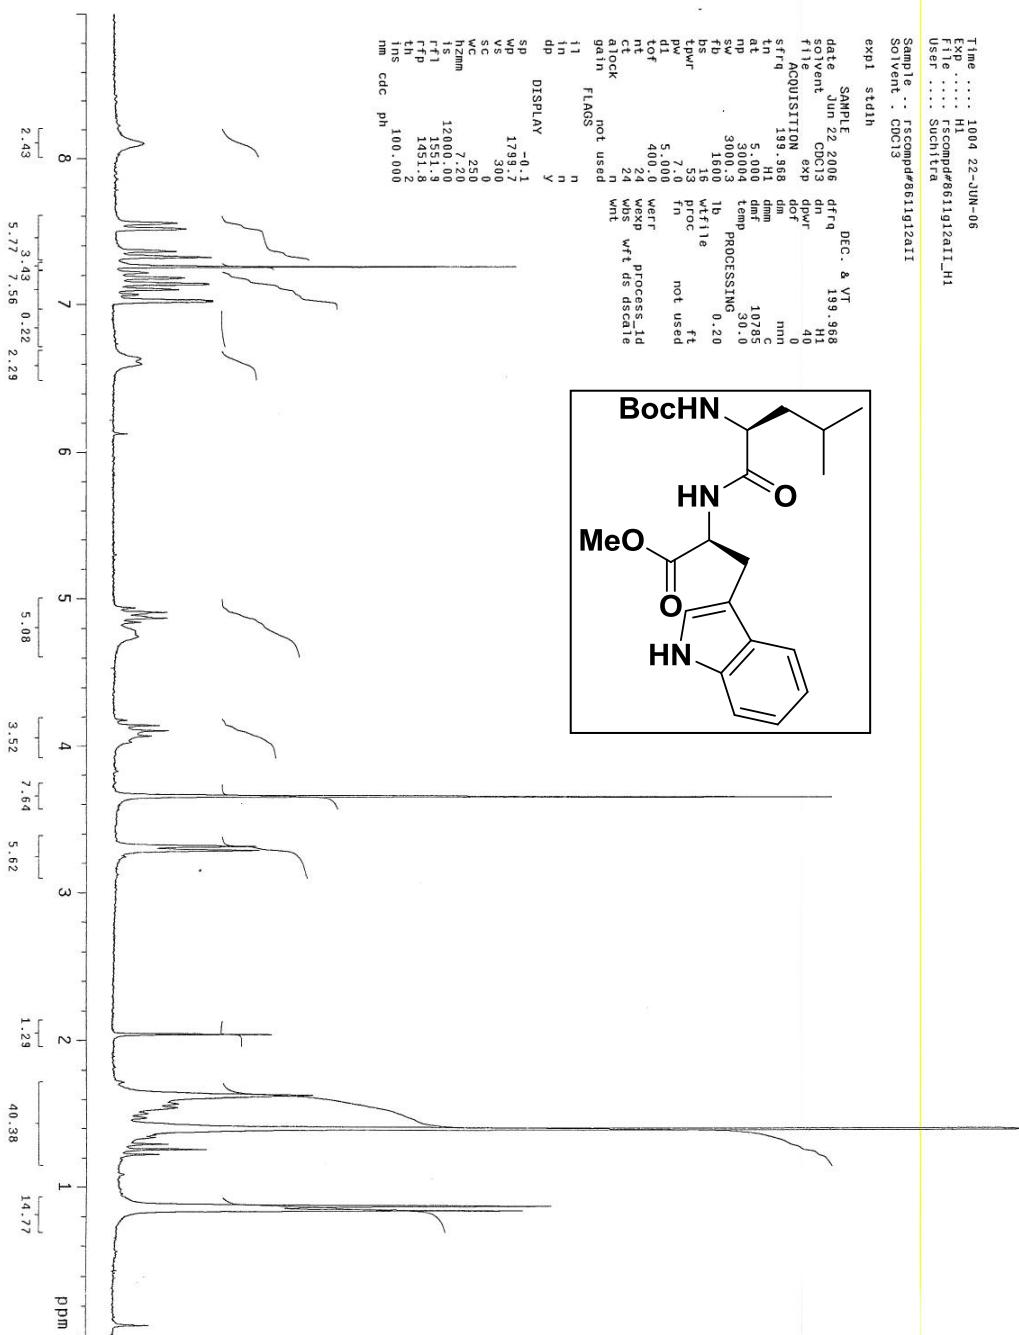

Compound 26 NMR Dipeptide MeO-D-Trp-Leu-NHBoc

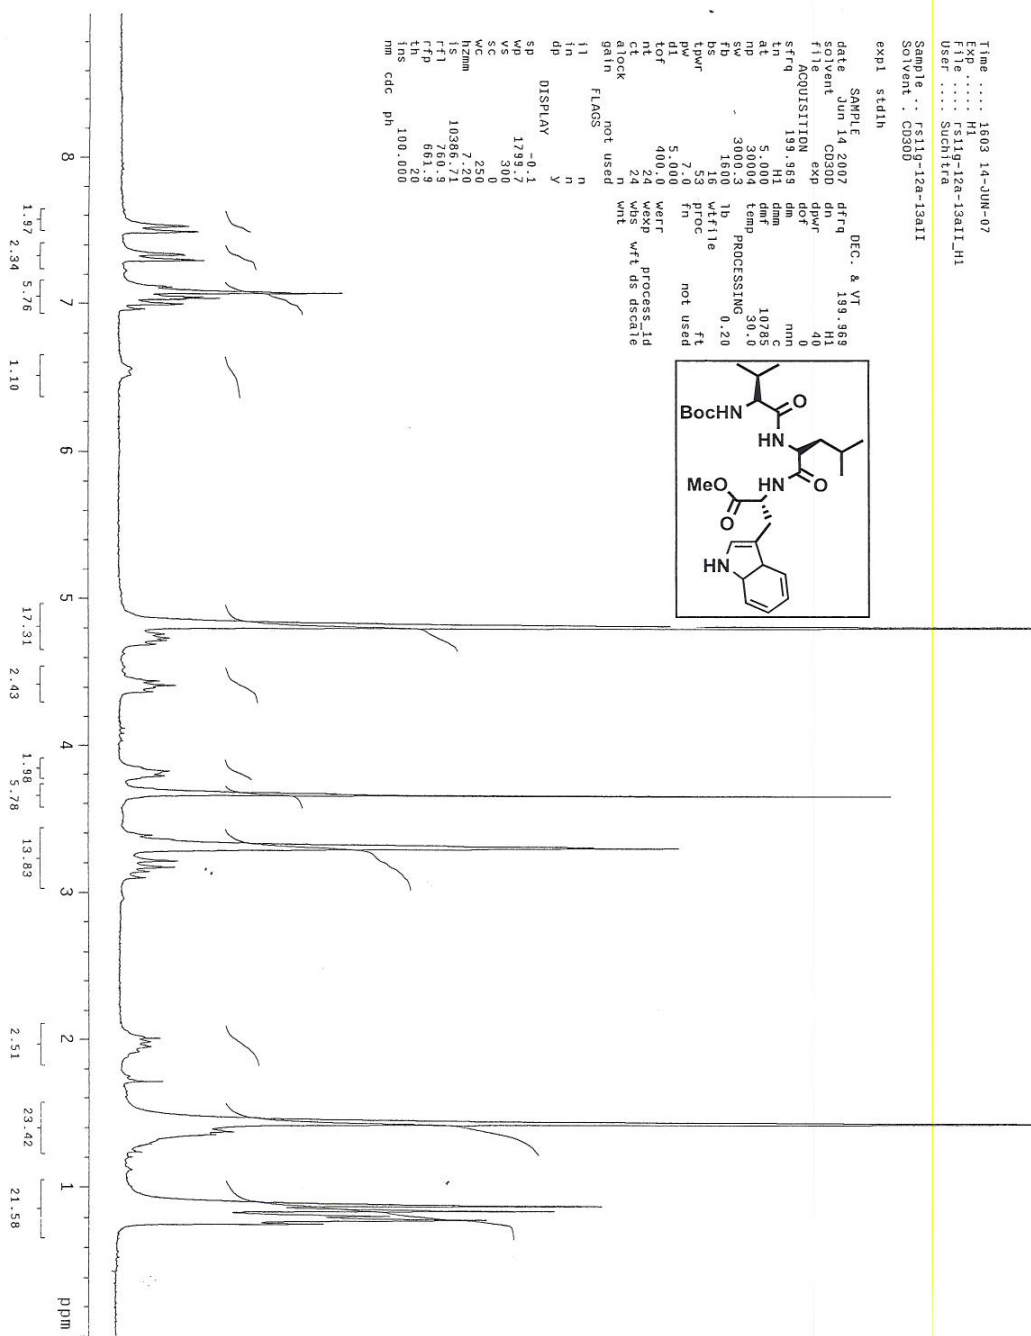

Compound 26 NMR Tripeptide MeO-D-Trp-Leu-Val-NHBoc

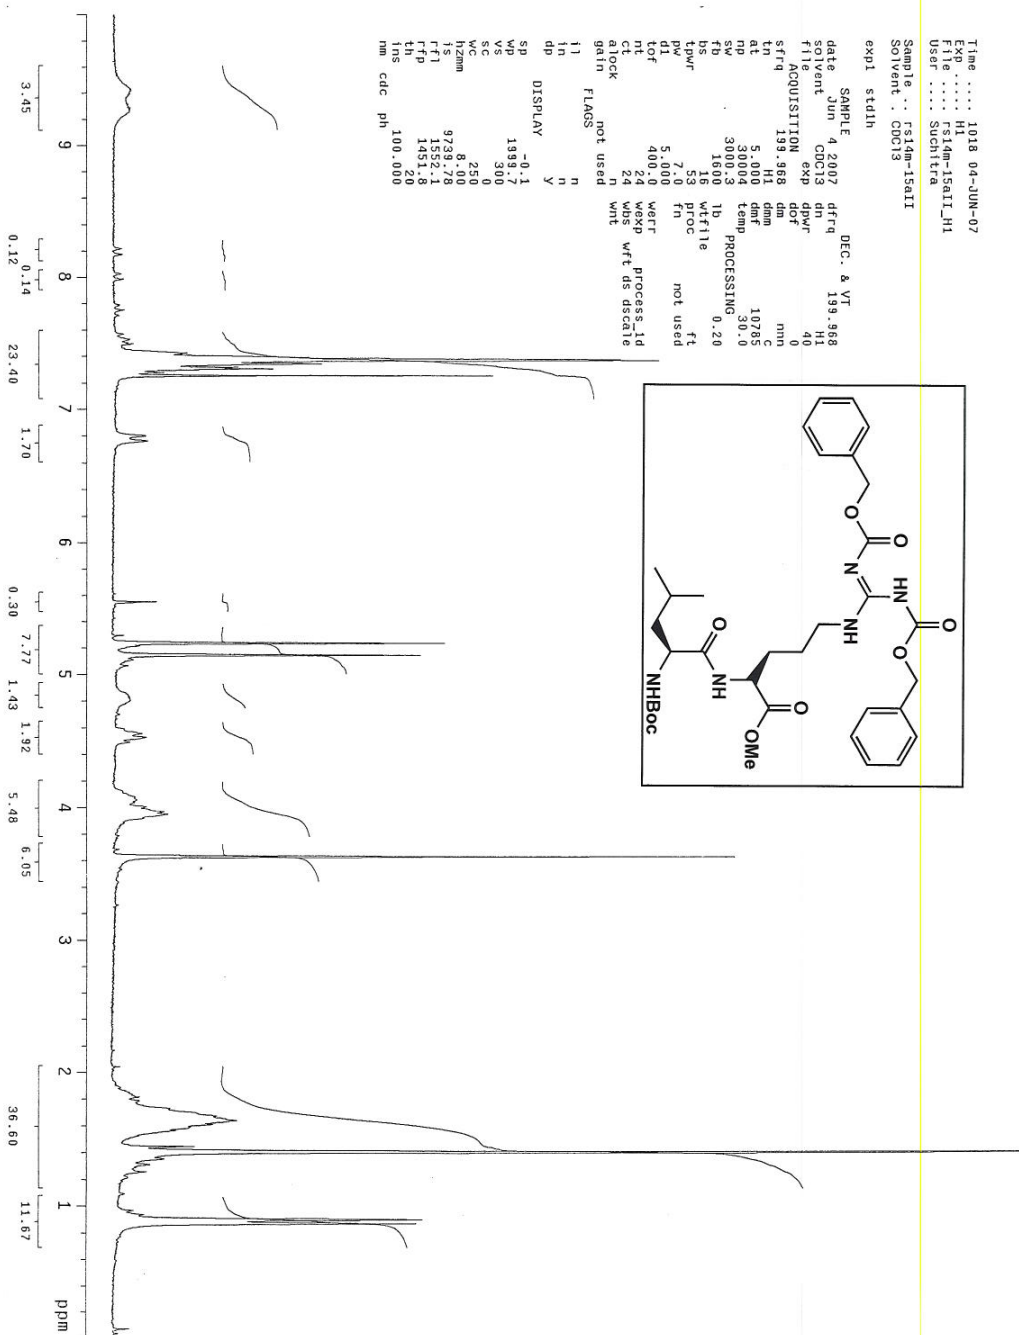

Compound 26 NMR Dipeptide MeO-Arg(2Cbz)-Leu-NHBoc



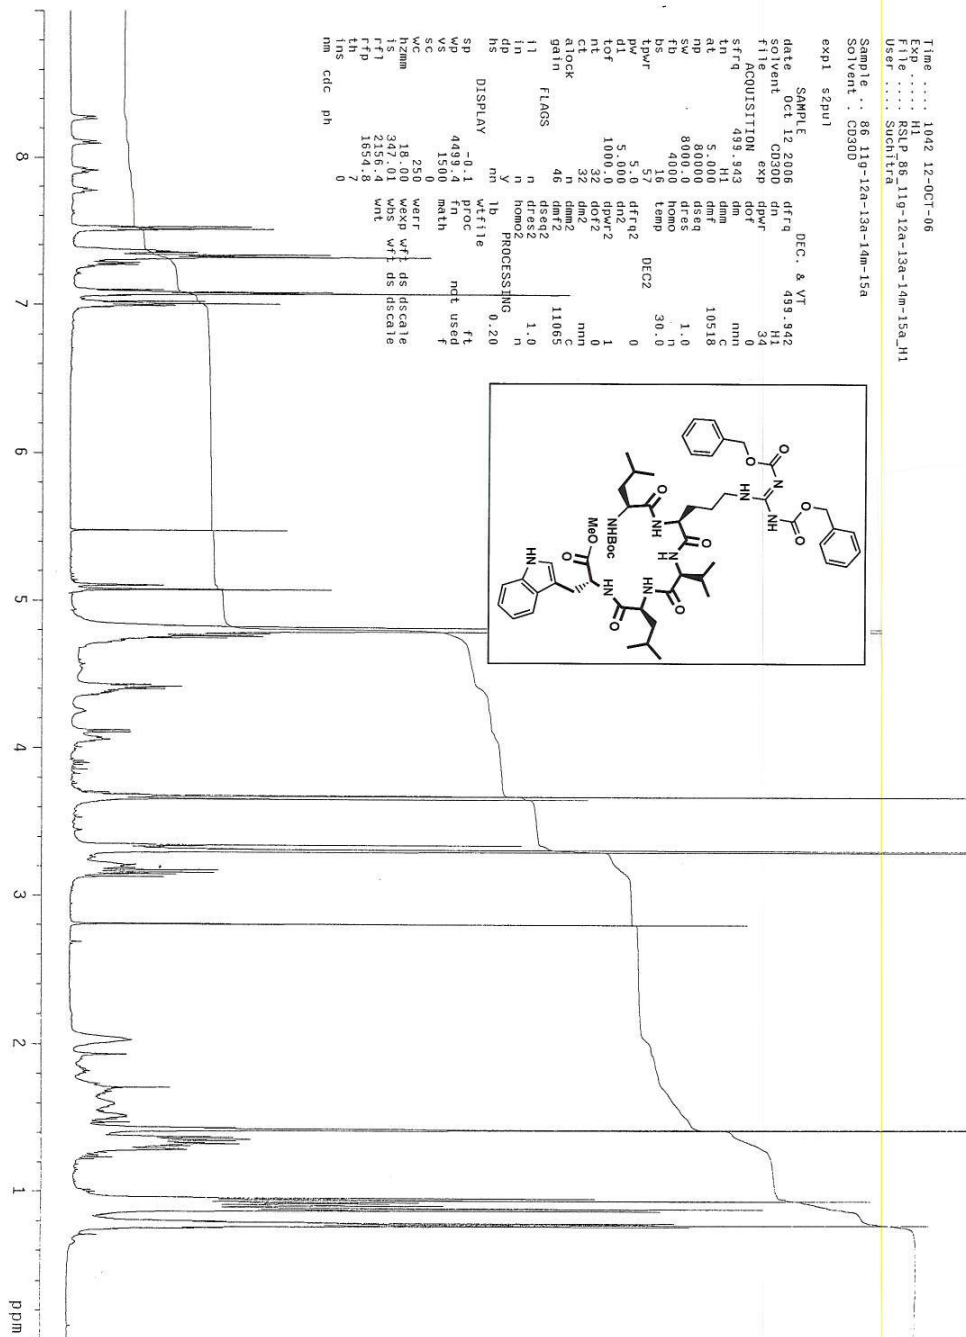

Compound 26 NMR Linear Pentapeptide MeO-D-Trp-Leu-Val-Arg(2Cbz)-Leu-NHBoc

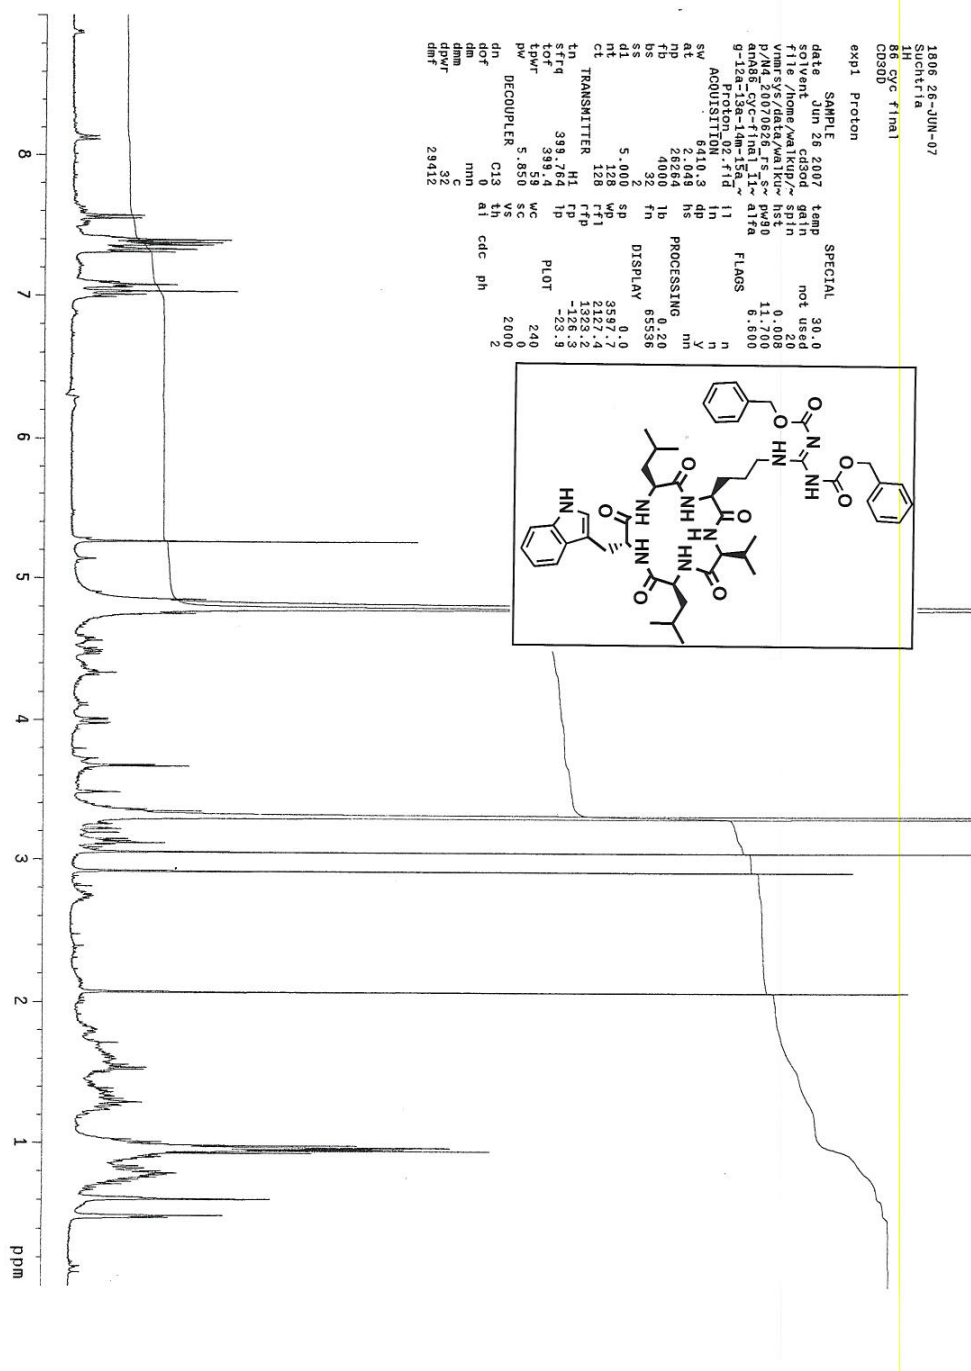

Compound 26 NMR Cyclized Pentapeptide D-Trp-Leu-Val-Arg(2Cbz)-Leu

## FractionLynx Report - srx

Sample: 1  
File:srx326-1  
Description:

Vial:5,1:30  
Date:15-Nov-2007

ID:4330  
Time:09:15:53

Page 1

Printed: Thu Nov 15 09:37:28 2007

## Sample Report:

Sample 1 Vial 5,1:30 ID 4330 File srx326-1 Date 15-Nov-2007 Time 09:15:53 Description

MS ES+ :TIC Smooth (SG, 2x2)

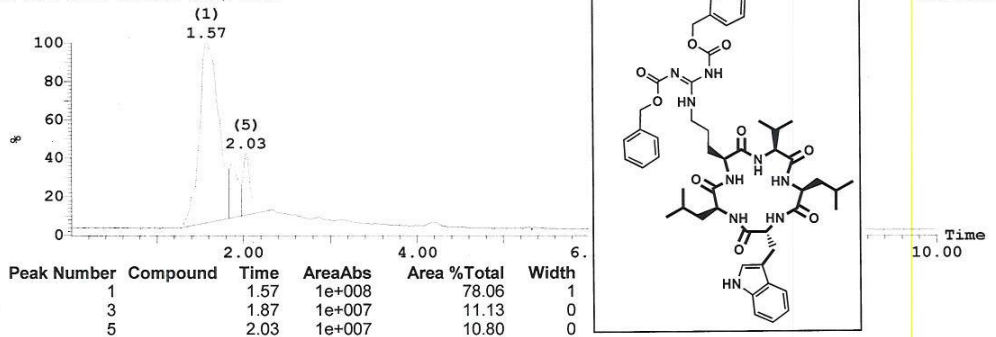

UV Detector: TIC Smooth (SG, 2x2)

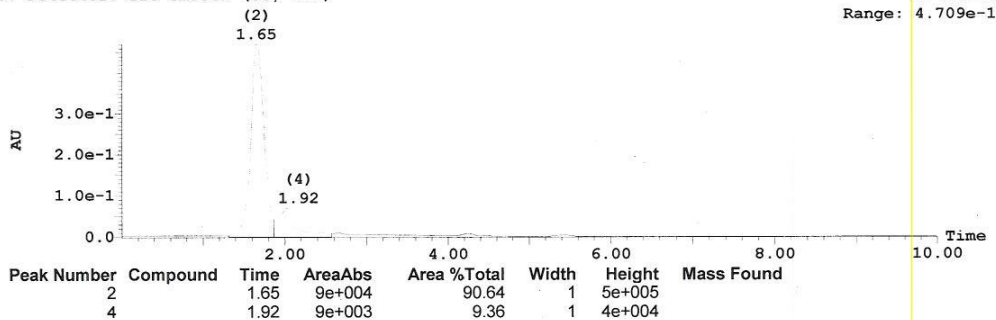

| Peak ID | Compound | Time | Mass Found |
|---------|----------|------|------------|
| 1       |          | 1.57 |            |

SAMPLE: 5,1:30 Combine (151:161-(70:75+231:236))

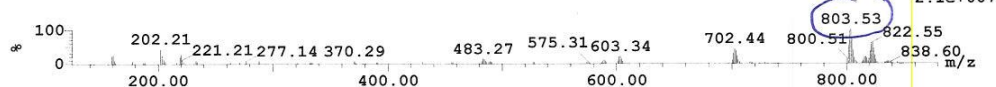

Compound 26 LCMS Cyclized Pentapeptide D-Trp-Leu-Val-Arg(2Cbz)-Leu (MW=802)

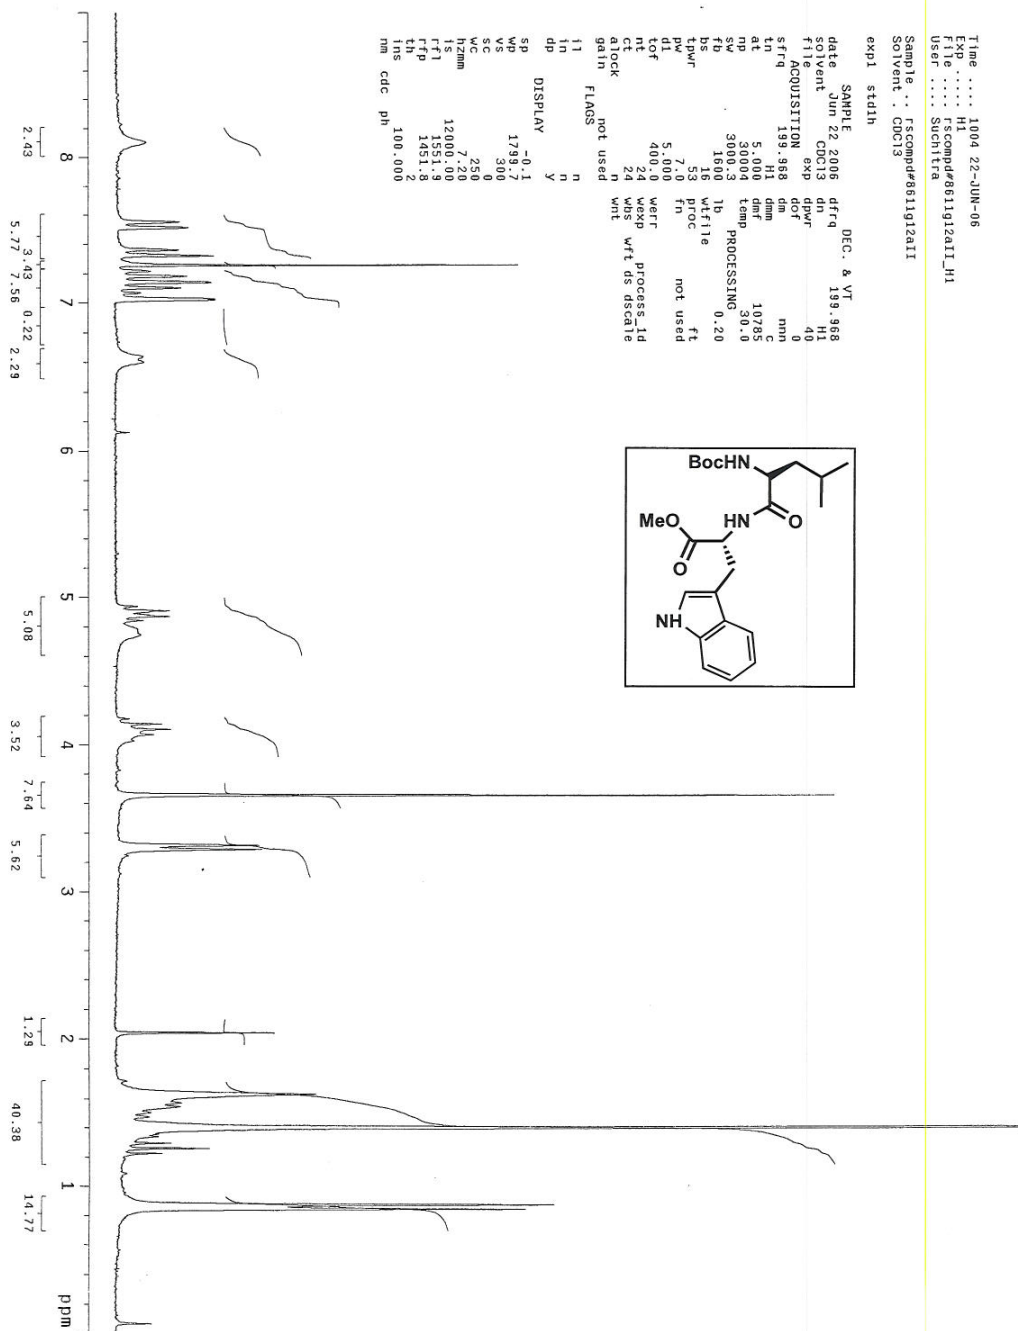

Compound 27 NMR Dipeptide MeO-D-Trp-Leu-NHBoc

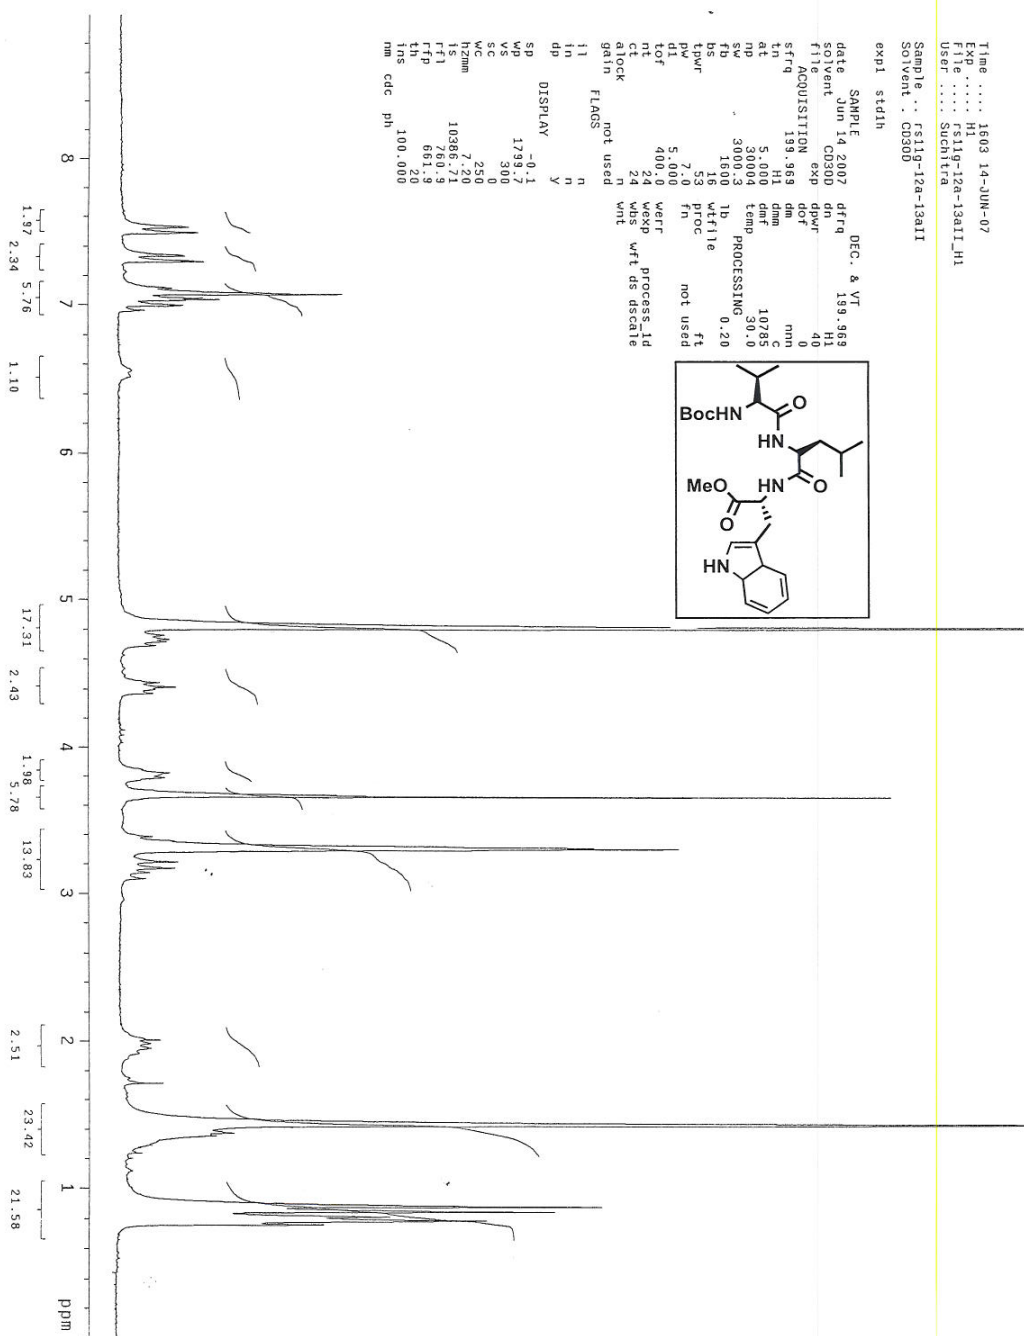

Compound 27 NMR Tripeptide MeO-D-Trp-Leu-Val-NHBoc

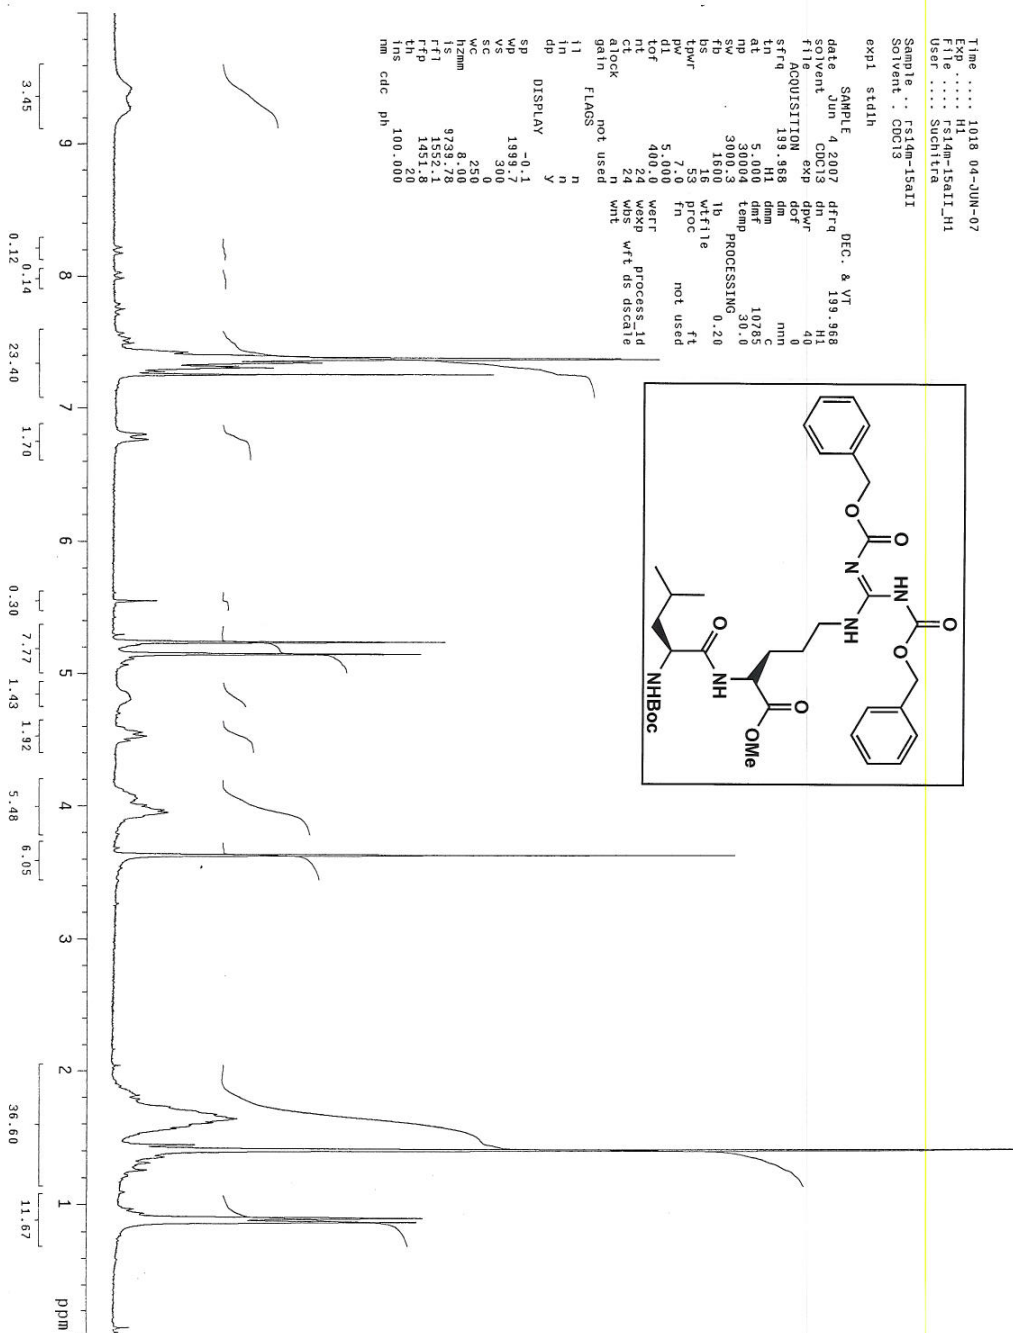

Compound 27 NMR Dipeptide MeO-Arg(2Cbz)-Leu-NHBoc

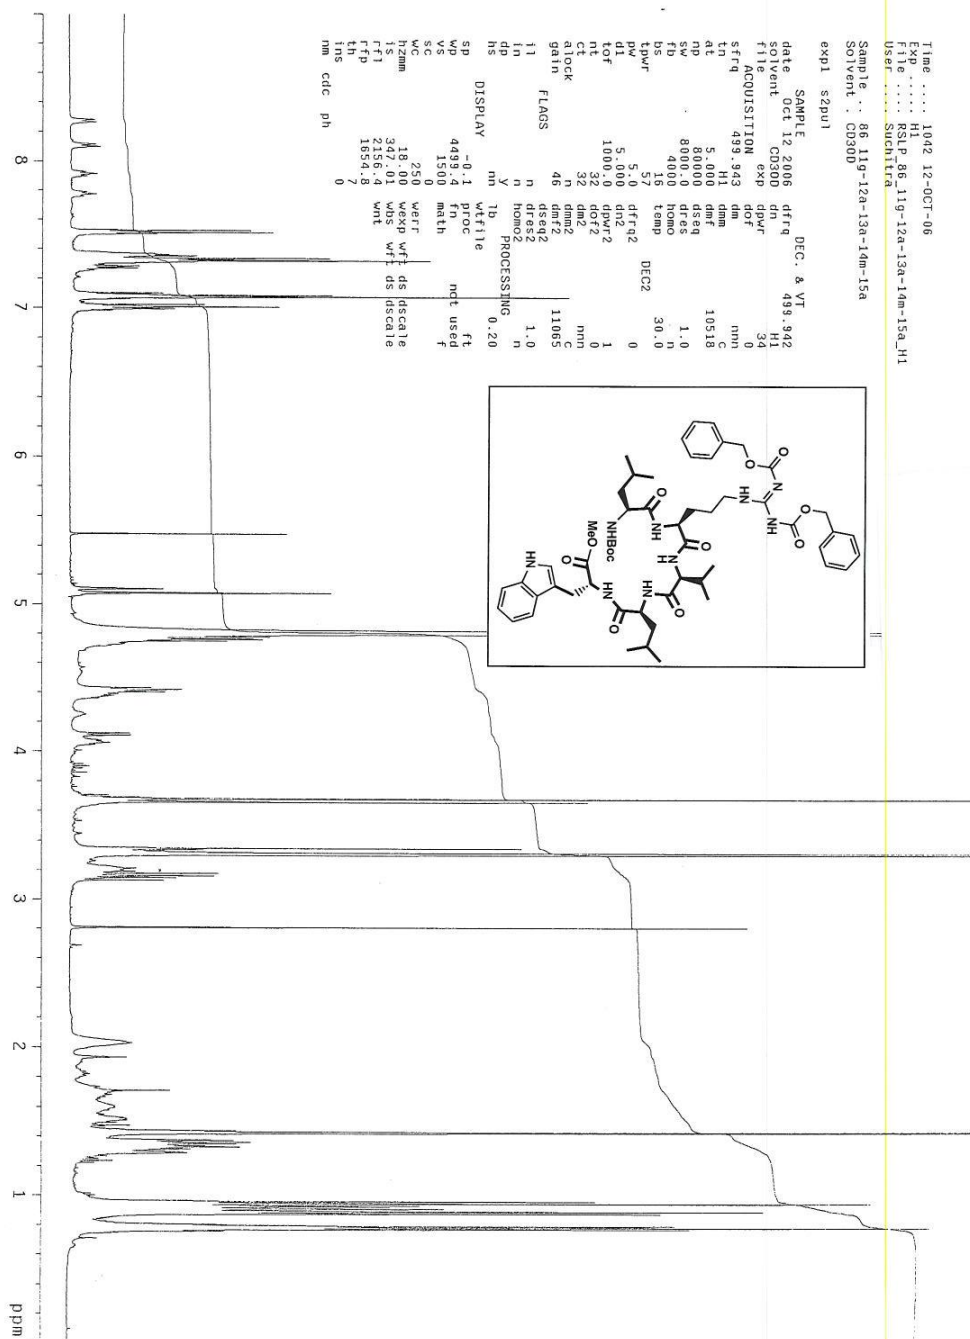

Compound 27 NMR Linear Pentapeptide MeO-D-Trp-Leu-Val-Arg(2Cbz)-Leu-NHBoc

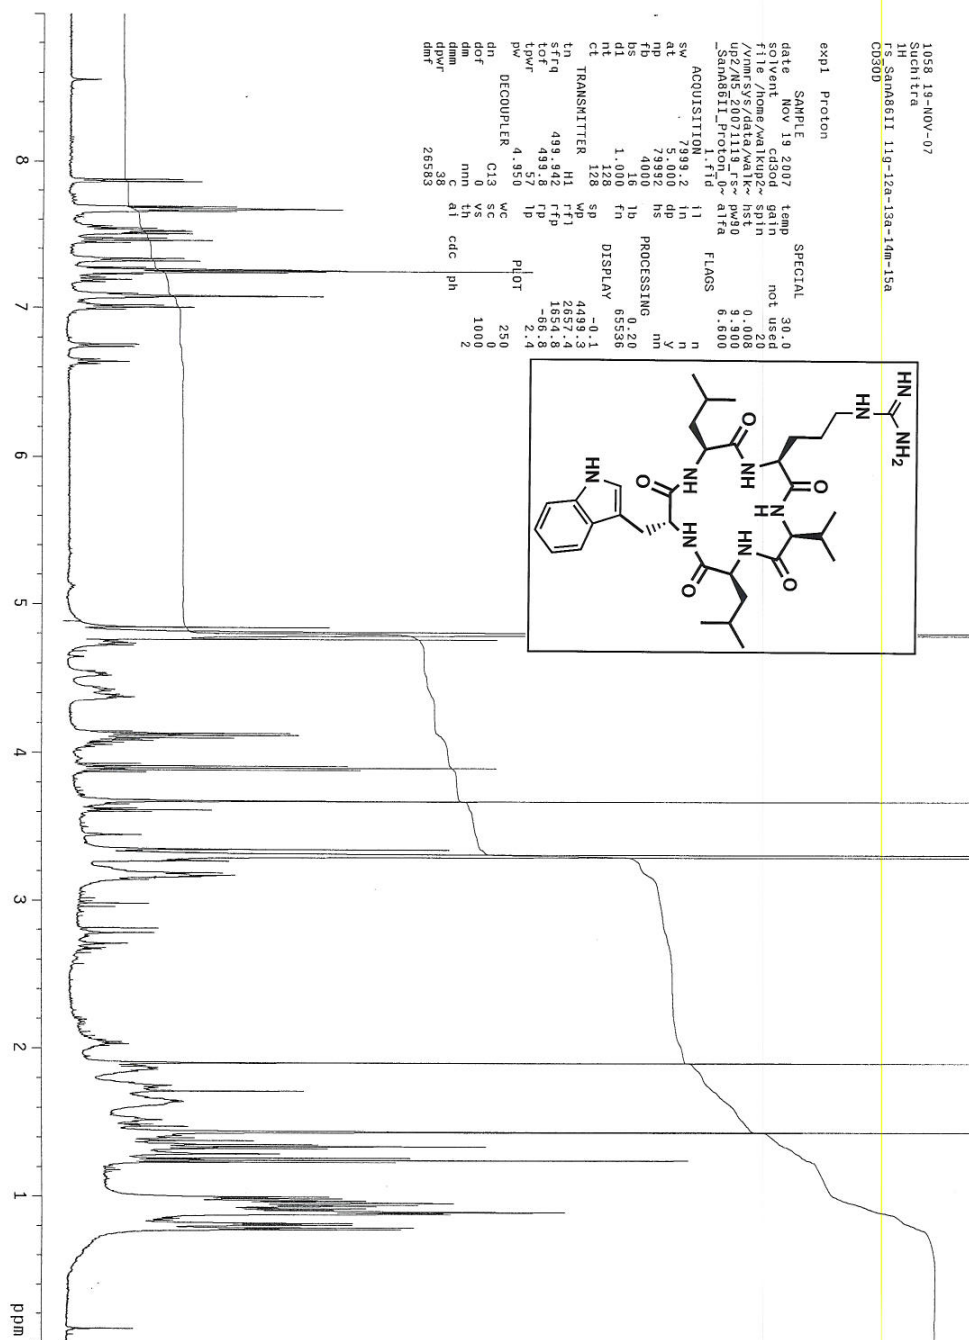

Compound 27 NMR Cyclized Pentapeptide D-Trp-Leu-Val-Arg-Leu



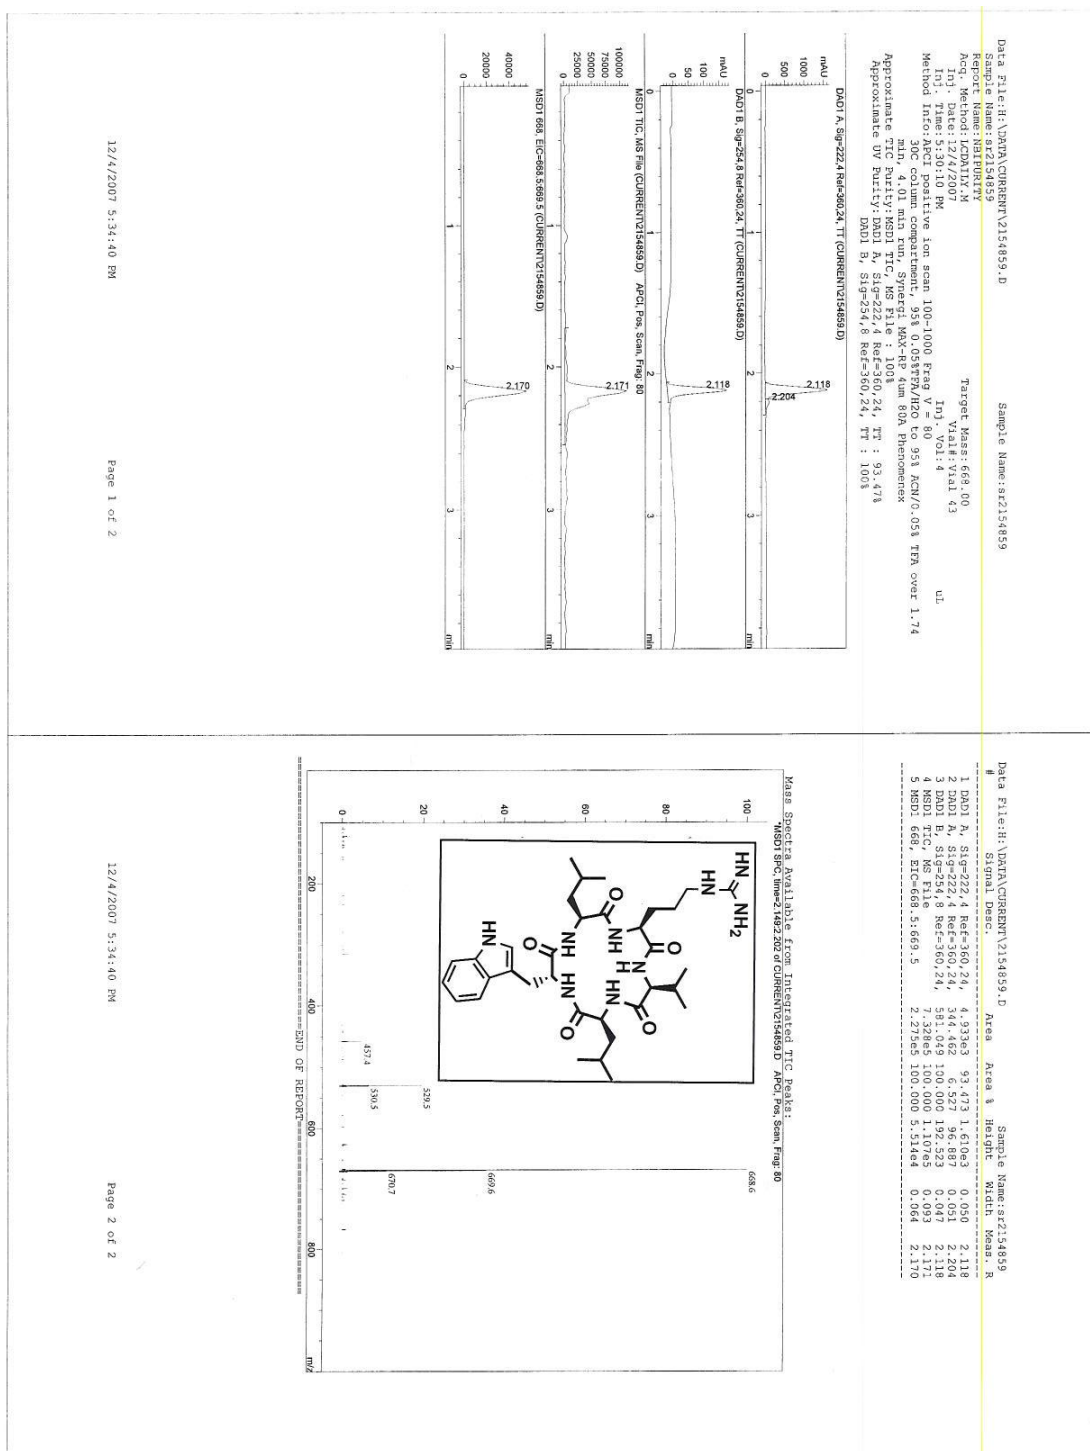

Compound 27 LCMS Cyclized Pentapeptide D-Trp-Leu-Val-Arg-Leu (MW=668)

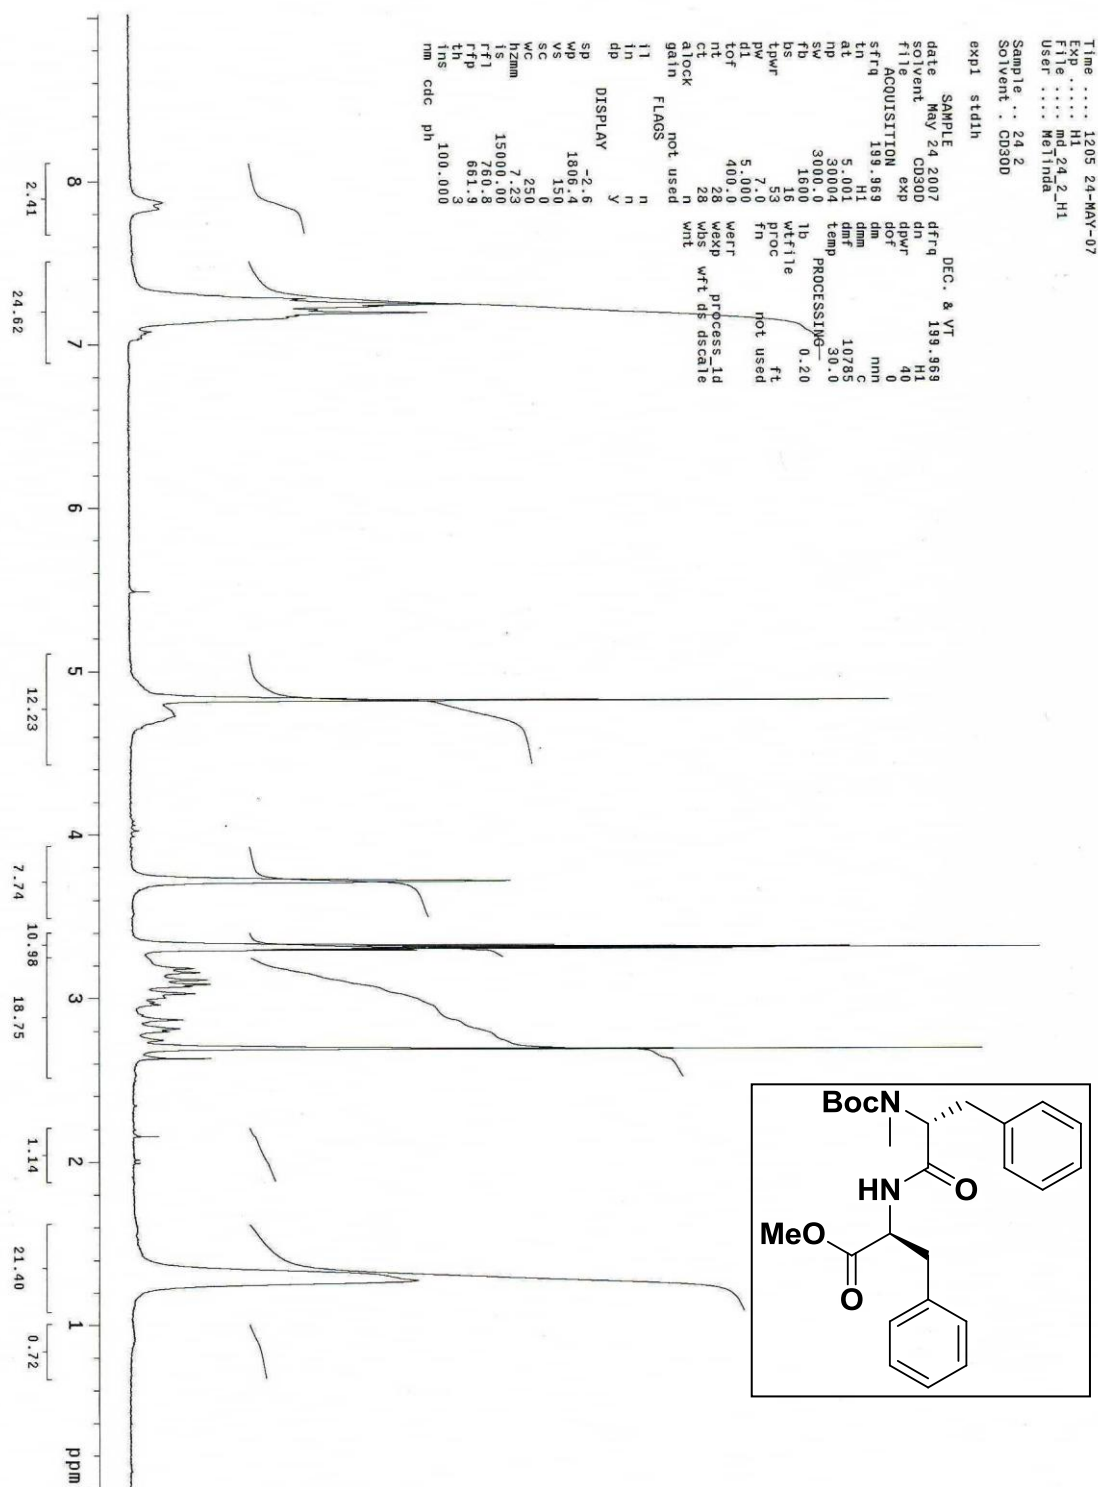

Compound 28 NMR Dipeptide MeO-Phe-N-Me-D-Phe-NBoc

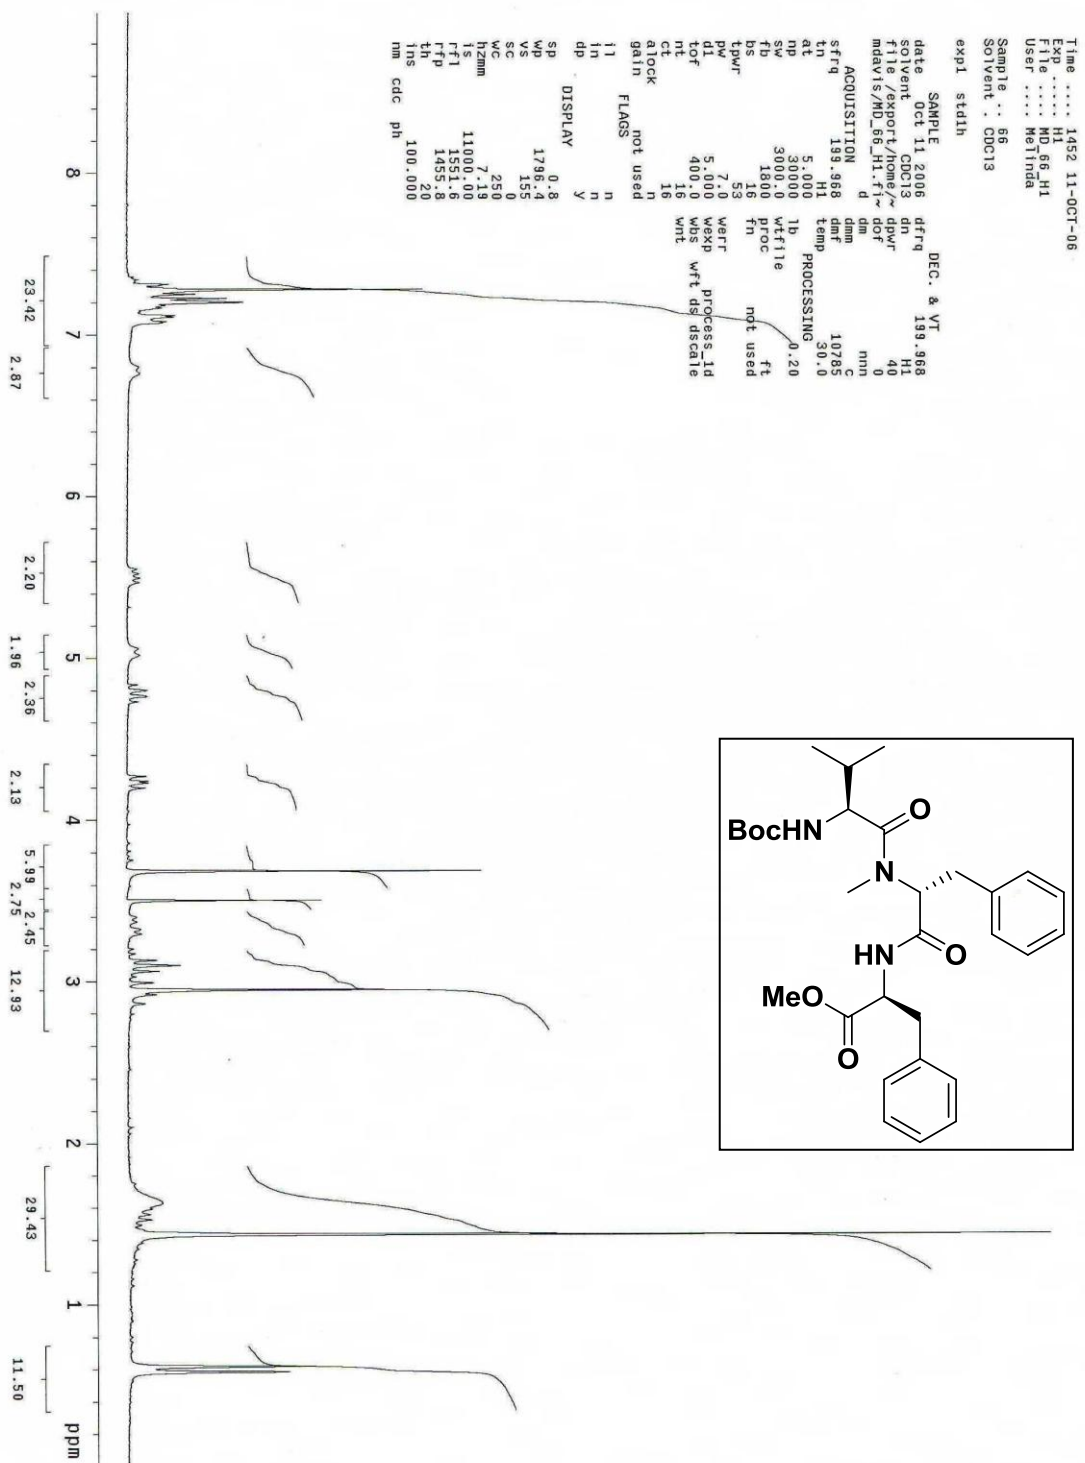

Compound 28 NMR Tripeptide MeO-Phe-N-Me-D-Phe-Val-NHBoc

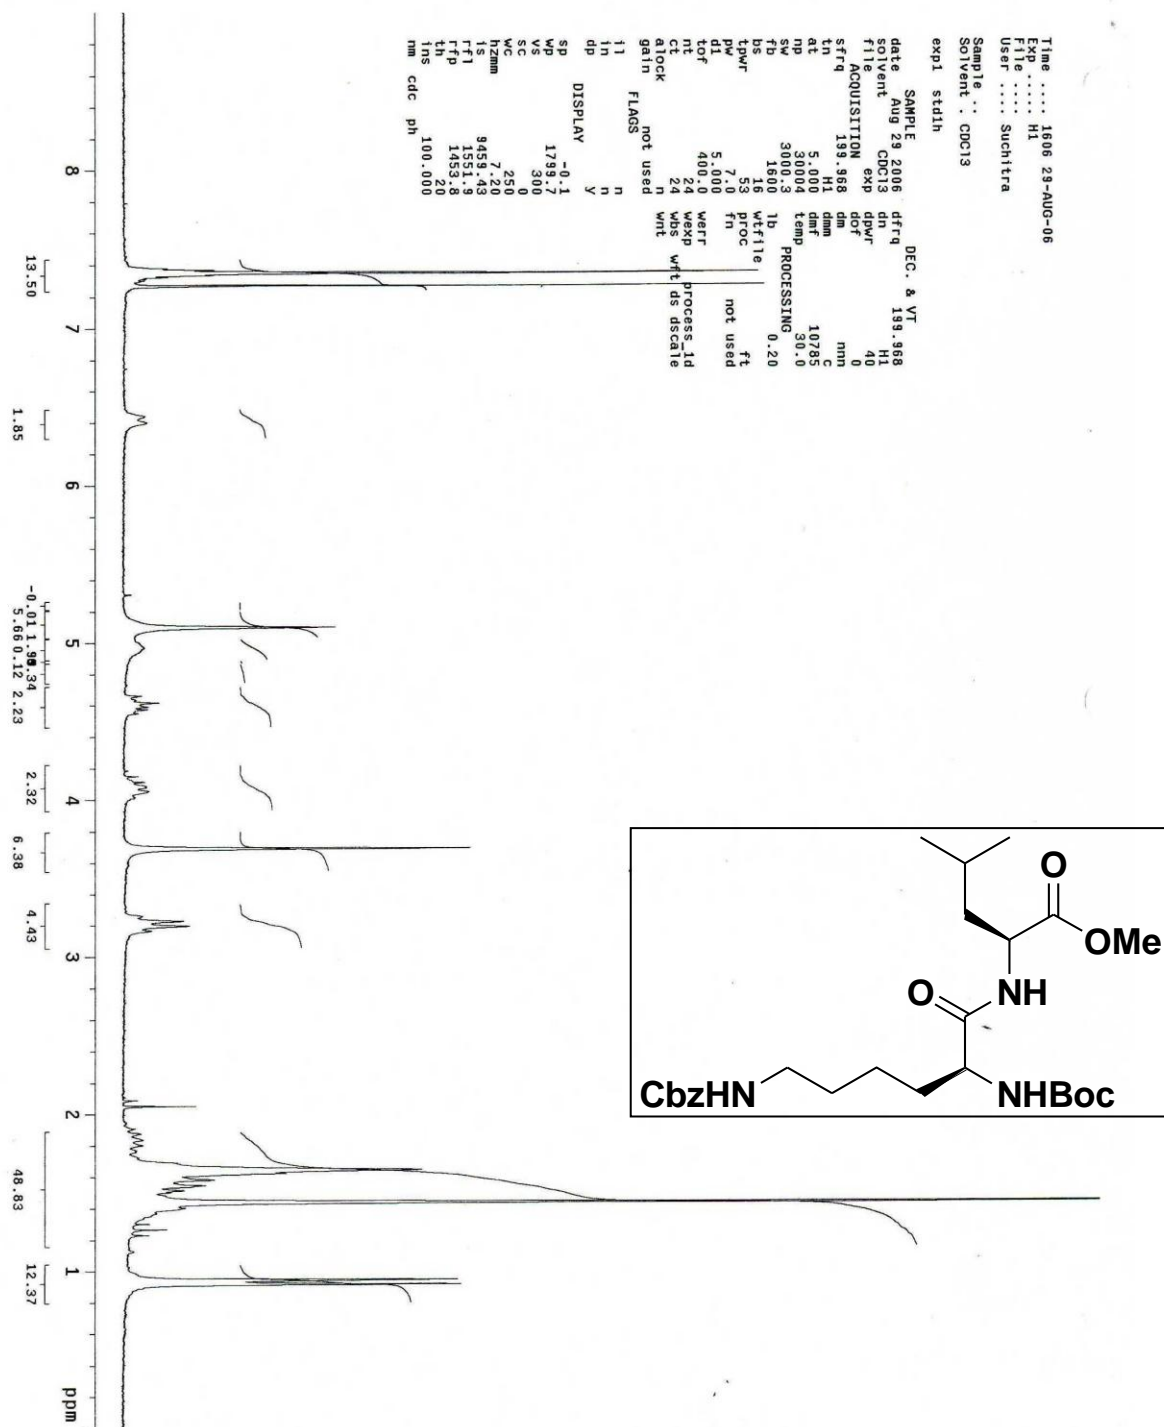

Compound 28 NMR Dipeptide MeO-Leu-Lys(Cbz)-NH-Boc

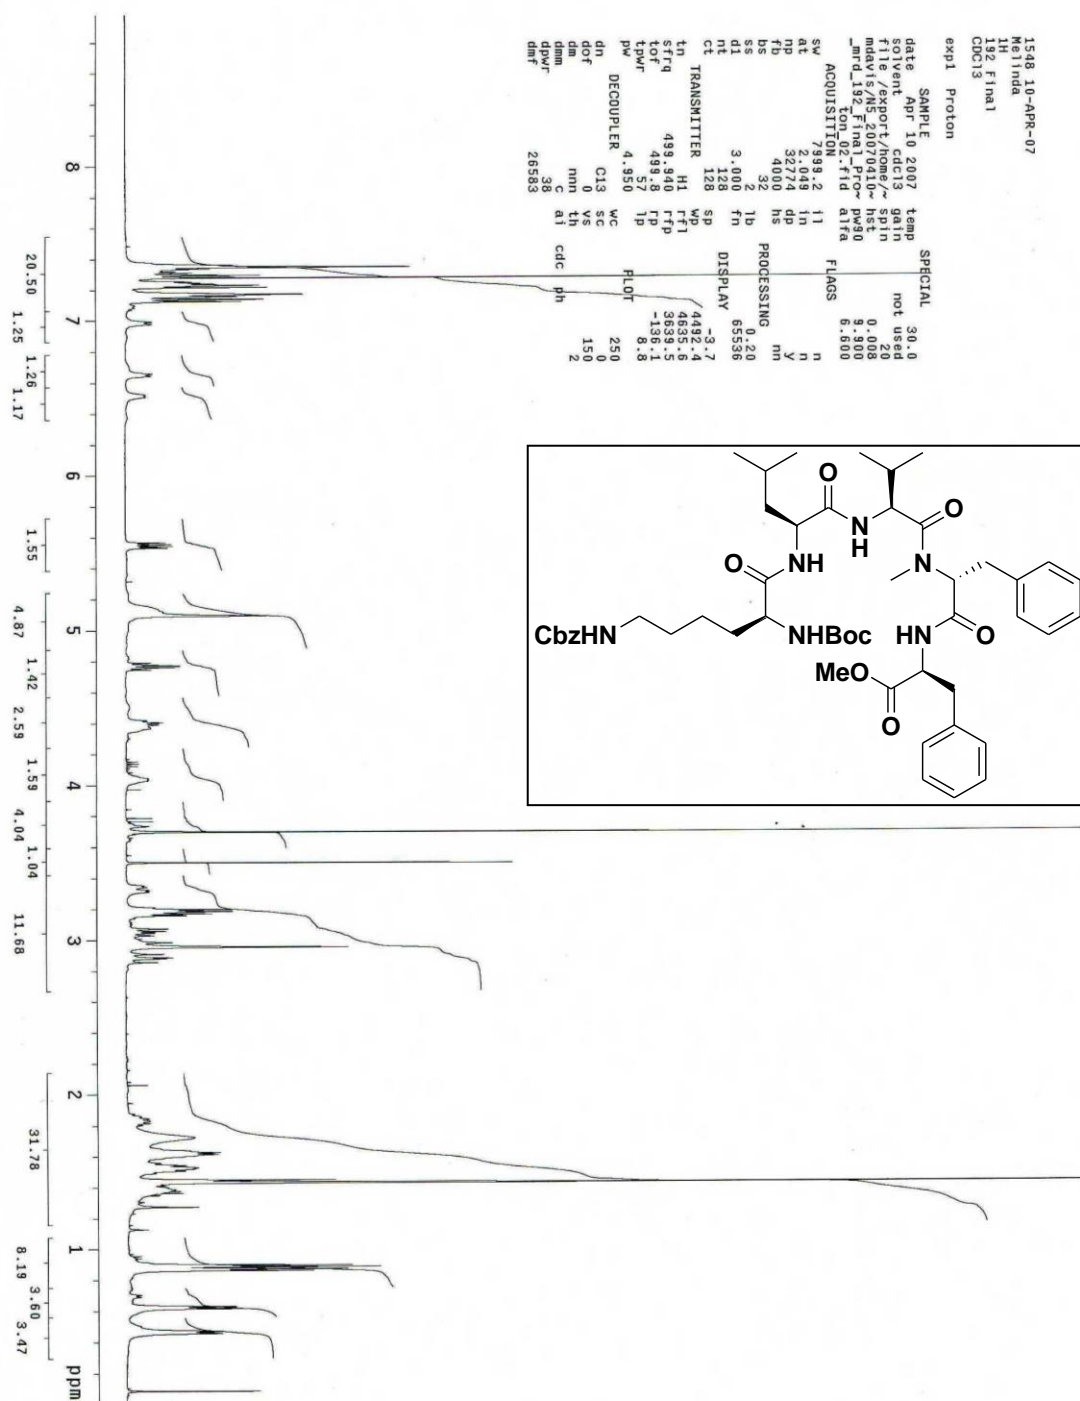

Compound 28 NMR Linear Pentapeptide MeO-Phe-N-Me-D-Phe-Val-Leu-Lys(Cbz)-NHBOC

## Display Report - All Windows Selected Analysis

**Analysis Name:** MD000014.D    **Instrument:** Agilent 6330 Ion Trap    **Print Date:** 5/16/2008 5:28:06 PM  
**Method:** SANA.M    **Operator:** sdsu    **Acq. Date:** 2/28/2008 2:18:45 PM  
**Sample Name:** md\_122LP  
**Analysis Info:**

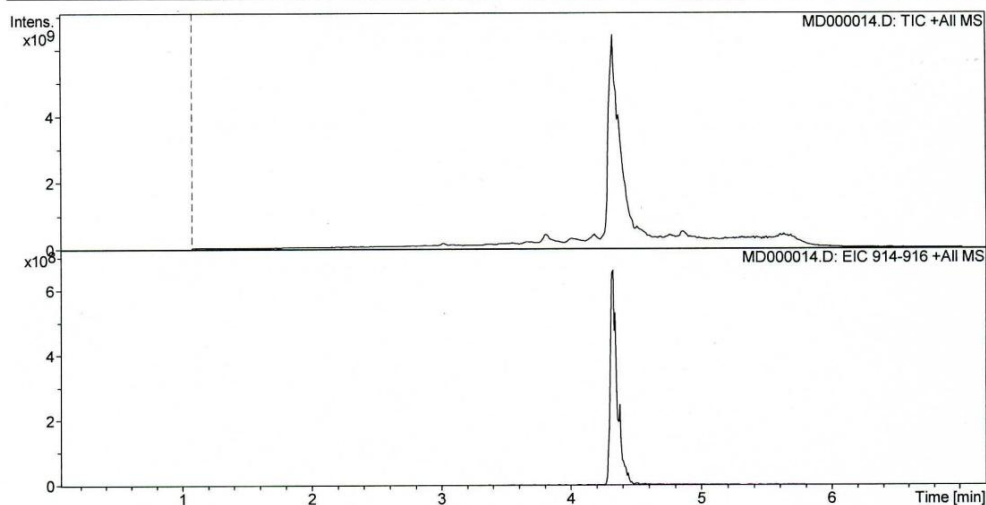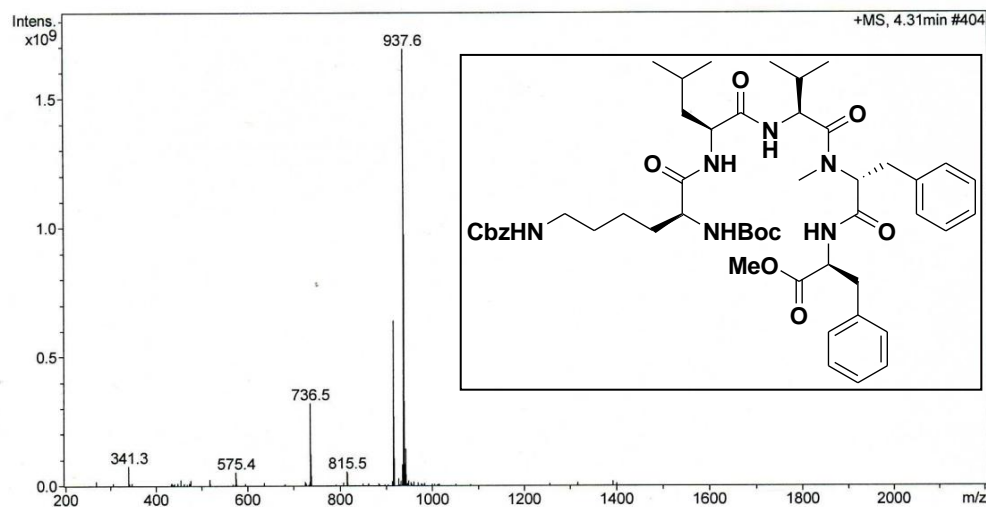

**Compound 28 LCMS Linear Pentapeptide MeO-Phe-N-Me-D-Phe-Val-Leu-Lys(Cbz)-NH-Boc (MW=915.1)**

## Display Report - All Windows Selected Analysis

**Analysis Name:** MD\_24\_11A12N **Instrument:** Agilent 6330 Ion Trap **Print Date:** 5/16/2008 5:38:07 PM  
**Method:** SANA.M 13A14C15N.D **Operator:** sdsu **Acq. Date:** 3/10/2008 1:37:49 PM  
**Sample Name:** MD\_24\_11a12n13a14c15n  
**Analysis Info:**

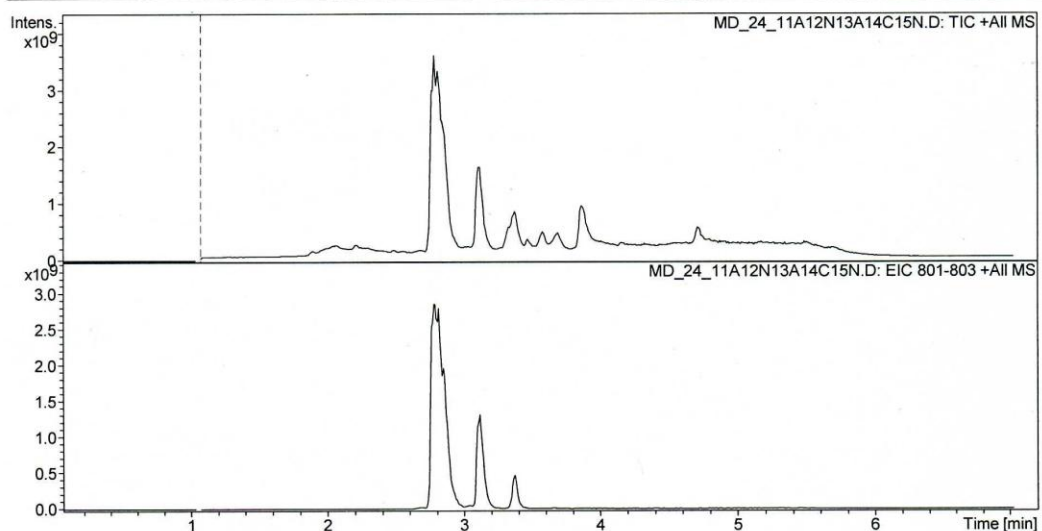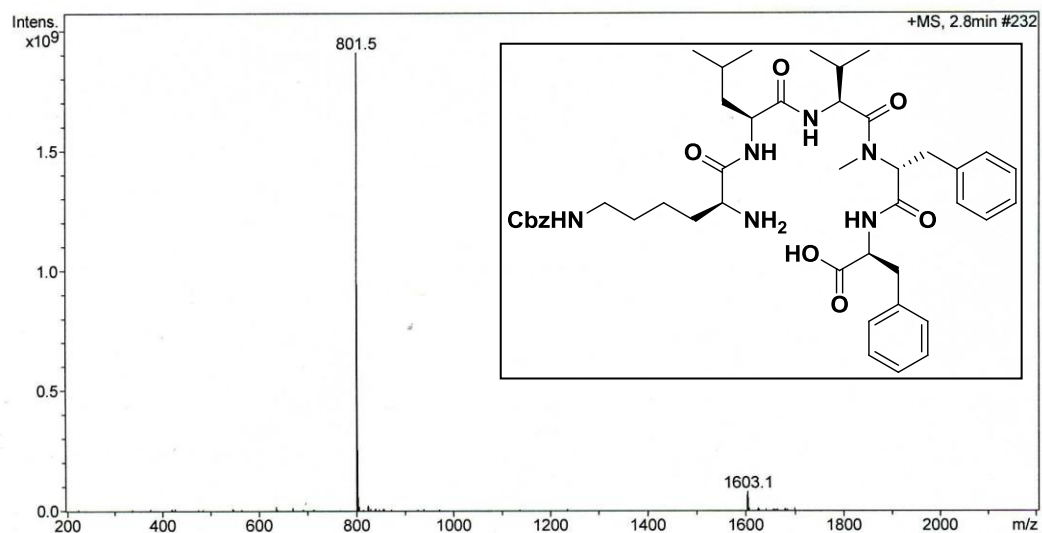

**Compound 28 LCMS Double Deprotected Linear Pentapeptide HO-Phe-N-Me-D-Phe-Val-Leu-Lys(Cbz)-NH<sub>2</sub> (MW=801)**



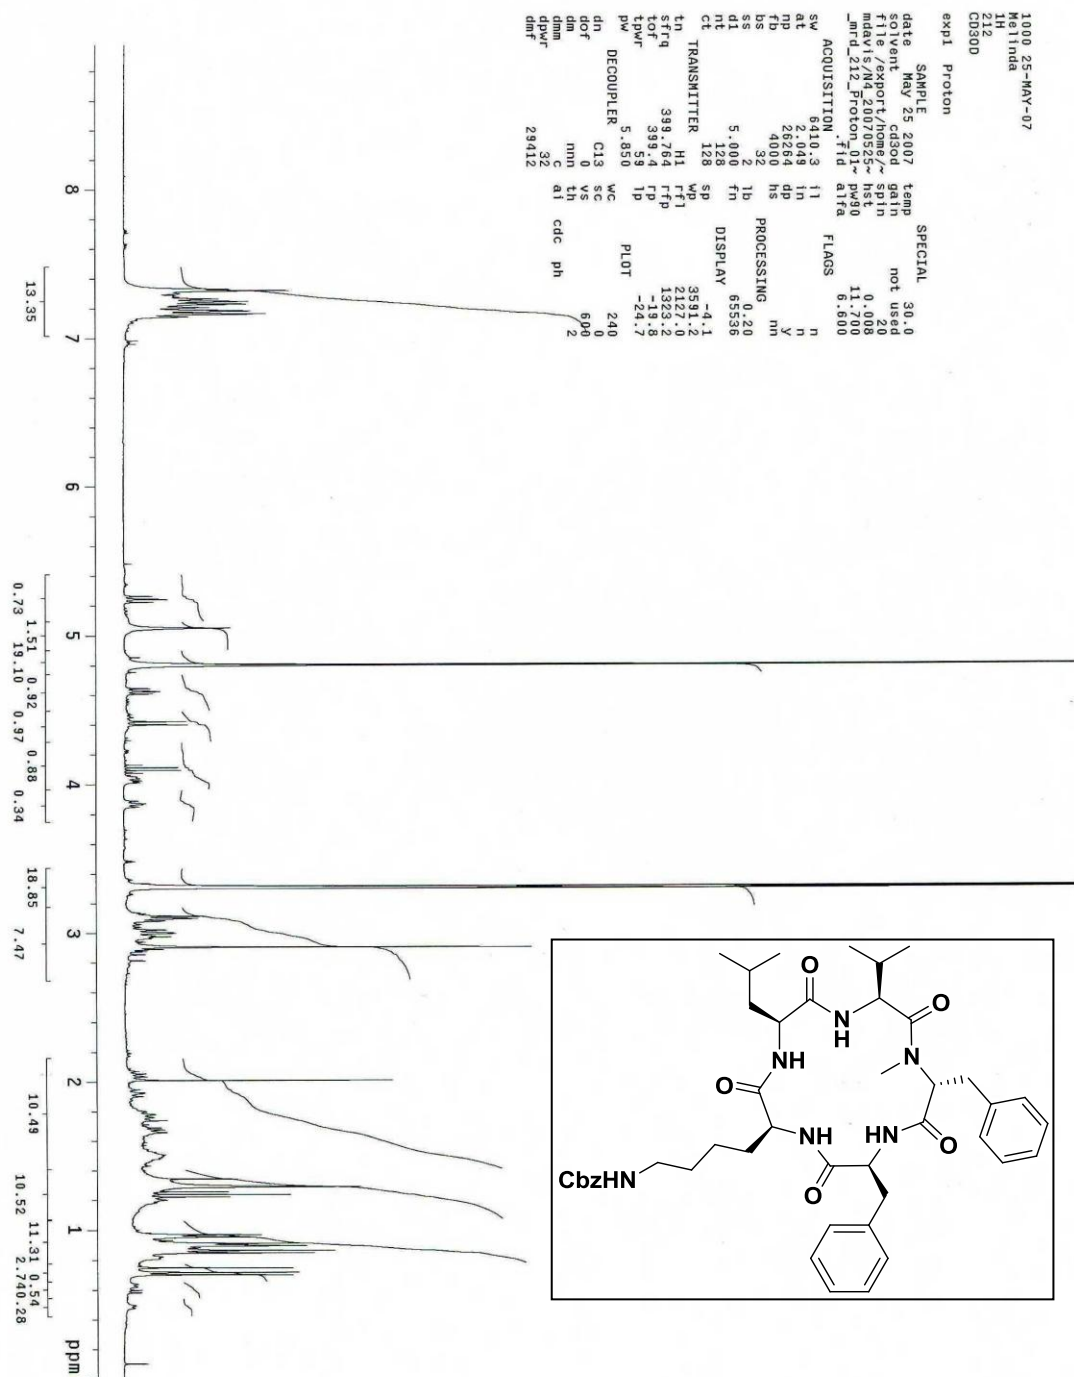

Compound 28 NMR Cyclized Pentapeptide Phe-N-Me-D-Phe-Val-Leu-Lys(Cbz)



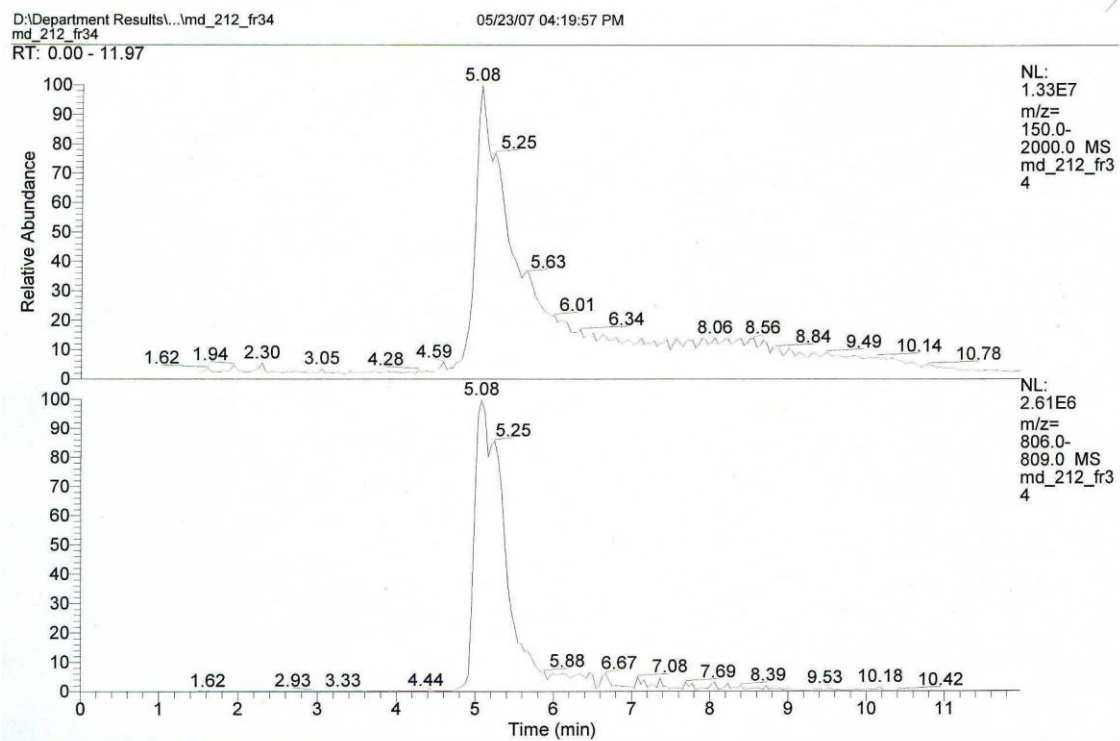

md\_212\_fr34 #91 RT: 5.08 AV: 1 NL: 1.73E6  
T: + c ESI Full ms [ 150.00-2000.00]

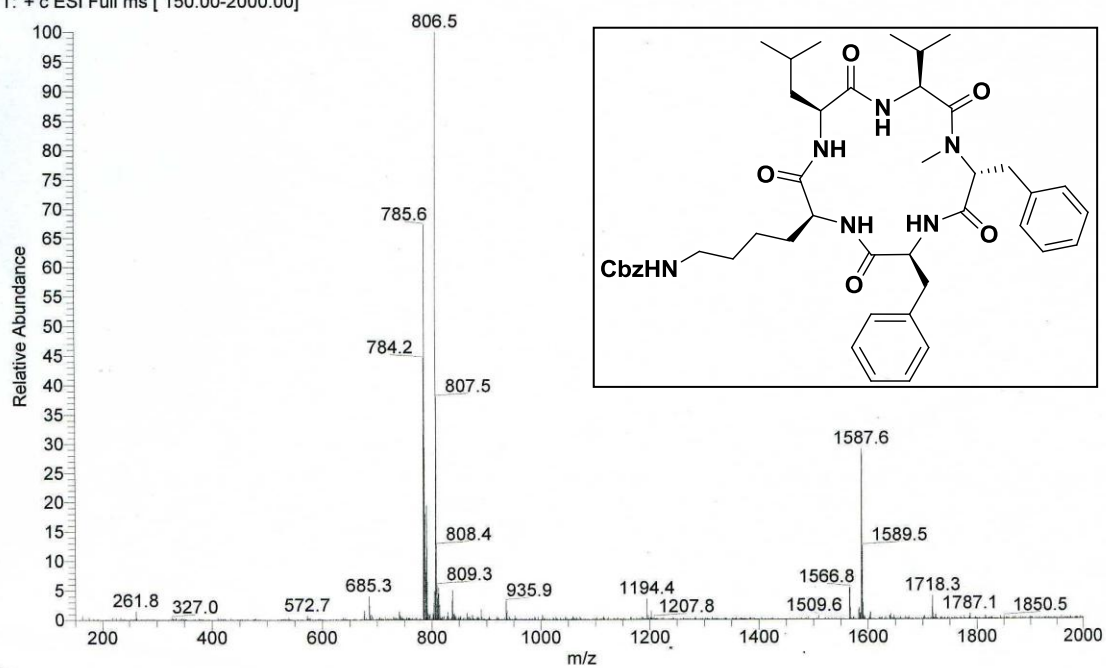

Compound 28 LCMS Cyclized Pentapeptide Phe-*N*-Me-D-Phe-Val-Leu-Lys(Cbz) (MW=783)

## Display Report - All Windows All Analyses

Operator: sdsu Instrument: Agilent 6330 Ion Trap Print Date: 7/1/2009 11:21:51 AM

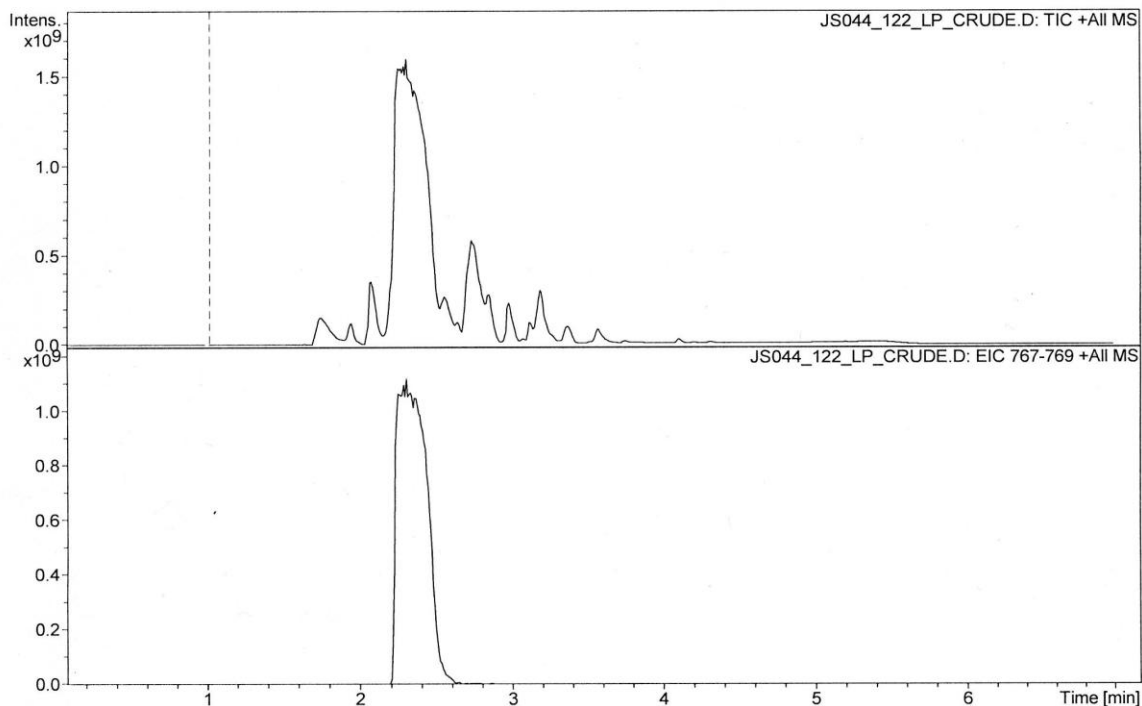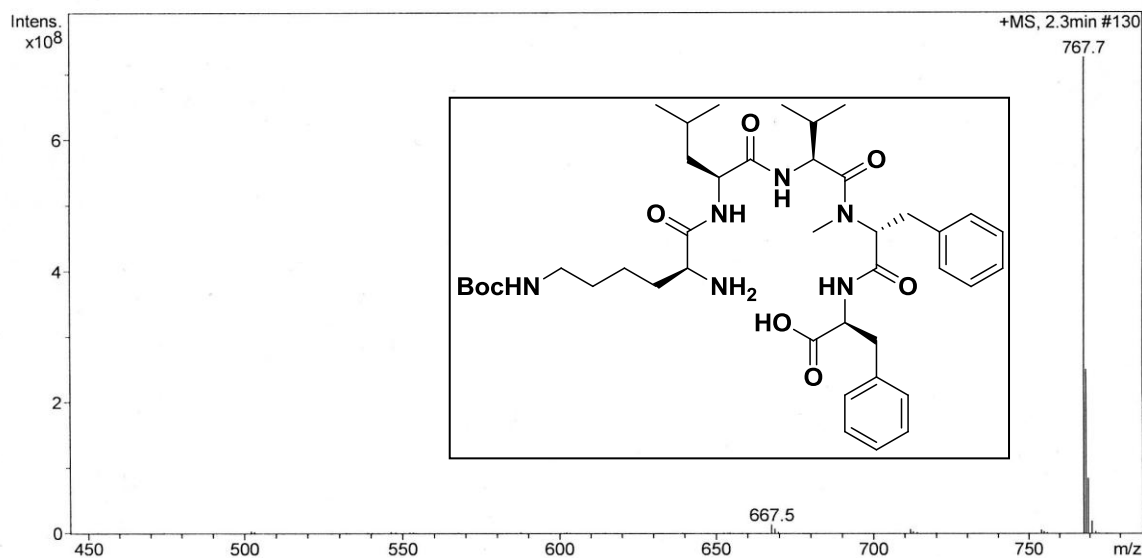

**Compound 29 LCMS Double Deprotected Linear Pentapeptide HO-Phe-N-Me-D-Phe-Val-Leu-Lys(Boc)-NH<sub>2</sub> (MW = 767)**

JES\_150\_cyc

expi Proton

|                     |                 |      |          |            |  |
|---------------------|-----------------|------|----------|------------|--|
| date                | Jun 26 2009     | temp | 30.0     | SPECIAL    |  |
| solvent             | cd3od           | gain | not used |            |  |
| file                | /home/waikup/~/ | spin | 20       |            |  |
| vmrSYS/data/waikup/ |                 | hst  | 0.008    |            |  |
| P/N4_20090626_JES_~ |                 | pw90 | 10.800   |            |  |
| 150_cyc_Proton_01.~ |                 | alfa | 10.000   | FLAGS      |  |
| f1d                 |                 |      |          |            |  |
| ACQUISITION         | f1d             | i1   | n        |            |  |
| sw                  | 6410.3          | in   | n        |            |  |
| at                  | 3.000           | dp   | y        |            |  |
| mp                  | 6410            | hs   | m        | PROCESSING |  |
| fd                  | 4092            | lb   | m        |            |  |
| rs                  | 18              | fn   | 65536    |            |  |
| ds                  | 1.000           | sd   | -0.0     | DISPLAY    |  |
| dt                  | 64              | wd   | 3597.7   |            |  |
| nt                  | 64              | rf1  | 843.7    |            |  |
| ct                  |                 |      | 108.7    |            |  |
| tn                  | 399.761         | fp   | 0.3      |            |  |
| sfreq               | 399.761         | lp   | 0.3      | PL0T       |  |
| tof                 | 399.8           |      |          |            |  |
| tpwr                | 59              |      |          |            |  |
| pw                  | 5.400           | WC   | 240      |            |  |
| DECOUPLER           | C13             | VS   | 2448     |            |  |
| dn                  |                 | th   | 0        |            |  |
| dof                 | 0               | at   | cdc      | ph         |  |
| dm                  | 0               |      |          |            |  |
| dmm                 | nmn             |      |          |            |  |
| dpwr                | c               |      |          |            |  |
| dmf                 | 31              |      |          |            |  |
|                     | 29412           |      |          |            |  |

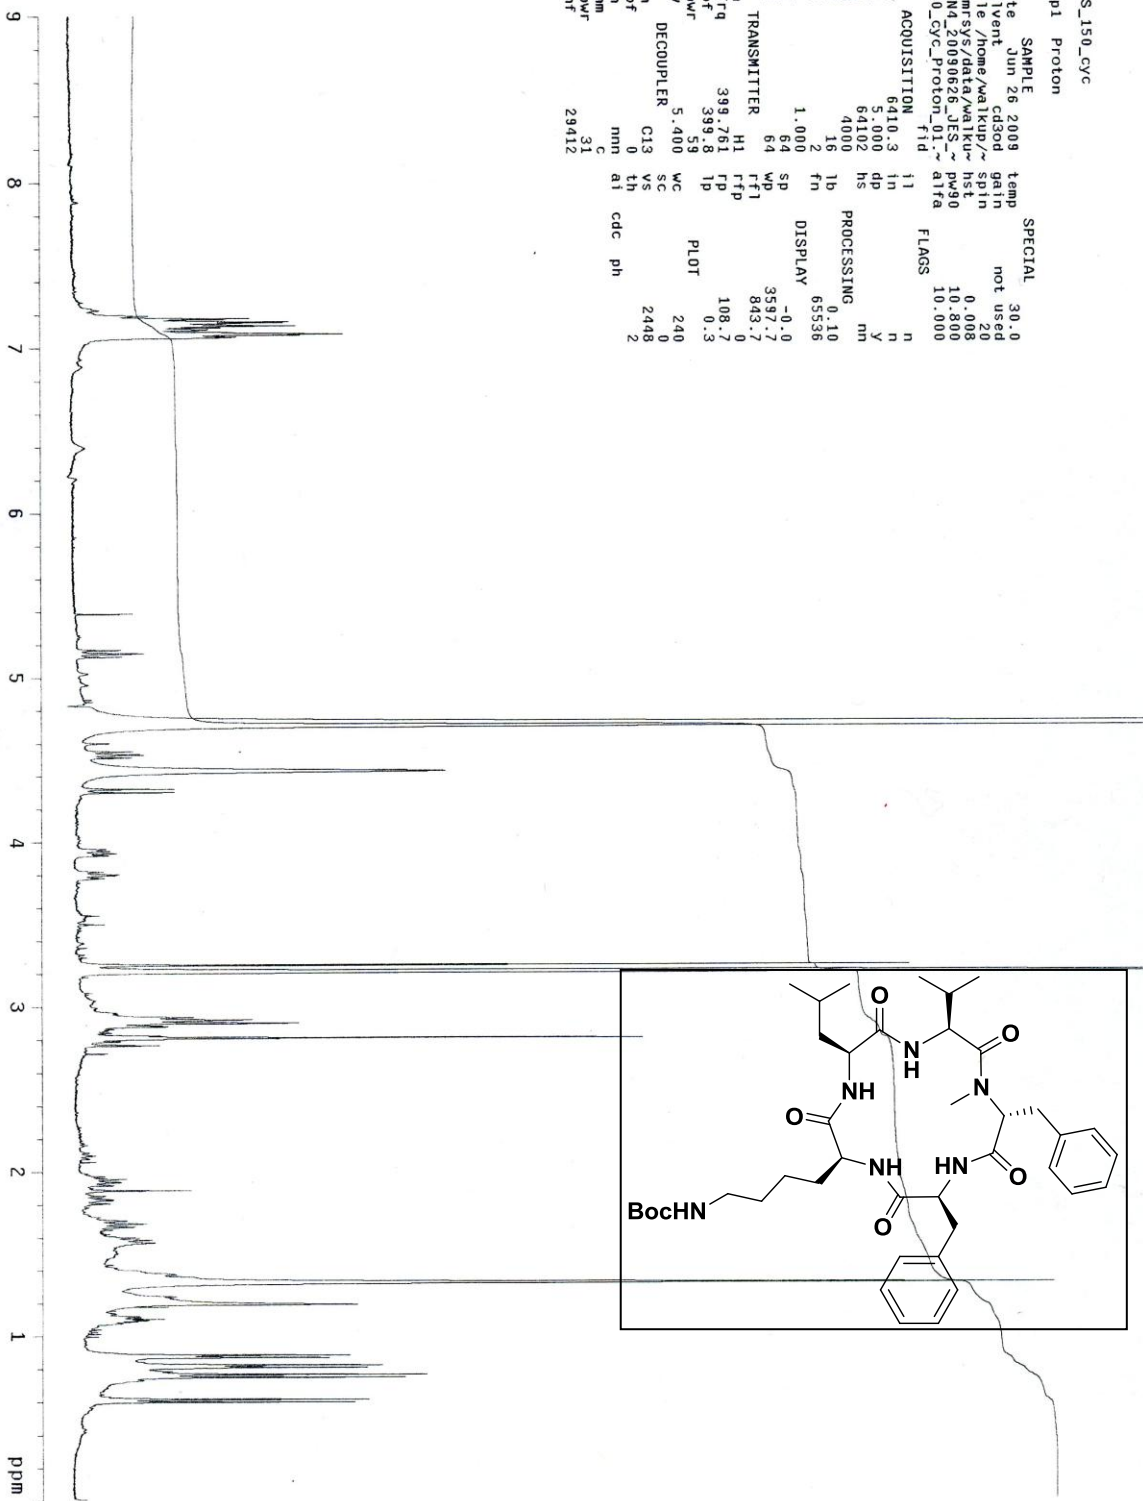

Compound 29 NMR Cyclized Pentapeptide Phe-N-Me-D-Phe-Val-Leu-Lys(Boc)

## Display Report - All Windows All Analyses

Operator: sdsu Instrument: Agilent 6330 Ion Trap Print Date: 7/1/2009 11:19:51 AM

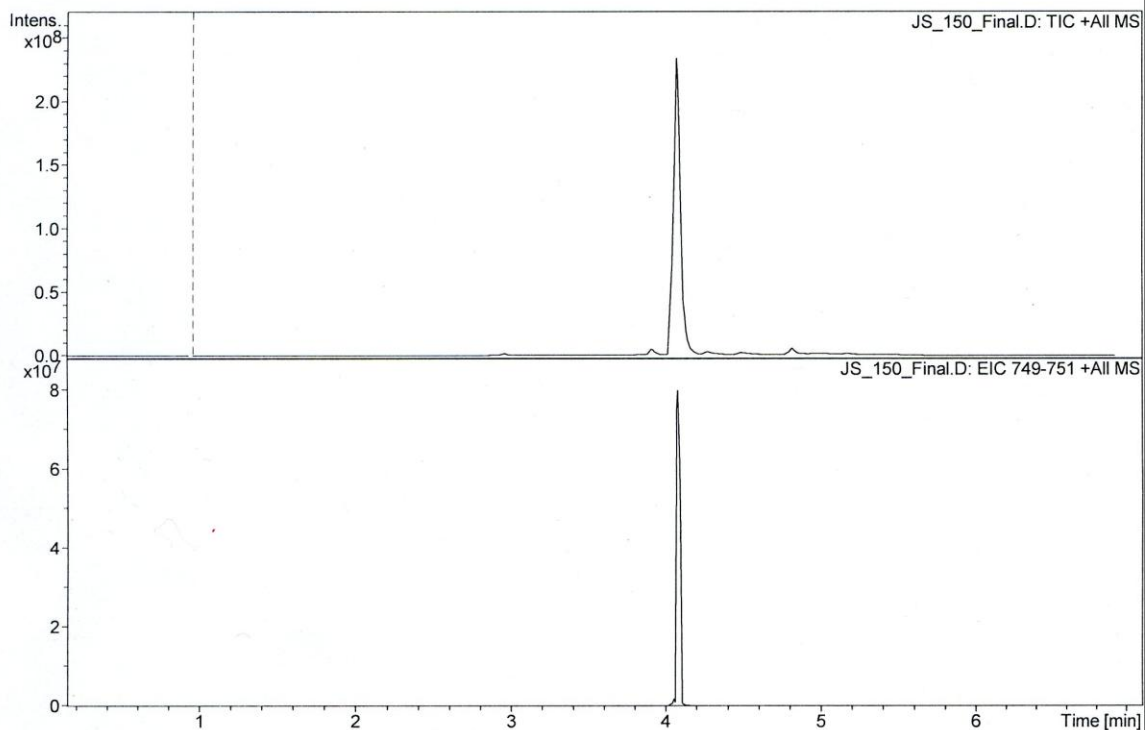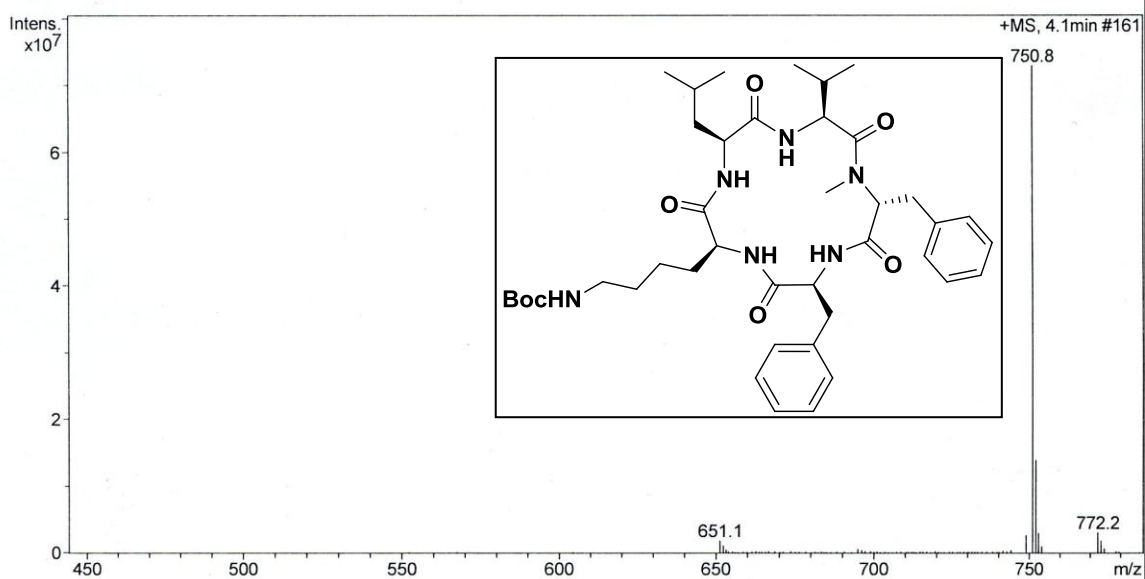

Compound 29 LCMS Cyclized Pentapeptide Phe-N-Me-D-Phe-Val-Leu-Lys(Boc) (MW=749)

## SDSU

Project Name: Defaults  
Reported by User: System

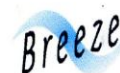

## SAMPLE INFORMATION

|              |               |                   |                      |
|--------------|---------------|-------------------|----------------------|
| Sample Name: | JS_150_final  | Acquired By:      | System               |
| Sample Type: | Unknown       | Sample Set Name:  |                      |
| Vial:        | 1             | Acq. Method:      | primary_sanA_ss_ACN  |
| Injection #: | 582           | Date Acquired:    | 7/1/2009 10:28:20 AM |
| Run Time:    | 16.00 Minutes | Injection Volume: | 30.00 ul             |

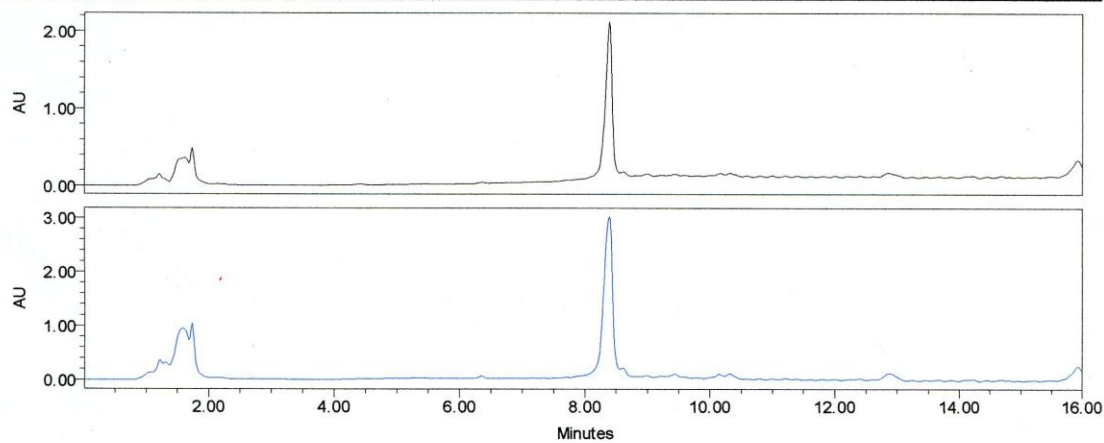

— Channel: 2487Channel 1 Channel Desc.: Processing Method: \*\*\*\*  
— Channel: 2487Channel 2 Channel Desc.: Processing Method: \*\*\*\*

| Peak Name | RT (min) | Area (μV*sec) | % Area | Height (μV) | Amount | Units |
|-----------|----------|---------------|--------|-------------|--------|-------|
| 1 ****    | ****     | ****          | ****   | ****        | ****   | ****  |
| 2 ****    | ****     | ****          | ****   | ****        | ****   | ****  |

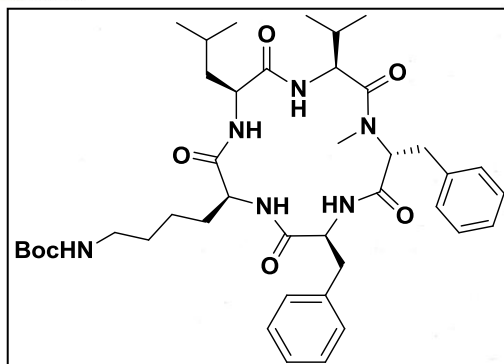

## Compound 29 HPLC Cyclized Pentapeptide Phe-N-Me-D-Phe-Val-Leu-Lys(Boc)

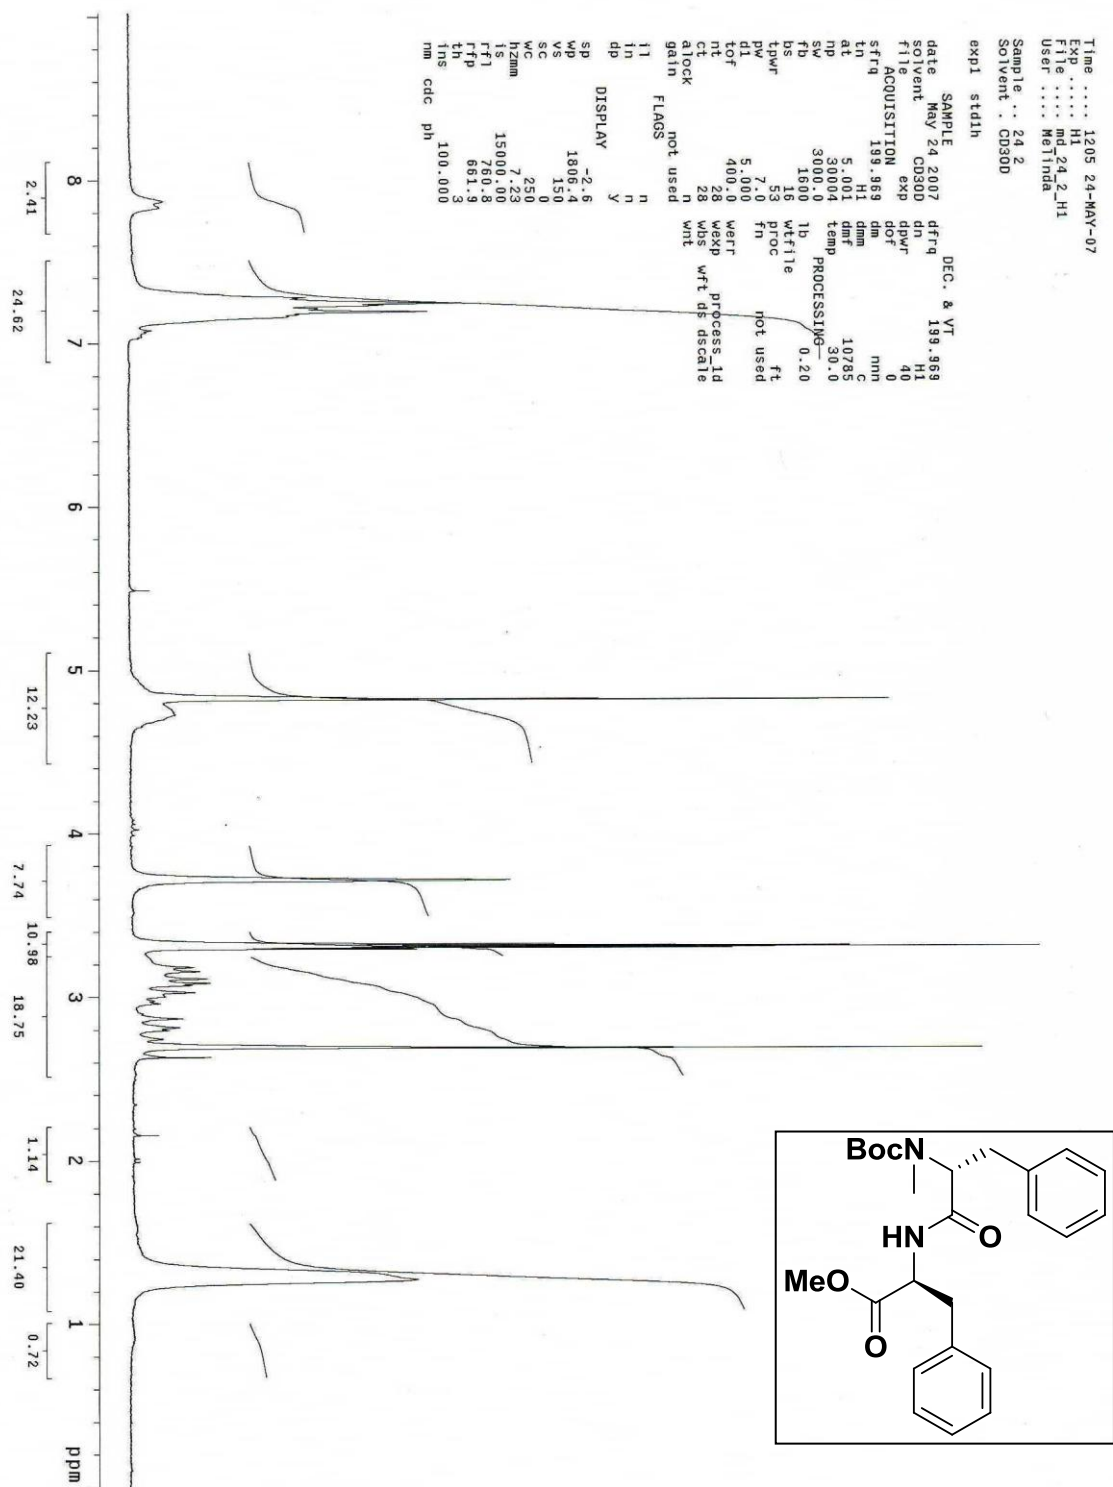

Compound 30 NMR Dipeptide MeO-Phe-N-Me-D-Phe-NBoc

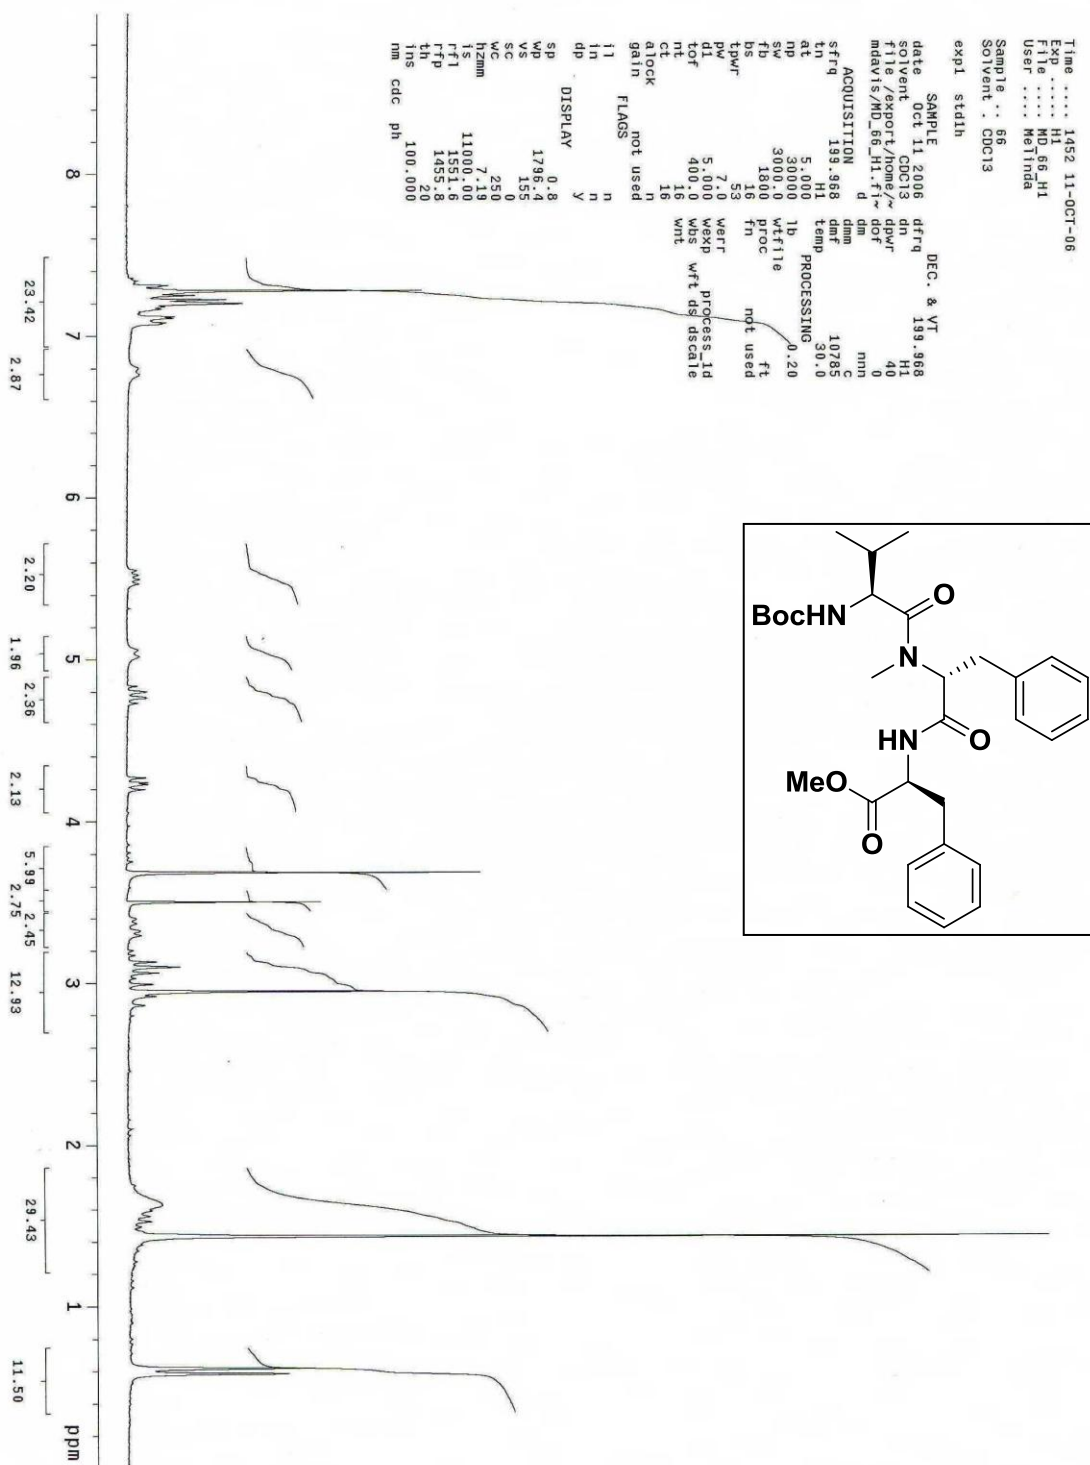

Compound 30 NMR Tripeptide MeO-Phe-N-Me-D-Phe-Val-NHBoc



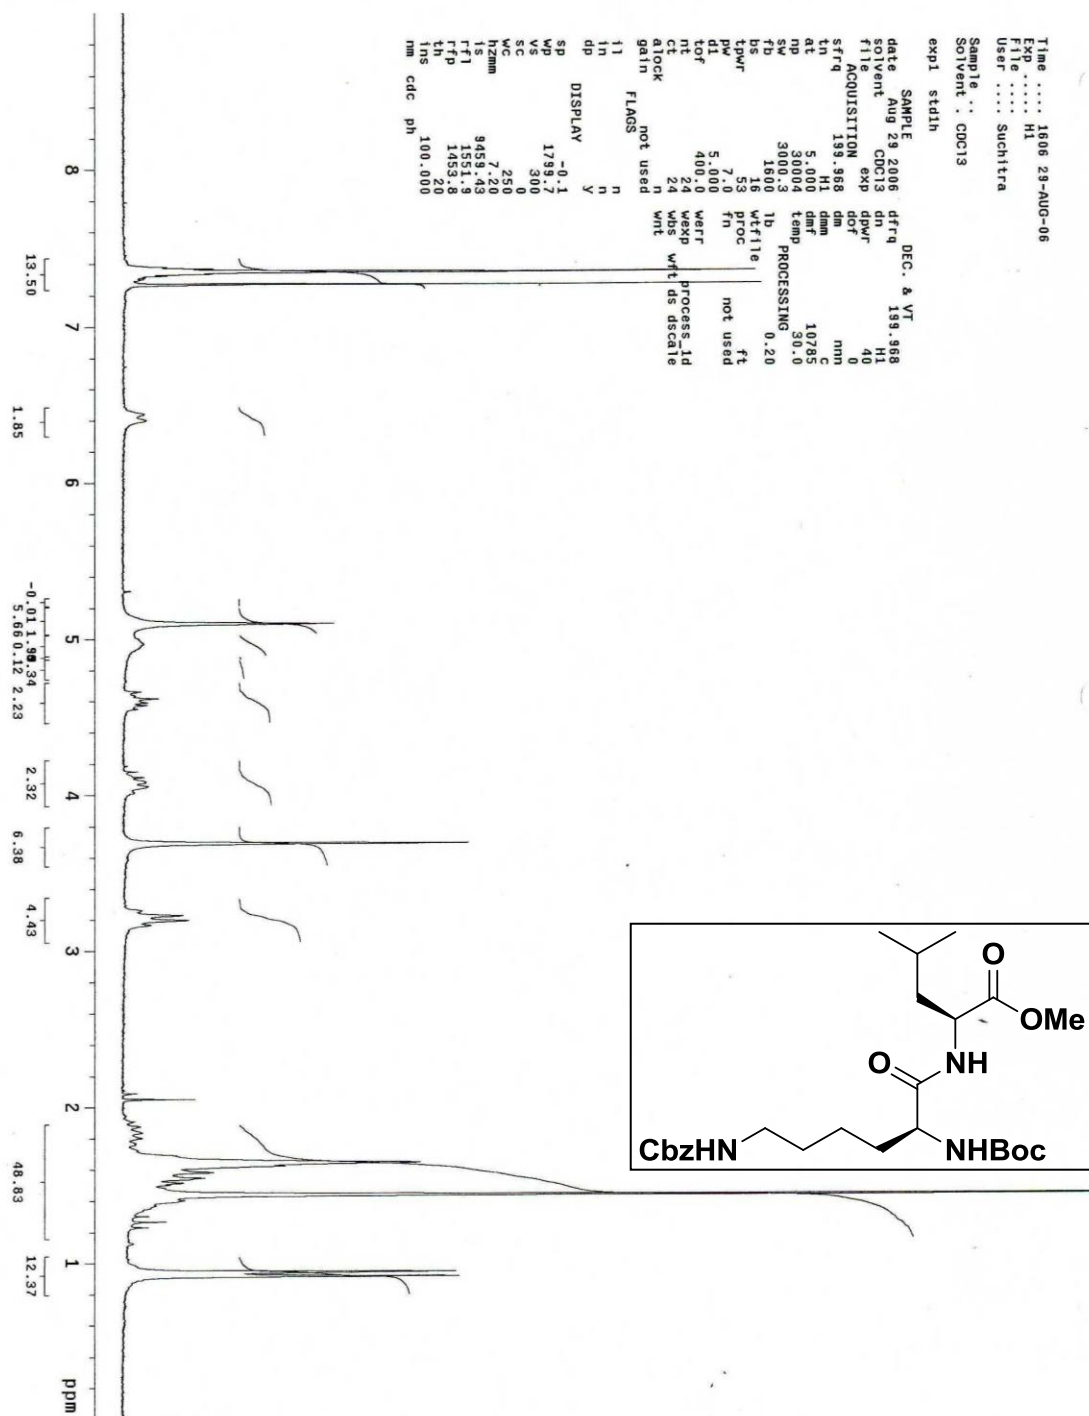

Compound 30 NMR Dipeptide MeO-Leu-Lys(Cbz)-NH-Boc



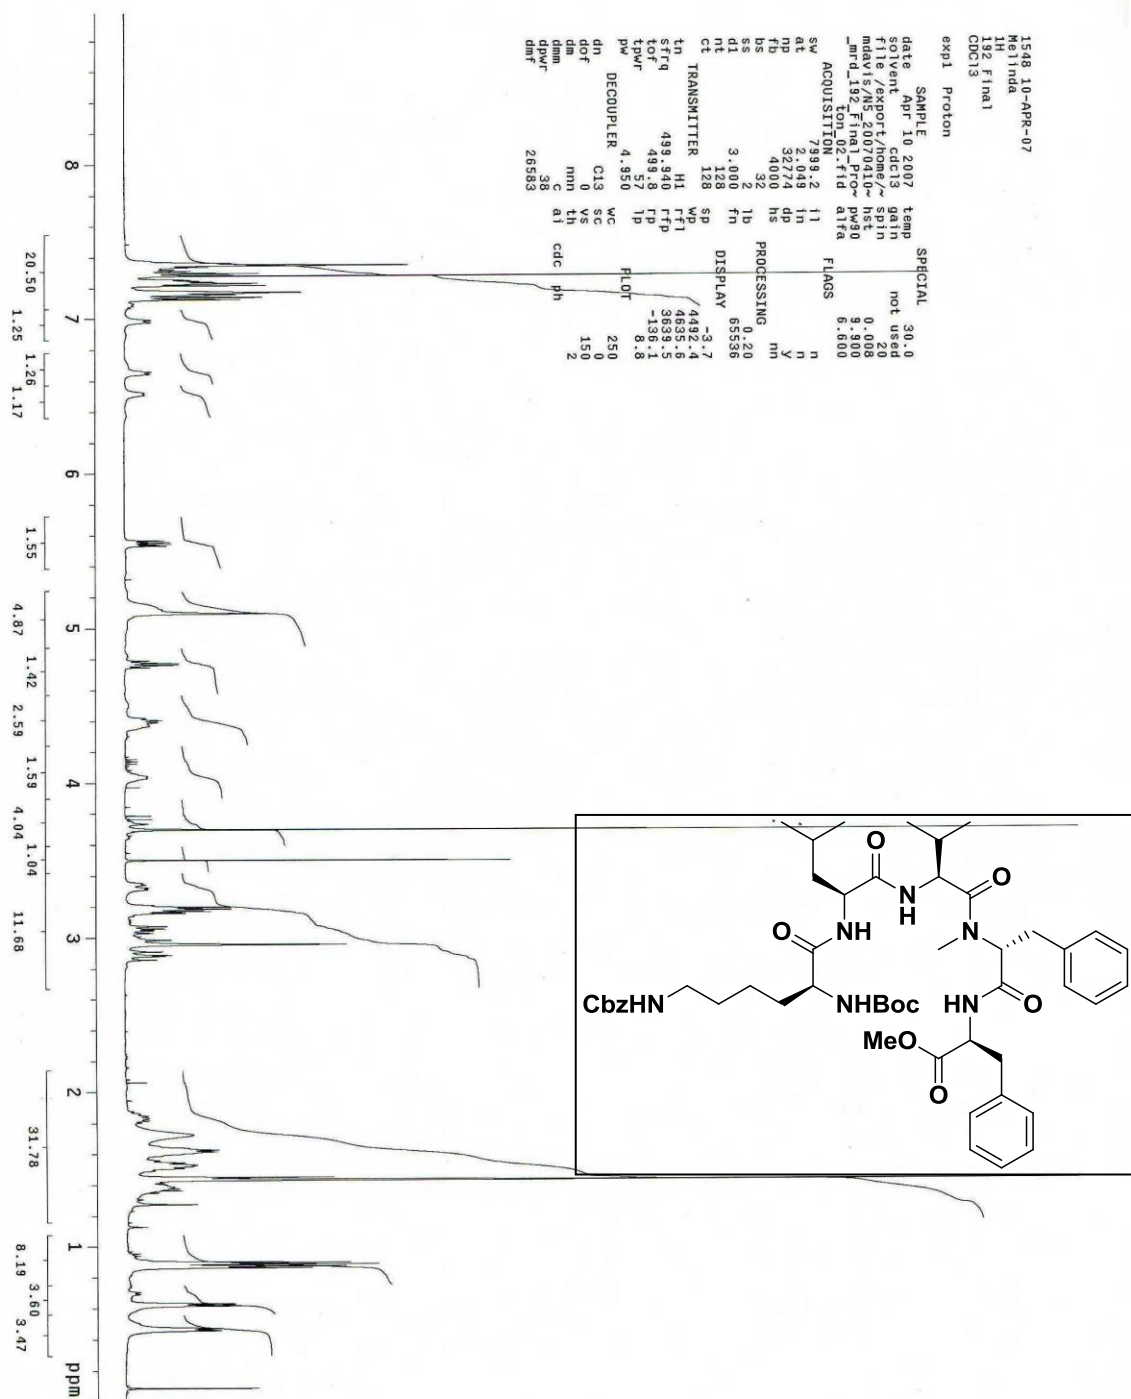

Compound 30 NMR Linear Pentapeptide MeO-Phe-N-Me-D-Phe-Val-Leu-Lys(Cbz)-NHBOC

## Display Report - All Windows Selected Analysis

**Analysis Name:** MD000014.D    **Instrument:** Agilent 6330 Ion Trap    **Print Date:** 5/16/2008 5:28:06 PM  
**Method:** SANA.M    **Operator:** sdsu    **Acq. Date:** 2/28/2008 2:18:45 PM  
**Sample Name:** md\_122LP  
**Analysis Info:**

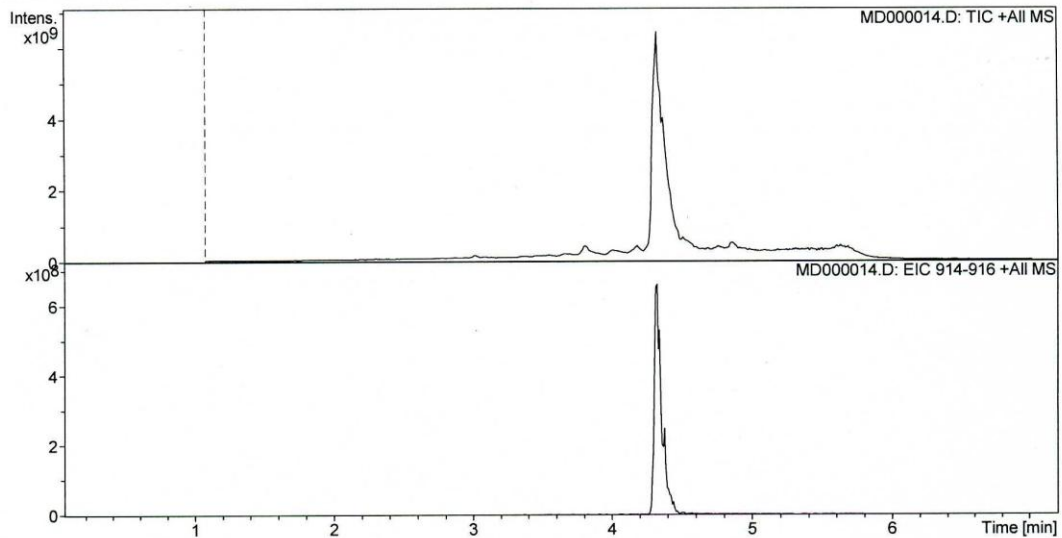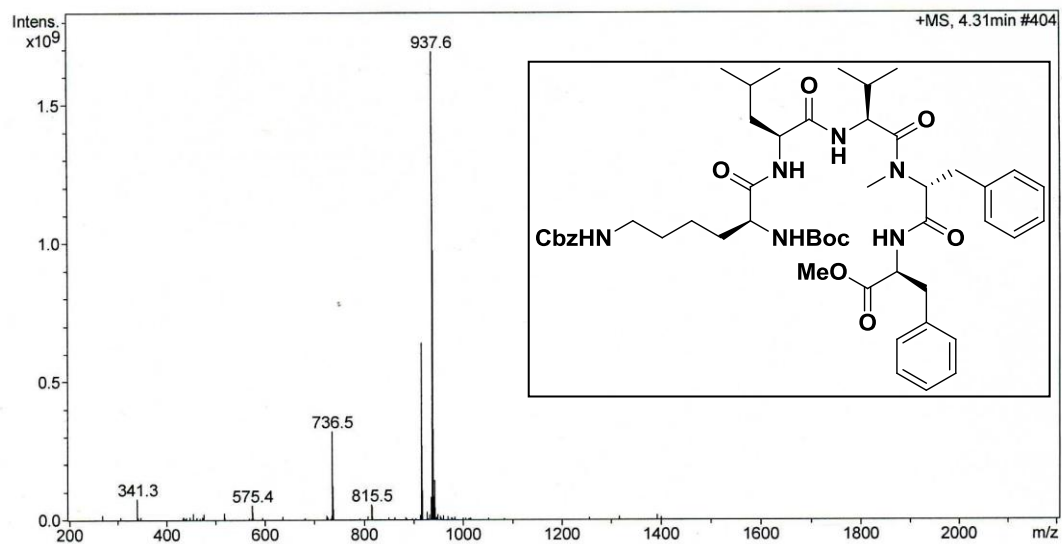

**Compound 30 LCMS Linear Pentapeptide MeO-Phe-N-Me-D-Phe-Val-Leu-Lys(Cbz)-NHBoc (MW=915)**

## Display Report - All Windows Selected Analysis

**Analysis Name:** MD\_24\_11A12N **Instrument:** Agilent 6330 Ion Trap **Print Date:** 5/16/2008 5:38:07 PM  
**Method:** SANA.M 13A14C15N.D **Operator:** sdsu **Acq. Date:** 3/10/2008 1:37:49 PM  
**Sample Name:** MD\_24\_11a12n13a14c15n  
**Analysis Info:**

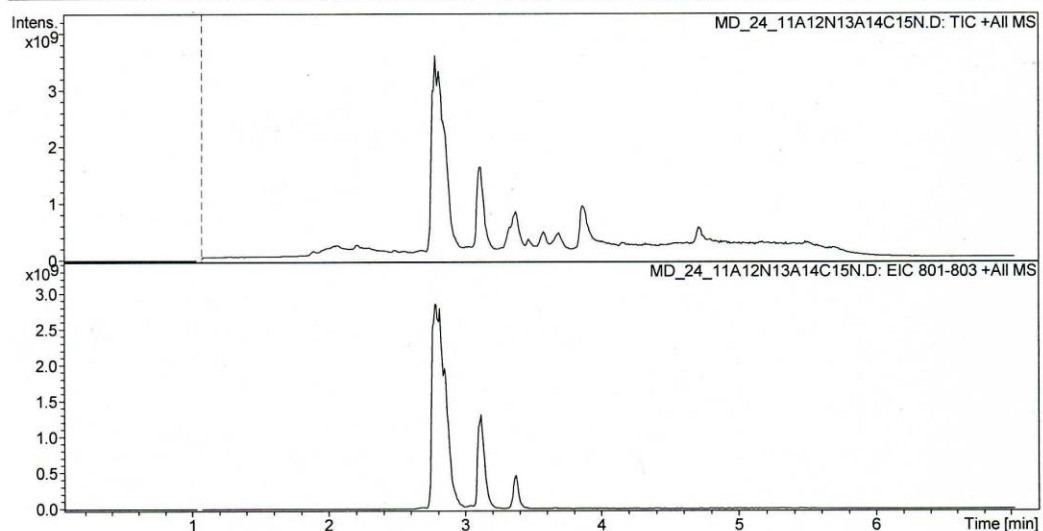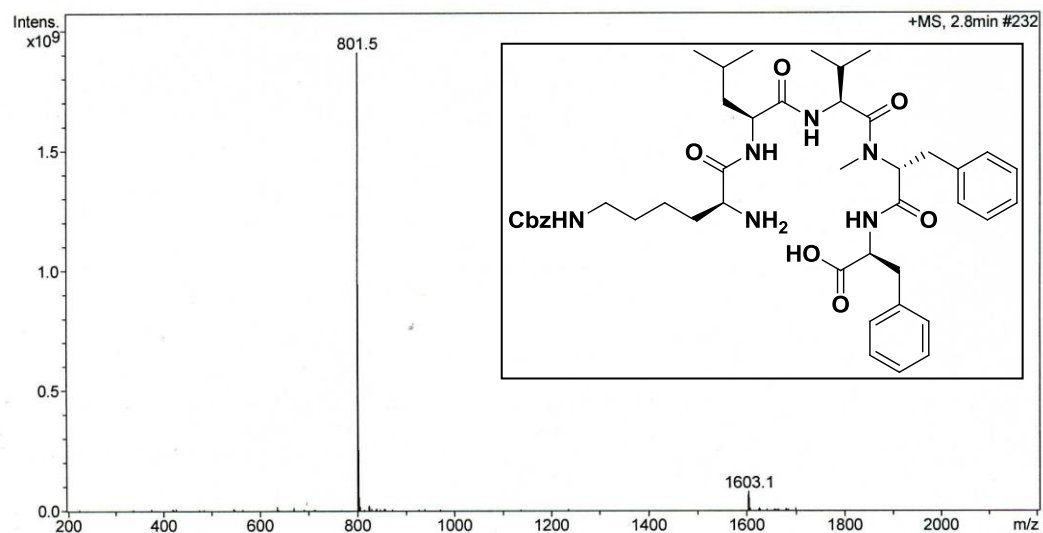

**Compound 30 LCMS Double Deprotected Linear Pentapeptide HO-Phe-N-Me-D-Phe-Val-Leu-Lys(Cbz)-NH<sub>2</sub> (MW=801)**

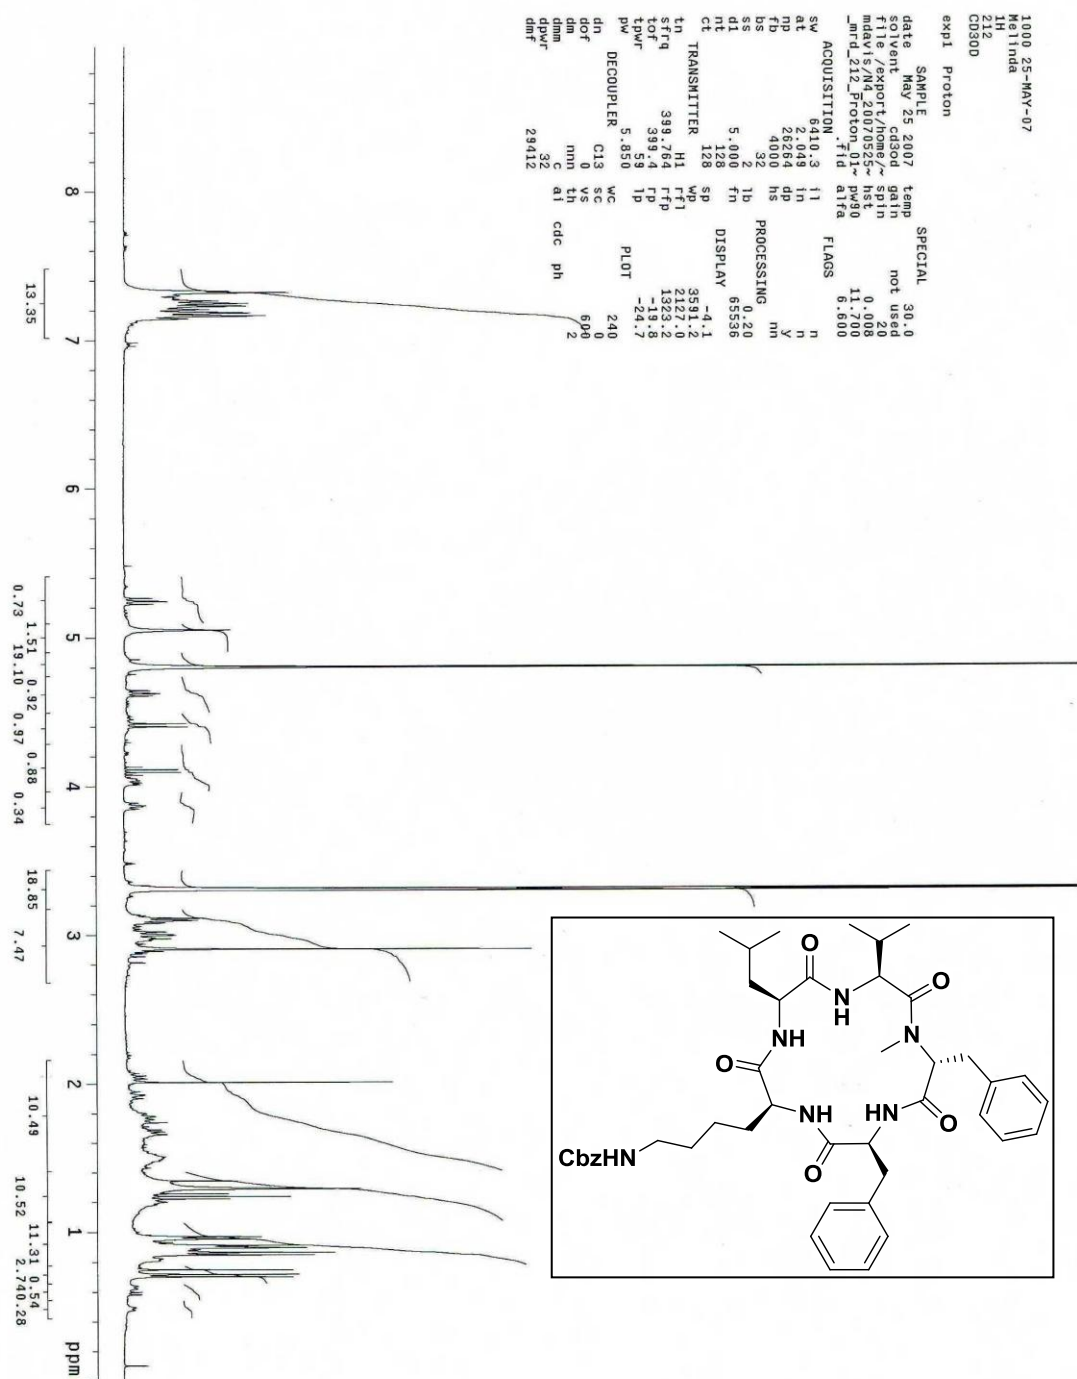

Compound 30 NMR Cyclized Protected Pentapeptide Phe-N-Me-D-Phe-Val-Leu-Lys(Cbz)

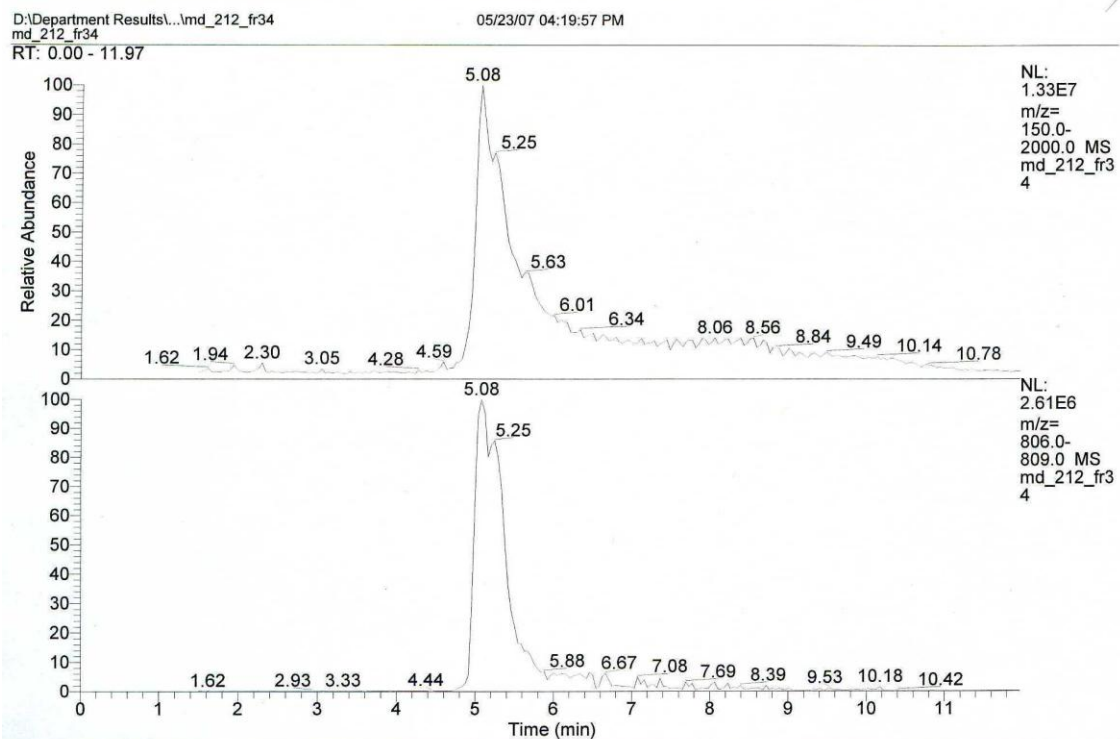

md\_212\_fr34 #91 RT: 5.08 AV: 1 NL: 1.73E6  
T: + c ESI Full ms [ 150.00-2000.00]

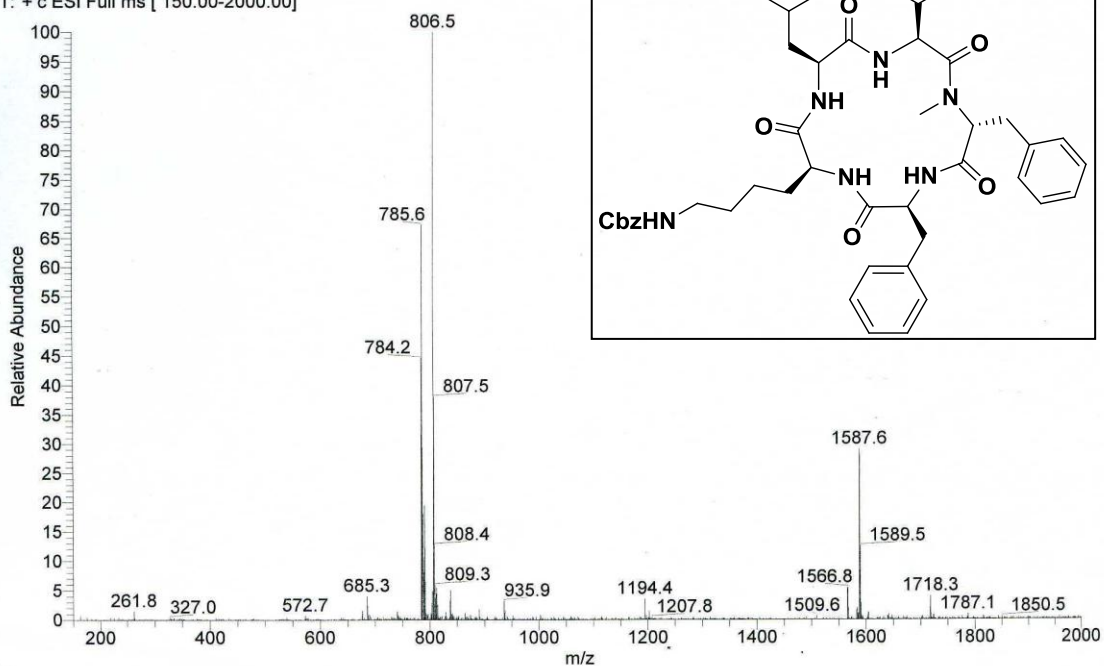

**Compound 30 LCMS Cyclized Protected Pentapeptide Phe-N-Me-D-Phe-Val-Leu-Lys(Cbz)**  
(MW=783)

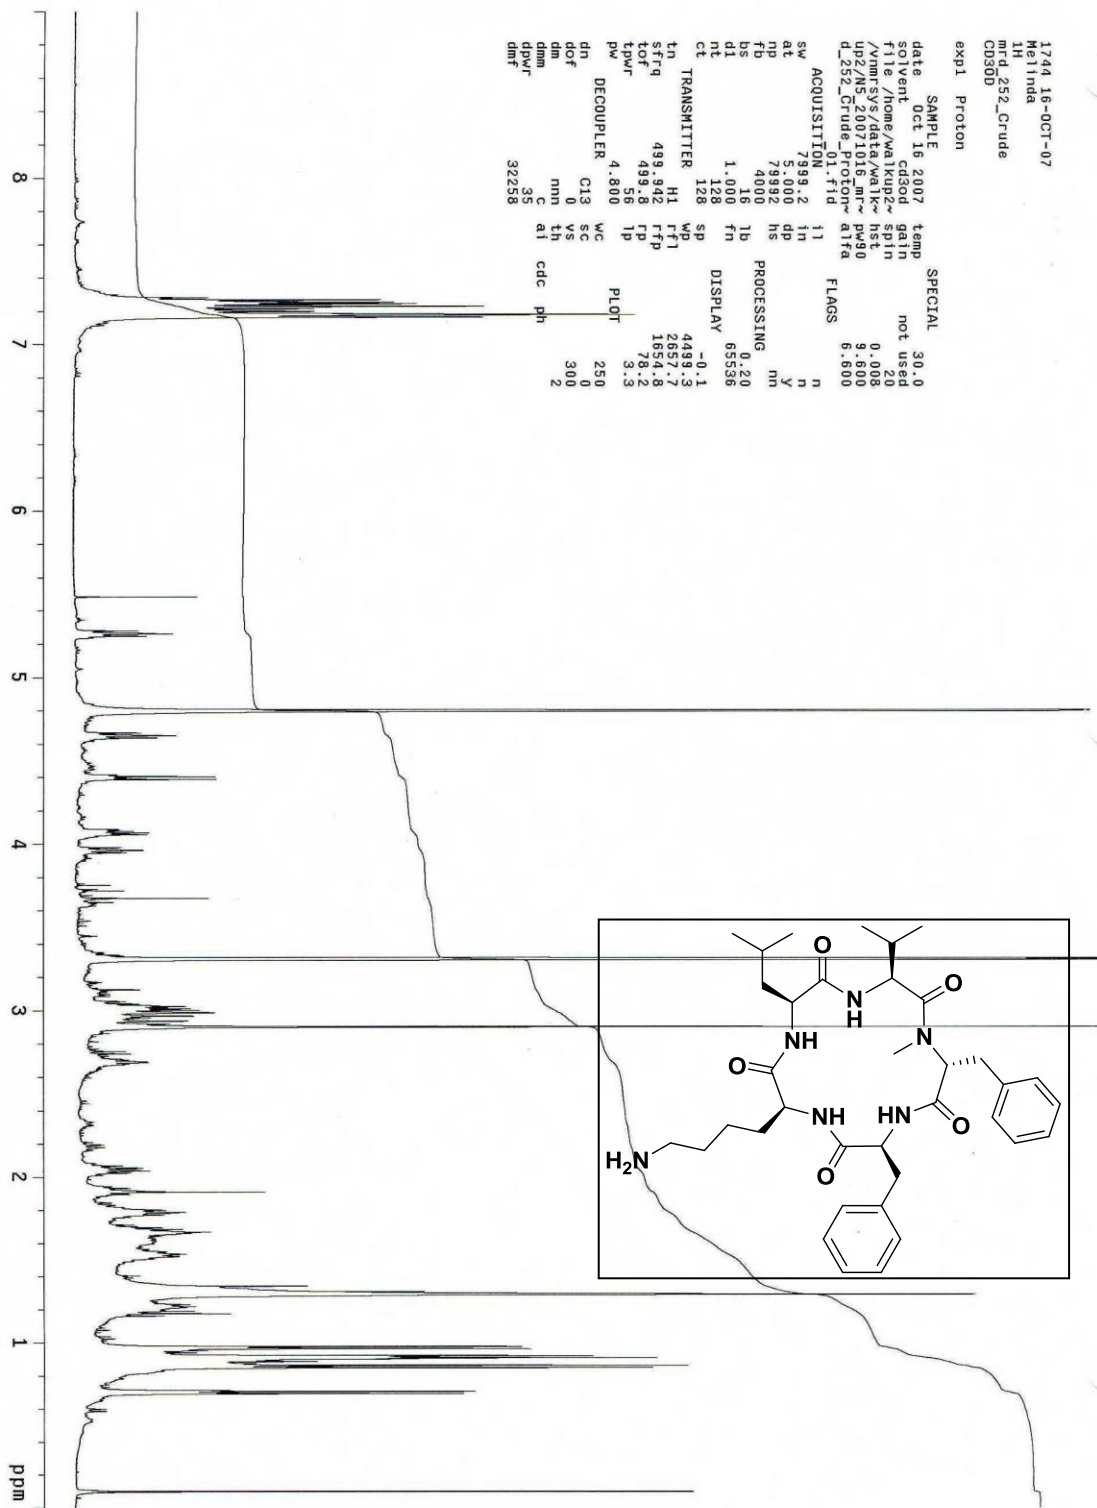

Compound 30 NMR Cyclized Pentapeptide Phe-N-Me-D-Phe-Val-Leu-Lys

MD\_252-crud

10/18/2007 8:35:18 PM

RT: 0.01 - 15.99

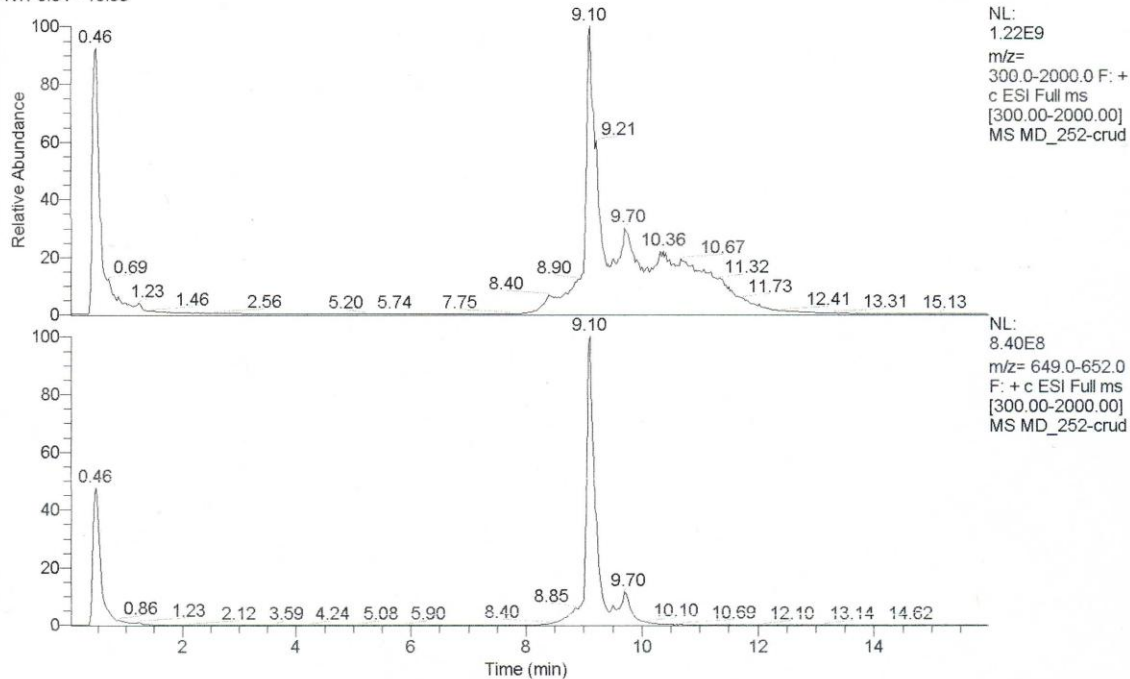MD\_252-crud #375 RT: 9.10 AV: 1 NL: 6.48E8  
F: + c ESI Full ms [300.00-2000.00]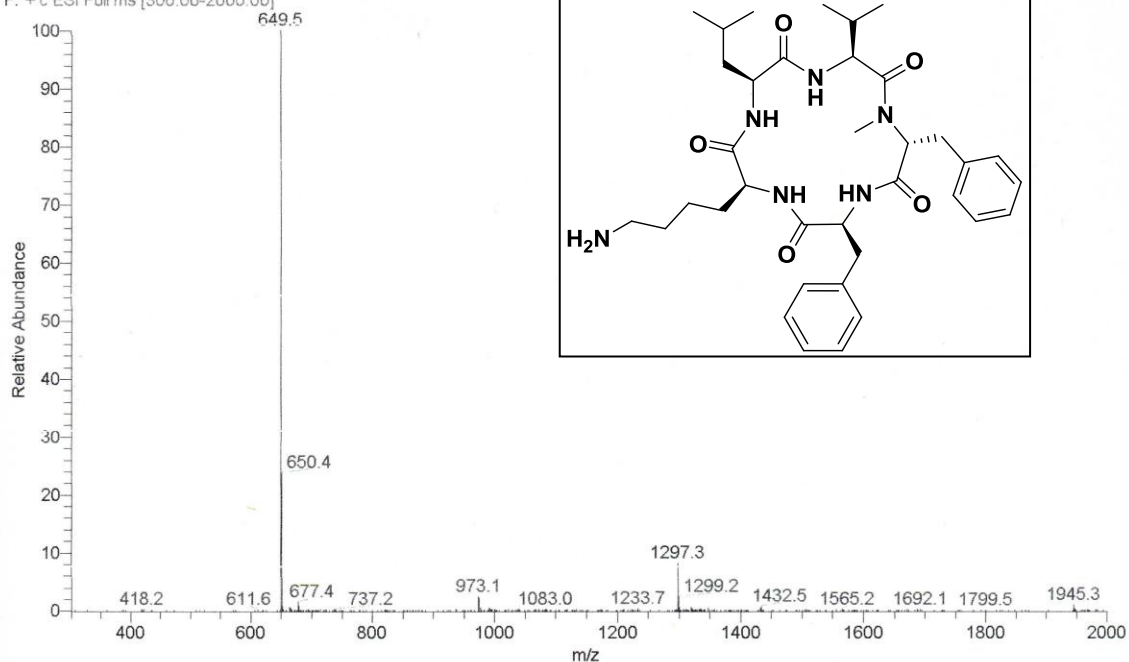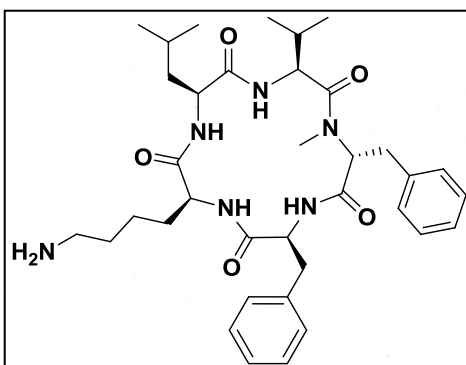

**Compound 30 LCMS Cyclized Pentapeptide Phe-N-Me-D-Phe-Val-Leu-Lys (MW=649)**



San Diego State University; Department of Chemis

Project Name: Defaults

Reported by User: shelli

Breeze

## SAMPLE INFORMATION

|              |                    |                   |                      |
|--------------|--------------------|-------------------|----------------------|
| Sample Name: | SanA_103_MD_031008 | Acquired By:      | shelli               |
| Sample Type: | Unknown            | Sample Set Name:  |                      |
| Vial:        | 1                  | Acq. Method:      | TT_SanA_ss           |
| Injection #: | 9                  | Date Acquired:    | 3/10/2008 5:59:08 PM |
| Run Time:    | 17.00 Minutes      | Injection Volume: | 25.00 ul             |

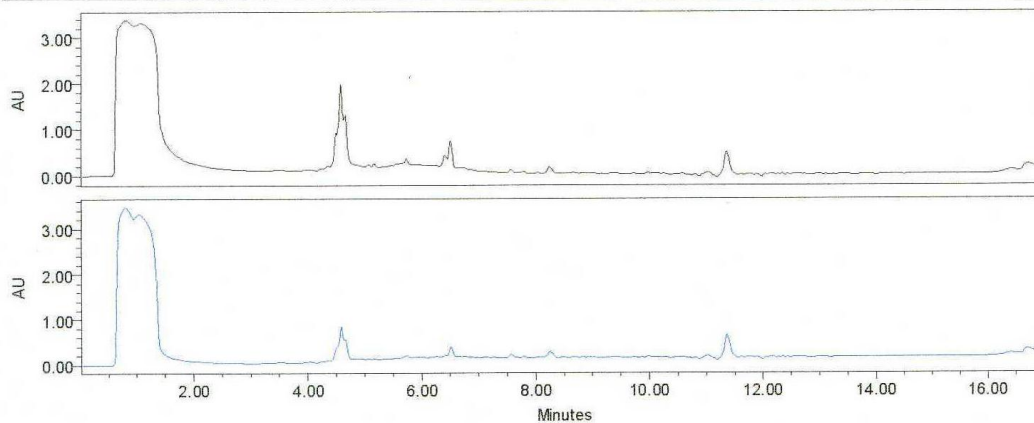

— Channel: 2487Channel 1 Channel Desc.: Processing Method: \*\*\*\*  
 — Channel: 2487Channel 2 Channel Desc.: Processing Method: \*\*\*\*

| Peak Name | RT (min) | Area ( $\mu\text{V}\cdot\text{sec}$ ) | % Area | Height ( $\mu\text{V}$ ) | Amount | Units |
|-----------|----------|---------------------------------------|--------|--------------------------|--------|-------|
| 1 ****    | ****     | ****                                  | ****   | ****                     | ****   | ****  |
| 2 ****    | ****     | ****                                  | ****   | ****                     | ****   | ****  |

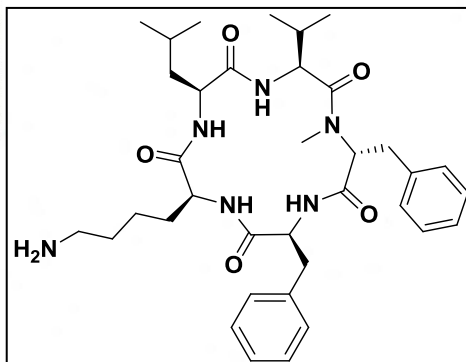

## Compound 30 HPLC Cyclized Pentapeptide Phe-N-Me-D-Phe-Val-Leu-Lys



## Display Report - All Windows Selected Analysis

**Analysis Name:** ED\_DD\_1\_5TH\_ **Instrument:** Agilent 6330 Ion Trap **Print Date:** 4/22/2009 1:51:45 PM  
**Method:** SANA.M TAG.D **Operator:** sdsu **Acq. Date:** 3/30/2009 1:51:37 PM  
**Sample Name:** ED\_dd\_1\_5th\_tag  
**Analysis Info:**

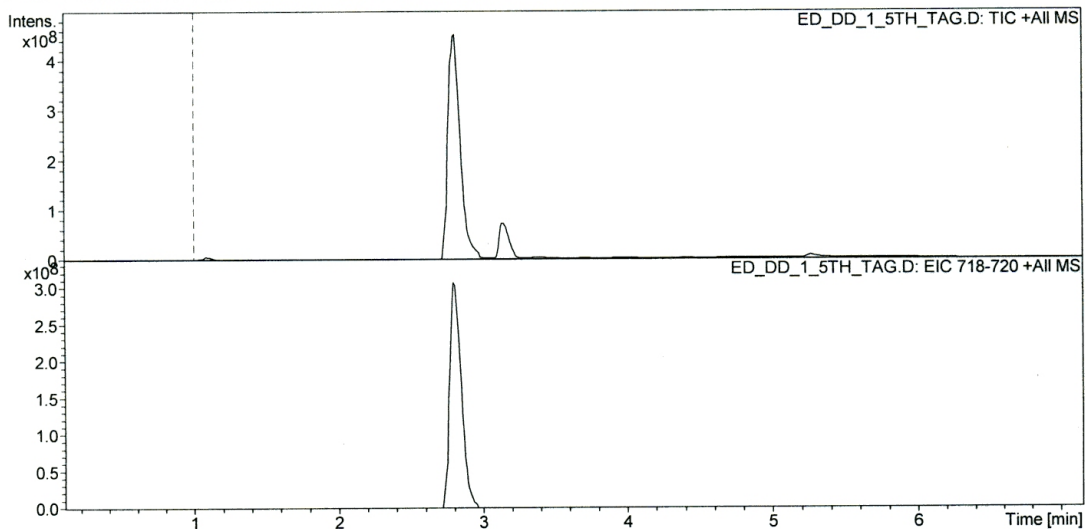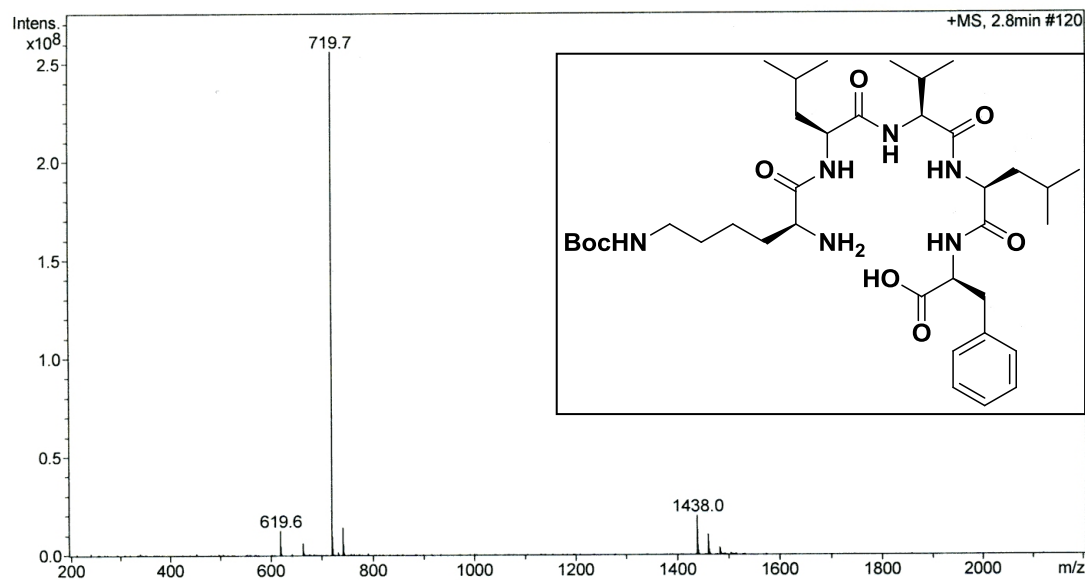

**Compound 31 LCMS Double Deprotected Linear Pentapeptide HO-Phe-Leu-Val-Leu-Lys(Boc)-NH<sub>2</sub> (MW = 719)**

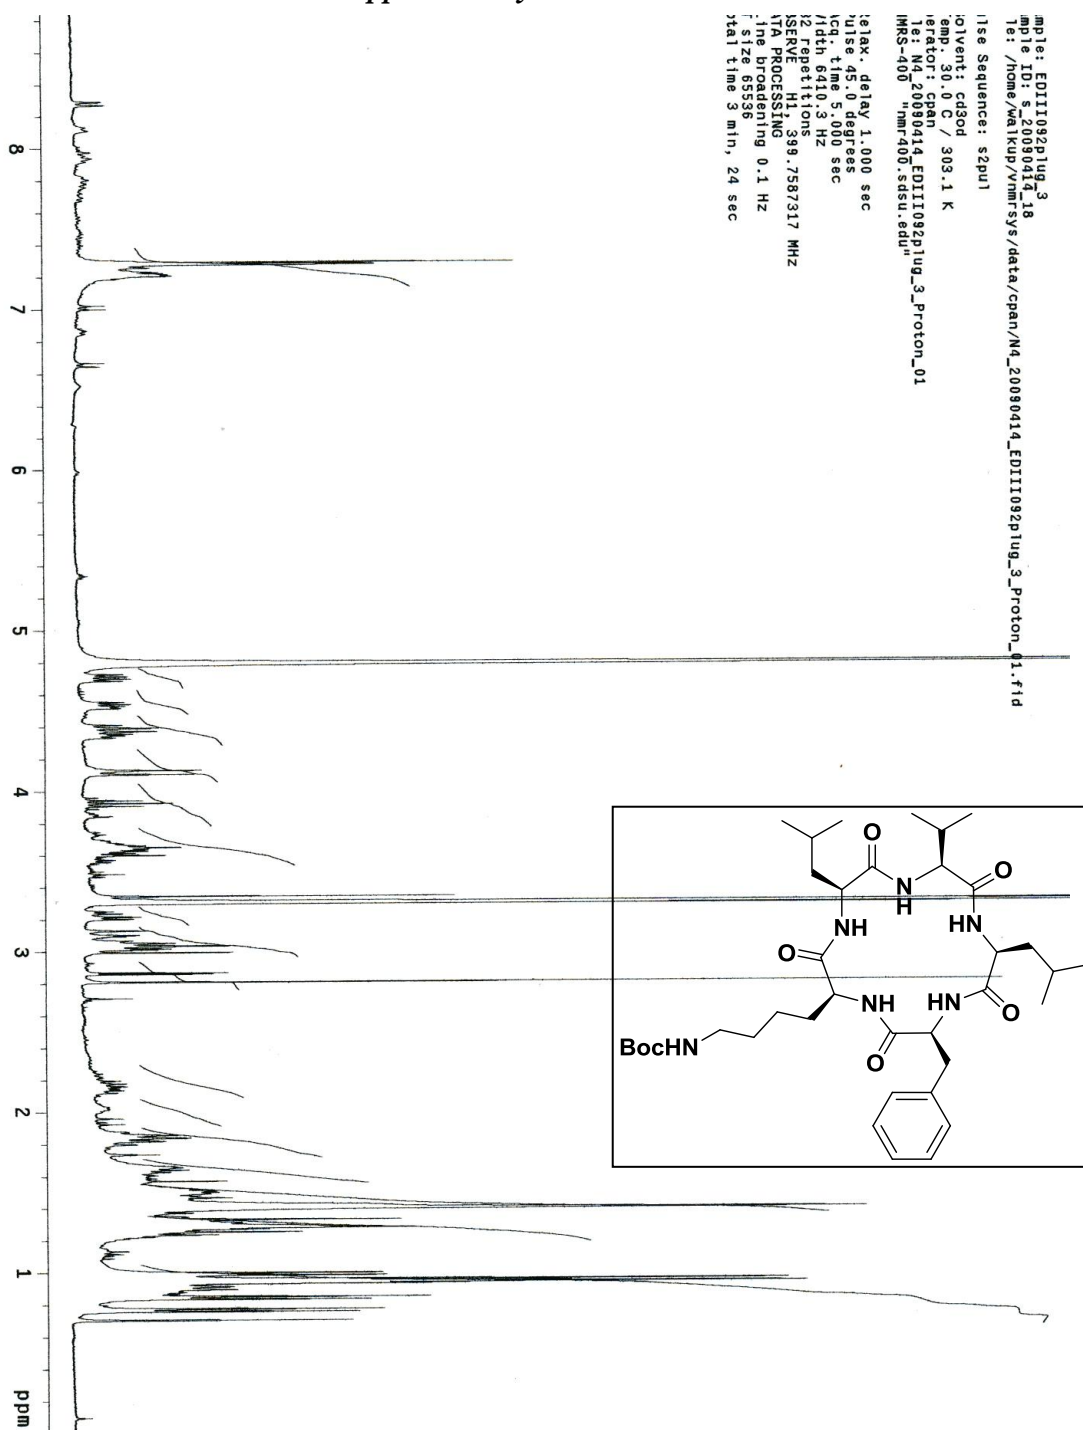

Compound 31 NMR Cyclized Pentapeptide Phe-Leu-Val-Leu-Lys(Boc)

## Display Report - All Windows All Analyses

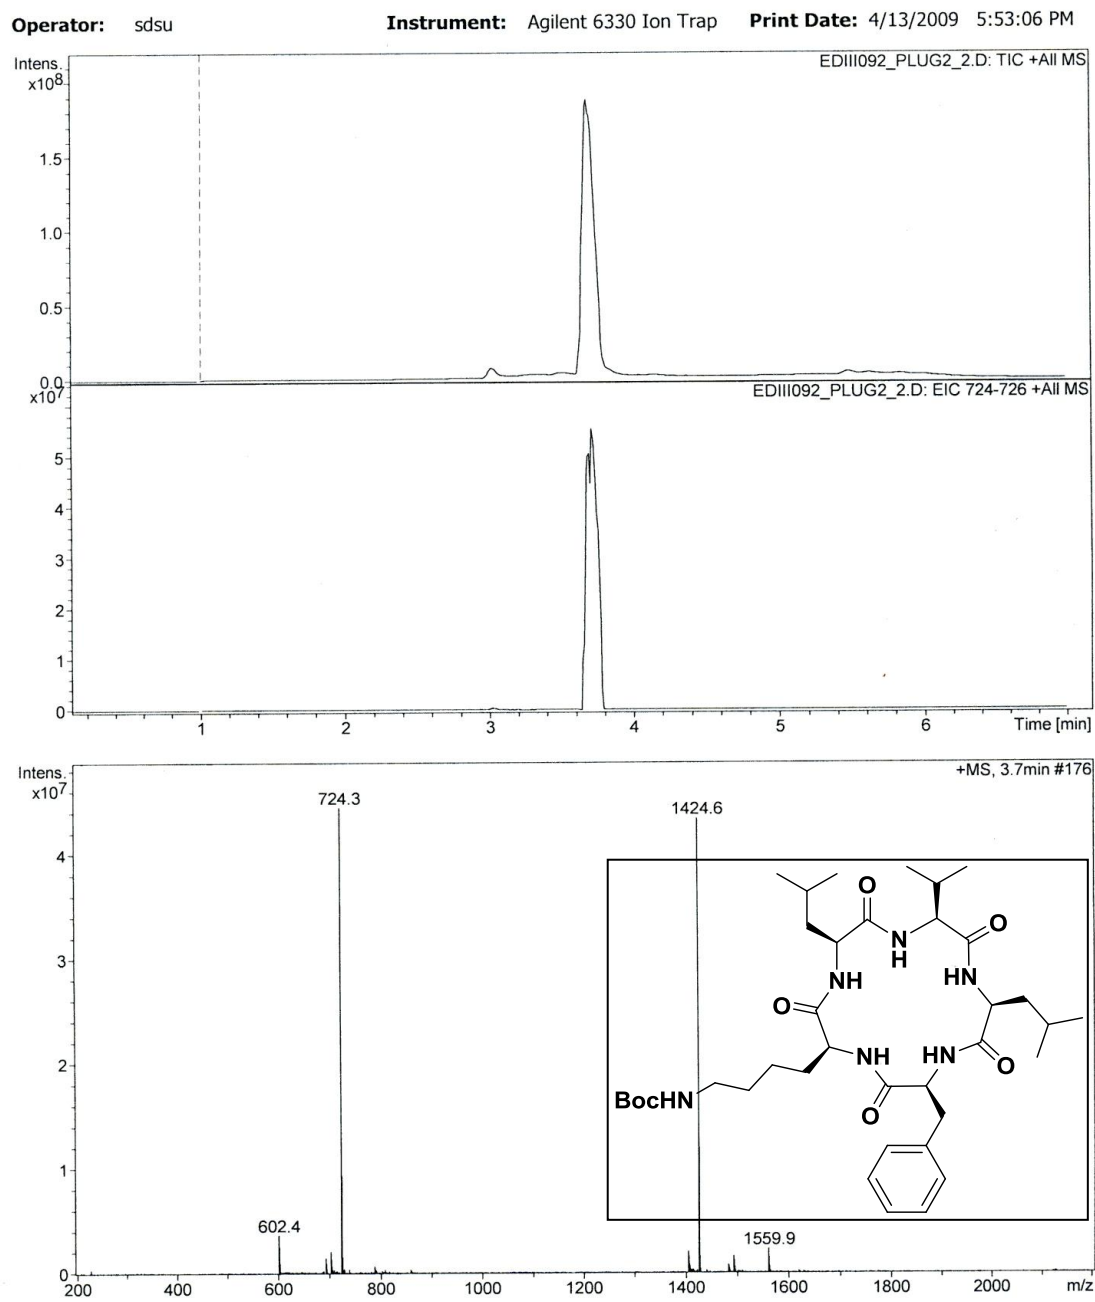

**Compound 31 LCMS Cyclized Pentapeptide Phe-Leu-Val-Leu-Lys(Boc) (MW+Na=724.3)**

## Display Report - All Windows Selected Analysis

**Analysis Name:** ED\_DD\_1\_5TH\_ **Instrument:** Agilent 6330 Ion Trap **Print Date:** 4/22/2009 1:51:45 PM  
**Method:** SANA.M TAG.D **Operator:** sdsu **Acq. Date:** 3/30/2009 1:51:37 PM  
**Sample Name:** ED\_dd\_1\_5th\_tag  
**Analysis Info:**

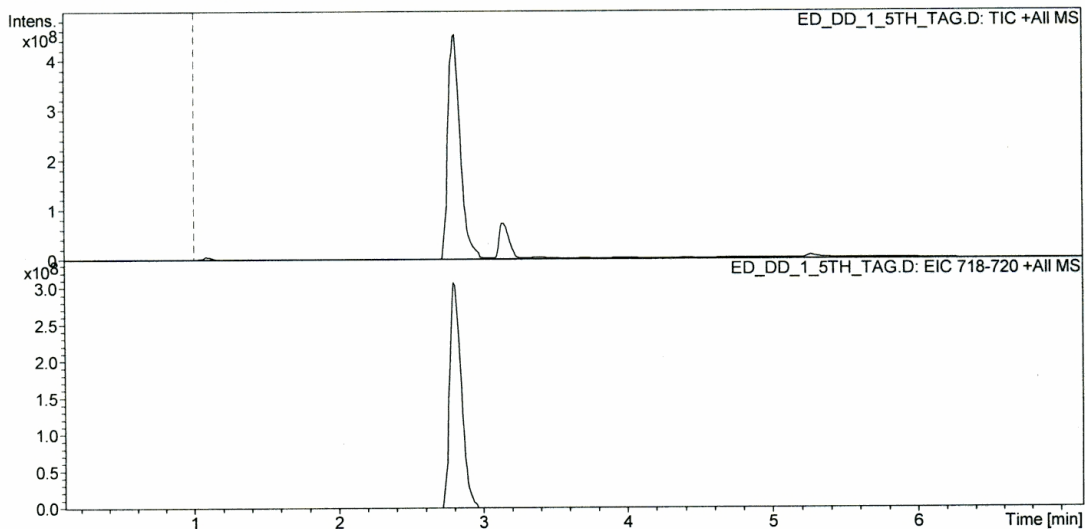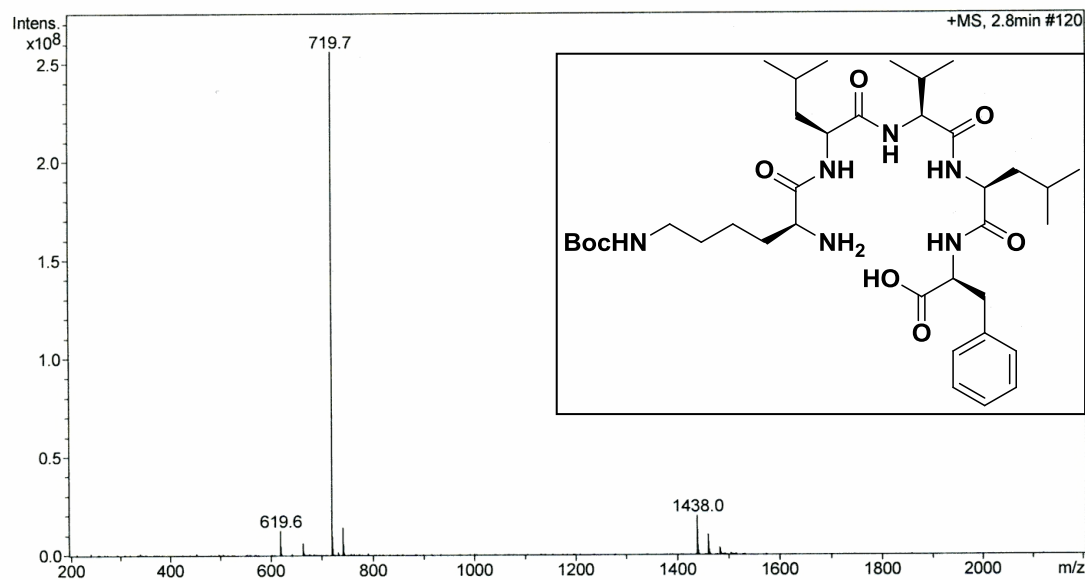

**Compound 32 LCMS Double Deprotected Linear Pentapeptide HO-Phe-Leu-Val-Leu-Lys(Boc)-NH<sub>2</sub> (MW = 719)**

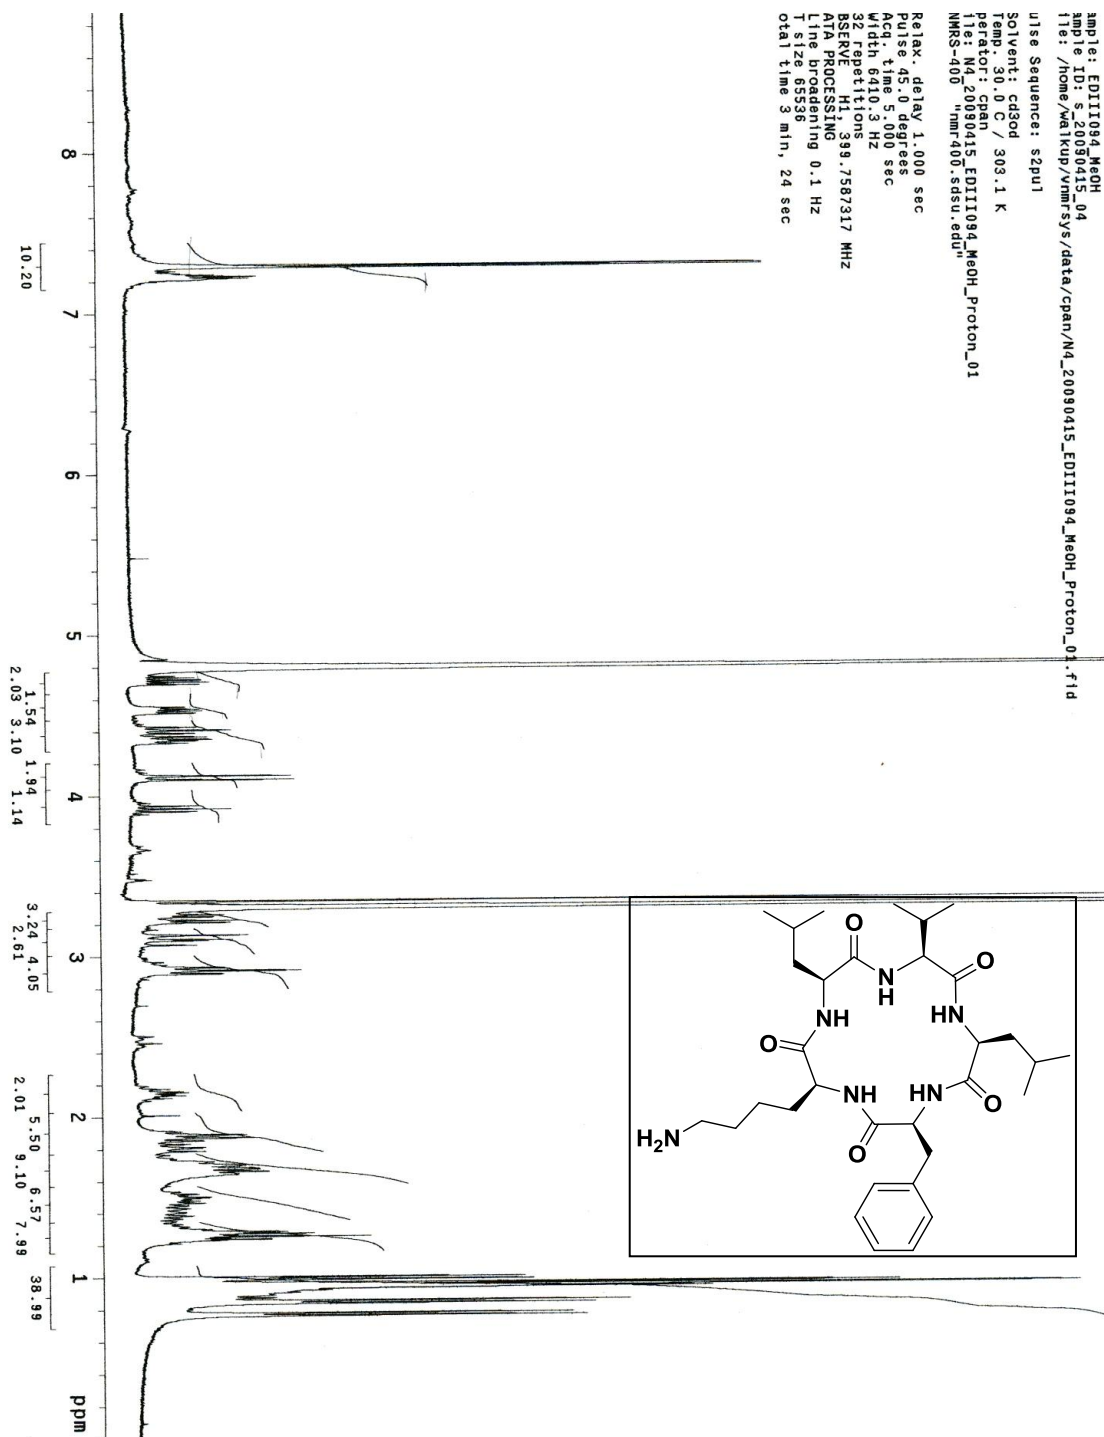

Compound 32 NMR Cyclized Pentapeptide Phe-Leu-Val-Leu-Lys

## Display Report - All Windows All Analyses

Operator: sdsu

Instrument: Agilent 6330 Ion Trap

Print Date: 4/14/2009 7:00:23 PM

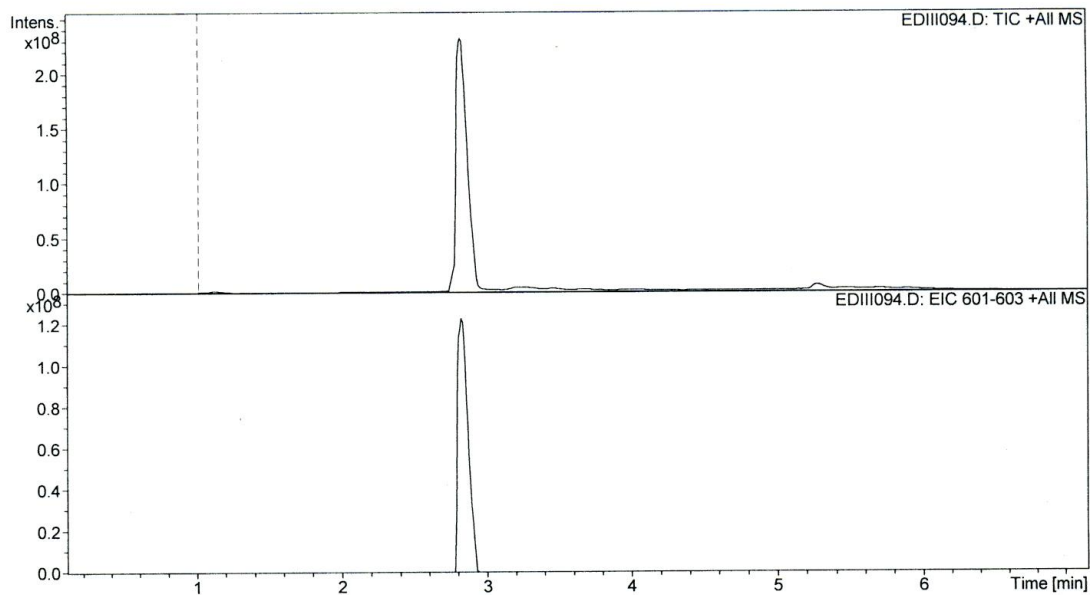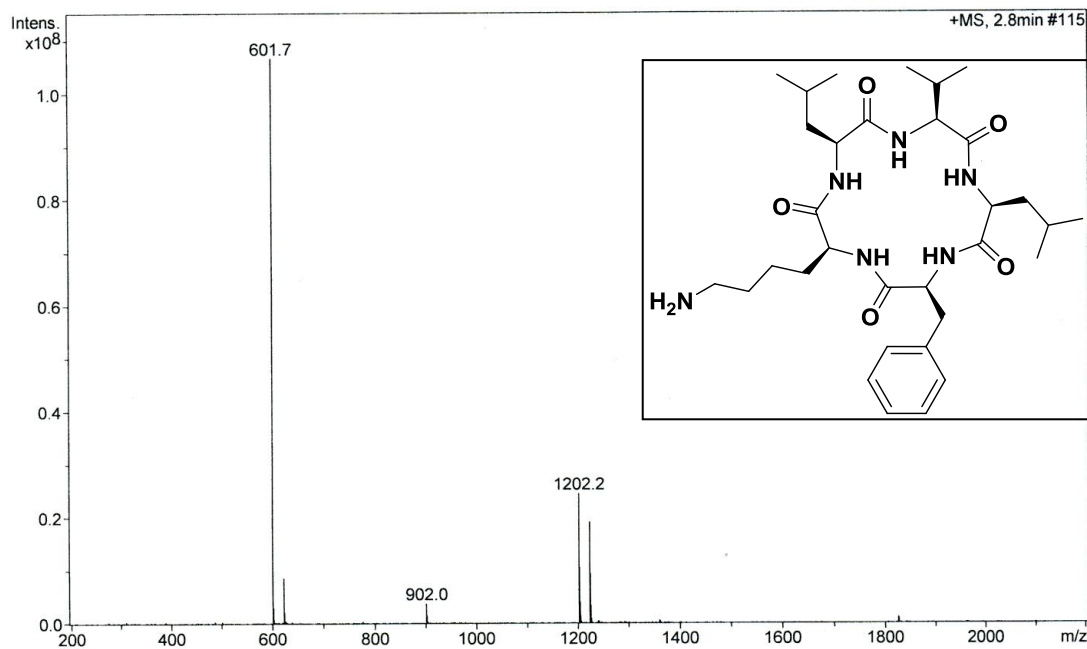

## Compound 32 LCMS Cyclized Pentapeptide Phe-Leu-Val-Leu-Lys (MW=601.7)

## Display Report - All Windows Selected Analysis

**Analysis Name:** VJ256\_155\_DD. **Instrument:** Agilent 6330 Ion Trap **Print Date:** 7/14/2009 1:07:22 PM  
**Method:** SANA.M D **Operator:** sdsu **Acq. Date:** 5/21/2009 2:55:27 PM  
**Sample Name:** VJ256\_155\_DD  
**Analysis Info:**

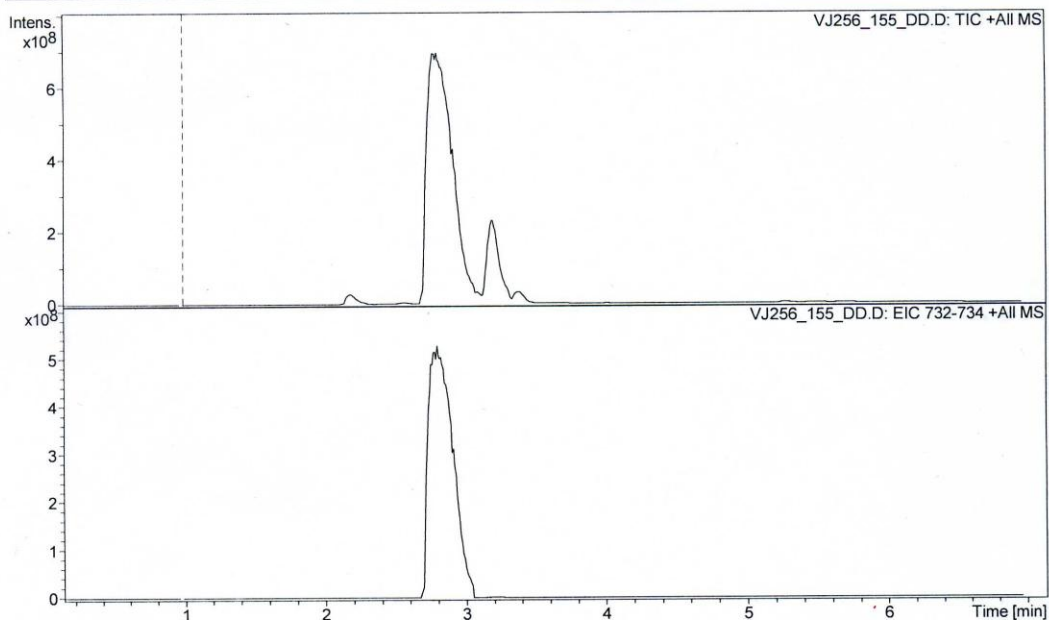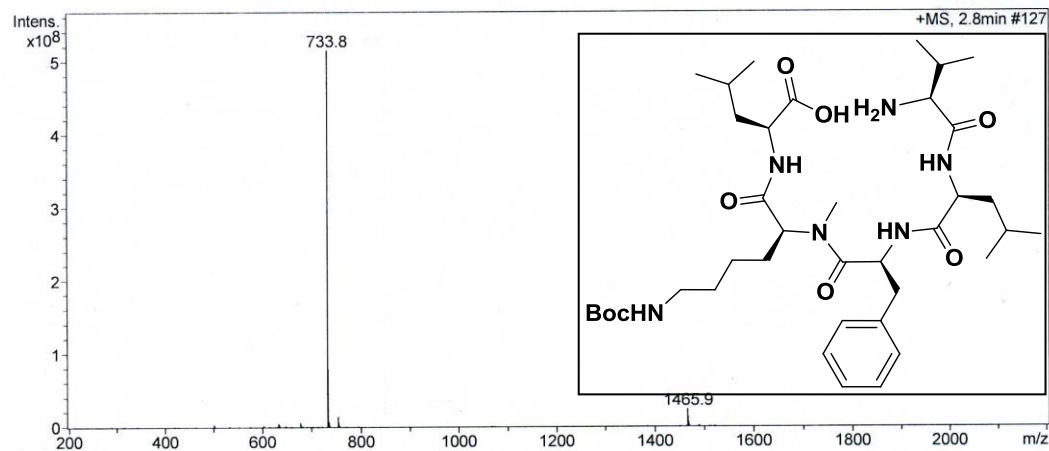

**Compound 34 LCMS Double Deprotected Linear Pentapeptide HO-Leu-N-Me-Lys(Boc)-Phe-Leu-Val-NH<sub>2</sub> (MW = 719)**



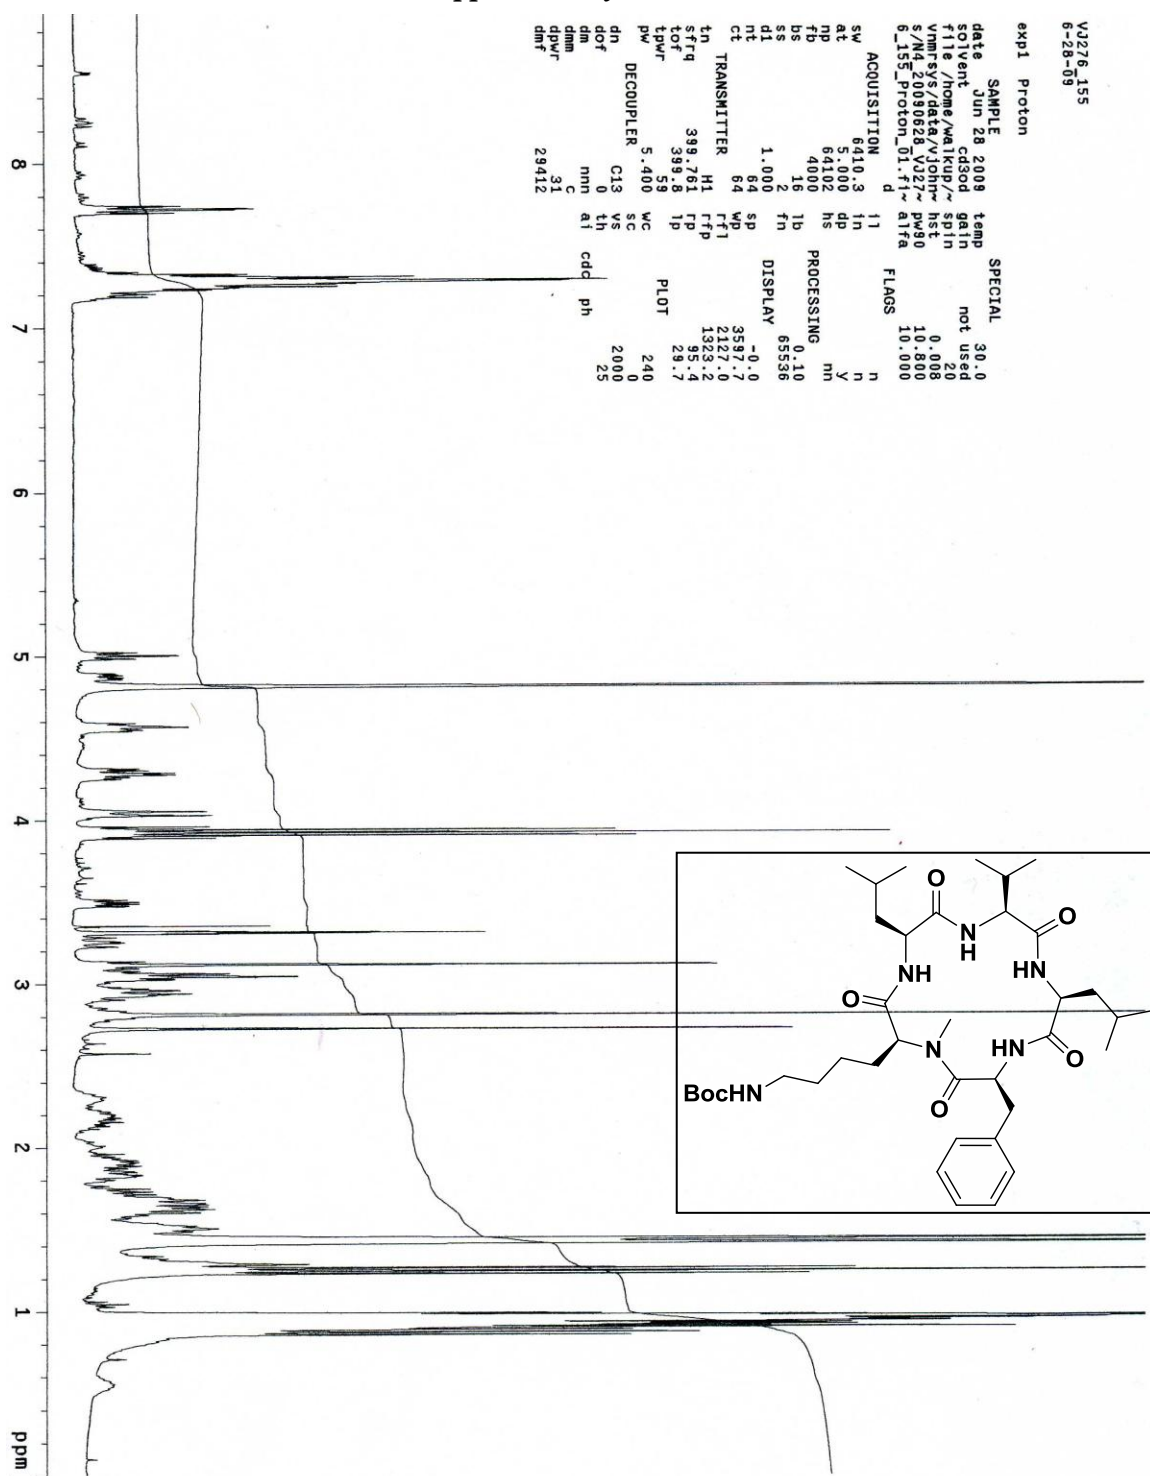

Compound 34 NMR Cyclized Pentapeptide Phe-Leu-Val-Leu-N-Me-Lys(Boc)



## Display Report - All Windows Selected Analysis

**Analysis Name:** VJ276\_155.D    **Instrument:** Agilent 6330 Ion Trap    **Print Date:** 7/14/2009 1:04:45 PM  
**Method:** SANA.M    **Operator:** sdsu    **Acq. Date:** 6/27/2009 5:34:13 PM  
**Sample Name:** VJ276\_155  
**Analysis Info:**

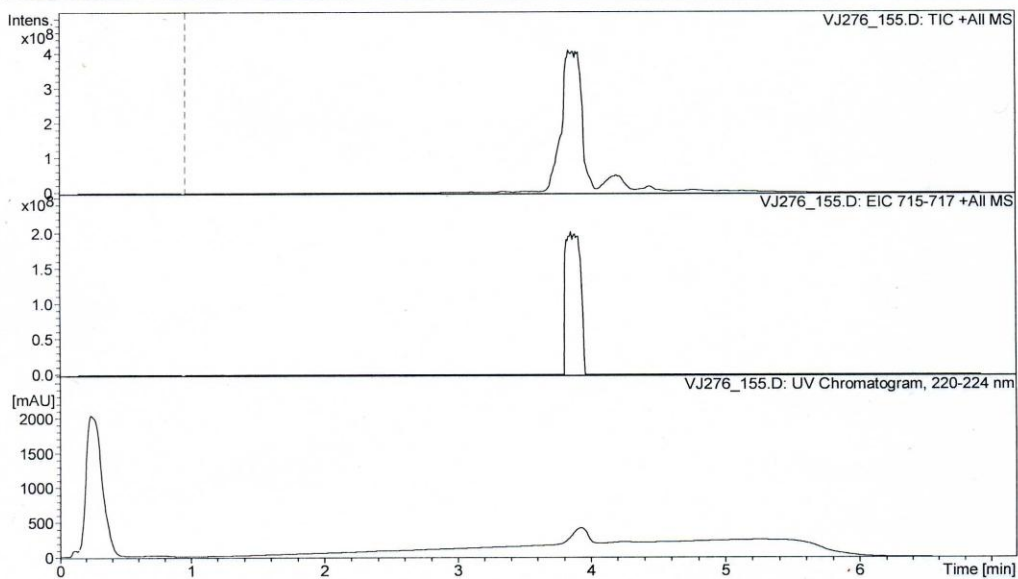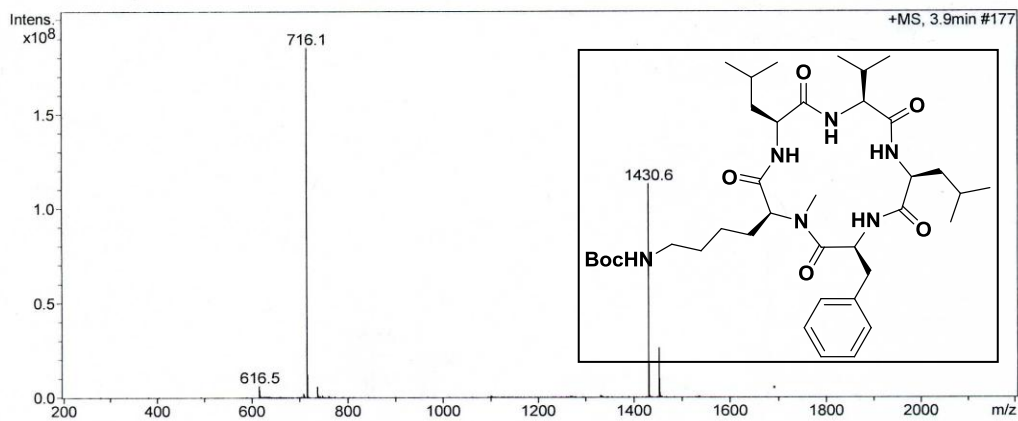

**Compound 34 LCMS Cyclized Pentapeptide Phe-Leu-Val-Leu-N-Me-Lys(Boc) (MW = 715)**

SDSU

Project Name: Defaults  
Reported by User: System

Breeze

## SAMPLE INFORMATION

|              |               |                   |                      |
|--------------|---------------|-------------------|----------------------|
| Sample Name: | VJ276_155     | Acquired By:      | System               |
| Sample Type: | Unknown       | Sample Set Name:  |                      |
| Vial:        | 1             | Acq. Method:      | primary_sanA_ss_ACN  |
| Injection #: | 557           | Date Acquired:    | 6/27/2009 6:15:09 PM |
| Run Time:    | 16.00 Minutes | Injection Volume: | 50.00 ul             |

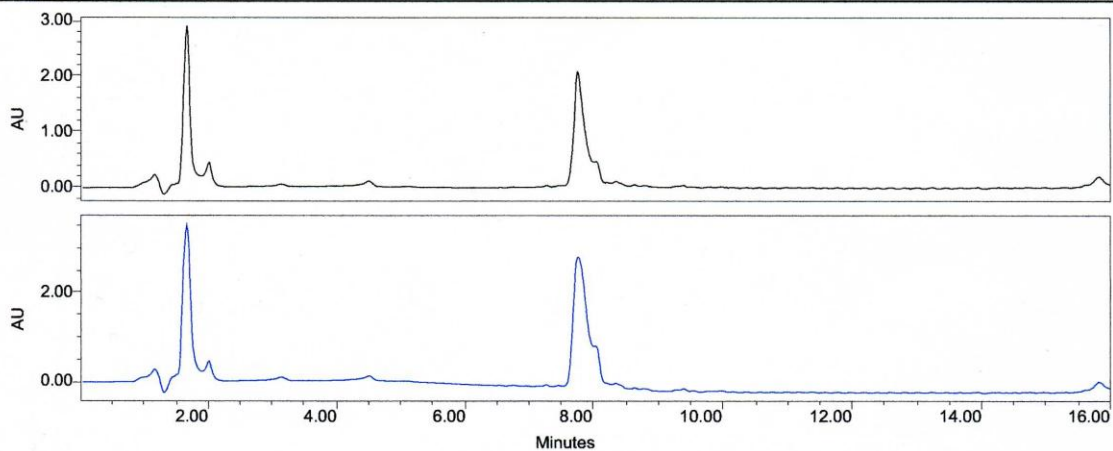

— Channel: 2487Channel 1 Channel Desc.: Processing Method: \*  
 — Channel: 2487Channel 2 Channel Desc.: Processing Method: \*

| Peak Name | RT (min) | Area (V*sec) | % Area | Height (V) | Amount | Units |
|-----------|----------|--------------|--------|------------|--------|-------|
| 1         | ****     | ****         | ****   | ****       | ****   | ****  |
| 2         | ****     | ****         | ****   | ****       | ****   | ****  |

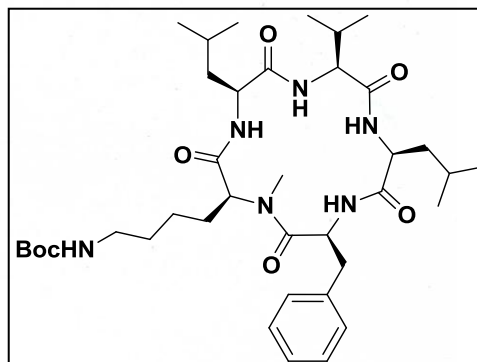

## Compound 34 HPLC Cyclized Pentapeptide Phe-Leu-Val-Leu-N-Me-Lys(Boc)

## Display Report - All Windows Selected Analysis

**Analysis Name:** VJ256\_155\_DD. **Instrument:** Agilent 6330 Ion Trap **Print Date:** 7/14/2009 1:07:22 PM  
**Method:** SANA.M D **Operator:** sdsu **Acq. Date:** 5/21/2009 2:55:27 PM  
**Sample Name:** VJ256\_155\_DD  
**Analysis Info:**

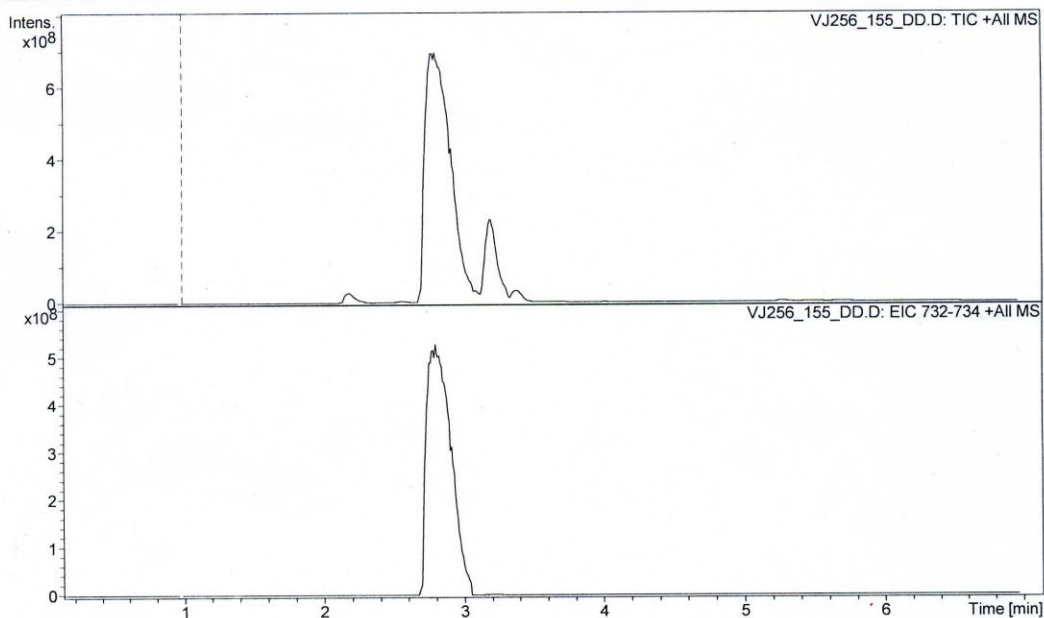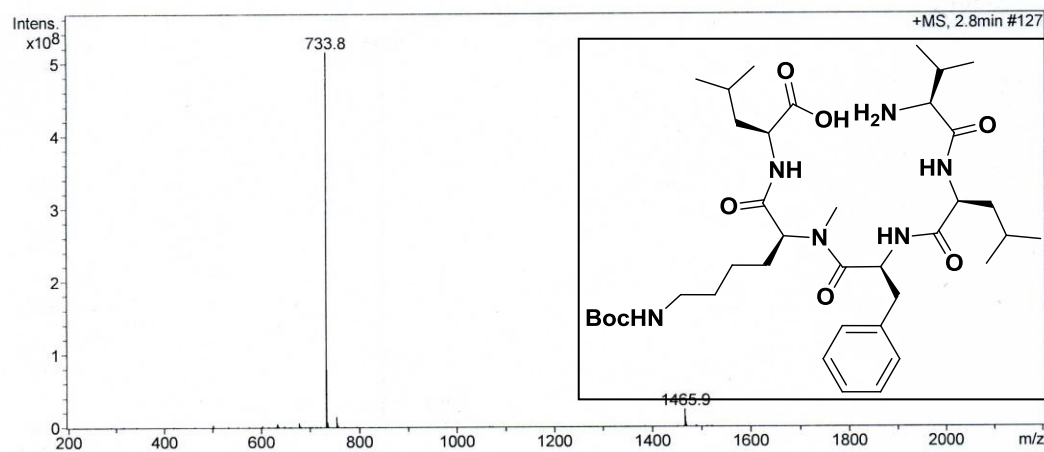

**Compound 35 LCMS Double Deprotected Linear Pentapeptide HO-Leu-N-Me-Lys(Boc)-Phe-Leu-Val-NH<sub>2</sub> (MW = 719)**

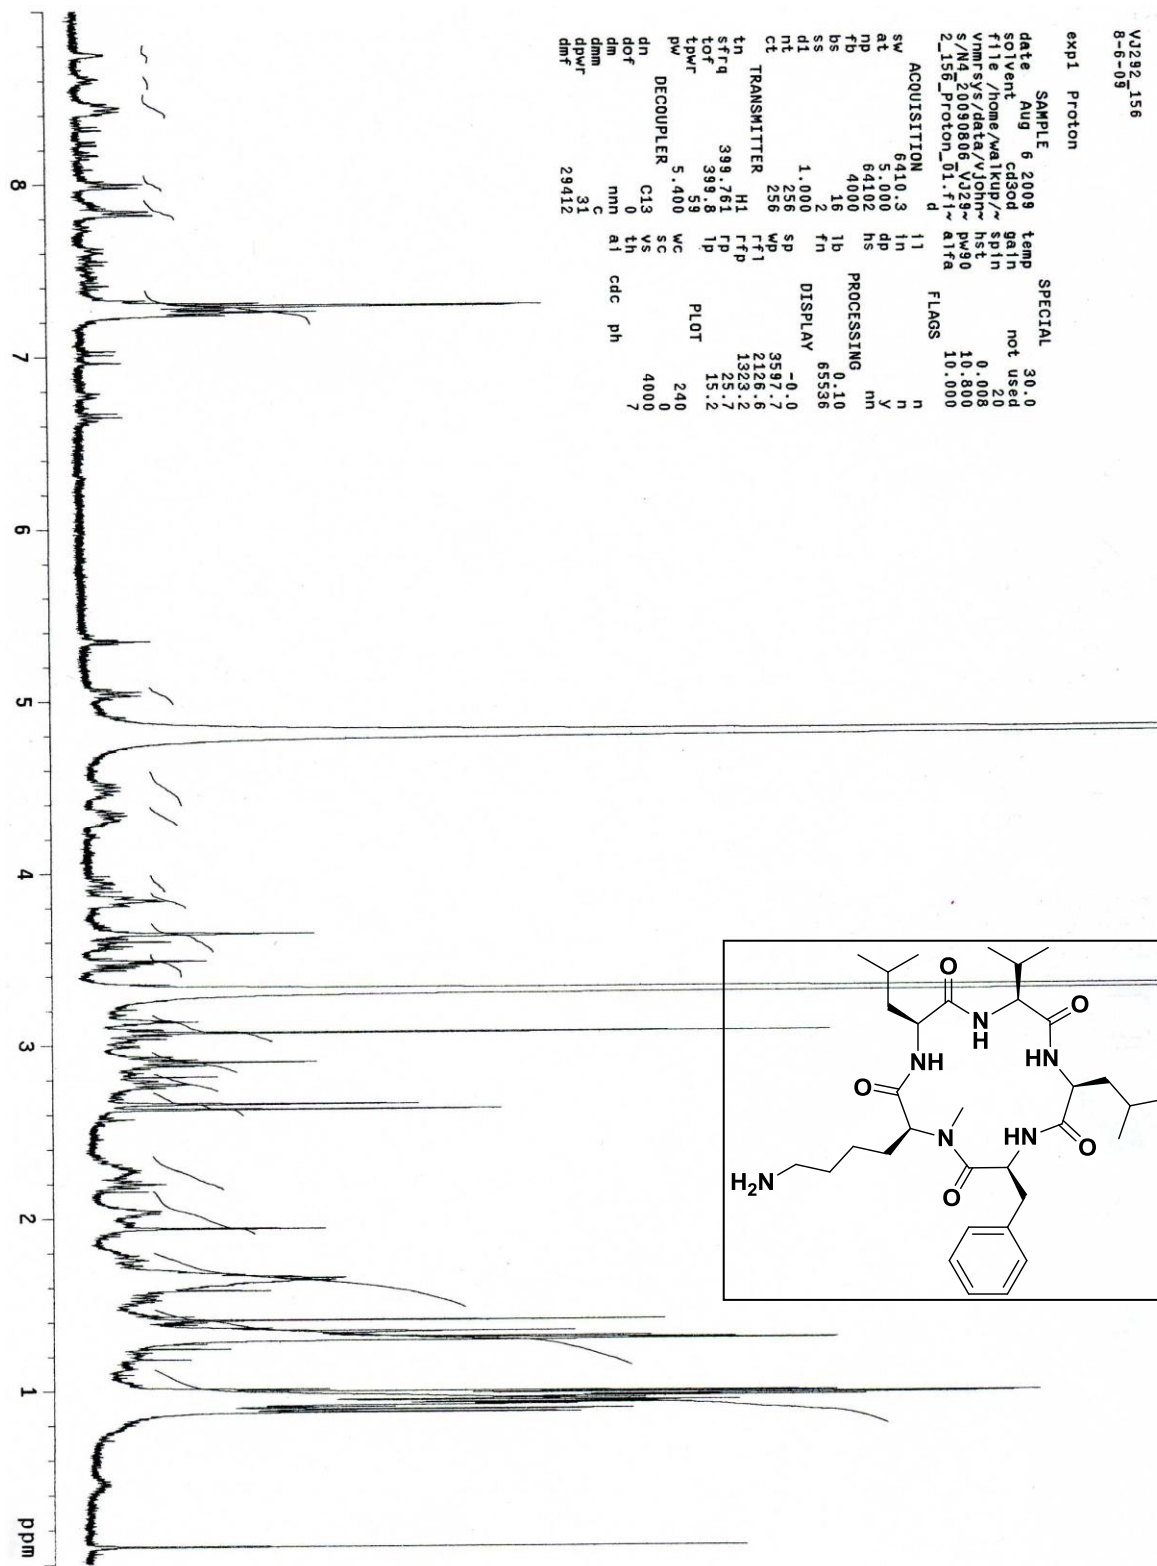

Compound 35 NMR Cyclized Pentapeptide Phe-Leu-Val-Leu-N-Me-Lys

## Display Report - All Windows Selected Analysis

**Analysis Name:** VJ292\_156.D    **Instrument:** Agilent 6330 Ion Trap    **Print Date:** 8/5/2009 8:40:02 PM  
**Method:** SANA.M    **Operator:** sdsu    **Acq. Date:** 8/5/2009 8:32:41 PM  
**Sample Name:** VJ292\_156  
**Analysis Info:**

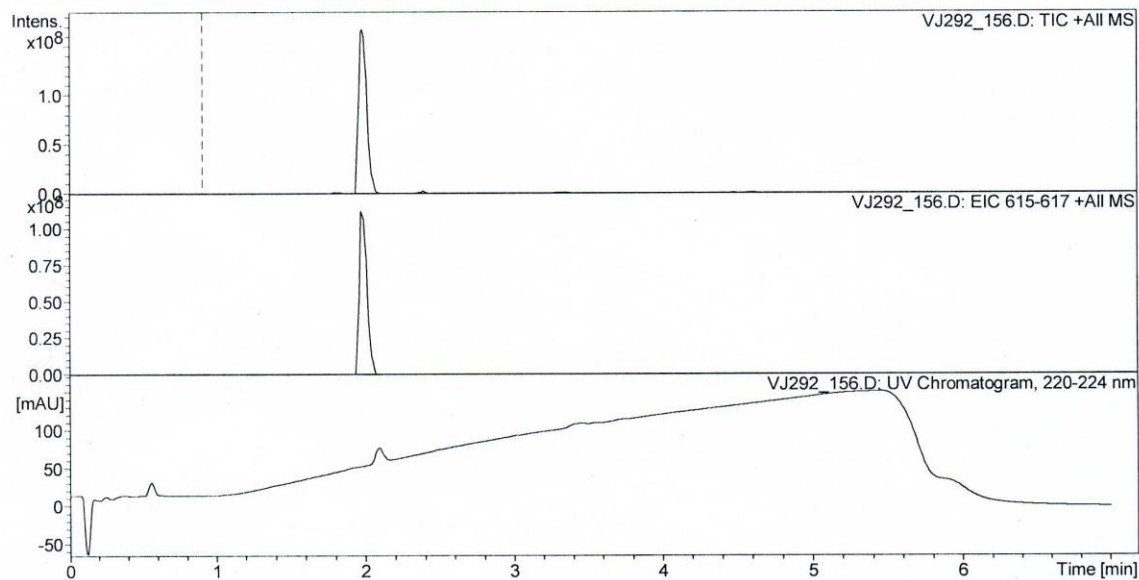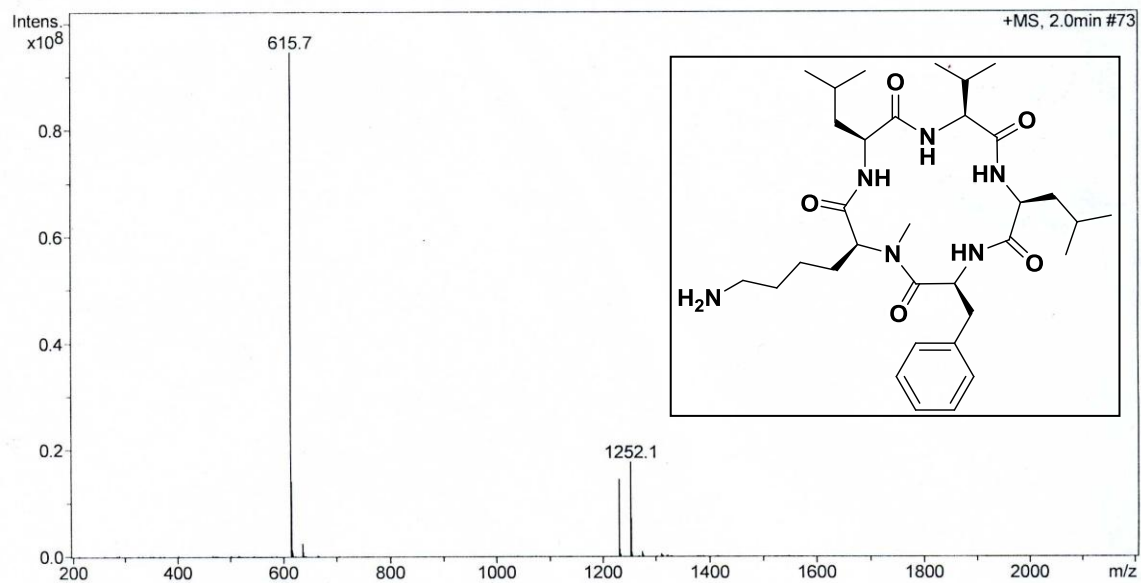

**Compound 35 LCMS Cyclized Pentapeptide Phe-Leu-Val-Leu-N-Me-Lys (MW = 615)**



SDSU

Project Name: Defaults  
Reported by User: System

Breeze

## SAMPLE INFORMATION

|              |               |                   |                     |
|--------------|---------------|-------------------|---------------------|
| Sample Name: | VJ292_156     | Acquired By:      | System              |
| Sample Type: | Unknown       | Sample Set Name:  |                     |
| Vial:        | 1             | Acq. Method:      | primary_sanA_ss_ACN |
| Injection #: | 207           | Date Acquired:    | 8/5/2009 7:59:53 PM |
| Run Time:    | 16.00 Minutes | Injection Volume: | 50.00 ul            |

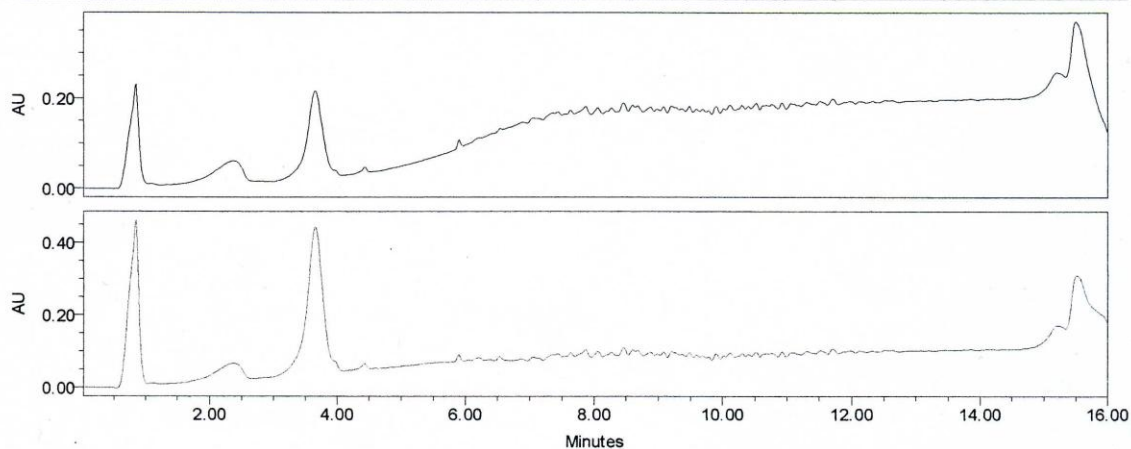

— Channel: 2487Channel 1 Channel Desc.: Processing Method: \*\*\*\*  
 — Channel: 2487Channel 2 Channel Desc.: Processing Method: \*\*\*\*

| Peak Name | RT (min) | Area (μV*sec) | % Area | Height (μV) | Amount | Units |
|-----------|----------|---------------|--------|-------------|--------|-------|
| 1         | ****     | ****          | ****   | ****        | ****   | ****  |
| 2         | ****     | ****          | ****   | ****        | ****   | ****  |

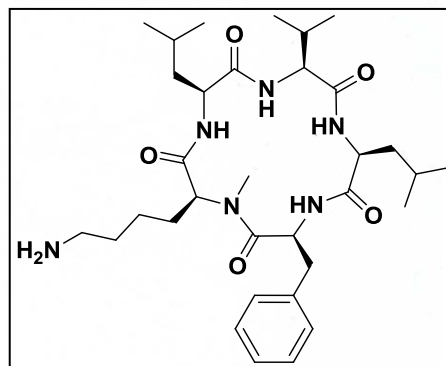

## Compound 35 HPLC Cyclized Pentapeptide Phe-Leu-Val-Leu-N-Me-Lys

## Display Report - All Windows Selected Analysis

**Analysis Name:** CCL\_COMPD158 **Instrument:** Agilent 6330 Ion Trap **Print Date:** 4/22/2009 3:22:36 PM  
**Method:** SANA.M LP.D **Operator:** sdsu **Acq. Date:** 4/21/2009 5:10:51 PM  
**Sample Name:** CCL\_comp158LP  
**Analysis Info:**

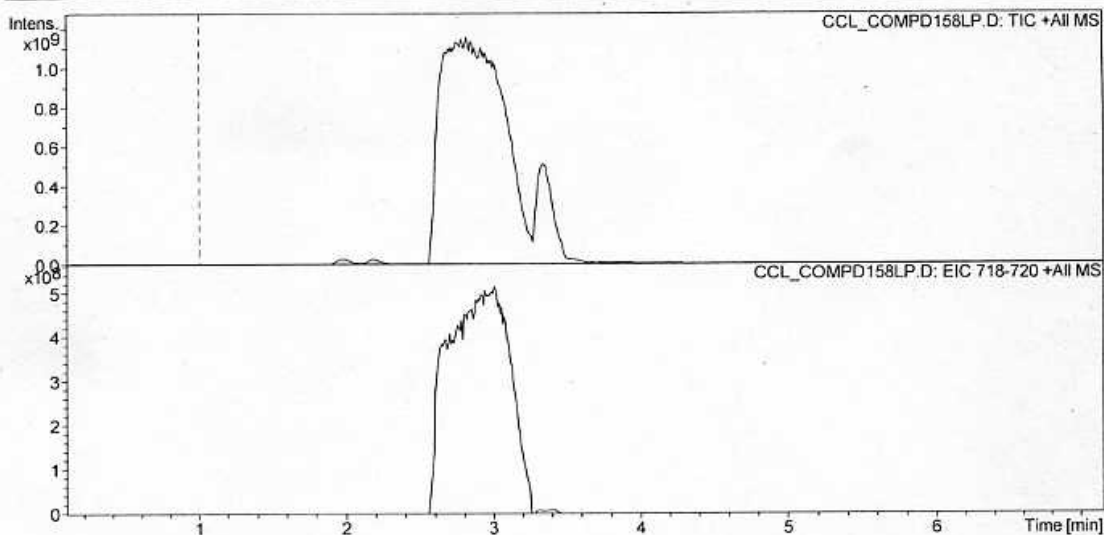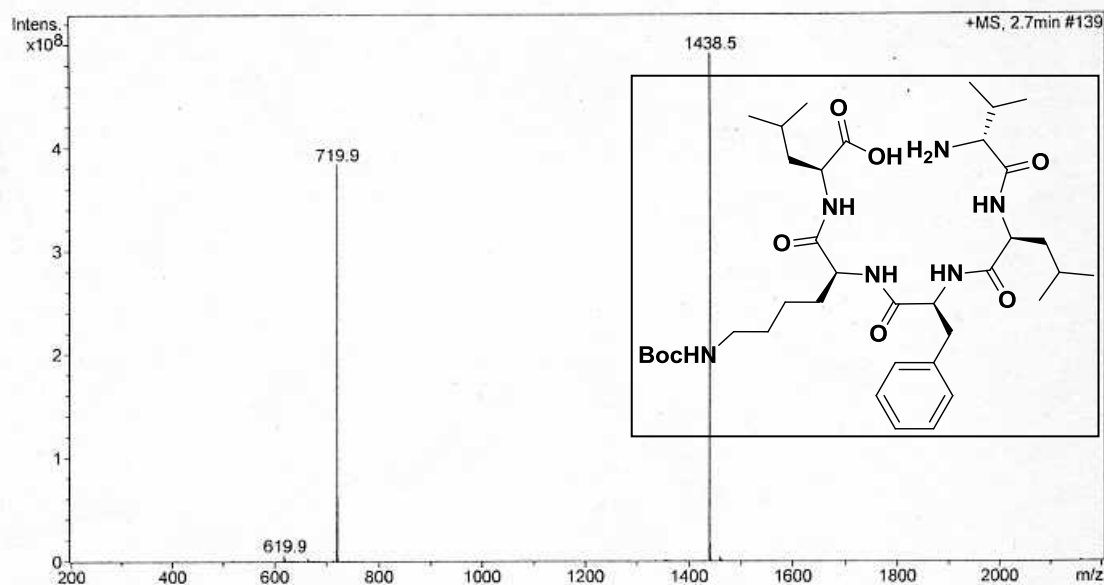

**Compound 36 LCMS Double Deprotected Linear Pentapeptide HO-Leu-Lys(Boc)-Phe-Leu-D-Val-NH<sub>2</sub> (MW = 719)**

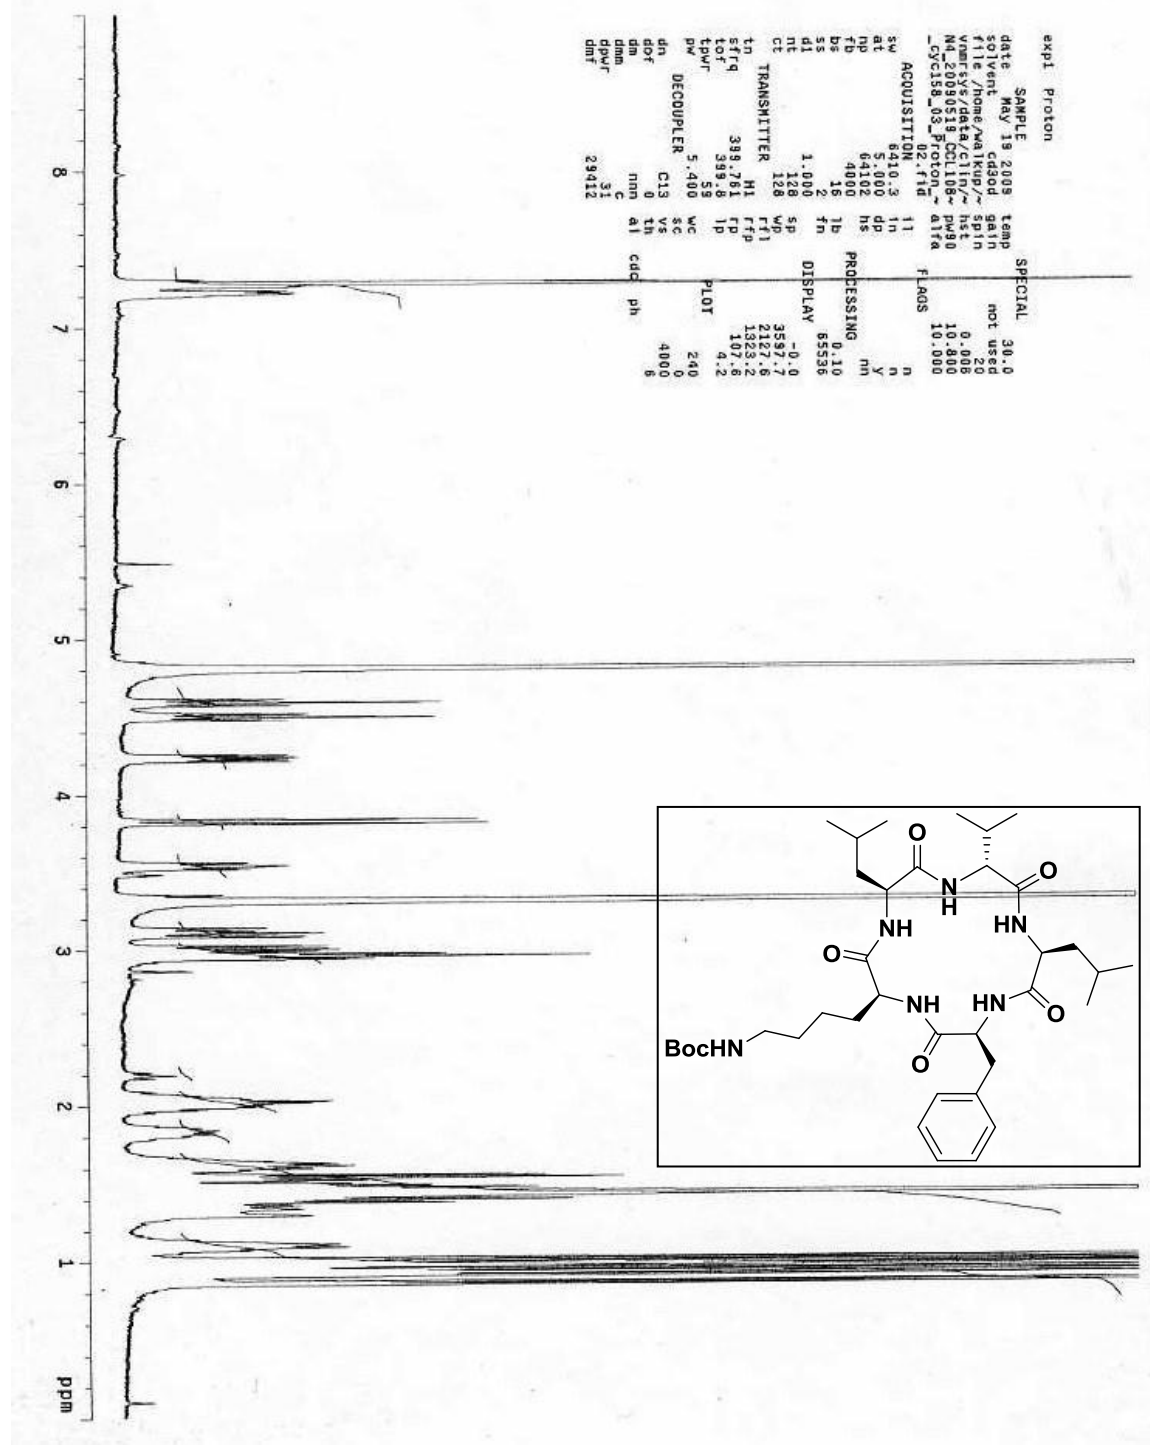

Compound 36 NMR Cyclized Pentapeptide Phe-Leu-D-Val-Leu-Lys(Boc)



## Display Report - All Windows Selected Analysis

**Analysis Name:** CCL108\_CYC158 **Instrument:** Agilent 6330 Ion Trap **Print Date:** 5/19/2009 5:53:37 PM  
**Method:** SANA.M CRASH.D **Operator:** sdsu **Acq. Date:** 5/12/2009 6:04:22 PM  
**Sample Name:** CCL108\_cyc158crash  
**Analysis Info:**

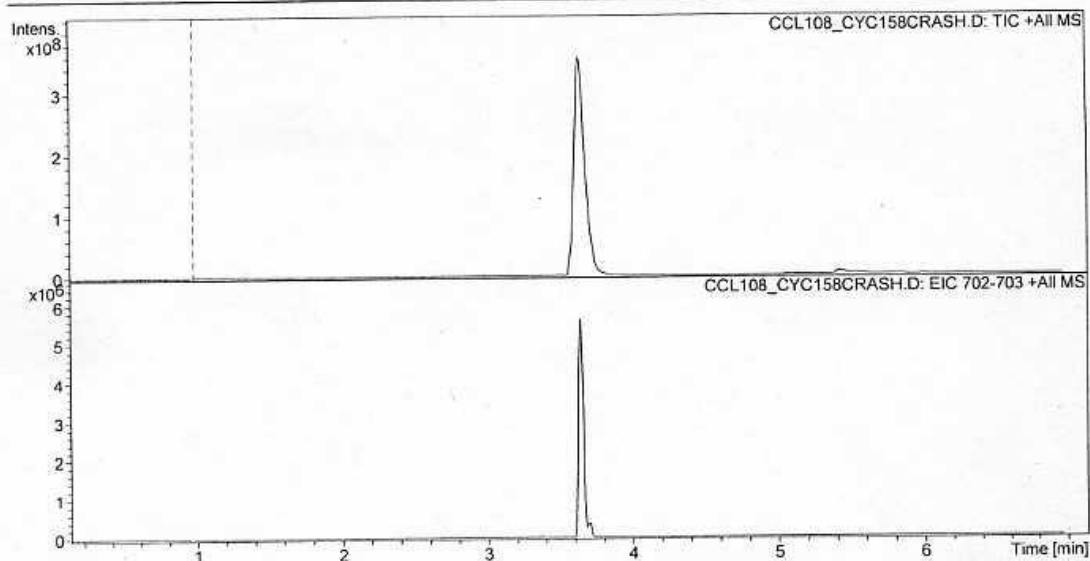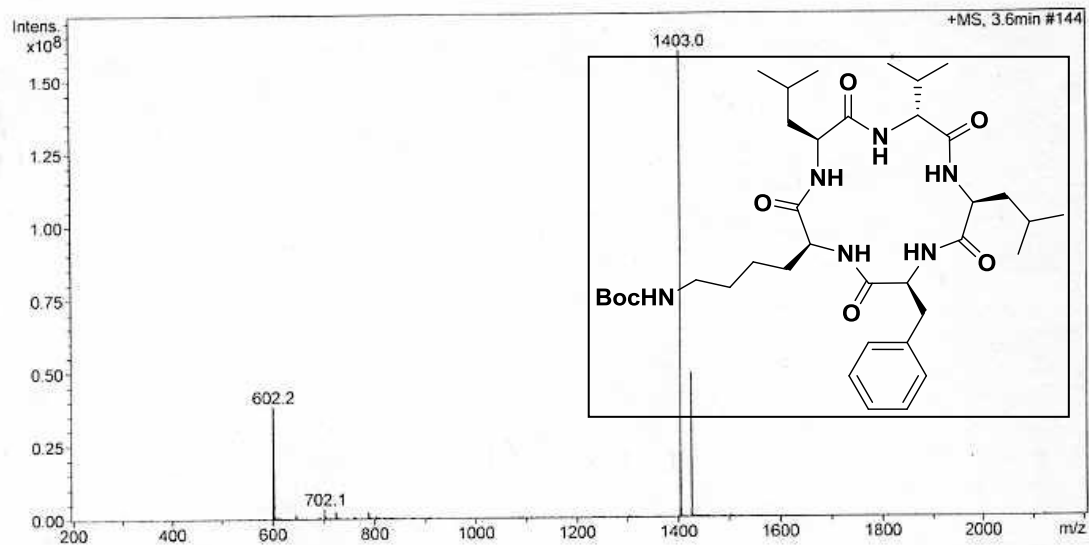

**Compound 36 LCMS Cyclized Pentapeptide Phe-Leu-D-Val-Leu-Lys(Boc) (MW = 702)**

SDSU

Project Name: Defaults  
Reported by User: System

Breeze

## SAMPLE INFORMATION

|              |                  |                   |                      |
|--------------|------------------|-------------------|----------------------|
| Sample Name: | CCL108_cyc158_01 | Acquired By:      | System               |
| Sample Type: | Unknown          | Sample Set Name:  |                      |
| Vial:        | 1                | Acq. Method:      | primary_sanA_ss      |
| Injection #: | 228              | Date Acquired:    | 5/18/2009 2:36:27 PM |
| Run Time:    | 16.00 Minutes    | Injection Volume: | 50.00 ul             |

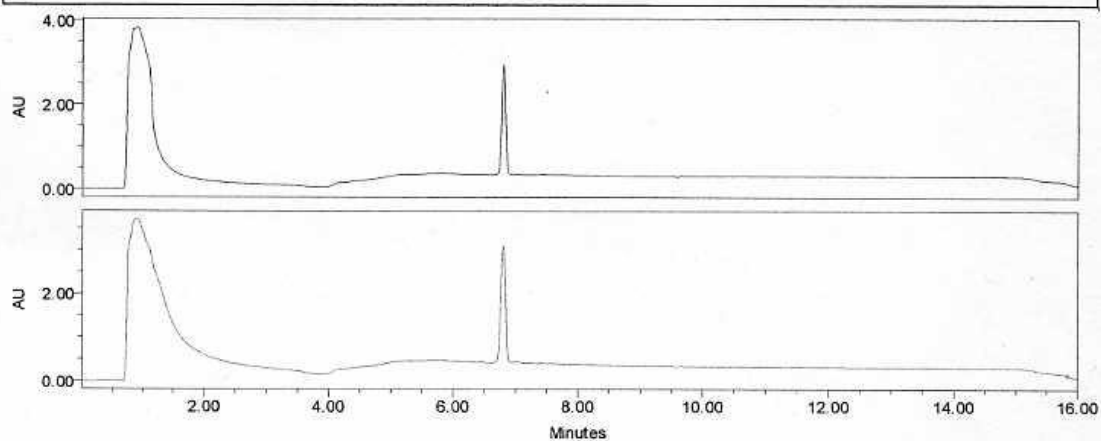

— Channel: 2487Channel 1 Channel Desc.: Processing Method: \*\*\*\*  
 — Channel: 2487Channel 2 Channel Desc.: Processing Method: \*\*\*\*

| Peak Name | RT (min) | Area (μV*sec) | % Area | Height (μV) | Amount | Units |
|-----------|----------|---------------|--------|-------------|--------|-------|
| 1 ****    | ****     | ****          | ****   | ****        | ****   | ****  |
| 2 ****    | ****     | ****          | ****   | ****        | ****   | ****  |

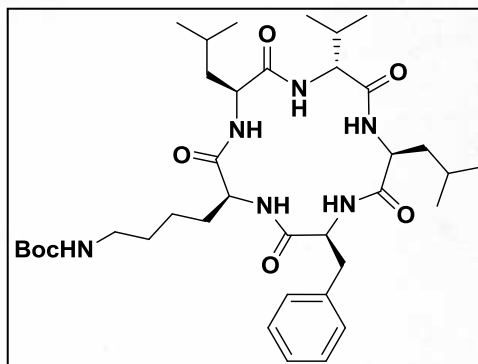

## Compound 36 HPLC Cyclized Pentapeptide Phe-Leu-D-Val-Leu-Lys(Boc)

## Display Report - All Windows Selected Analysis

Analysis Name: CCL\_COMPD158 Instrument: Agilent 6330 Ion Trap Print Date: 4/22/2009 3:22:36 PM  
Method: SANA.M LP.D Operator: sdsu Acq. Date: 4/21/2009 5:10:51 PM  
Sample Name: CCL\_comp158LP  
Analysis Info:

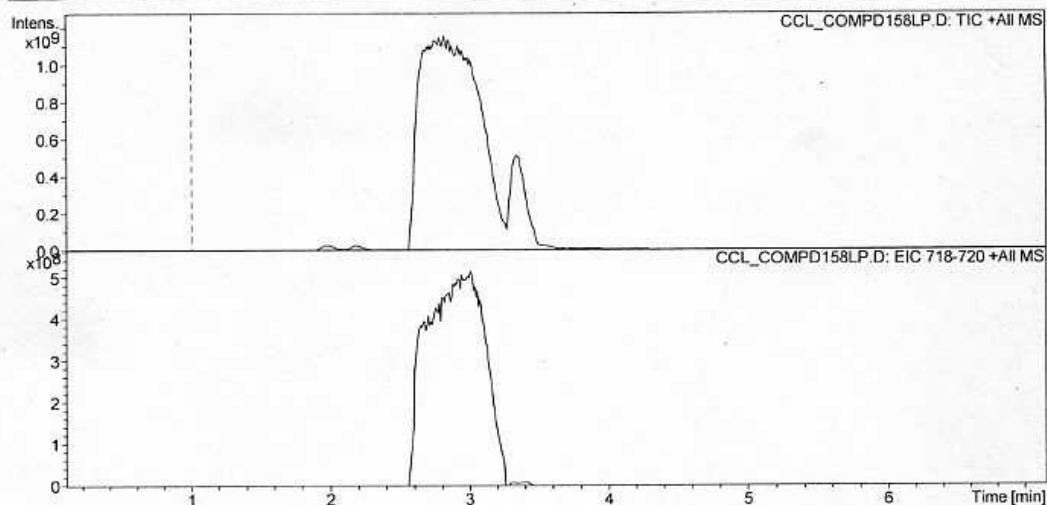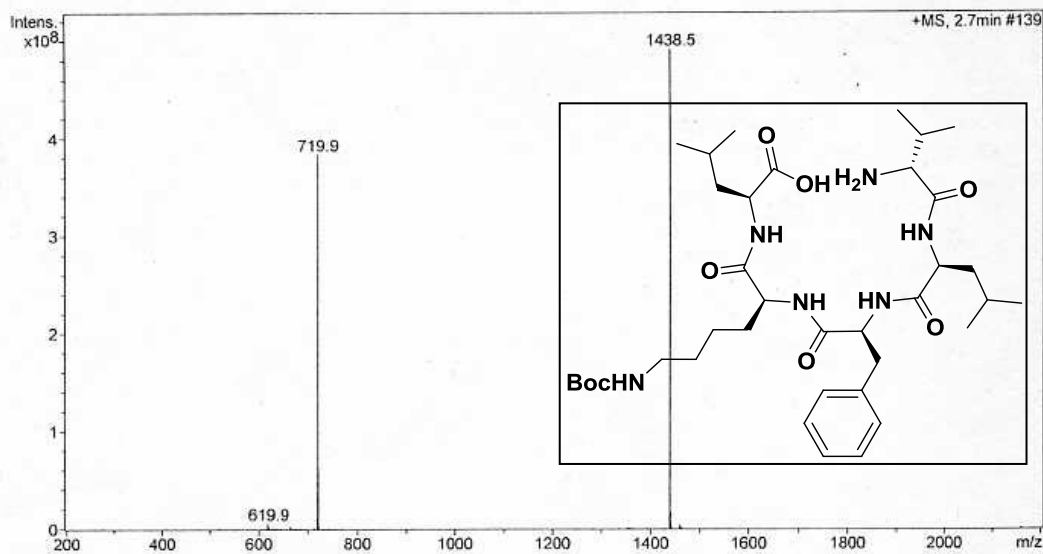

**Compound 37 LCMS Double Deprotected Linear Pentapeptide HO-Leu-Lys(Boc)-Phe-Leu-D-Val-NH<sub>2</sub> (MW = 719)**

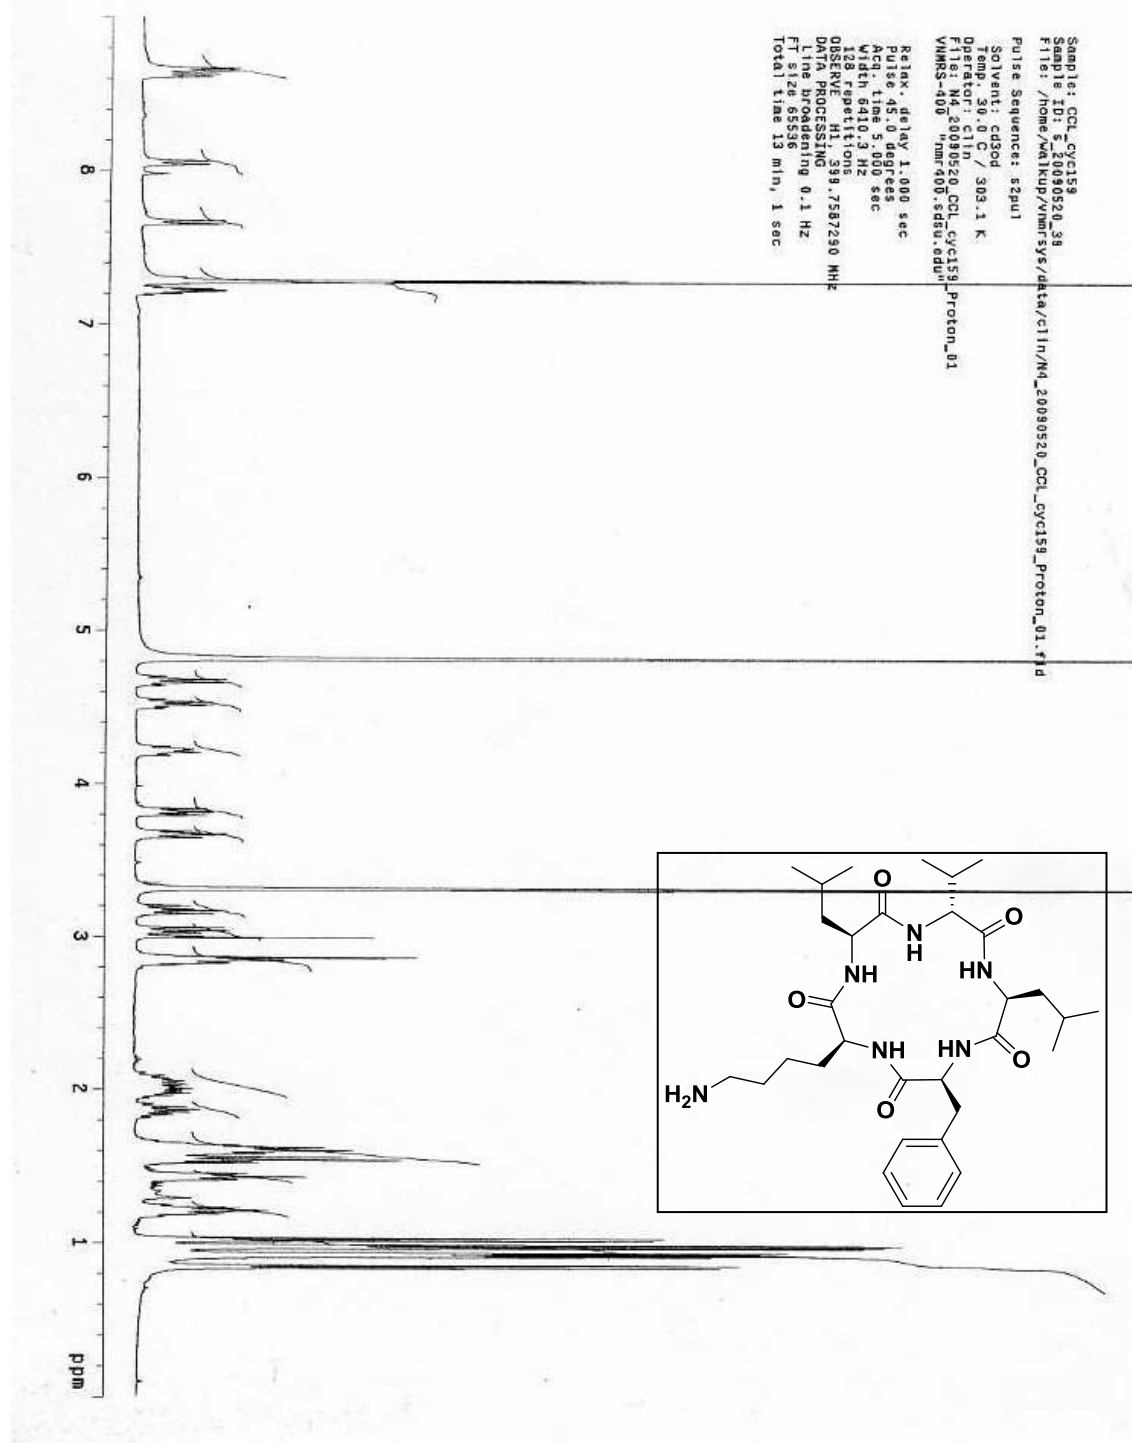

Compound 37 NMR Cyclized Pentapeptide Phe-Leu-D-Val-Leu-Lys

## Display Report - All Windows Selected Analysis

**Analysis Name:** CCL\_CYC159.D **Instrument:** Agilent 6330 Ion Trap **Print Date:** 5/19/2009 9:41:42 PM  
**Method:** SANA.M **Operator:** sdsu **Acq. Date:** 5/19/2009 9:31:35 PM  
**Sample Name:** CCL\_cyc159  
**Analysis Info:**

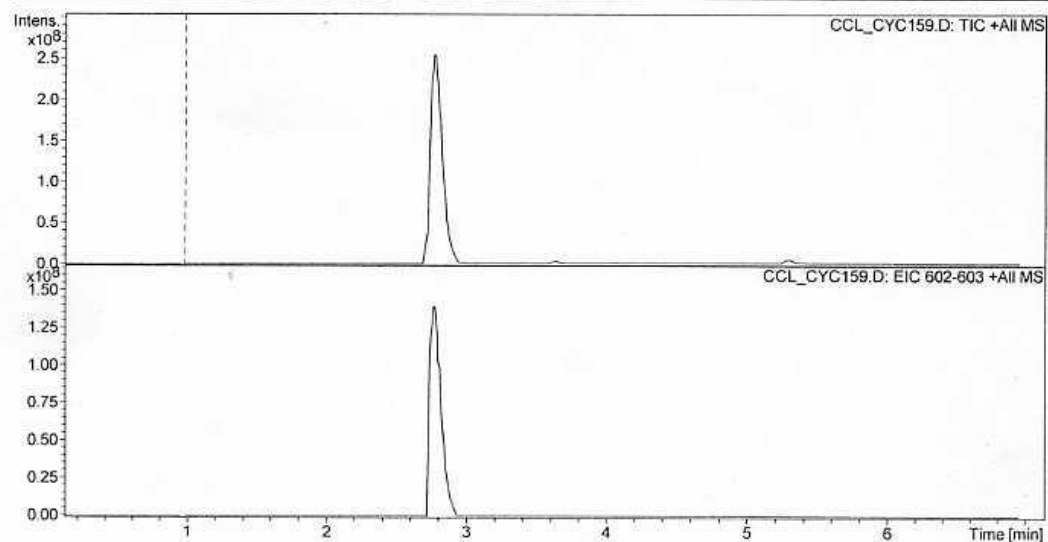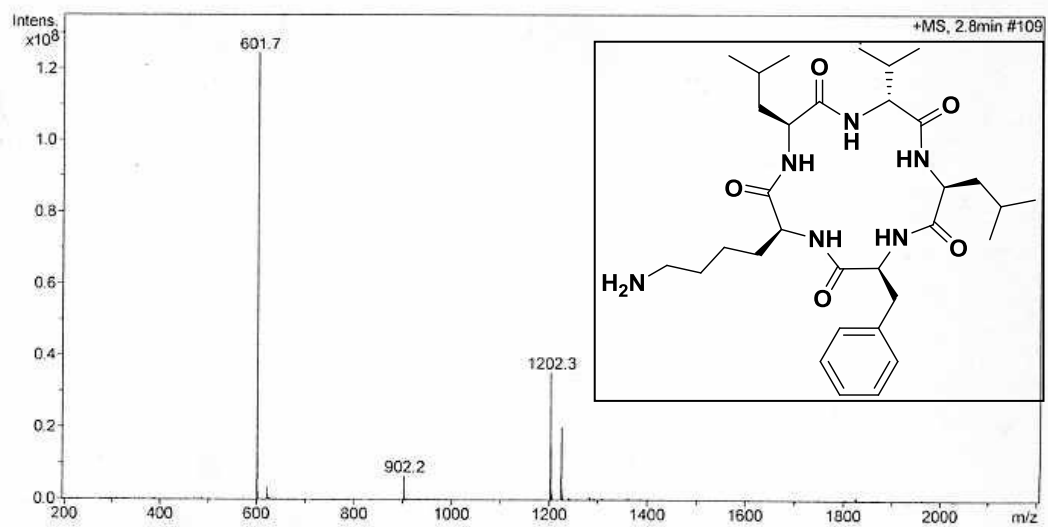

**Compound 37 LCMS Cyclized Pentapeptide Phe-Leu-D-Val-Leu-Lys (MW = 602)**

SDSU

Project Name: Defaults  
Reported by User: System

Breeze

## SAMPLE INFORMATION

|              |                  |                   |                       |
|--------------|------------------|-------------------|-----------------------|
| Sample Name: | CCL112_cyc159_02 | Acquired By:      | System                |
| Sample Type: | Unknown          | Sample Set Name:  |                       |
| Vial:        | 1                | Acq. Method:      | primary_sanA_ss       |
| Injection #: | 247              | Date Acquired:    | 5/19/2009 10:12:07 PM |
| Run Time:    | 16.00 Minutes    | Injection Volume: | 50.00 ul              |

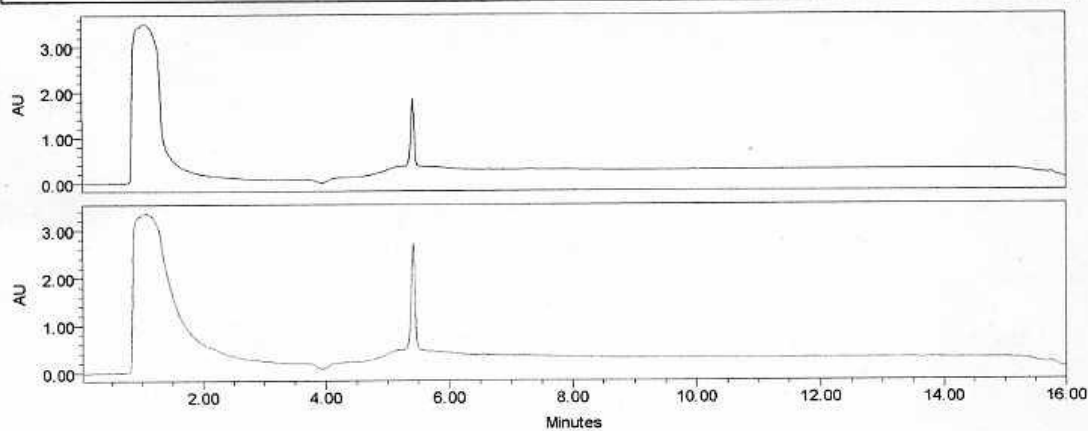

— Channel: 2487Channel 1 Channel Desc.: Processing Method: \*\*\*\*  
 — Channel: 2487Channel 2 Channel Desc.: Processing Method: \*\*\*\*

| Peak Name | RT (min) | Area (μV*sec) | % Area | Height (μV) | Amount | Units |
|-----------|----------|---------------|--------|-------------|--------|-------|
| 1 ****    | ****     | ****          | ****   | ****        | ****   | ****  |
| 2 ****    | ****     | ****          | ****   | ****        | ****   | ****  |

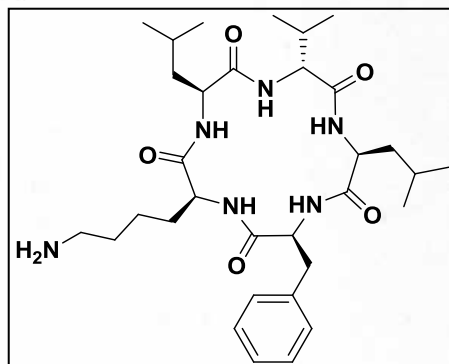

## Compound 37 HPLC Cyclized Pentapeptide Phe-Leu-D-Val-Leu-Lys

## Display Report - All Windows Selected Analysis

**Analysis Name:** JS\_182\_LINCRU **Instrument:** Agilent 6330 Ion Trap **Print Date:** 6/25/2009 9:20:24 AM  
**Method:** SANA.M D.D **Operator:** sdsu **Acq. Date:** 6/24/2009 7:02:04 PM  
**Sample Name:** JS\_182\_lincrud  
**Analysis Info:**

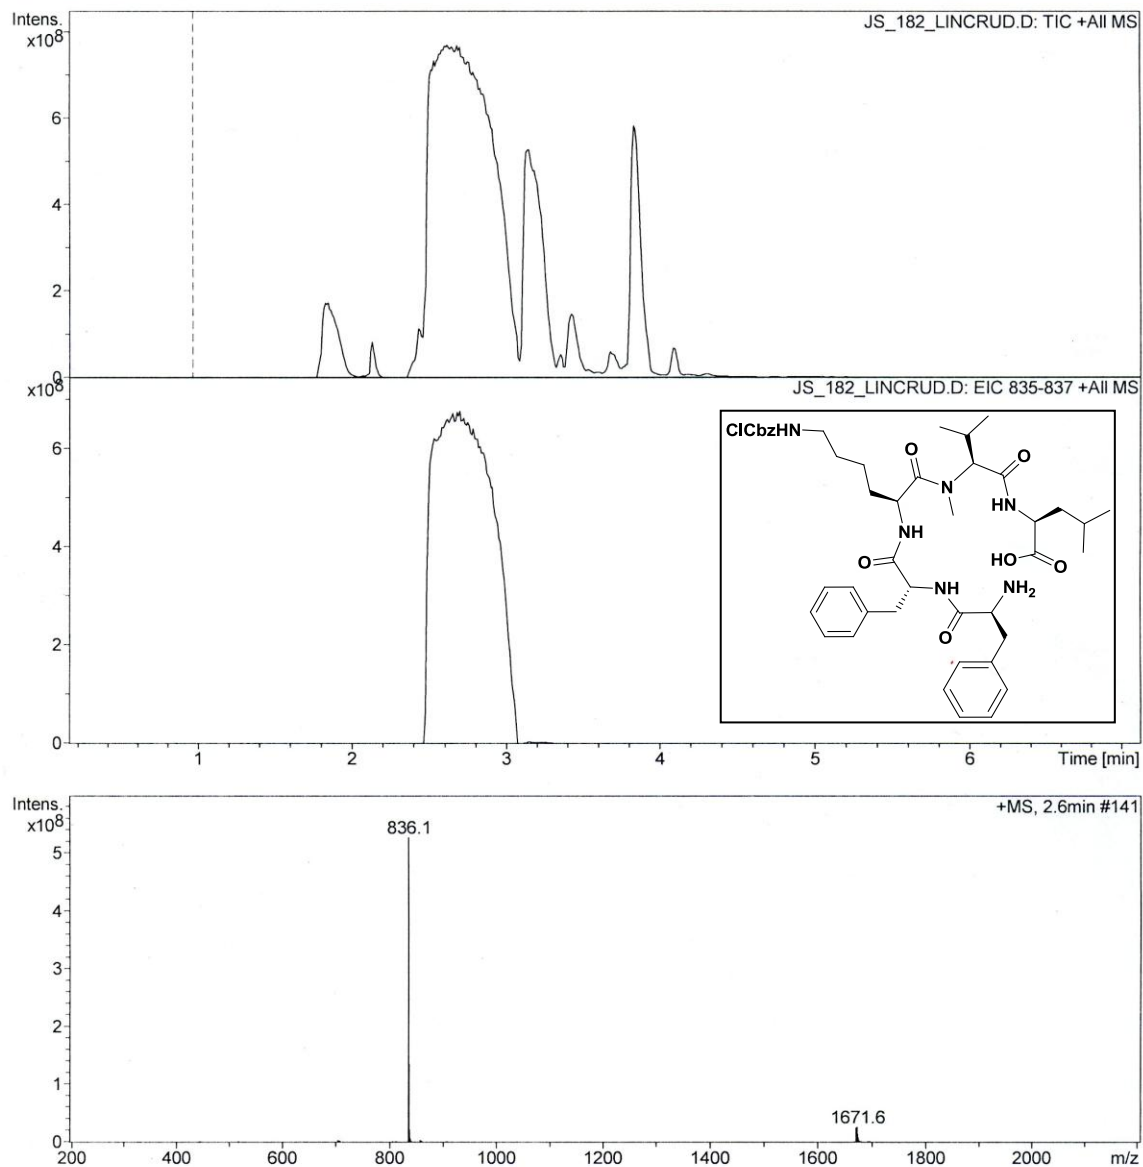

**Compound 39 LCMS Double Deprotected Linear Pentapeptide HO-Leu-N-Me-Val-Lys(2-Cl-Z)-D-Phe-Phe-NH<sub>2</sub> (MW = 835.4)**

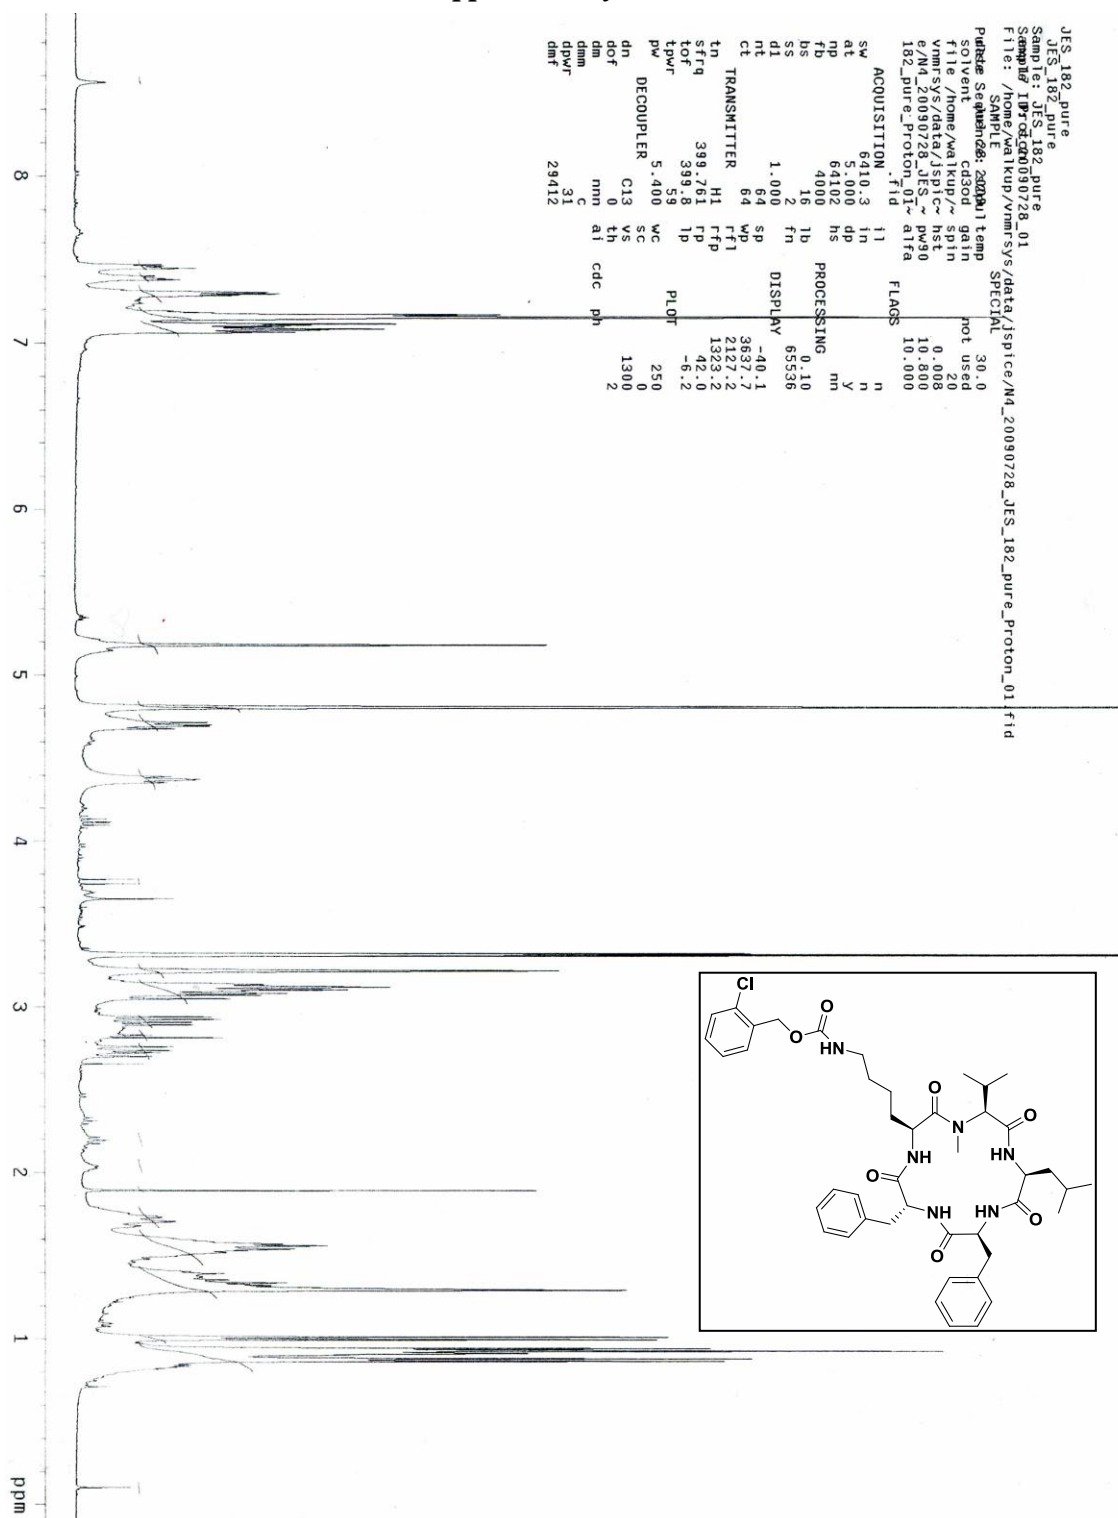

Compound 39 NMR Cyclized Pentapeptide Phe-Leu-N-Me-Val-Lys(2-Cl-Z)-D-Phe



## Display Report - All Windows Selected Analysis

**Analysis Name:** JS\_182\_FINAL.D **Instrument:** Agilent 6330 Ion Trap **Print Date:** 7/28/2009 12:18:35 PM  
**Method:** SANA\_LONG.M **Operator:** sdsu **Acq. Date:** 7/28/2009 12:09:13 PM  
**Sample Name:** JS\_182\_final  
**Analysis Info:**

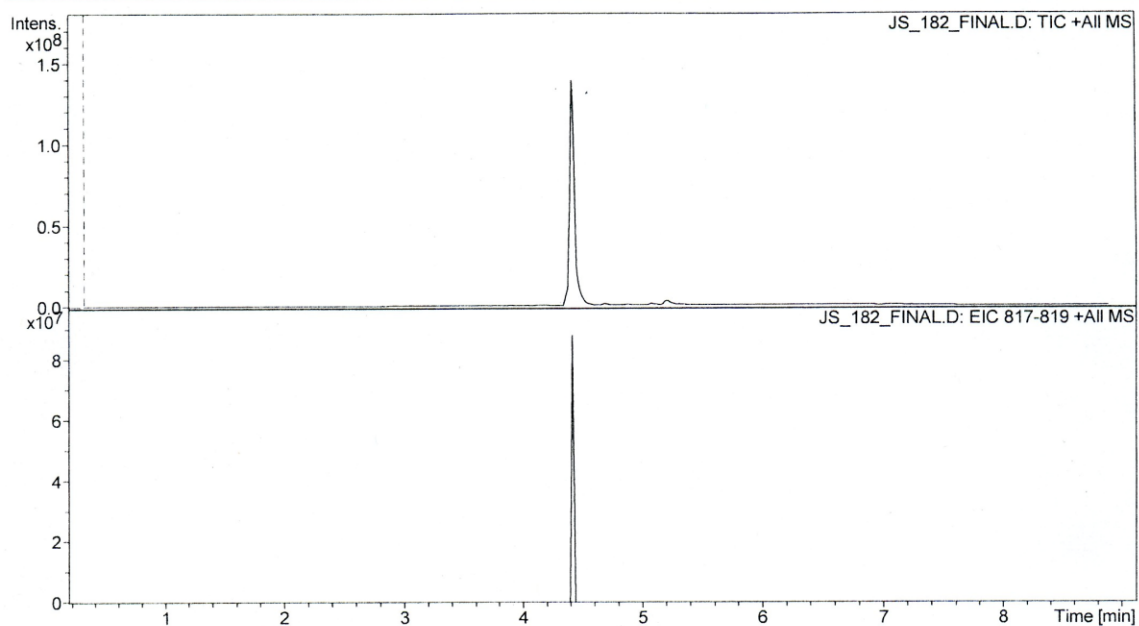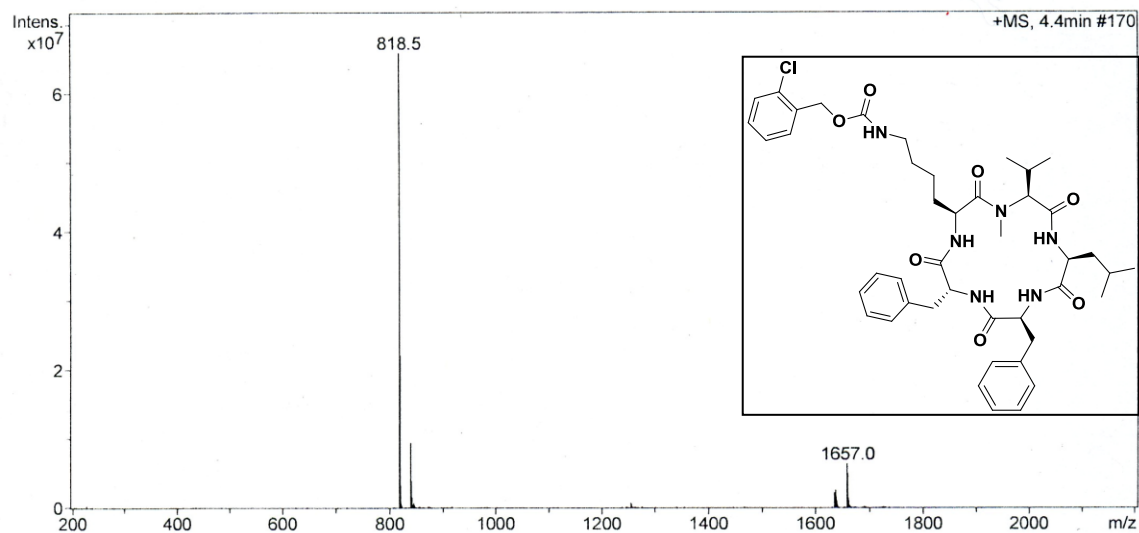

**Compound 39 LCMS Cyclized Pentapeptide Phe-Leu-N-Me-Val-Lys(2-Cl-Z)-D-Phe (MW=817.4)**

## SDSU

Project Name: Defaults  
 Reported by User: System

Breeze

## SAMPLE INFORMATION

Sample Name: JS\_182\_ss\_pure  
 Sample Type: Unknown  
 Vial: 1  
 Injection #: 185  
 Run Time: 16.00 Minutes

Acquired By: System  
 Sample Set Name:  
 Acq. Method: primary\_sanA\_ss\_ACN  
 Date Acquired: 7/31/2009 9:35:13 AM  
 Injection Volume: 48.00 ul

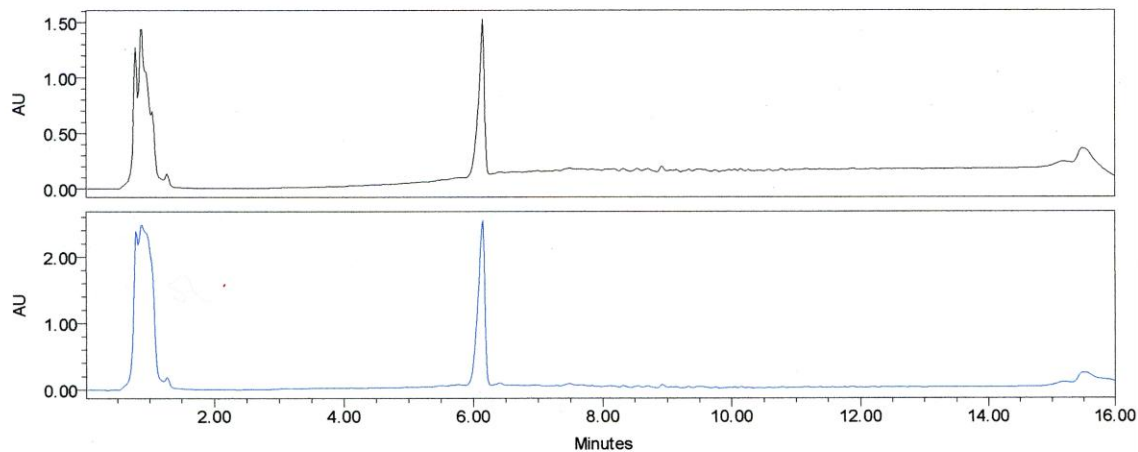

— Channel: 2487Channel 1 Channel Desc.: Processing Method: \*\*\*\*  
 — Channel: 2487Channel 2 Channel Desc.: Processing Method: \*\*\*\*

| Peak Name | RT (min) | Area ( $\mu\text{V}\cdot\text{sec}$ ) | % Area | Height ( $\mu\text{V}$ ) | Amount | Units |
|-----------|----------|---------------------------------------|--------|--------------------------|--------|-------|
| 1 ****    | ****     | ****                                  | ****   | ****                     | ****   | ****  |
| 2 ****    | ****     | ****                                  | ****   | ****                     | ****   | ****  |

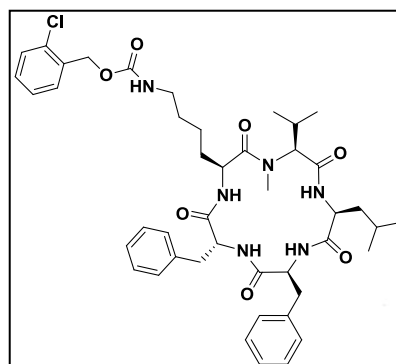

## Compound 39 HPLC Cyclized Pentapeptide Phe-Leu-N-Me-Val-Lys(2-Cl-Z)-D-Phe

## Display Report - All Windows Selected Analysis

**Analysis Name:** JS\_184\_LINCRU **Instrument:** Agilent 6330 Ion Trap **Print Date:** 6/25/2009 9:20:39 AM  
**Method:** SANA.M D.D **Operator:** sdsu **Acq. Date:** 6/24/2009 7:11:02 PM  
**Sample Name:** JS\_184\_lincrud  
**Analysis Info:**

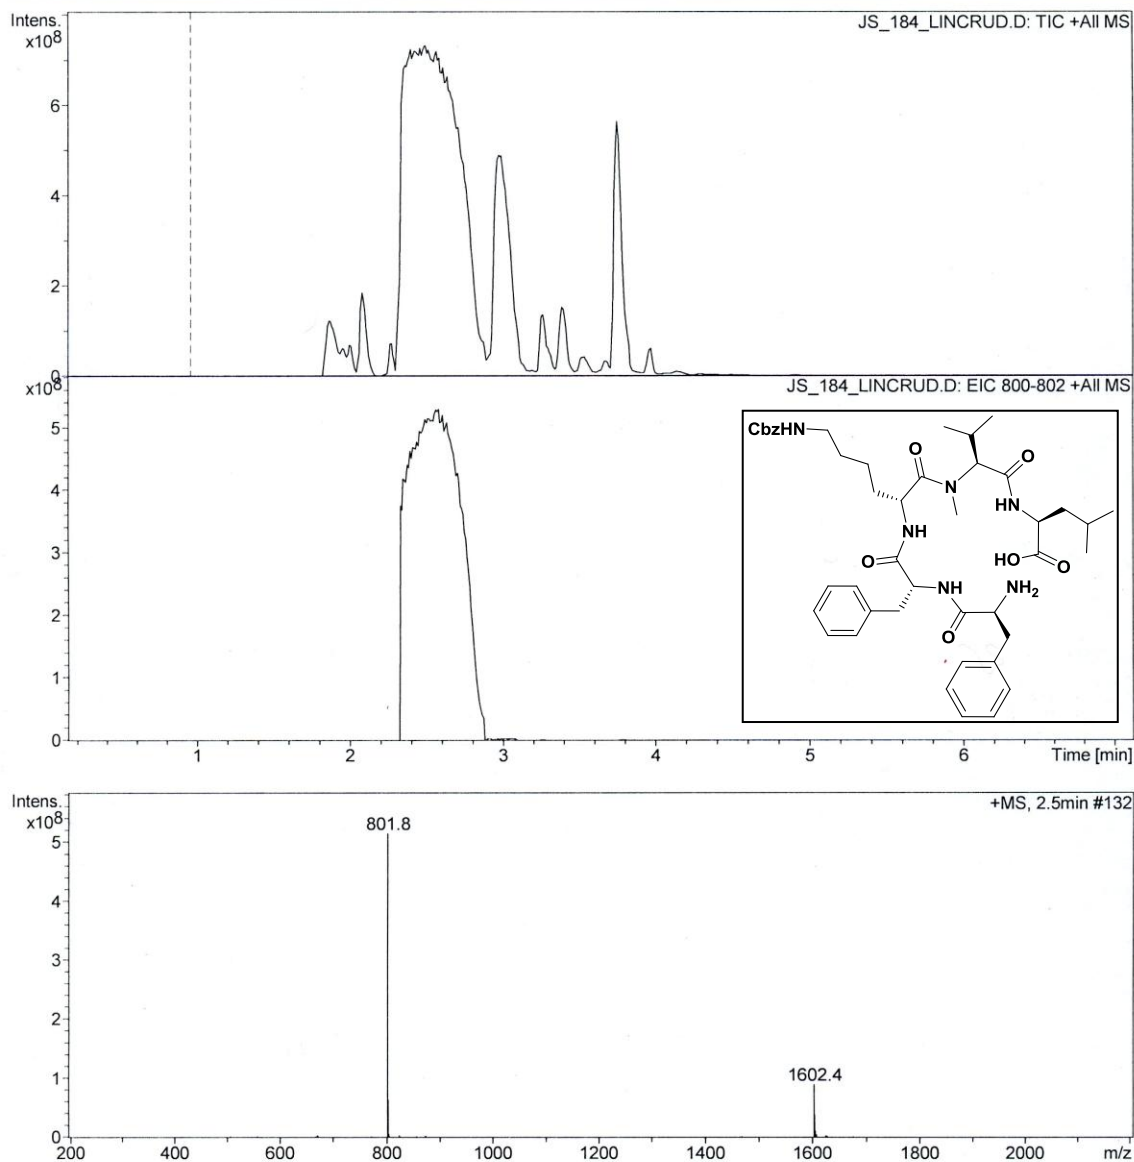

**Compound 40 LCMS Double Deprotected Linear Pentapeptide HO-Leu-N-Me-Val-D-Lys(Cbz)-D-Phe-Phe-NH<sub>2</sub> (MW = 801)**

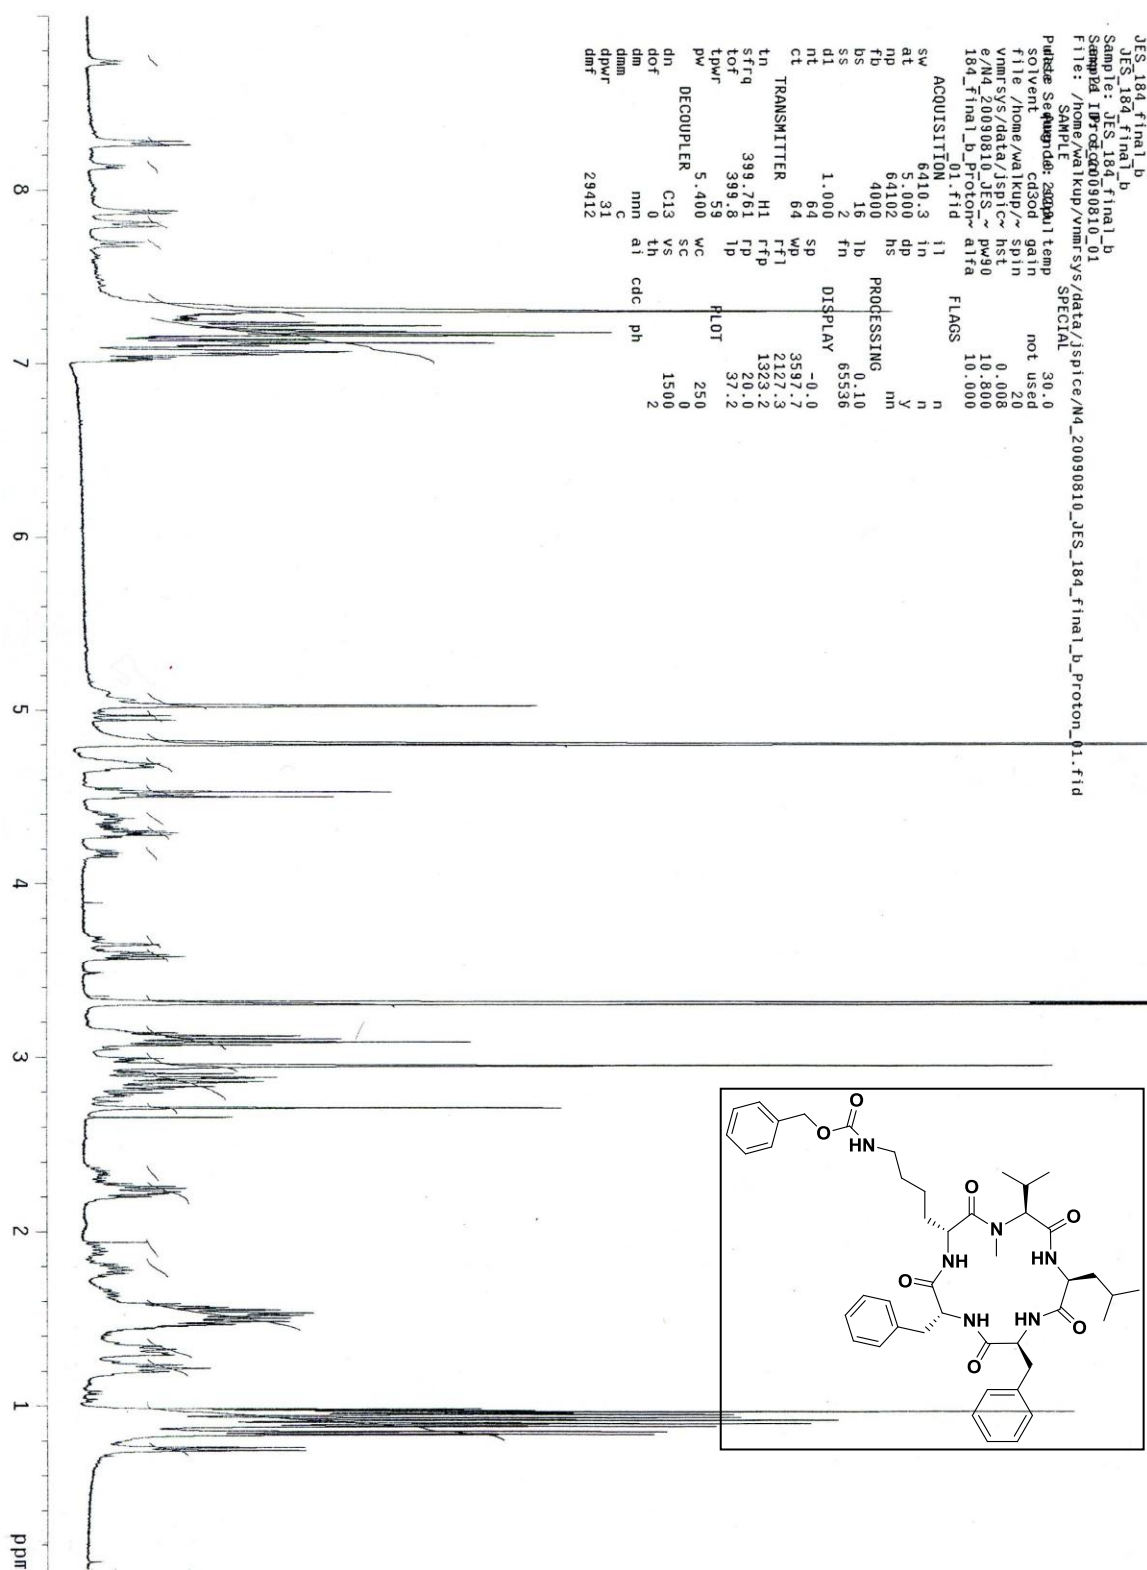

Compound 40 NMR Cyclized Pentapeptide Phe-Leu-N-Me-Val-D-Lys(Cbz)-D-Phe

## Display Report - All Windows Selected Analysis

**Analysis Name:** JS\_184\_AB.D    **Instrument:** Agilent 6330 Ion Trap    **Print Date:** 8/11/2009 11:58:37 AM  
**Method:** SANA\_LONG.M    **Operator:** sdsu    **Acq. Date:** 8/11/2009 11:43:34 AM  
**Sample Name:** JS\_184\_AB  
**Analysis Info:**

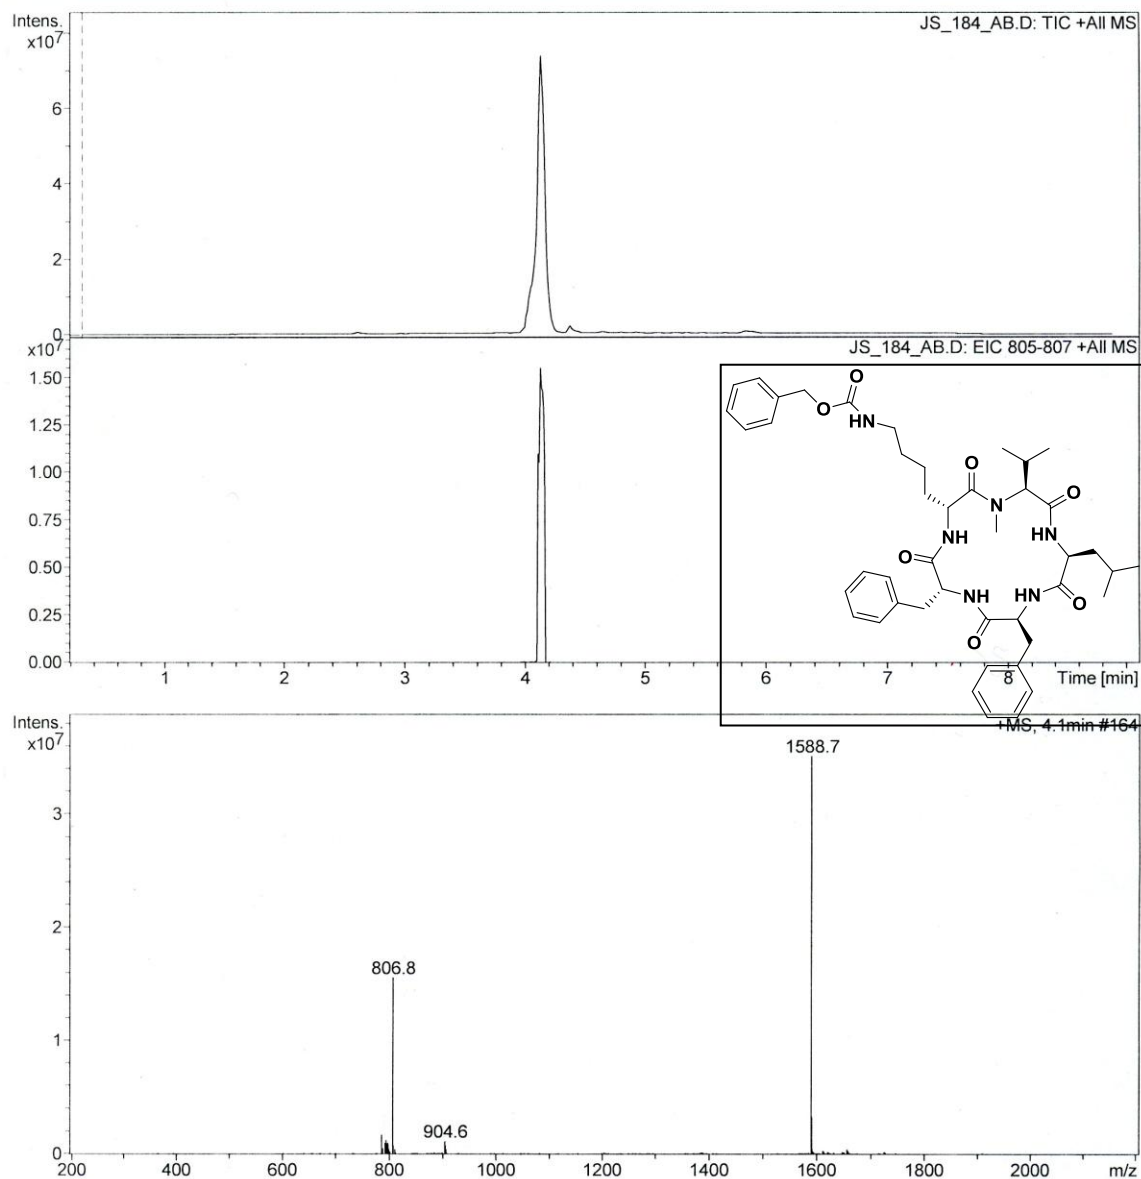

**Compound 40 LCMS Cyclized Pentapeptide Phe-Leu-N-Me-Val-D-Lys(Cbz)-D-Phe (MW= 783)**

SDSU

Project Name: Defaults  
Reported by User: System

Breeze

## SAMPLE INFORMATION

|              |                 |                   |                      |
|--------------|-----------------|-------------------|----------------------|
| Sample Name: | JS_184_ss_final | Acquired By:      | System               |
| Sample Type: | Unknown         | Sample Set Name:  |                      |
| Vial:        | 1               | Acq. Method:      | primary_sanA_ss_ACN  |
| Injection #: | 19              | Date Acquired:    | 8/11/2009 8:57:01 AM |
| Run Time:    | 16.00 Minutes   | Injection Volume: | 80.00 ul             |

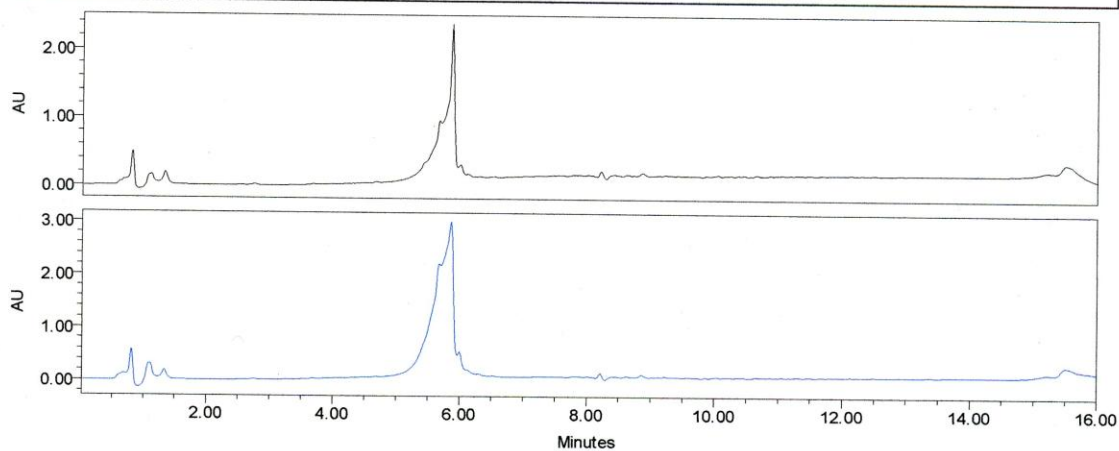

— Channel: 2487Channel 1 Channel Desc.: Processing Method: \*\*\*\*  
 — Channel: 2487Channel 2 Channel Desc.: Processing Method: \*\*\*\*

| Peak Name | RT (min) | Area (μV*sec) | % Area | Height (μV) | Amount | Units |
|-----------|----------|---------------|--------|-------------|--------|-------|
| 1         | ****     | ****          | ****   | ****        | ****   | ****  |
| 2         | ****     | ****          | ****   | ****        | ****   | ****  |

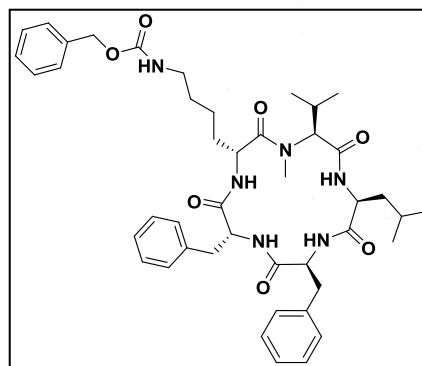

Compound 40 HPLC Cyclized Pentapeptide Phe-Leu-N-Me-Val-D-Lys(Cbz)-D-Phe



## Display Report - All Windows All Analyses

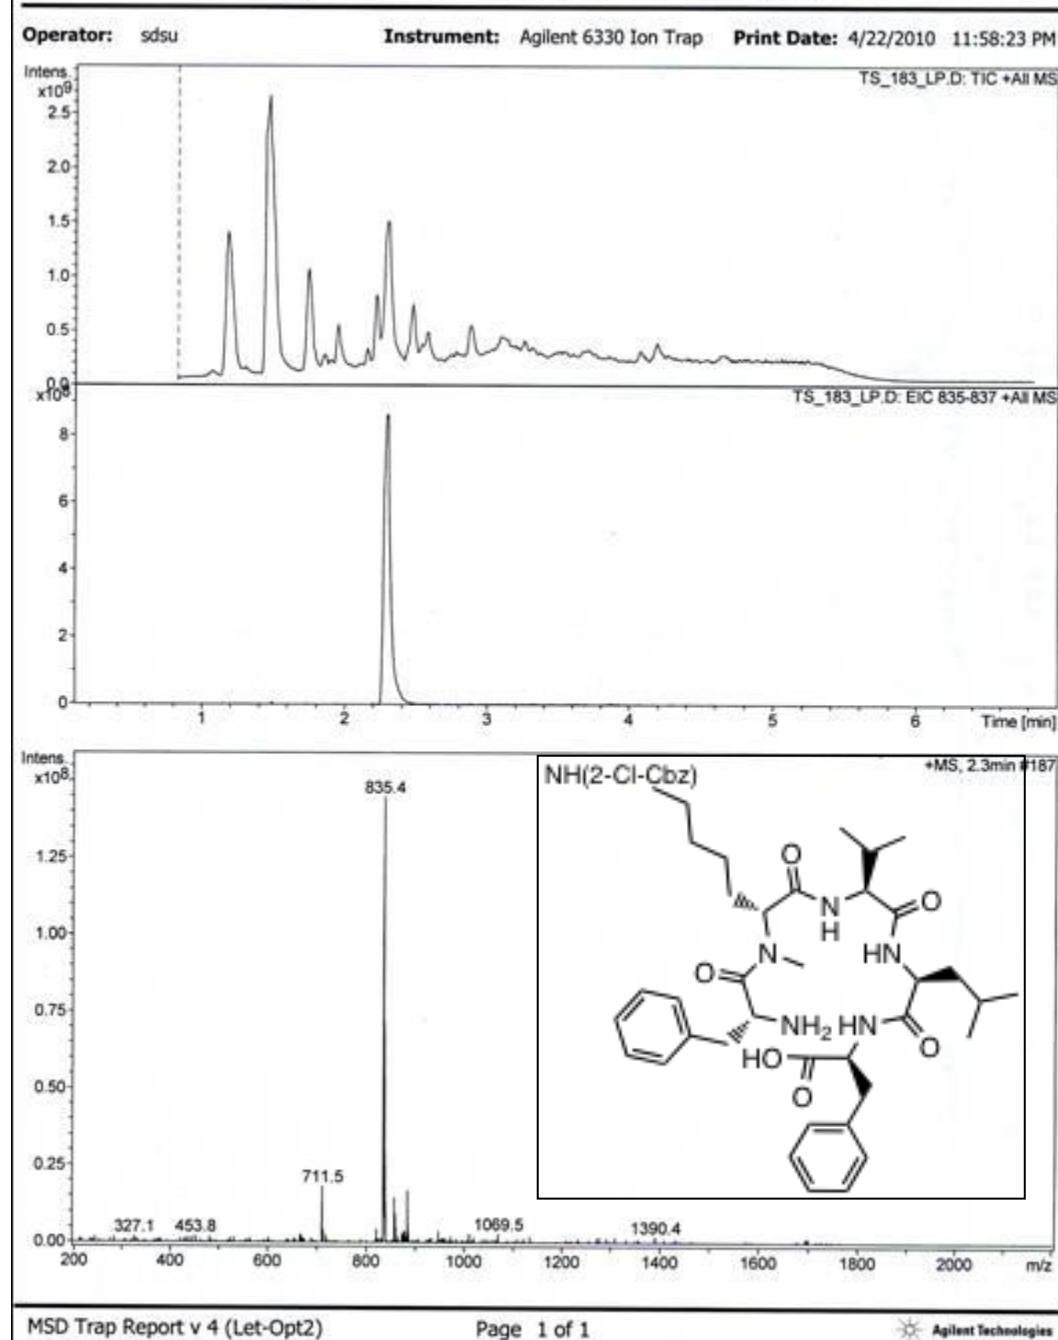

Compound 41 LCMS Double Deprotected Linear Pentapeptide HO-Phe-Leu-Val-N-Me-D-Lys(2-Cl-Cbz)-D-Phe-NH<sub>2</sub> (MW=835)

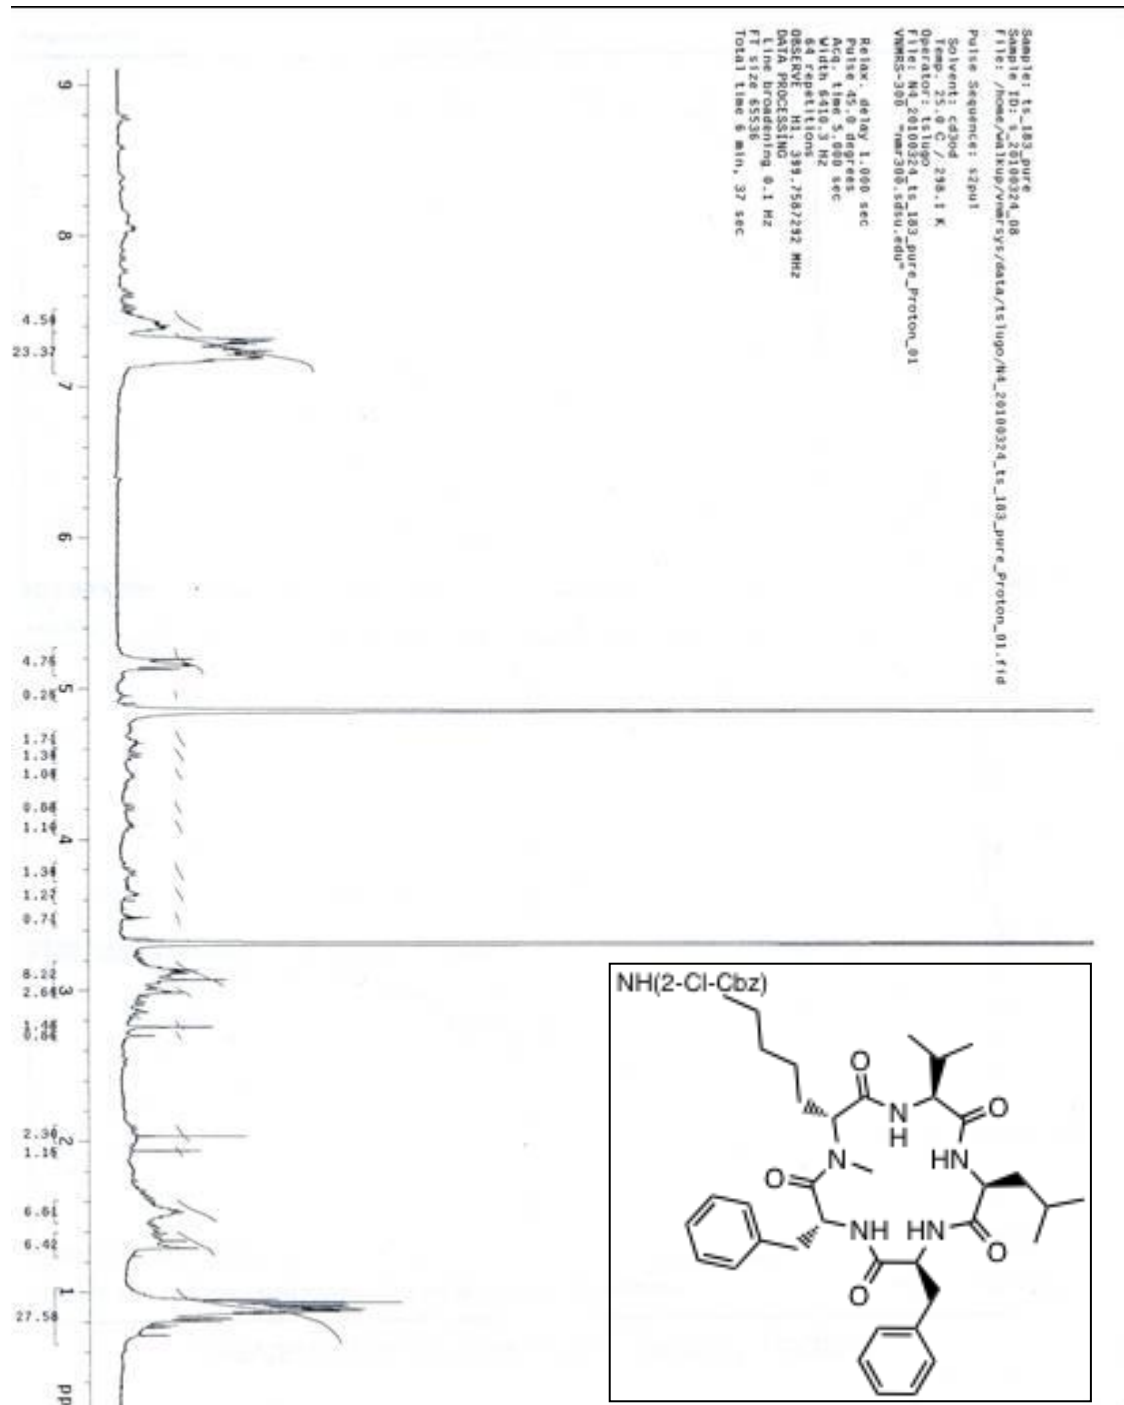

Compound 41 NMR Cyclized Pentapeptide Phe-Leu-Val-N-Me-D-Lys(2-Cl-Cbz)-D-Phe



## Display Report - All Windows All Analyses

Operator: sdsu Instrument: Agilent 6330 Ion Trap Print Date: 4/23/2010 12:00:04 AM

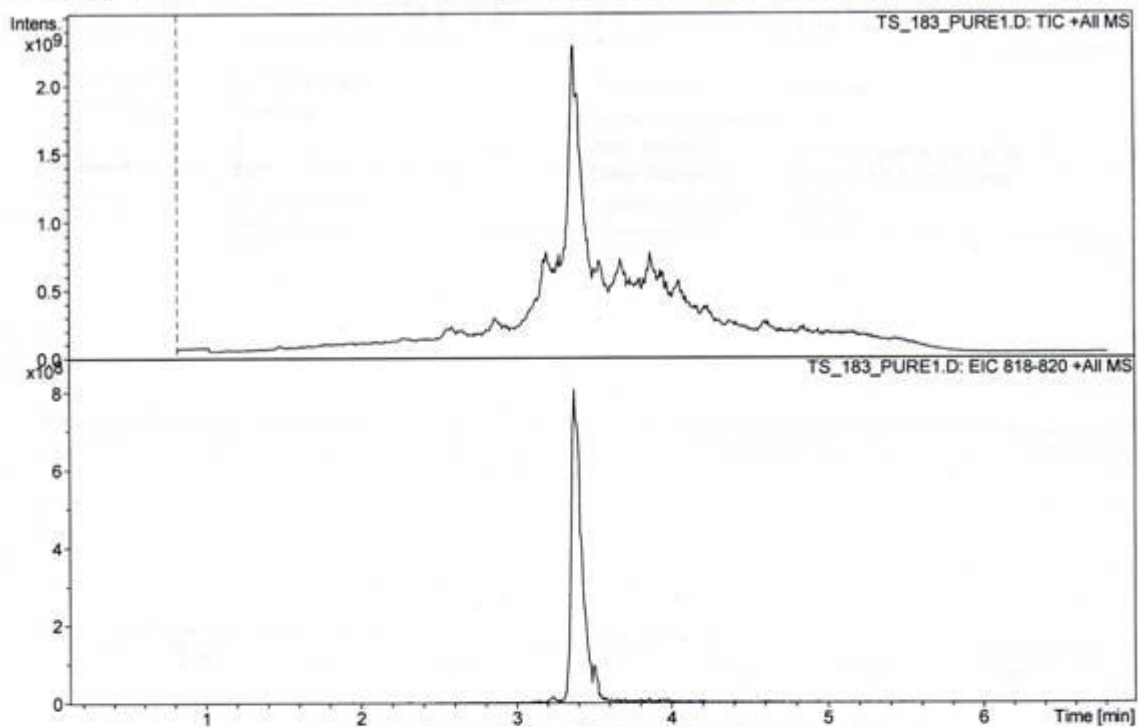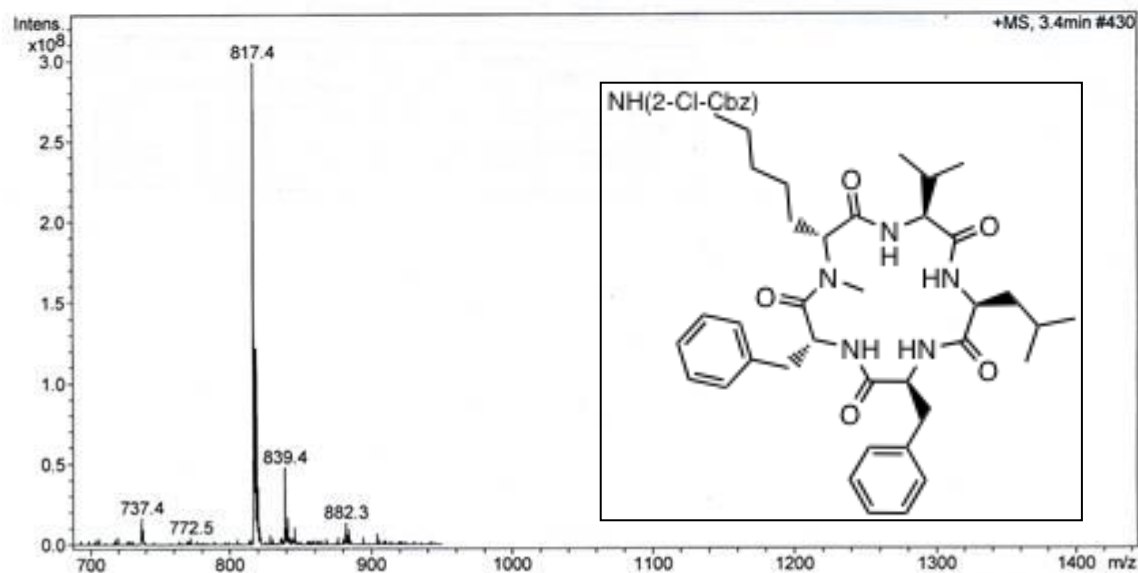

Compound 41 LCMS Cyclized Pentapeptide Phe-Leu-Val-N-Me-D-Lys(2-Cl-Cbz)-D-Phe (MW=817)

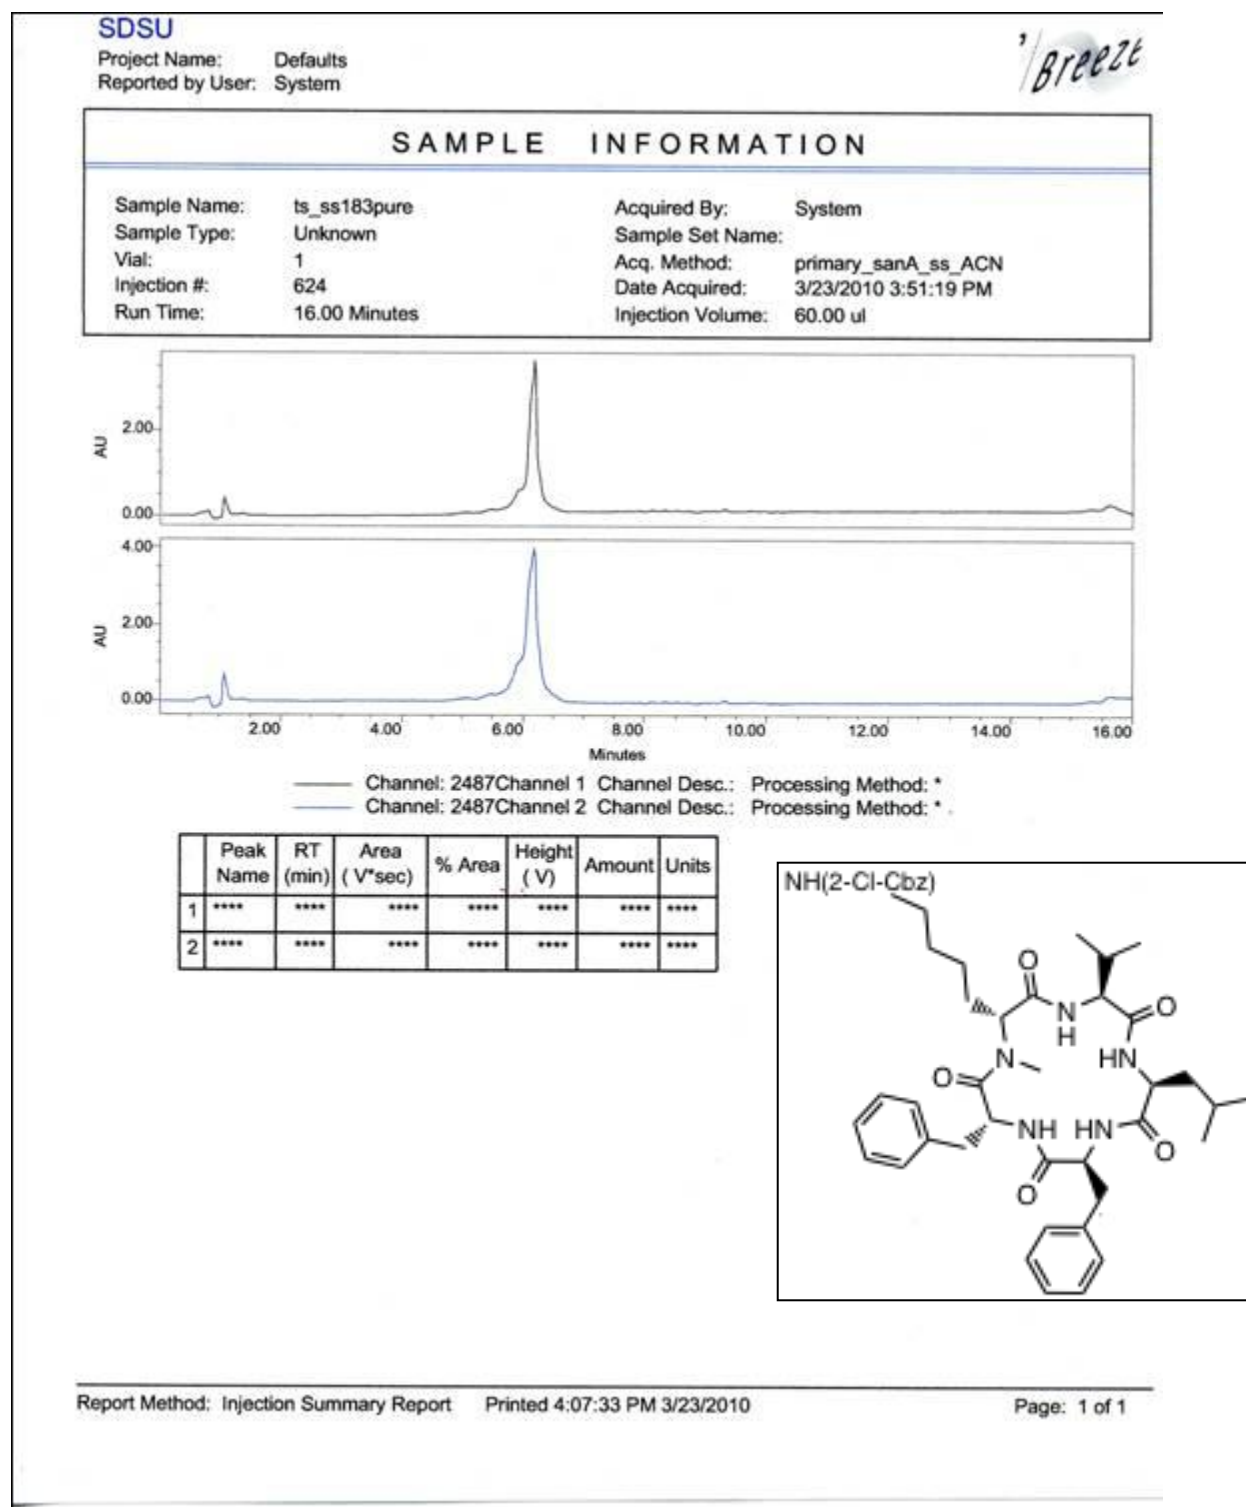

Compound 41 HPLC Cyclized Pentapeptide Phe-Leu-Val-N-Me-D-Lys(2-Cl-Cbz)-D-Phe

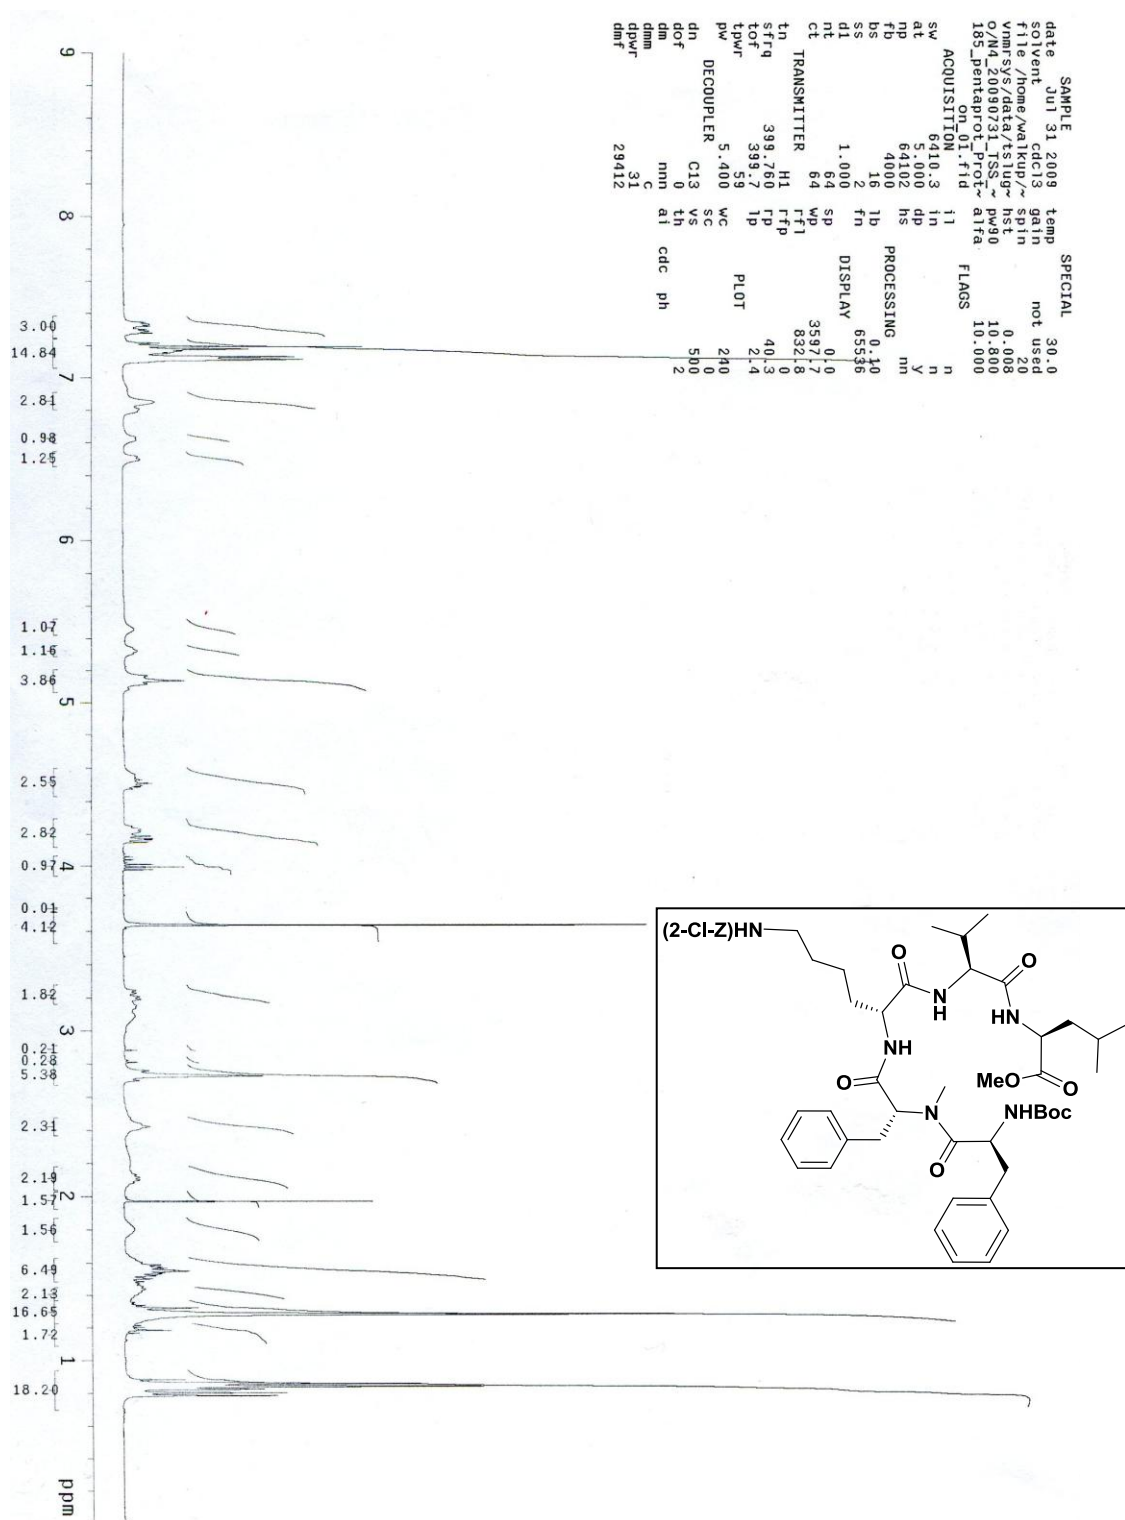

Compound 42 NMR Linear Pentapeptide MeO-Leu-Val-D-Lys(2-Cl-Z)-N-Me-D-Phe-Phe-NHBoc

## Display Report - All Windows Selected Analysis

**Analysis Name:** TS\_185\_PENTA. **Instrument:** Agilent 6330 Ion Trap **Print Date:** 9/26/2009 1:01:11 PM  
**Method:** SANA\_LOW.G.M **Operator:** sdsu **Acq. Date:** 7/30/2009 4:59:22 PM  
**Sample Name:** ts\_185\_penta  
**Analysis Info:**

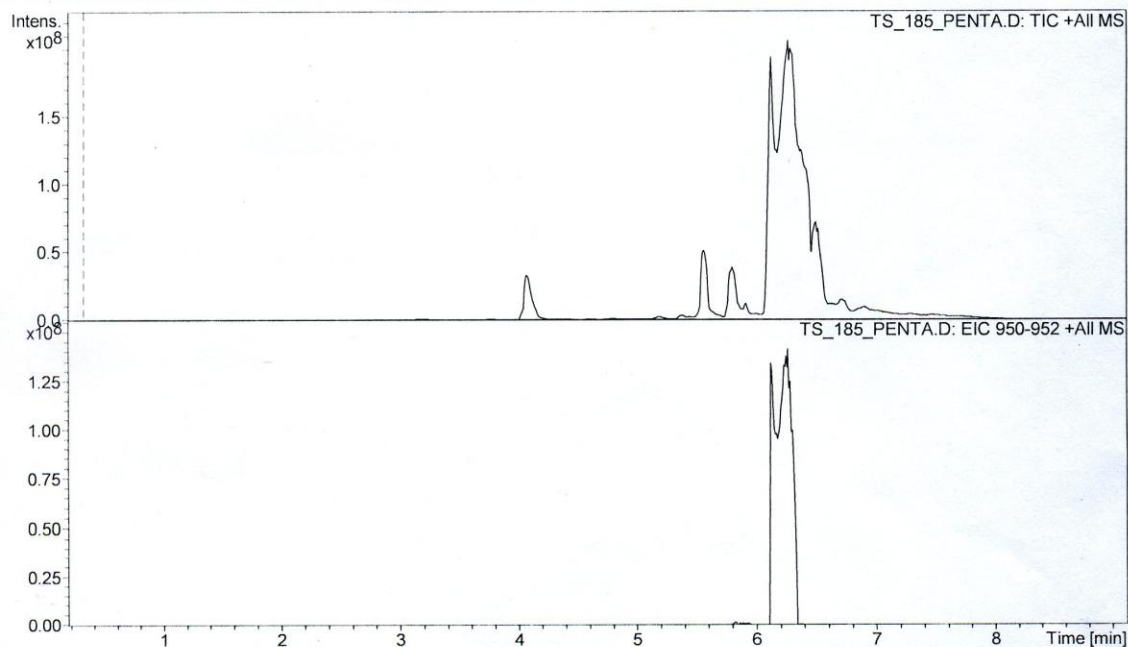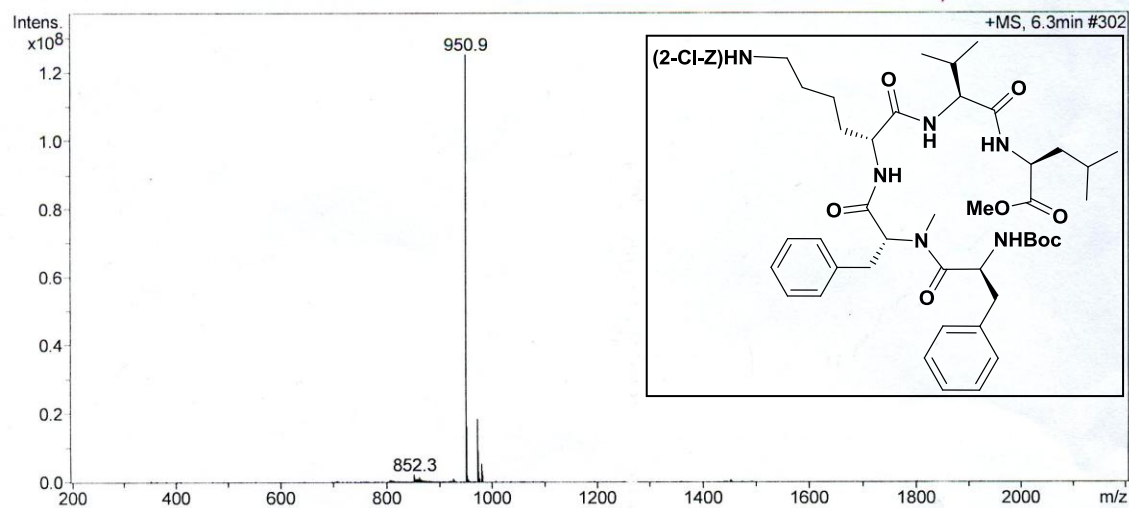

**Compound 42 LCMS Linear Pentapeptide MeO-Leu-Val-D-Lys(2-Cl-Z)-N-Me-D-Phe-Phe-NHBoc (MW = 950)**

## Display Report - All Windows Selected Analysis

**Analysis Name:** TS\_185\_DD.D **Instrument:** Agilent 6330 Ion Trap **Print Date:** 9/26/2009 12:59:44 PM  
**Method:** SANA.M **Operator:** sdsu **Acq. Date:** 8/6/2009 1:58:10 PM  
**Sample Name:** ts\_185\_dd  
**Analysis Info:**

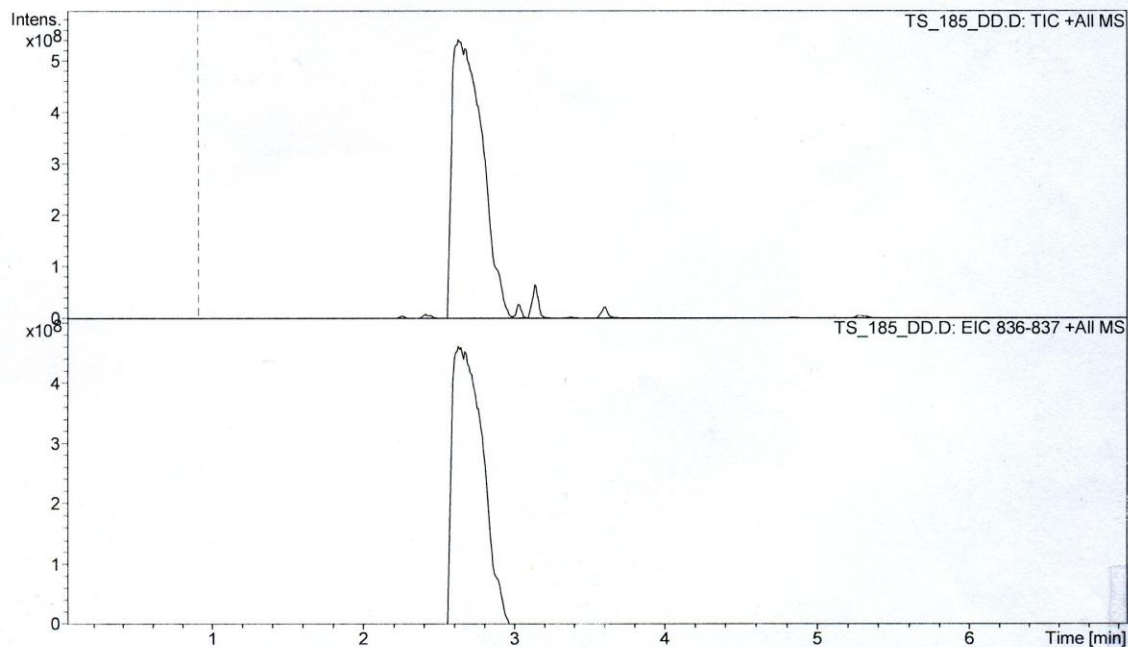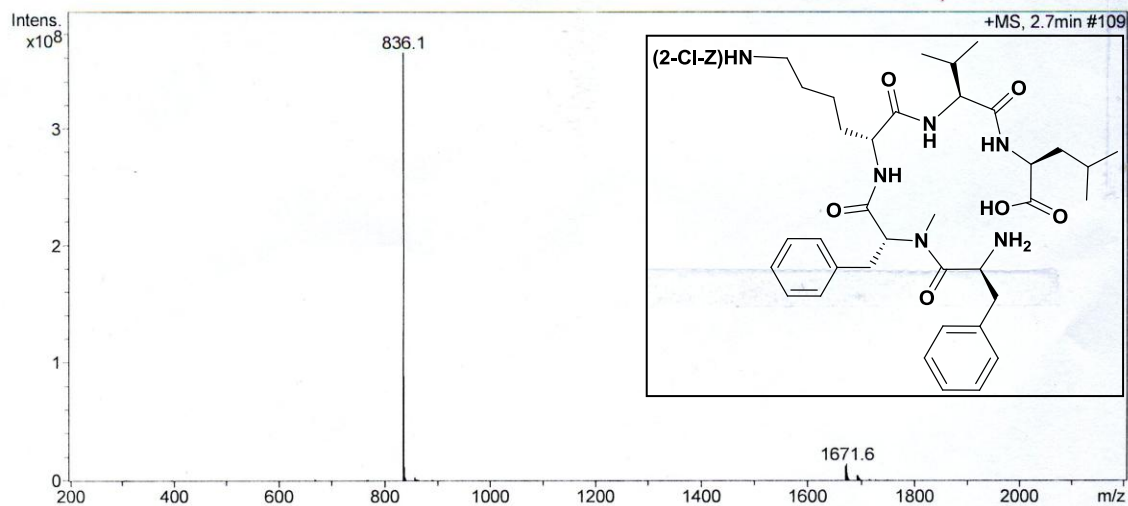

**Compound 42 LCMS Double Deprotected Linear Pentapeptide HO-Leu-Val-D-Lys(2-Cl-Z)-N-Me-D-Phe-Phe-NH<sub>2</sub> (MW = 836)**



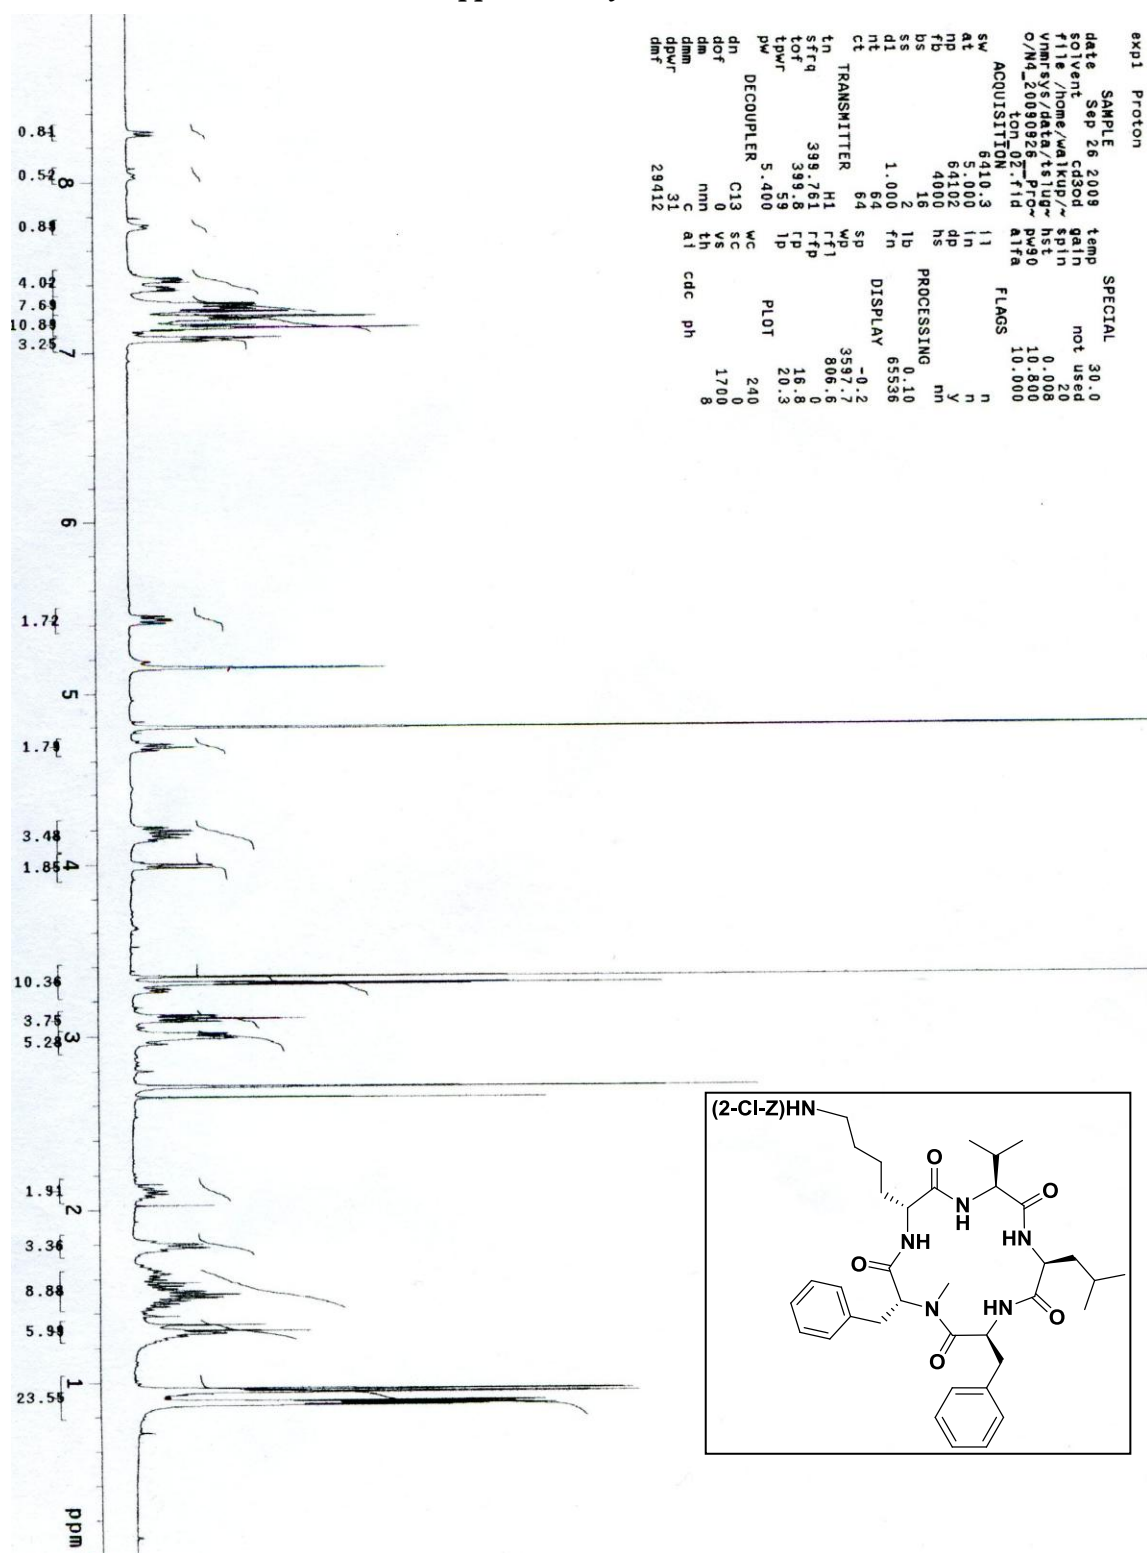

Compound 42 NMR Cyclized Pentapeptide Phe-Leu-Val-D-Lys(2-Cl-Z)-N-Me-D-Phe

## Display Report - All Windows Selected Analysis

**Analysis Name:** TS\_185\_FINAL.D **Instrument:** Agilent 6330 Ion Trap **Print Date:** 9/25/2009 3:53:57 PM  
**Method:** SANA.M **Operator:** sdsu **Acq. Date:** 9/25/2009 3:37:40 PM  
**Sample Name:** ts\_185\_final  
**Analysis Info:**

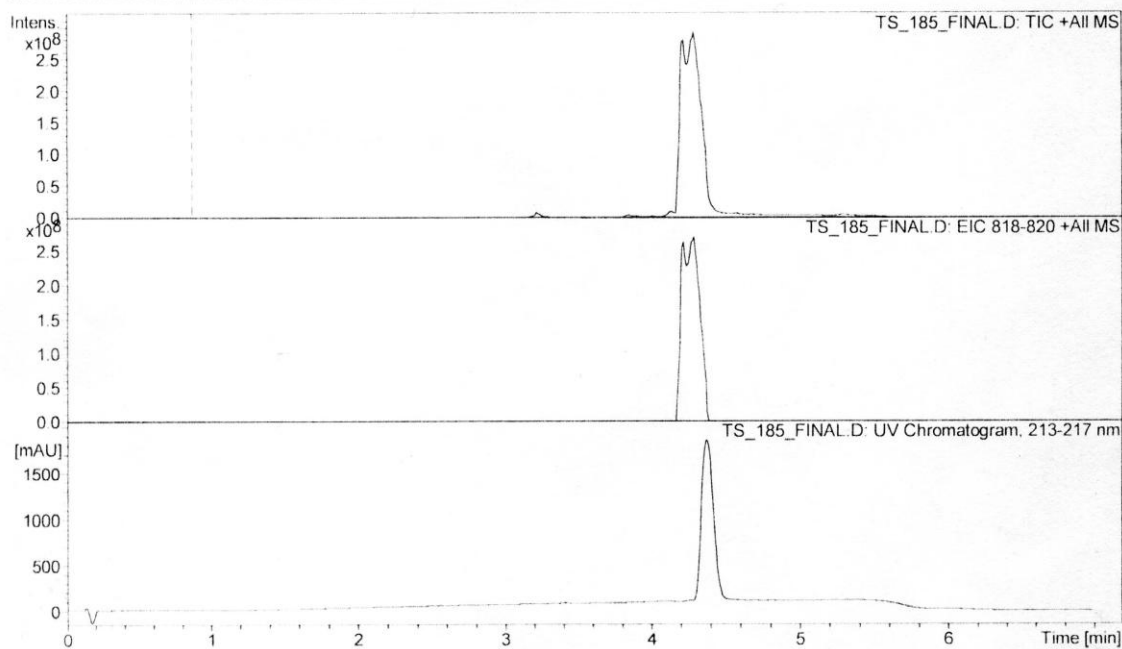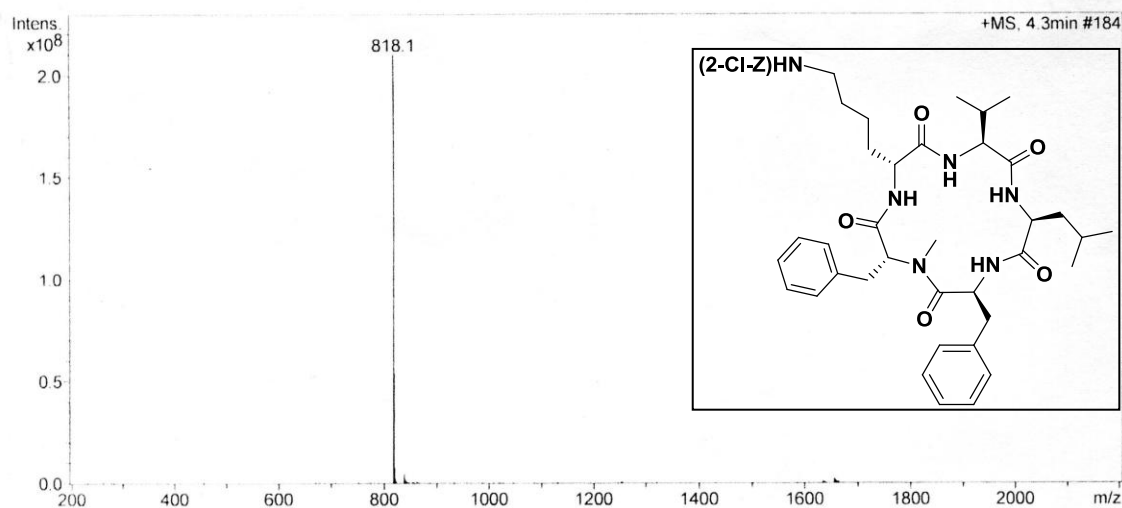

**Compound 42 LCMS Cyclized Pentapeptide Phe-Leu-Val-D-Lys(2-Cl-Z)-N-Me-D-Phe (MW=818.4)**

SDSU

Project Name: Defaults  
Reported by User: System

Breeze

## SAMPLE INFORMATION

|              |               |                   |                      |
|--------------|---------------|-------------------|----------------------|
| Sample Name: | ts_185_ss     | Acquired By:      | System               |
| Sample Type: | Unknown       | Sample Set Name:  |                      |
| Vial:        | 1             | Acq. Method:      | primary_sanA_ss_ACN  |
| Injection #: | 202           | Date Acquired:    | 9/25/2009 2:41:51 PM |
| Run Time:    | 16.00 Minutes | Injection Volume: | 50.00 ul             |

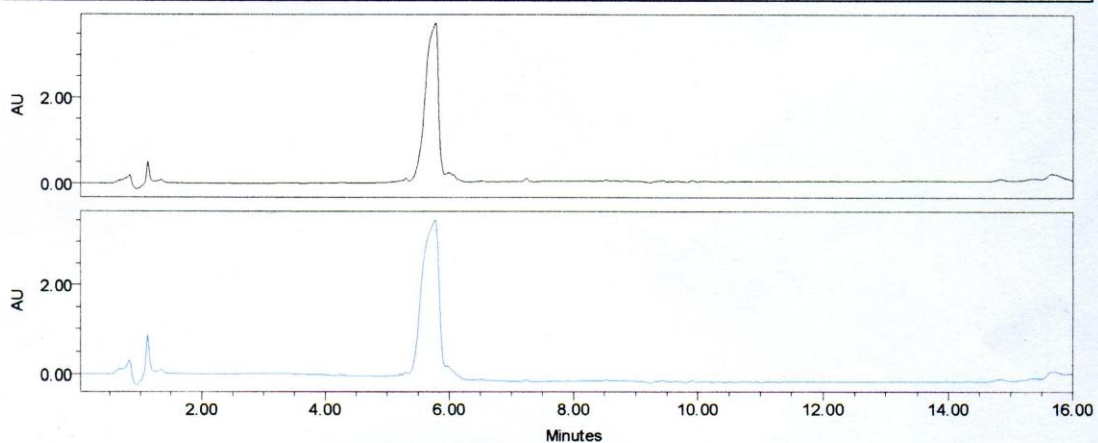

— Channel: 2487Channel 1 Channel Desc.: Processing Method: \*\*\*\*  
 — Channel: 2487Channel 2 Channel Desc.: Processing Method: \*\*\*\*

| Peak Name | RT (min) | Area (μV*sec) | % Area | Height (μV) | Amount | Units |
|-----------|----------|---------------|--------|-------------|--------|-------|
| 1 ****    | ****     | ****          | ****   | ****        | ****   | ****  |
| 2 ****    | ****     | ****          | ****   | ****        | ****   | ****  |

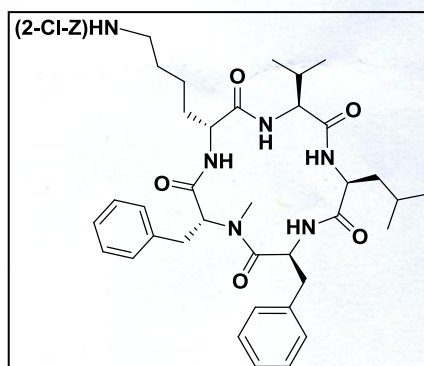

Compound 42 HPLC Cyclized Pentapeptide Phe-Leu-Val-D-Lys(2-Cl-Z)-N-Me-D-Phe



## Display Report - All Windows Selected Analysis

**Analysis Name:** VJ\_145\_146\_PE **Instrument:** Agilent 6330 Ion Trap **Print Date:** 8/14/2009 3:08:02 PM  
**Method:** SANA.M NT\_DD\_TEST.D **Operator:** sdsu **Acq. Date:** 5/14/2009 2:49:09 PM  
**Sample Name:** VJ\_145\_146\_pent\_DD\_test  
**Analysis Info:**

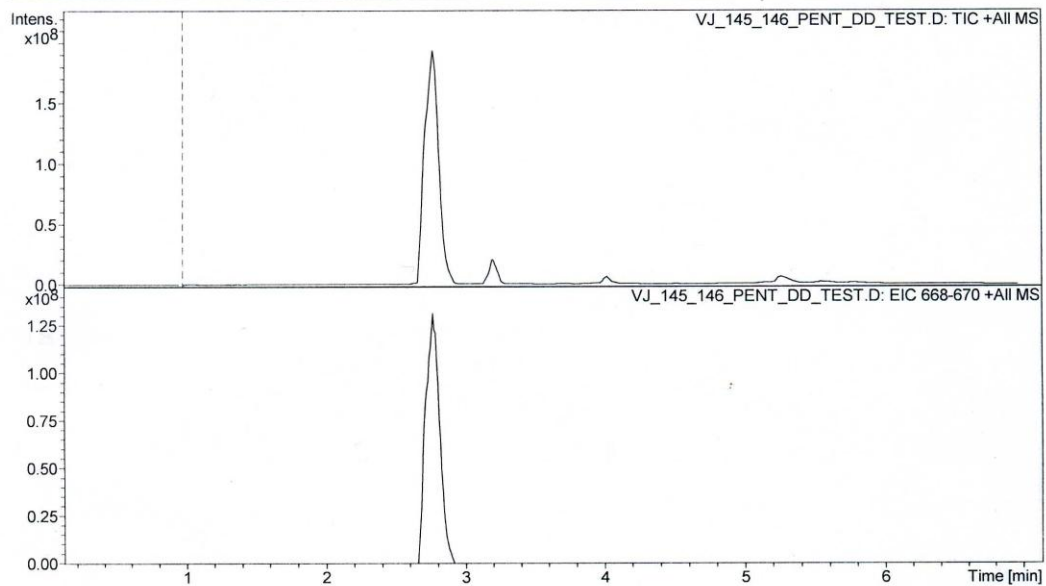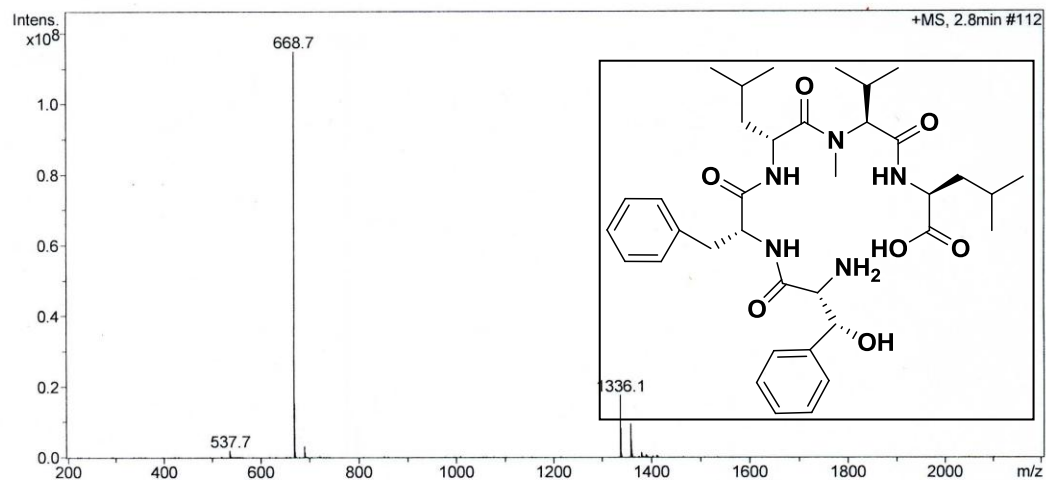

**Compound 43 LCMS Double Deprotected Linear Pentapeptide HO-Leu-N-Me-Val-D-Leu-D-Phe-β-OH-Phe-NH<sub>2</sub> (MW=668)**

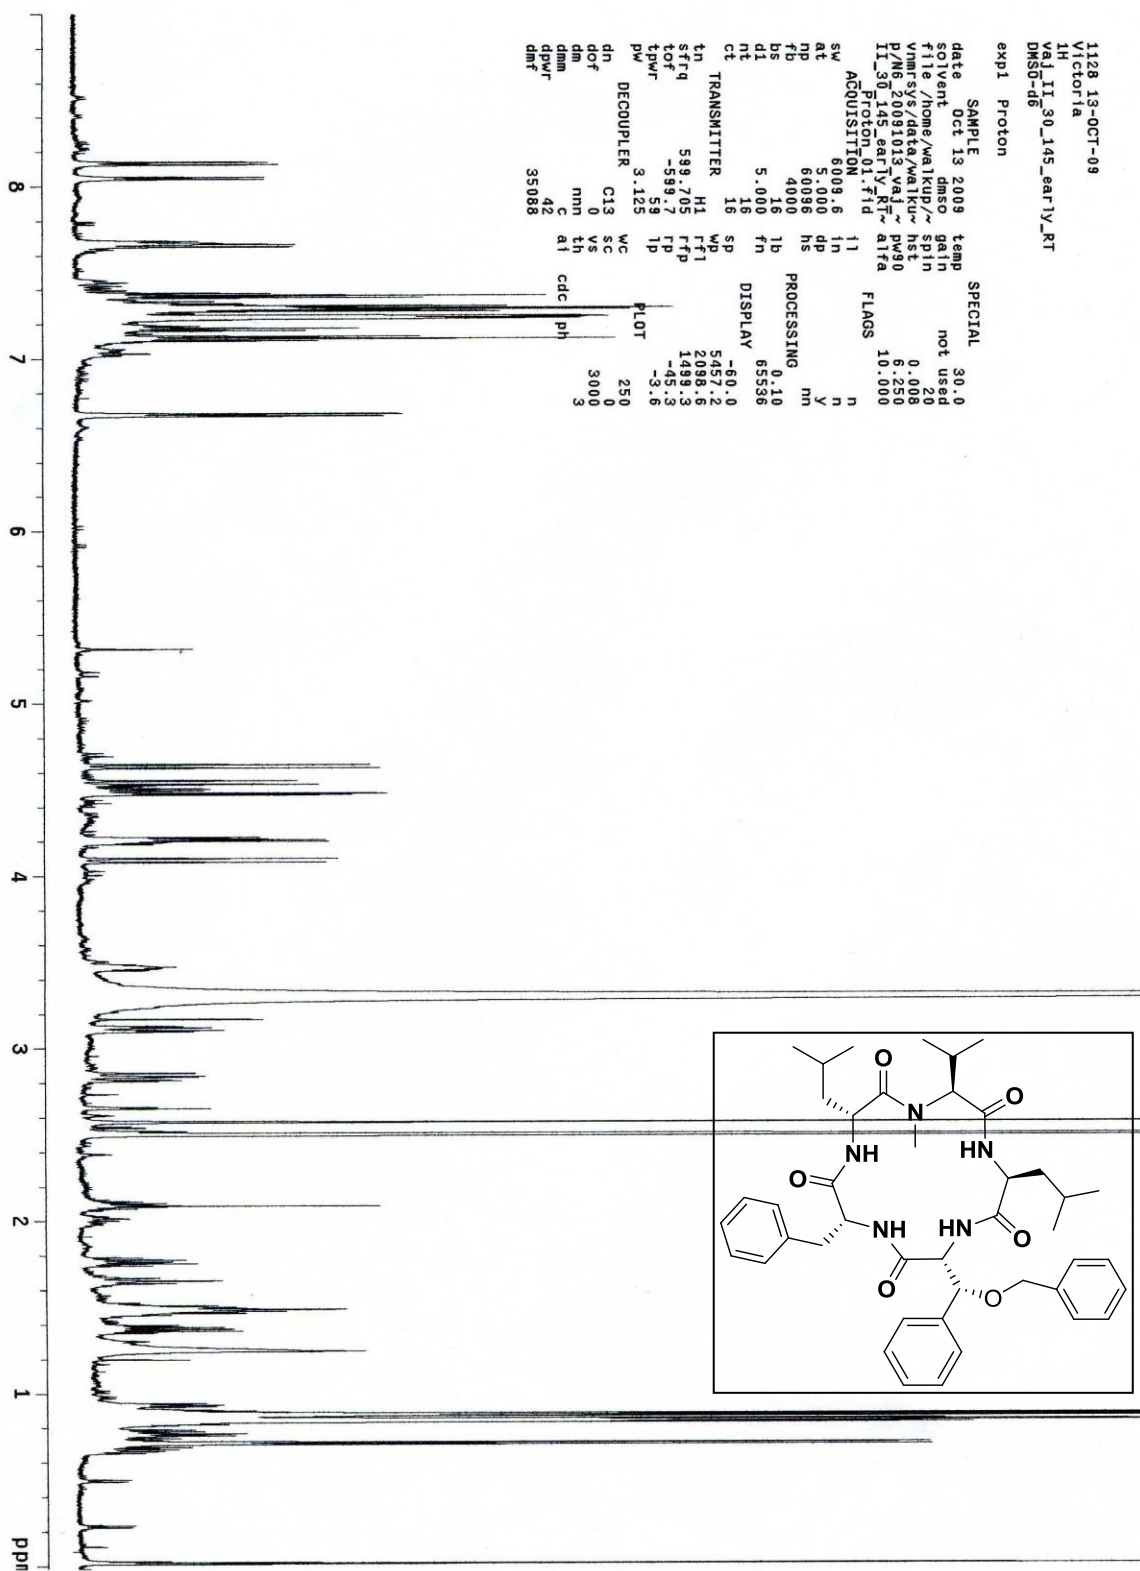Compound 43 NMR Cyclized Pentapeptide  $\beta$ -benzyloxy-Phe-Leu-N-Me-Val-D-Leu-D-Phe

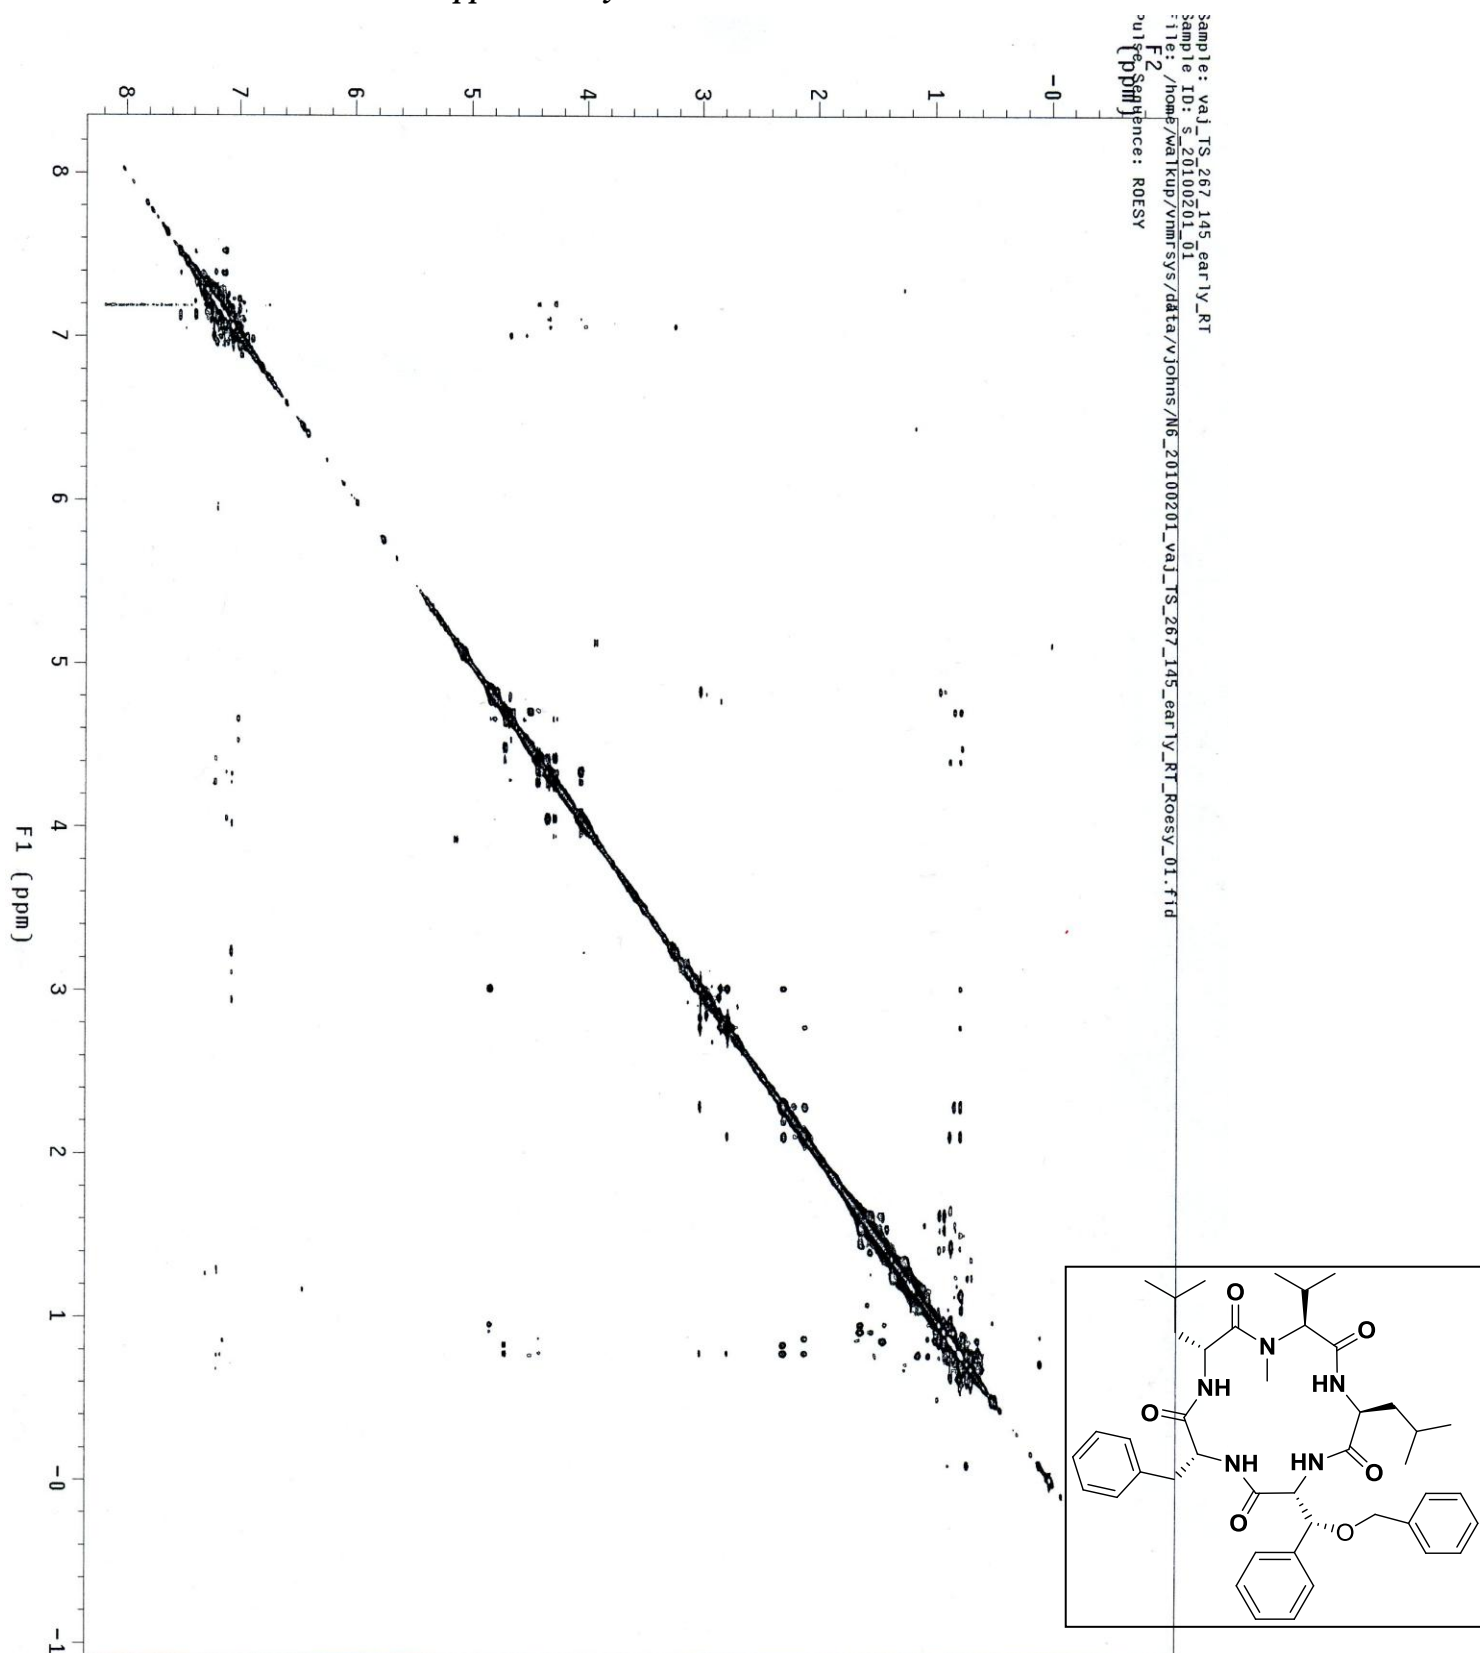**Compound 43 ROESY NMR Cyclized Pentapeptide  $\beta$ -benzoxy-Phe-Leu-N-Me-Val-D-Leu-D-Phe**

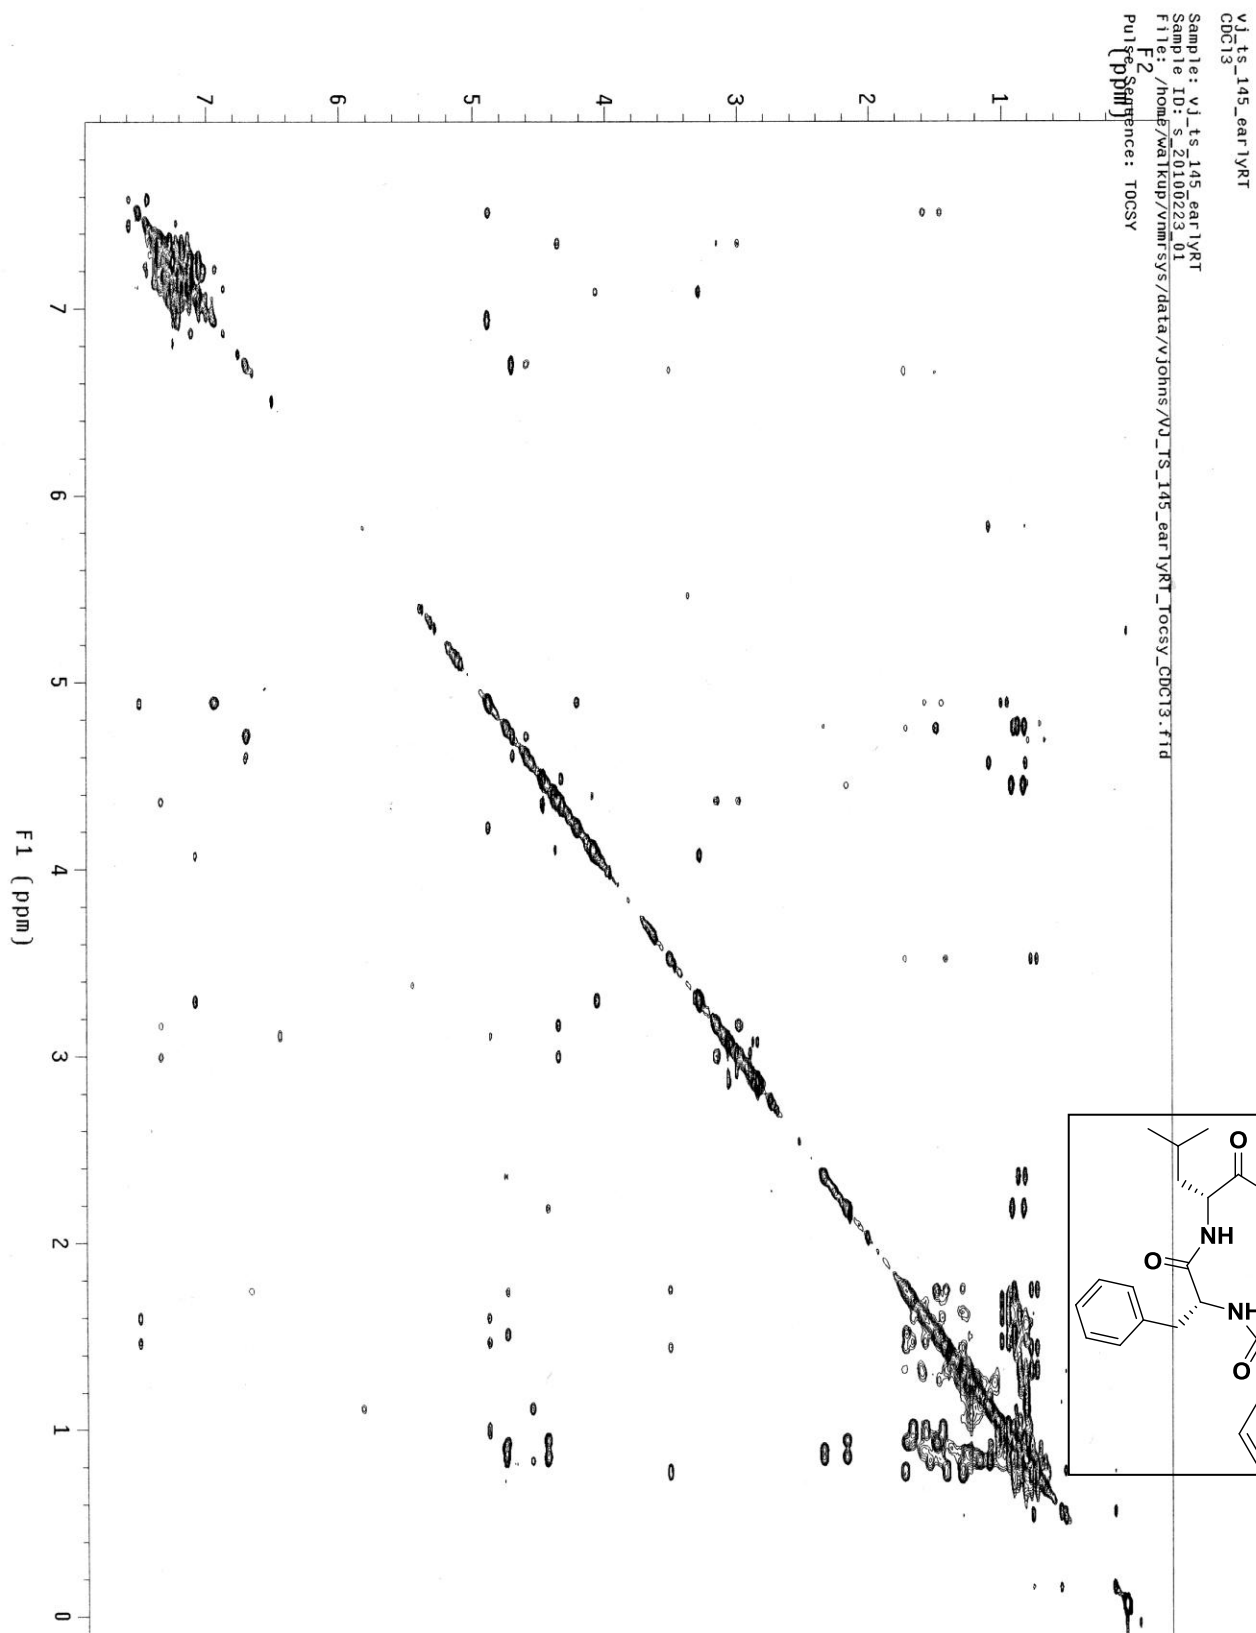Compound 43 TOCSY NMR Cyclized Pentapeptide  $\beta$ -benzoxy-Phe-Leu-N-Me-Val-D-Leu-D-Phe

## Display Report - All Windows Selected Analysis

**Analysis Name:** VJ(II)30\_145\_EA **Instrument:** Agilent 6330 Ion Trap **Print Date:** 10/14/2009 10:44:41 AM  
**Method:** SANA.M RLY\_RT.D **Operator:** sdsu **Acq. Date:** 9/28/2009 4:33:40 PM  
**Sample Name:** VJ(II)30\_145\_Early\_RT  
**Analysis Info:**

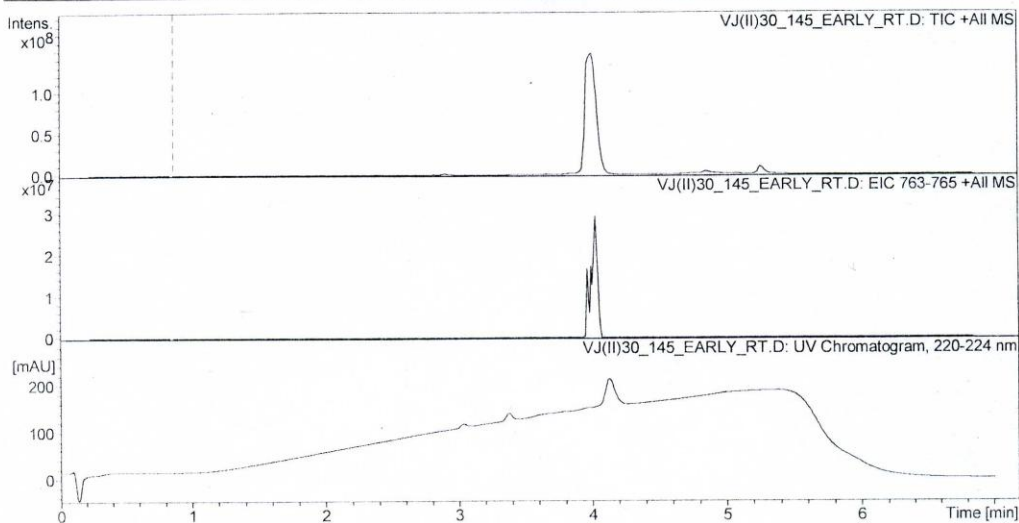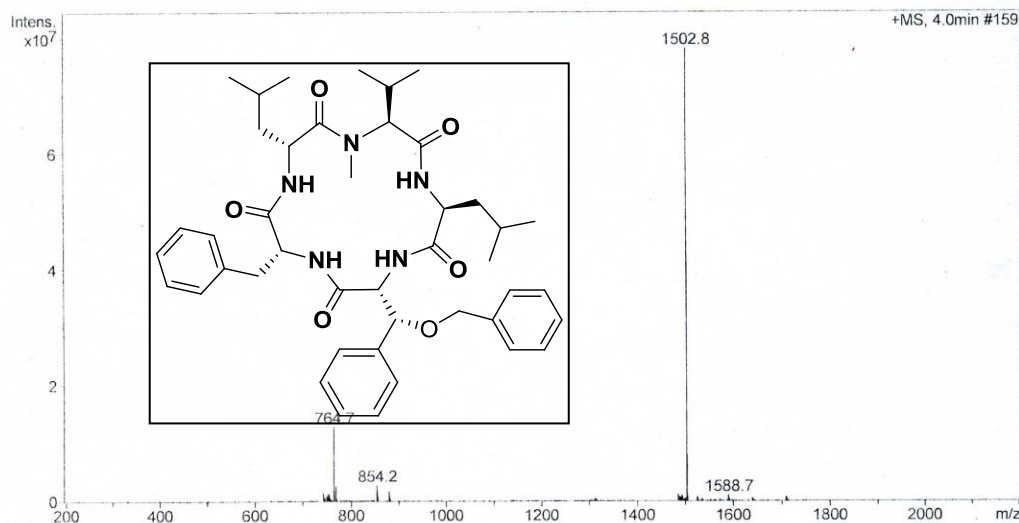

**Compound 43 LCMS Cyclized Pentapeptide  $\beta$ -benzoxy-Phe-Leu-N-Me-Val-D-Leu-D-Phe (MW=740)**

SDSU

Project Name: Defaults

Reported by User: System

Breeze

## SAMPLE INFORMATION

Sample Name: VJ(l)30\_145\_Early\_RT

Acquired By: System

Sample Type: Unknown

Sample Set Name:

Vial: 1

Acq. Method: primary\_sanA\_ss\_ACN

Injection #: 245

Date Acquired: 10/13/2009 5:20:10 PM

Run Time: 16.00 Minutes

Injection Volume: 50.00 ul

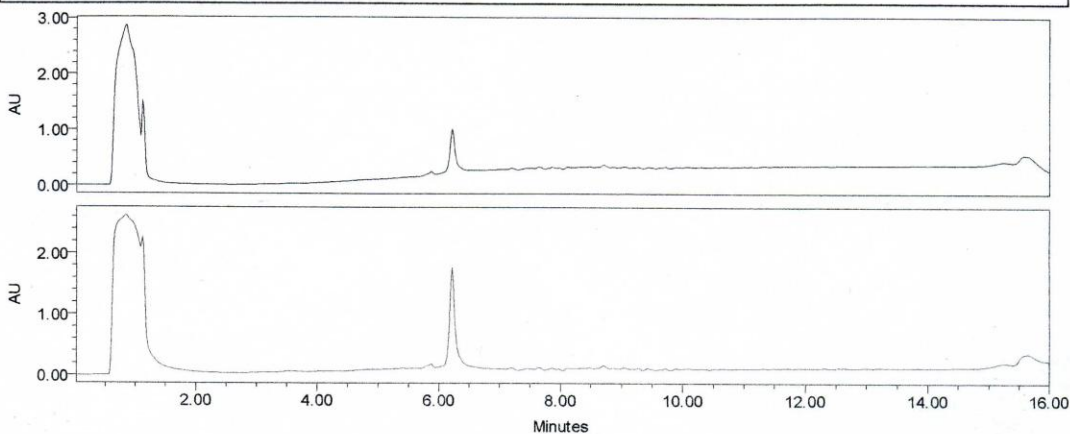

— Channel: 2487Channel 1 Channel Desc.: Processing Method: \*\*\*\*

— Channel: 2487Channel 2 Channel Desc.: Processing Method: \*\*\*\*

| Peak Name | RT (min) | Area (μV*sec) | % Area | Height (μV) | Amount | Units |
|-----------|----------|---------------|--------|-------------|--------|-------|
| 1 ****    | ****     | ****          | ****   | ****        | ****   | ****  |
| 2 ****    | ****     | ****          | ****   | ****        | ****   | ****  |

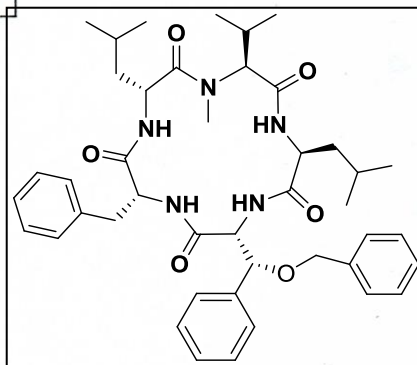

**Compound 43 HPLC Cyclized Pentapeptide β-benzyloxy-Phe-Leu-N-Me-Val-D-Leu-D-Phe**

## Display Report - All Windows Selected Analysis

**Analysis Name:** VJ\_145\_146\_PE **Instrument:** Agilent 6330 Ion Trap **Print Date:** 8/14/2009 3:08:02 PM  
**Method:** SANA.M NT\_DD\_TEST.D **Operator:** sdsu **Acq. Date:** 5/14/2009 2:49:09 PM  
**Sample Name:** VJ\_145\_146\_pent\_DD\_test  
**Analysis Info:**

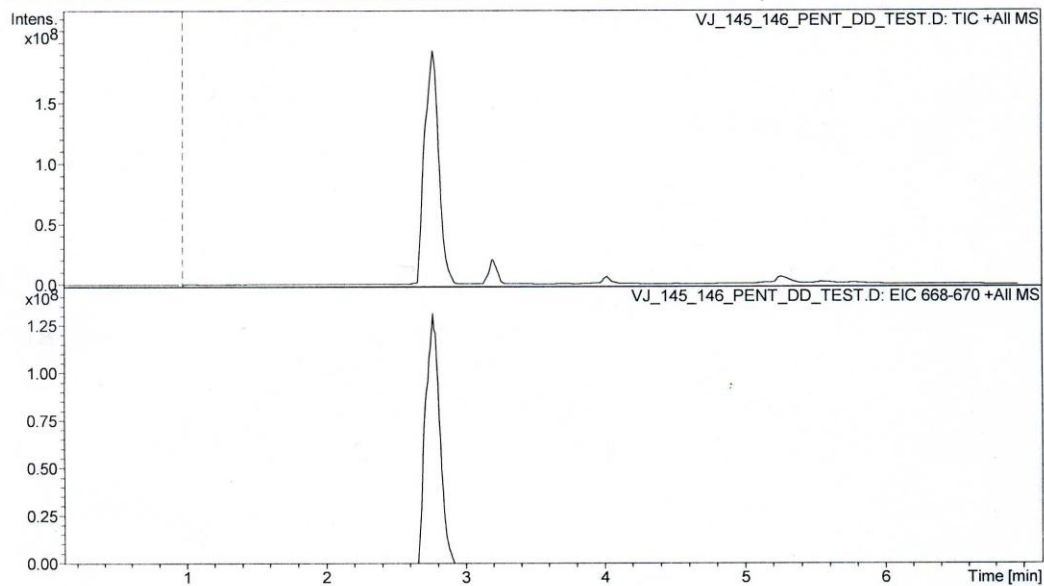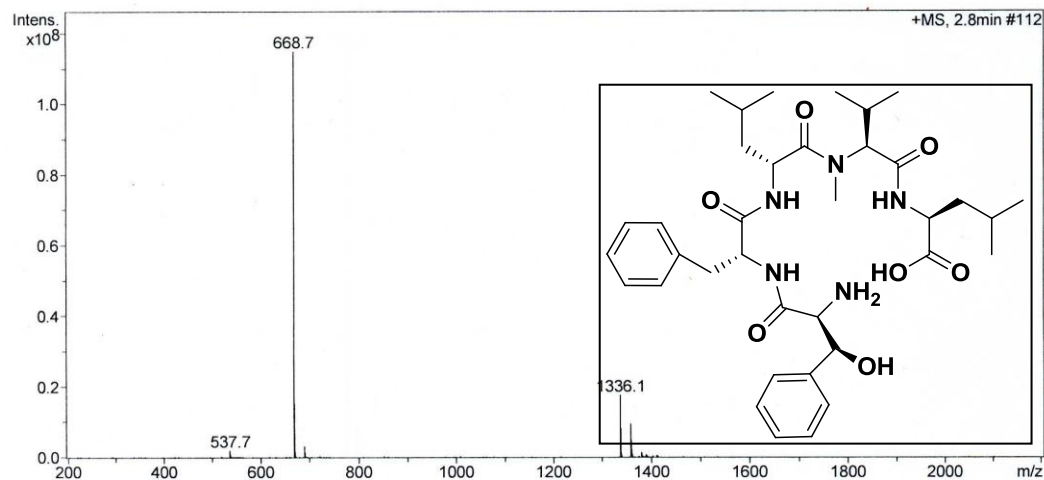

**Compound 44 LCMS Double Deprotected Linear Pentapeptide HO-Leu-N-Me-Val-D-Leu-D-Phe-β-OH-Phe-NH<sub>2</sub> (MW=668)**



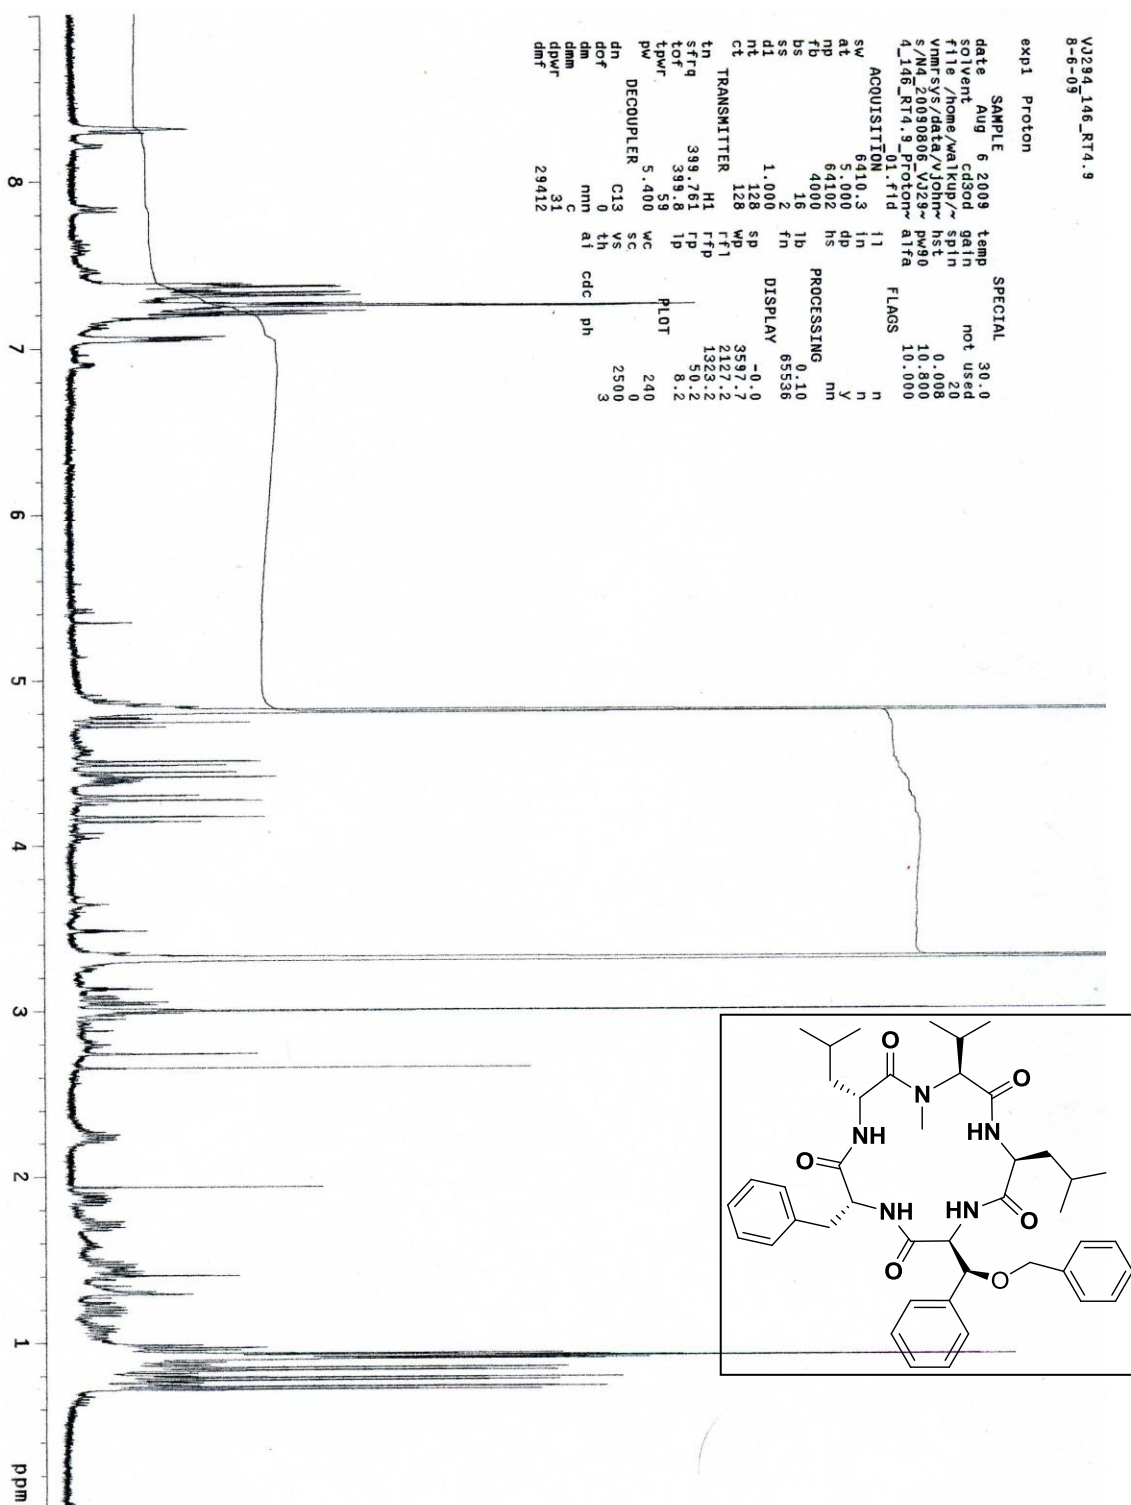Compound 44 NMR Cyclized Pentapeptide  $\beta$ -benzoxy-Phe-Leu-N-Me-Val-D-Leu-D-Phe



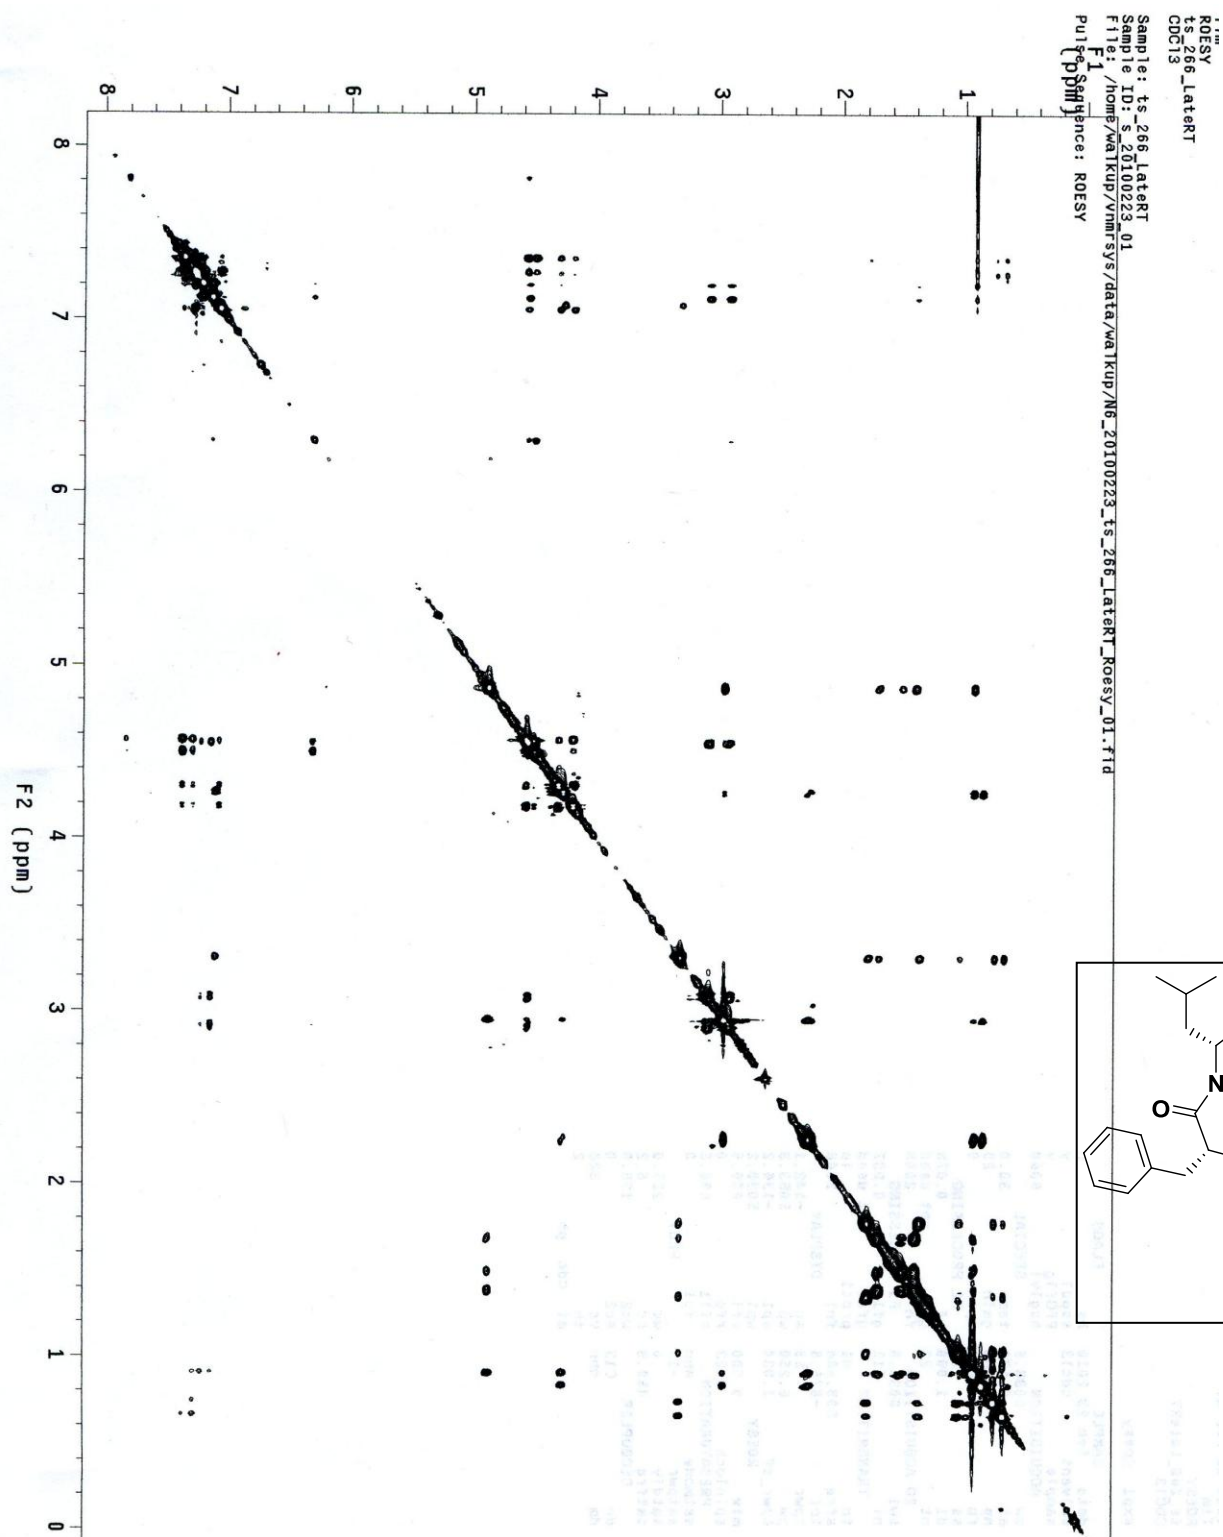Compound 44 ROESY NMR Cyclized Pentapeptide  $\beta$ -benzoxy-Phe-Leu-N-Me-Val-D-Leu-D-Phe

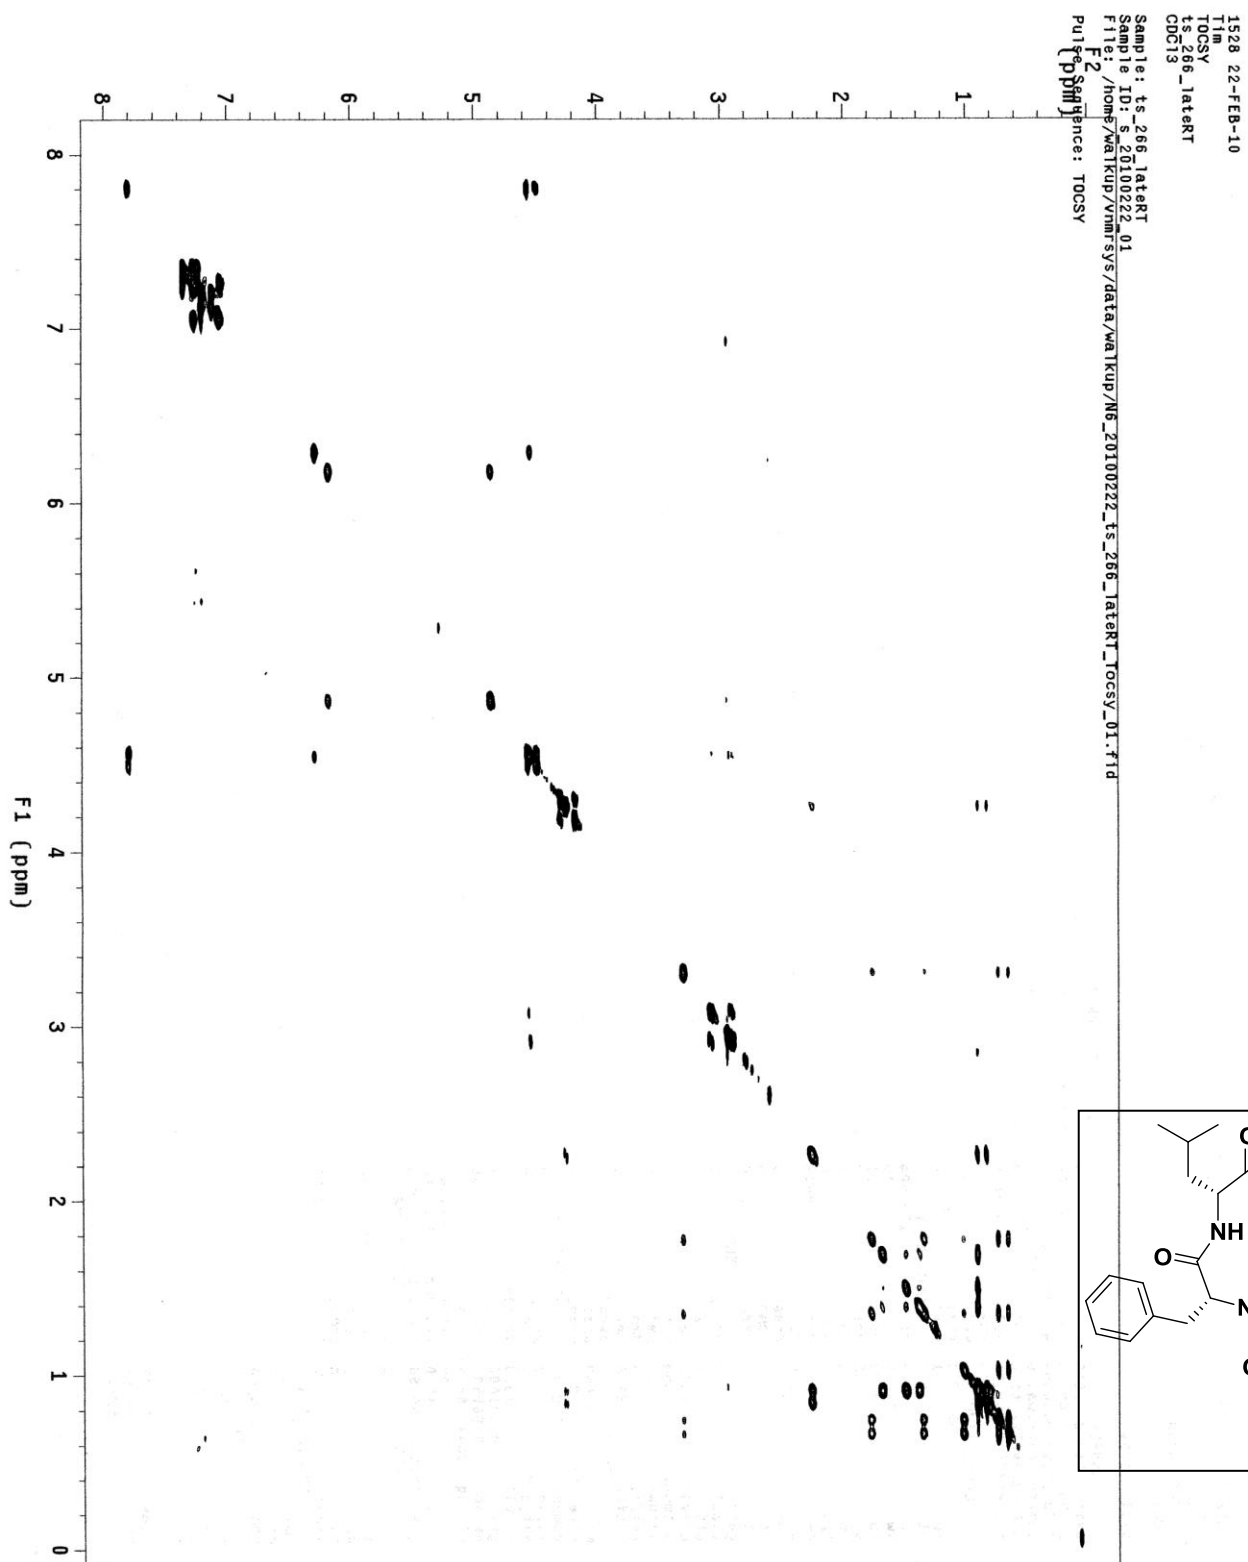Compound 44 TOSCY NMR Cyclized Pentapeptide  $\beta$ -benzoxy-Phe-Leu-N-Me-Val-D-Leu-D-Phe

## Display Report - All Windows Selected Analysis

**Analysis Name:** VJ294\_146\_LATE **Instrument:** Agilent 6330 Ion Trap **Print Date:** 10/14/2009 10:43:12 AM  
**Method:** SANA.M\_RT.D **Operator:** sdsu **Acq. Date:** 8/18/2009 5:09:28 PM  
**Sample Name:** VJ294\_146\_late\_RT  
**Analysis Info:**

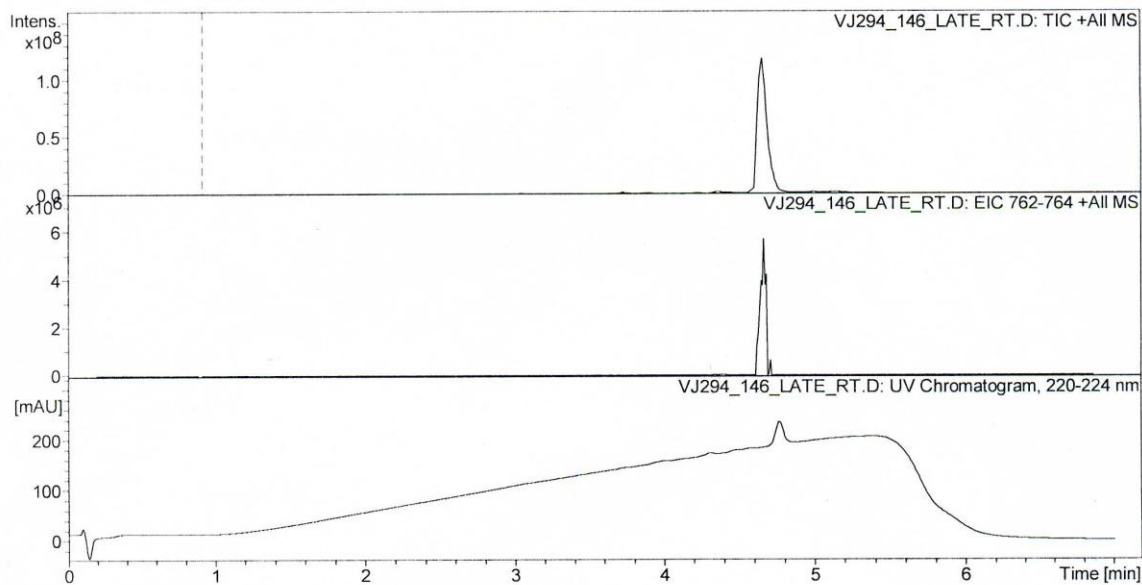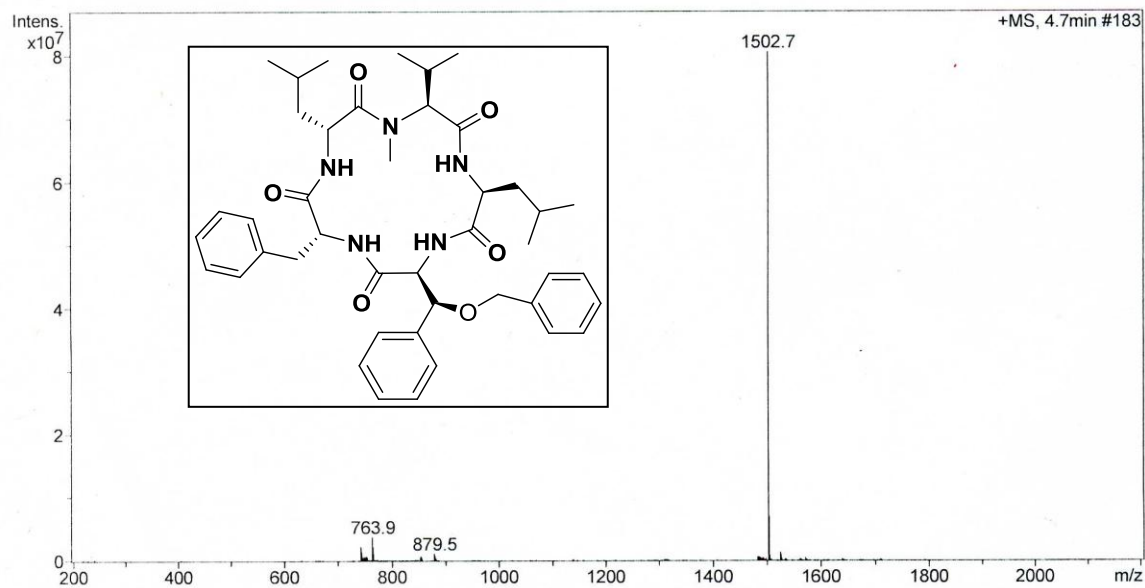

**Compound 44 LCMS Cyclized Pentapeptide  $\beta$ -benzoxy-Phe-Leu-N-Me-Val-D-Leu-D-Phe (MW=740)**

SDSU

Project Name: Defaults

Reported by User: System

Breeze

## SAMPLE INFORMATION

Sample Name: VJ\_146\_late\_RT

Acquired By: System

Sample Type: Unknown

Sample Set Name:

Vial: 1

Acq. Method: primary\_sanA\_ss\_ACN

Injection #: 37

Date Acquired: 8/18/2009 5:31:33 PM

Run Time: 16.00 Minutes

Injection Volume: 50.00 ul

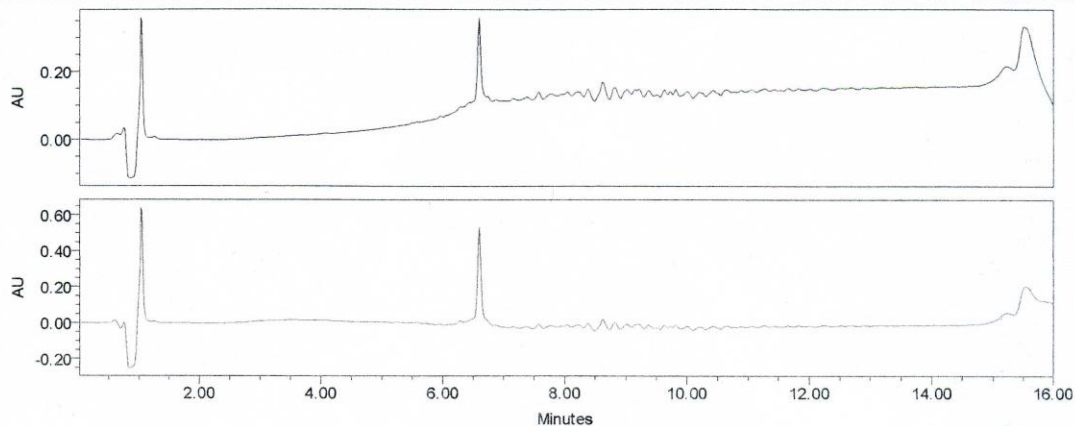

| Peak Name | RT (min) | Area (μV*sec) | % Area | Height (μV) | Amount | Units |
|-----------|----------|---------------|--------|-------------|--------|-------|
| 1 ****    | ****     | ****          | ****   | ****        | ****   | ****  |
| 2 ****    | ****     | ****          | ****   | ****        | ****   | ****  |

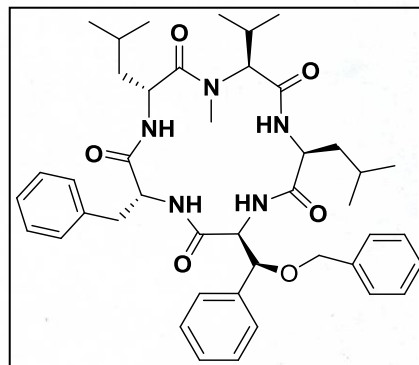Compound 44 HPLC Cyclized Pentapeptide  $\beta$ -benzoxy-Phe-Leu-N-Me-Val-D-Leu-D-Phe

## Display Report - All Windows Selected Analysis

Analysis Name: CCL\_147\_148\_L Instrument: Agilent 6330 Ion Trap Print Date: 8/17/2009 11:10:14 AM  
Method: SANA.M P.D Operator: sdsu Acq. Date: 6/23/2009 11:58:06 PM  
Sample Name: CCL\_147\_148\_LP  
Analysis Info:

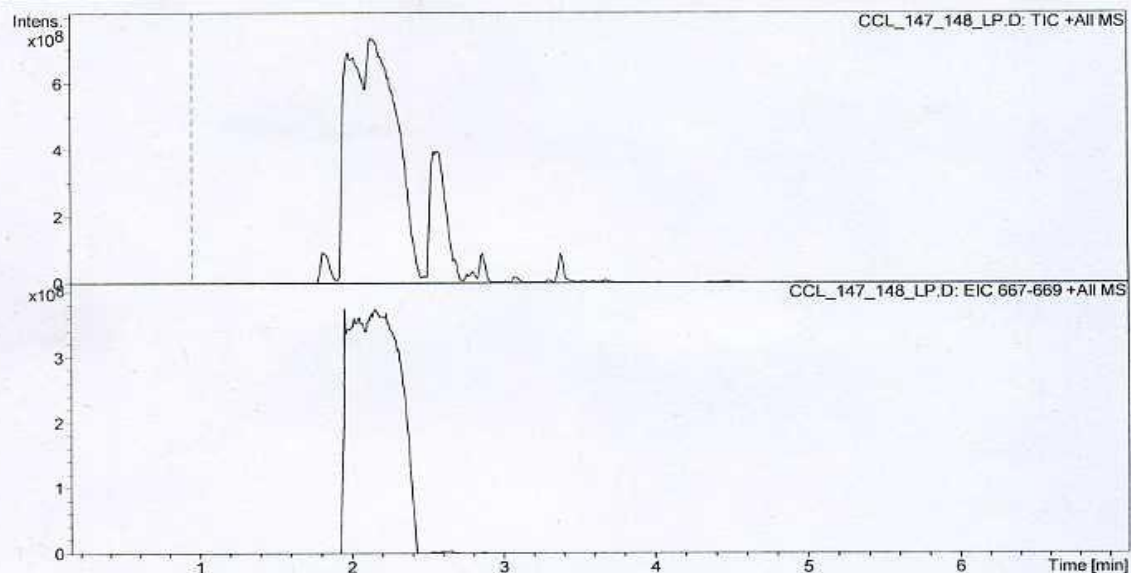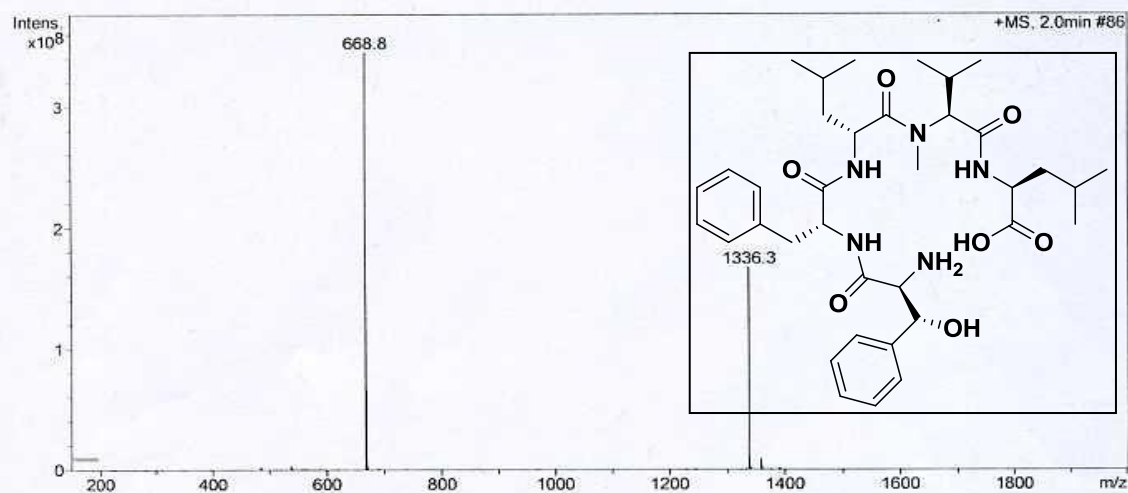

Compound 45 LCMS Double Deprotected Linear Pentapeptide HO-Leu-N-Me-Val-D-Leu-D-Phe-β-OH-D-Phe-NH<sub>2</sub> (MW=668)

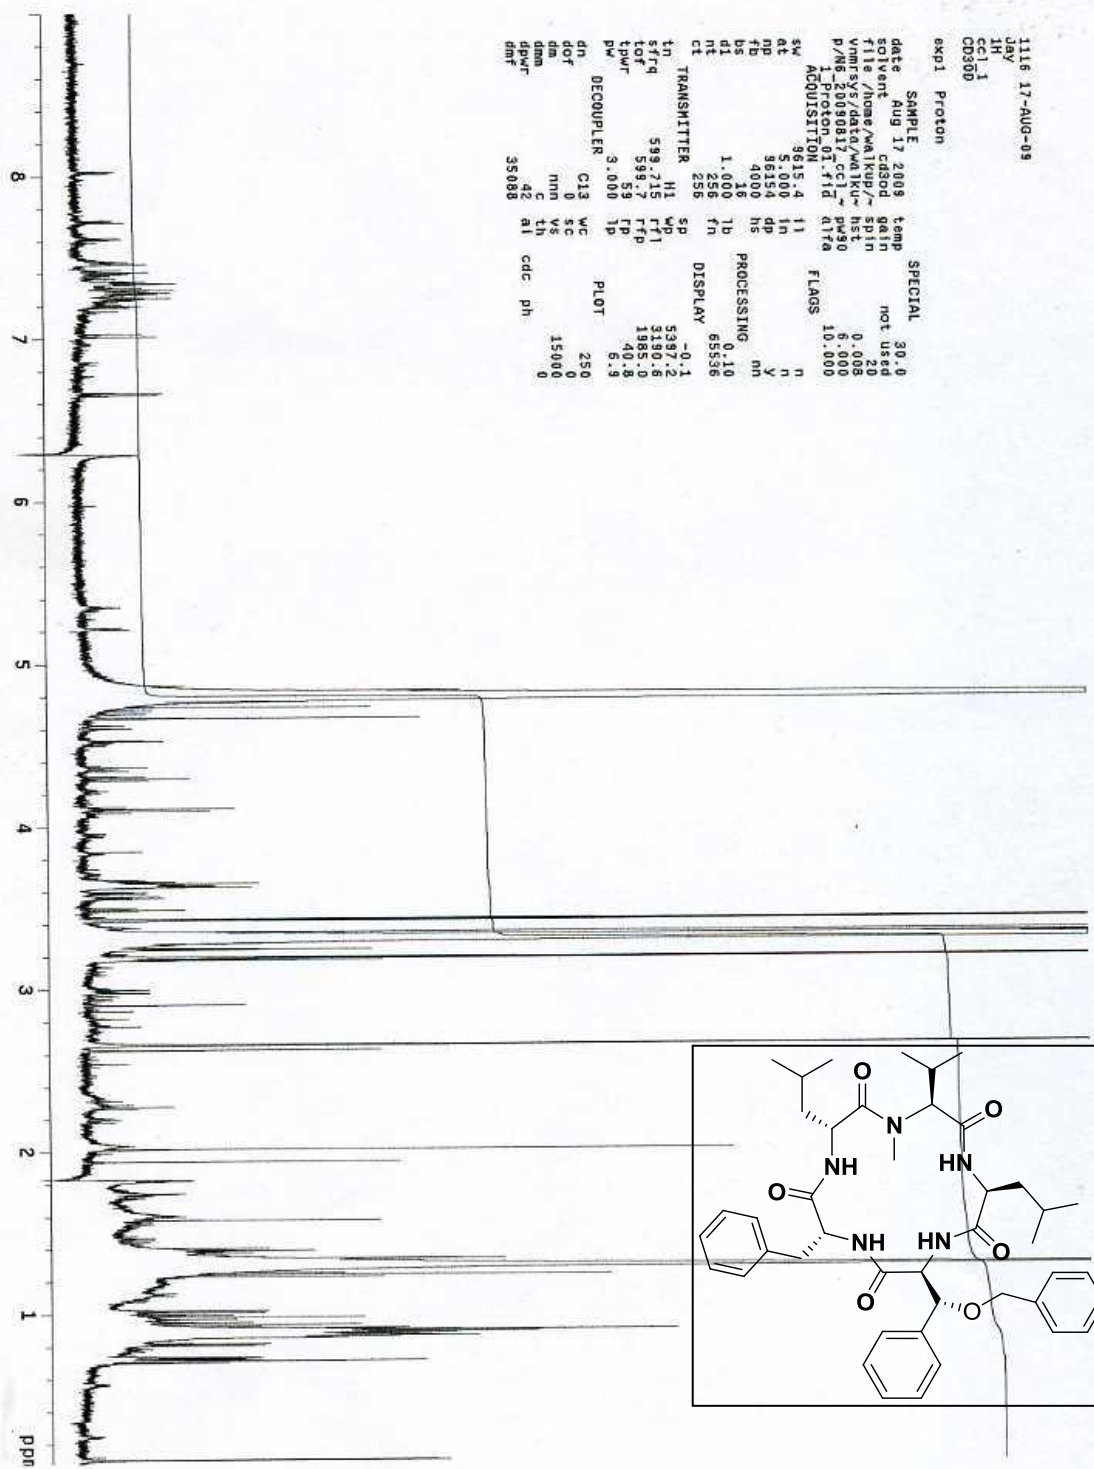Compound 45 NMR Cyclized Pentapeptide  $\beta$ -benzoxy-Phe-Leu-N-Me-Val-D-Leu-D-Phe



## Display Report - All Windows Selected Analysis

**Analysis Name:** CCL136\_CYC147 **Instrument:** Agilent 6330 Ion Trap **Print Date:** 8/15/2009 8:16:24 PM  
**Method:** SANA.M\_148\_EARILER\_ **Operator:** sdsu **Acq. Date:** 8/15/2009 7:40:18 PM  
**Sample Name:** CCL136\_cyc147\_148\_eariler\_01  
**Analysis Info:**

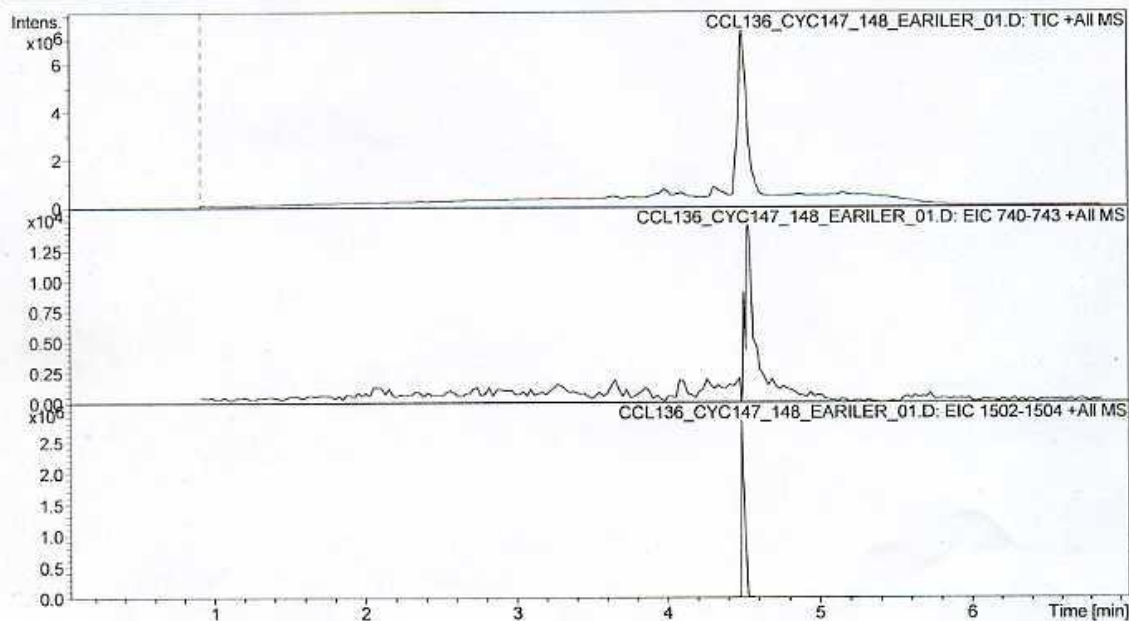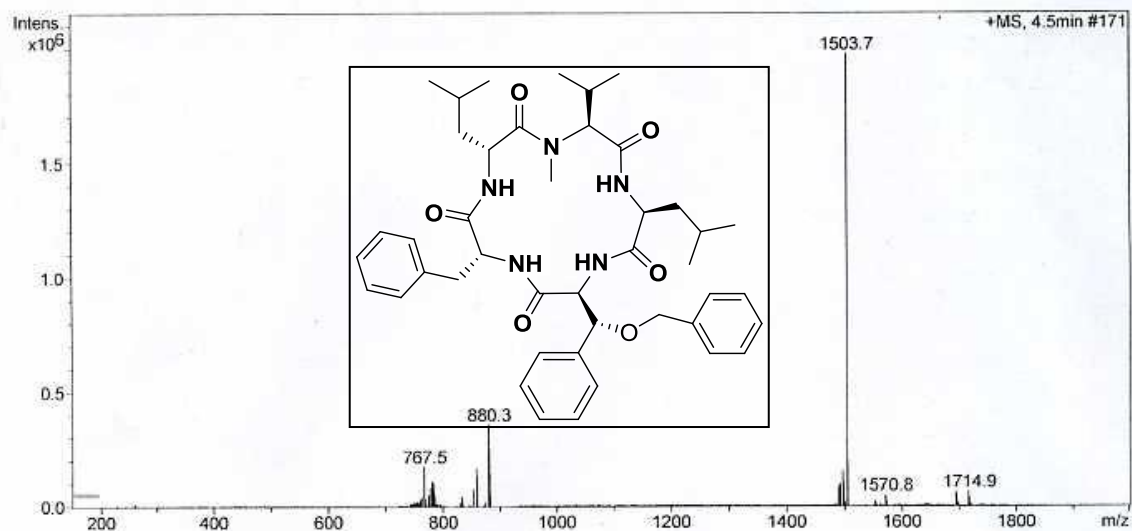

**Compound 45 LCMS Cyclized Pentapeptide  $\beta$ -benzoxy-Phe-Leu-N-Me-Val-D-Leu-D-Phe (MW=740)**

SDSU

Project Name: Defaults  
Reported by User: System

Breeze

## SAMPLE INFORMATION

|              |                              |                   |                      |
|--------------|------------------------------|-------------------|----------------------|
| Sample Name: | CCL136_cyc147_148_earlier_03 | Acquired By:      | System               |
| Sample Type: | Unknown                      | Sample Set Name:  |                      |
| Vial:        | 1                            | Acq. Method:      | primary_sanA_ss_ACN  |
| Injection #: | 22                           | Date Acquired:    | 8/16/2009 5:58:09 PM |
| Run Time:    | 16.00 Minutes                | Injection Volume: | 50.00 ul             |

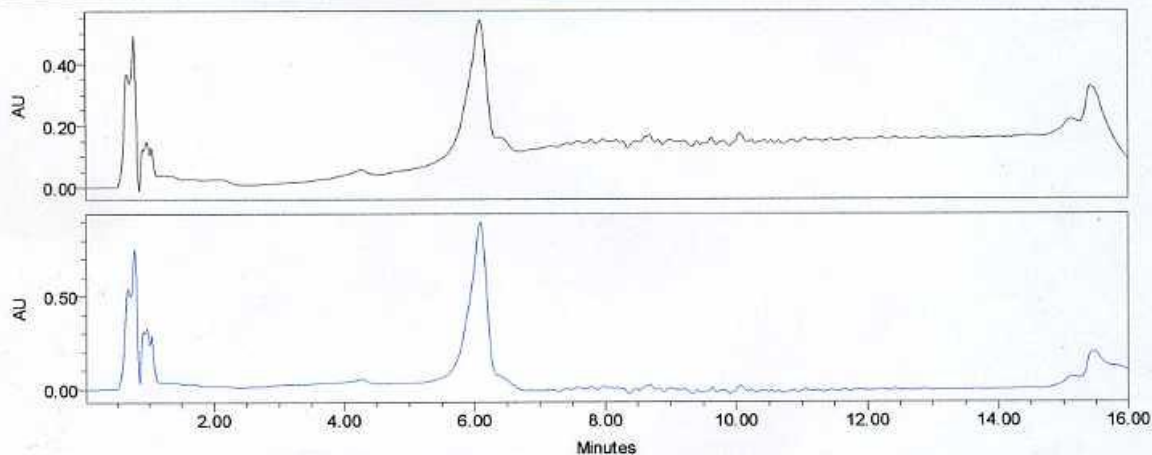

— Channel: 2487Channel 1 Channel Desc.: Processing Method: \*\*\*\*  
 — Channel: 2487Channel 2 Channel Desc.: Processing Method: \*\*\*\*

| Peak Name | RT (min) | Area ( $\mu\text{V}\cdot\text{sec}$ ) | % Area | Height ( $\mu\text{V}$ ) | Amount | Units |
|-----------|----------|---------------------------------------|--------|--------------------------|--------|-------|
| 1         | ****     | ****                                  | ****   | ****                     | ****   | ****  |
| 2         | ****     | ****                                  | ****   | ****                     | ****   | ****  |

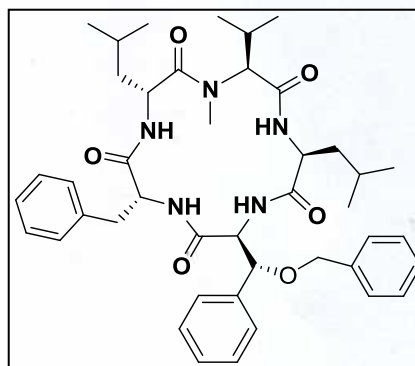



## Display Report - All Windows Selected Analysis

Analysis Name: CCL\_147\_148\_L Instrument: Agilent 6330 Ion Trap Print Date: 8/17/2009 11:10:39 AM  
Method: SANA.M P.D Operator: sdsu Acq. Date: 6/23/2009 11:58:06 PM  
Sample Name: CCL\_147\_148\_LP  
Analysis Info:

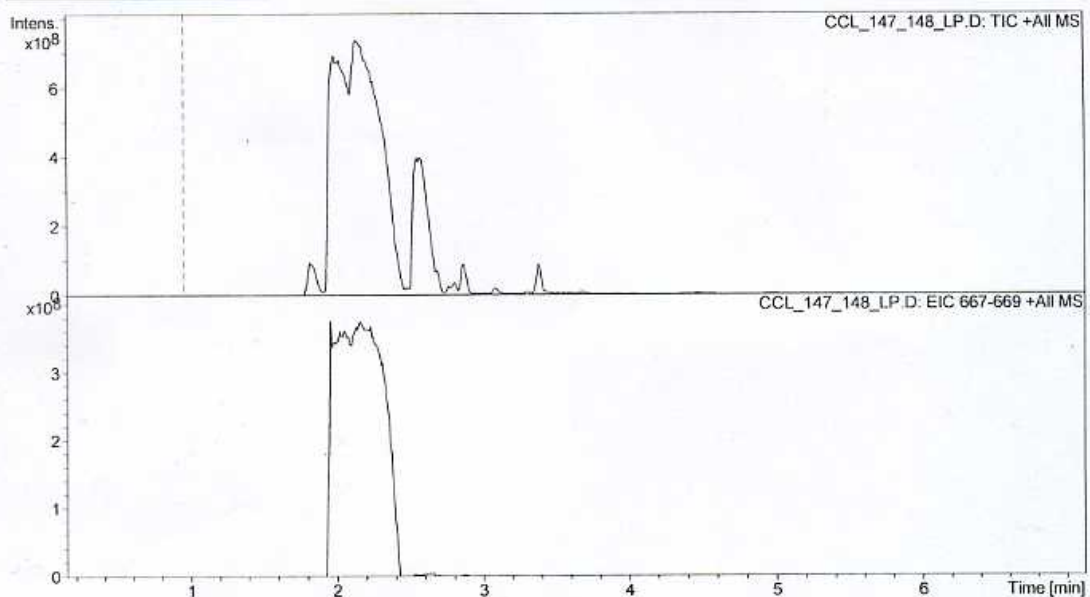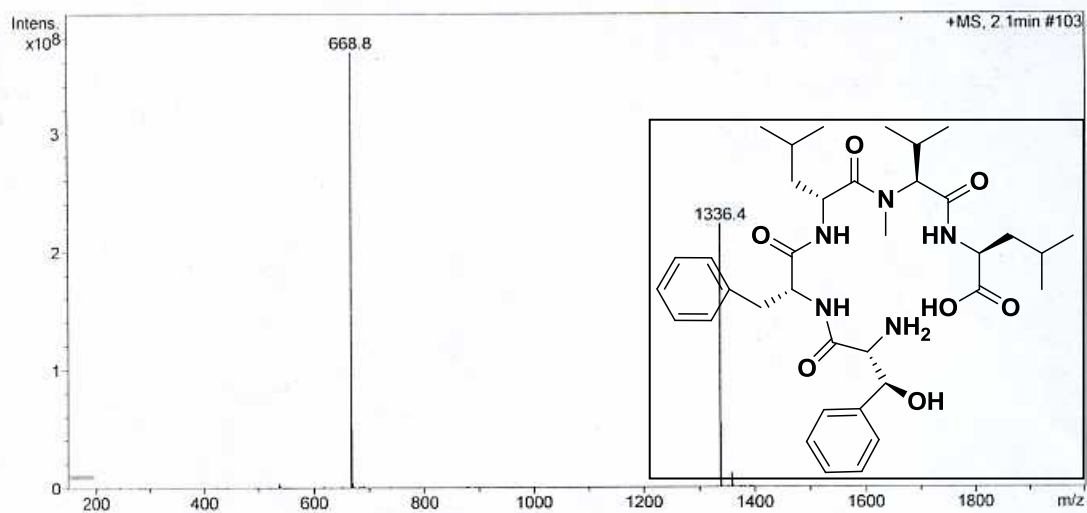

**Compound 46 LCMS Double Deprotected Linear Pentapeptide HO-Leu-N-Me-Val-D-Leu-D-Phe-β-OH-Phe-NH<sub>2</sub> (MW=668)**

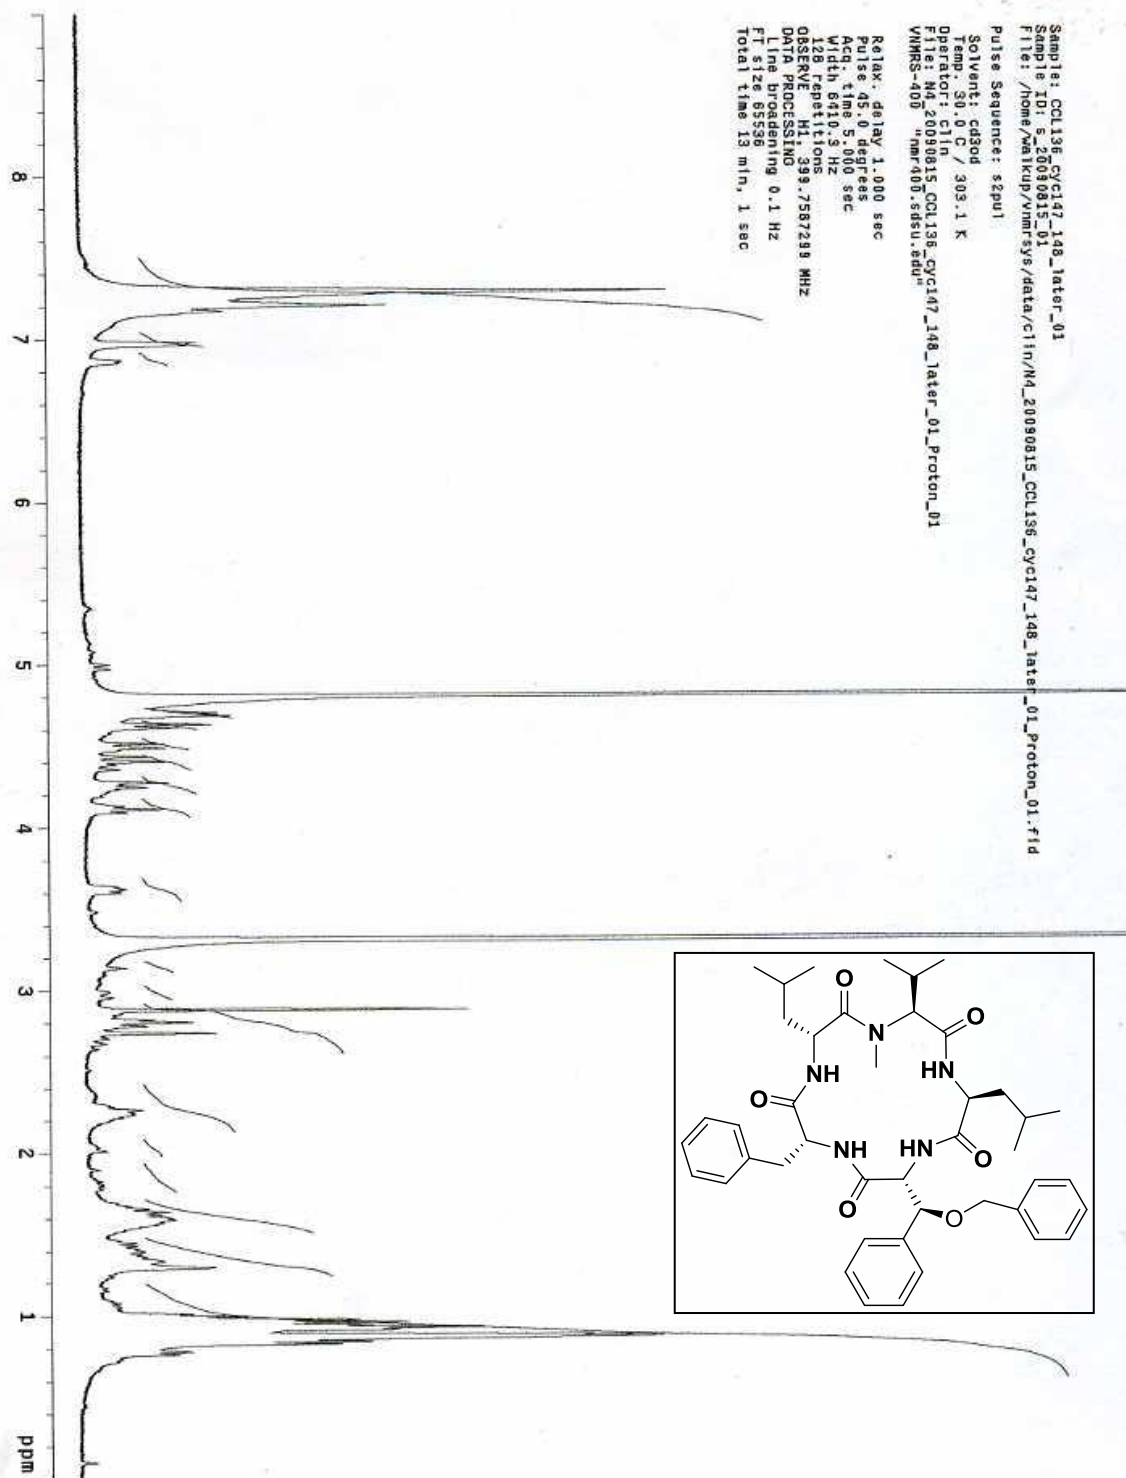

Compound 46 NMR Cyclized Pentapeptide  $\beta$ -benzoxy-Phe-Leu-N-Me-Val-D-Leu-D-Phe

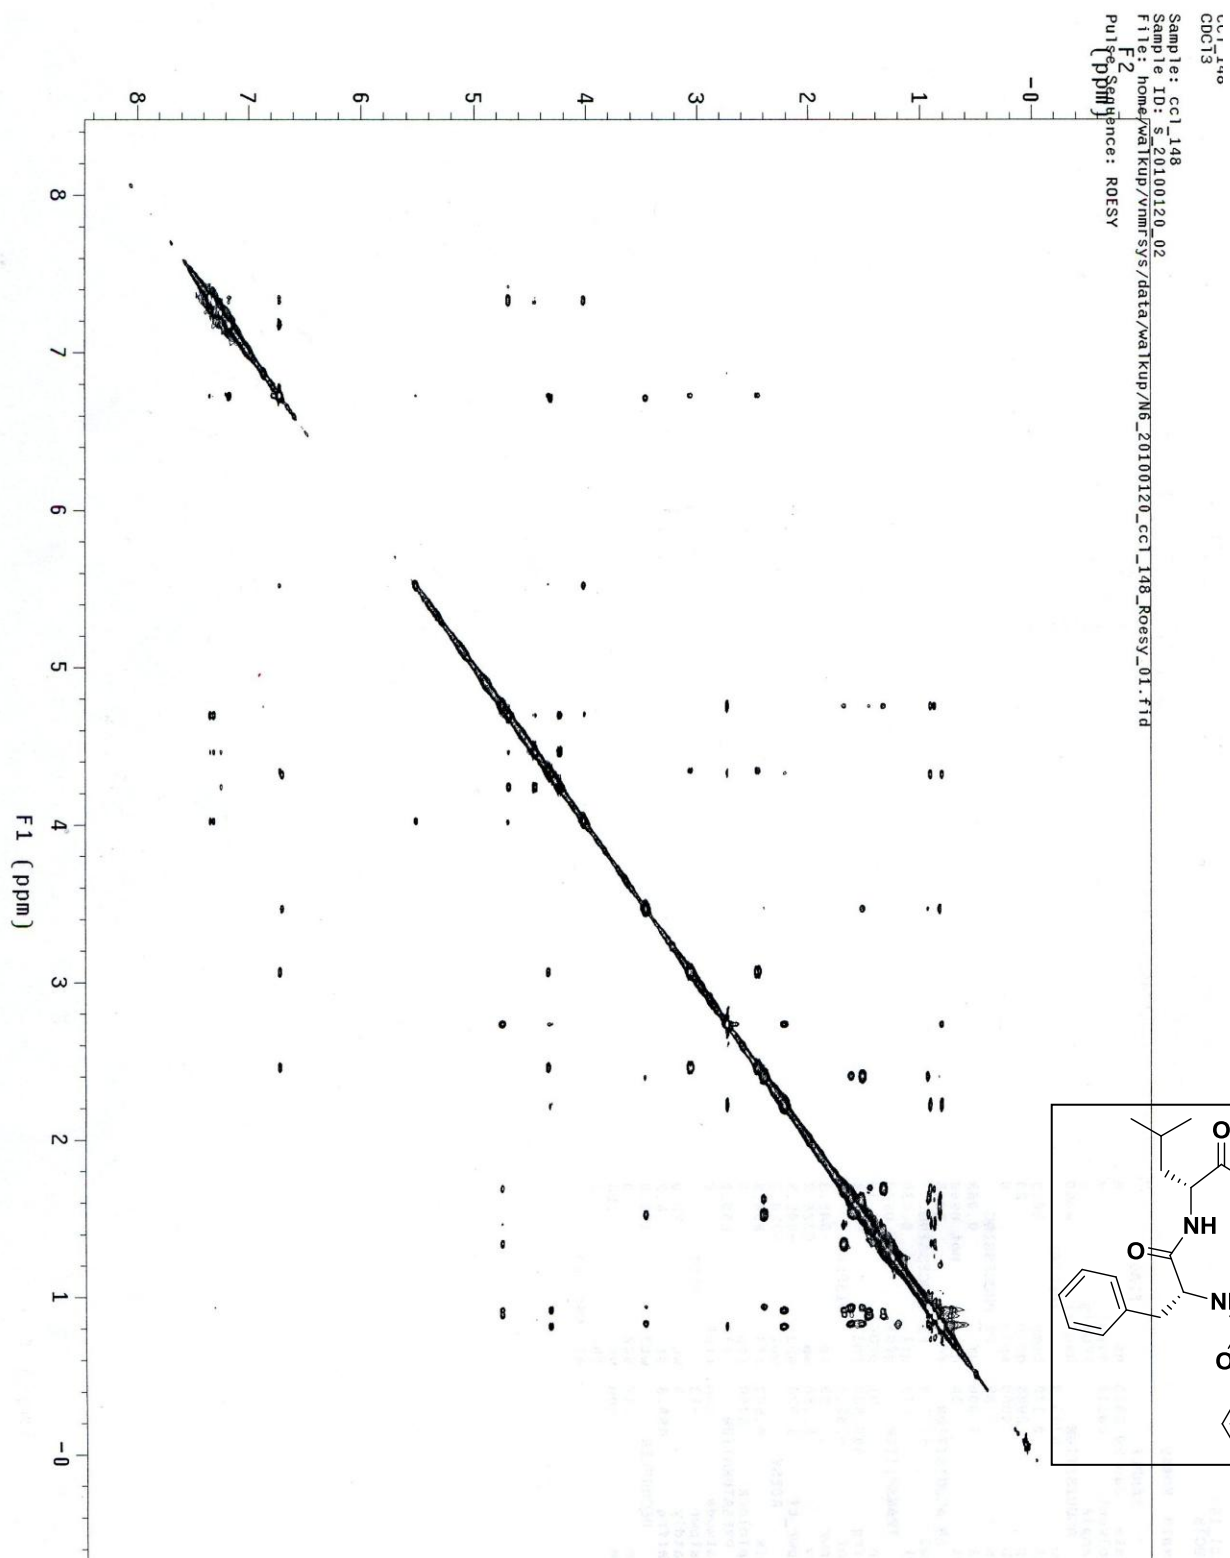Compound 46 ROSEY NMR Cyclized Pentapeptide  $\beta$ -benzoxy-Phe-Leu-N-Me-Val-D-Leu-D-Phe

1318 04-MAR-10  
131Y  
TOSCY  
ccl\_tate\_RT  
CDCl3  
Sample: ccl\_tate\_RT  
Sample ID: S\_20100304\_01  
File: /home/waikup/vnmrsvs/data/waikup/N6\_20100304\_ccl\_tate\_RT\_toscy\_01.fid  
F2  
Pulse Sequence: TOSCY  
[ppm]

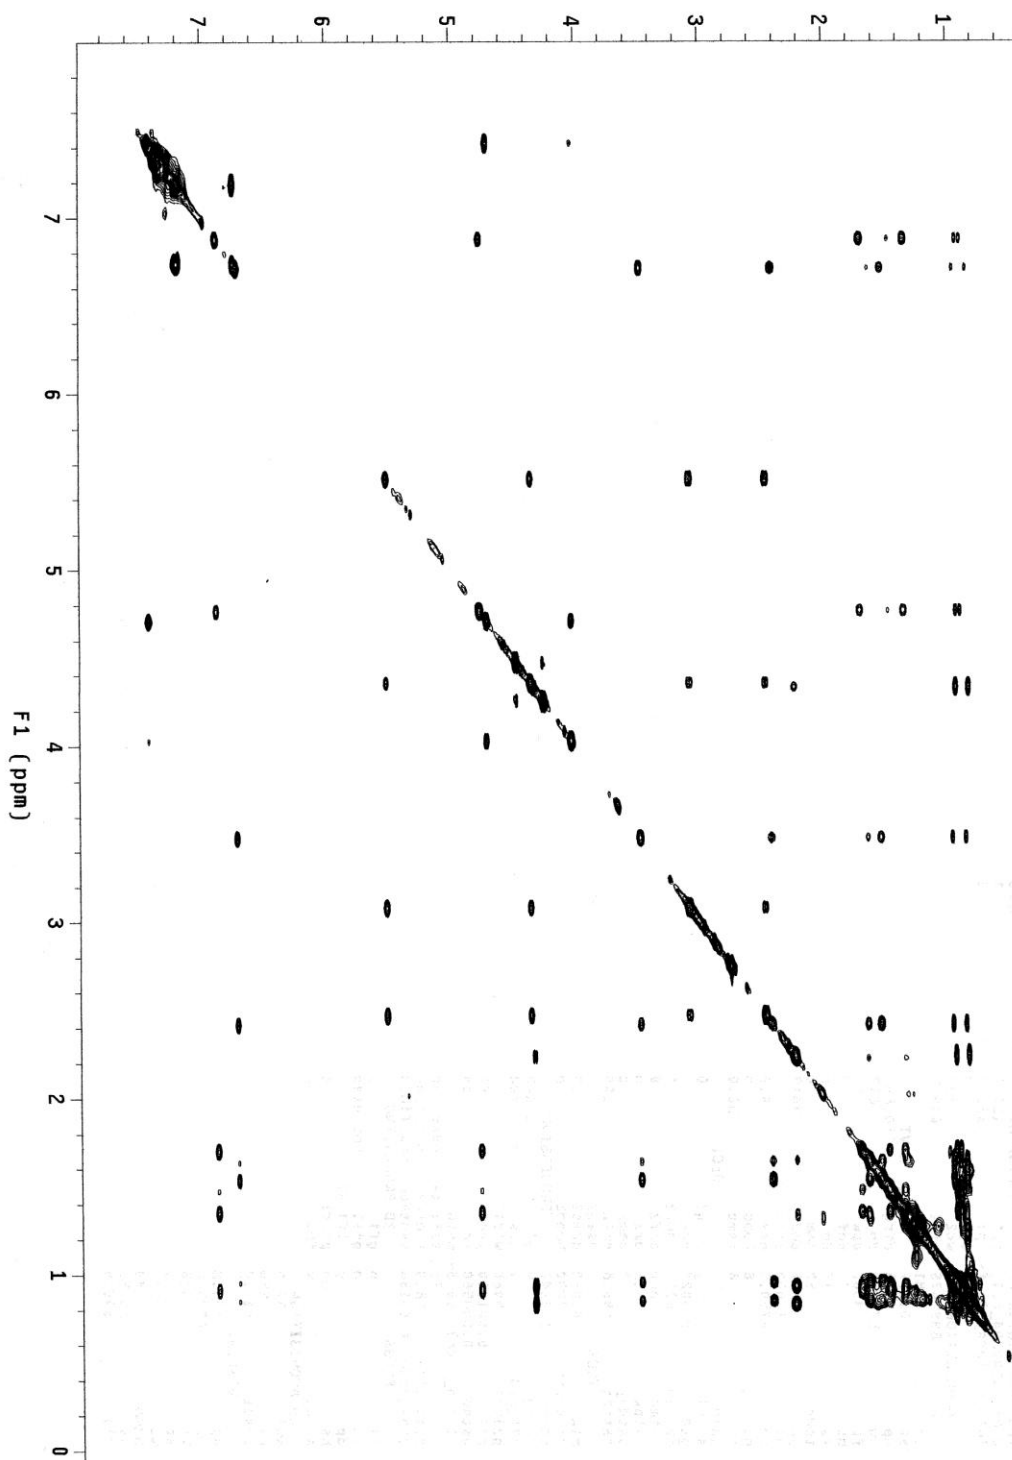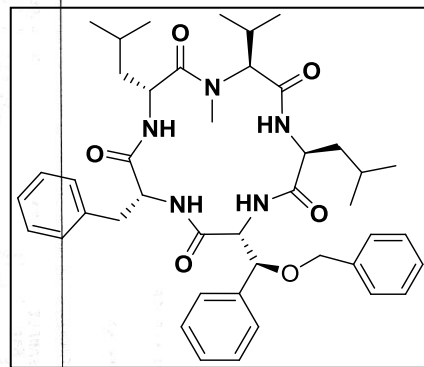

Compound 46 TOSCY NMR Cyclized Pentapeptide  $\beta$ -benzoxy-Phe-Leu-N-Me-Val-D-Leu-D-Phe

## Display Report - All Windows Selected Analysis

**Analysis Name:** CCL136\_CYC147 **Instrument:** Agilent 6330 Ion Trap **Print Date:** 8/15/2009 9:30:37 PM  
**Method:** SANA.M\_148\_LATER\_04 **Operator:** sdsu **Acq. Date:** 8/15/2009 9:22:08 PM  
**Sample Name:** CCL136\_cyc147\_148\_later\_04  
**Analysis Info:**

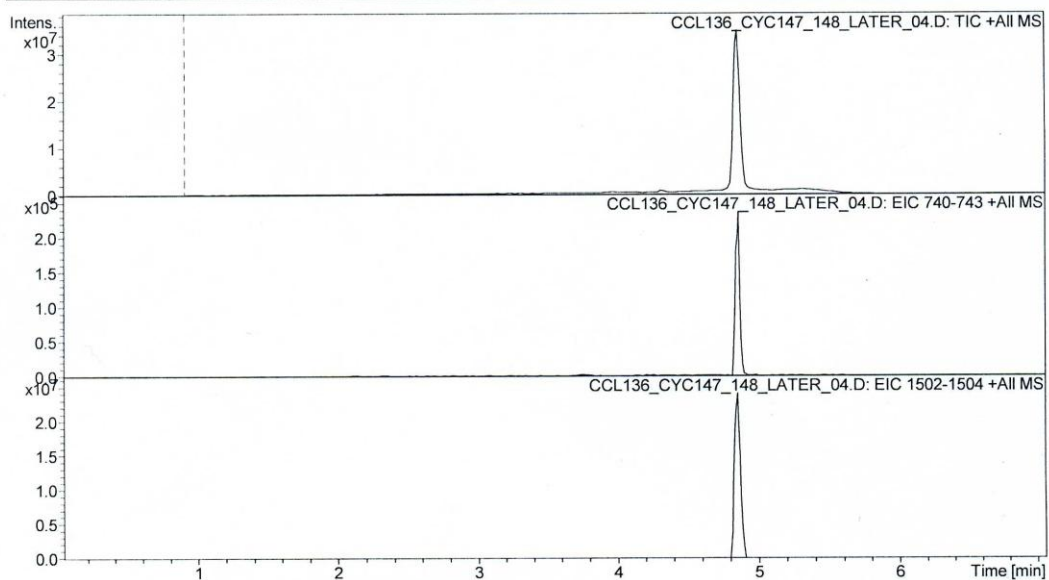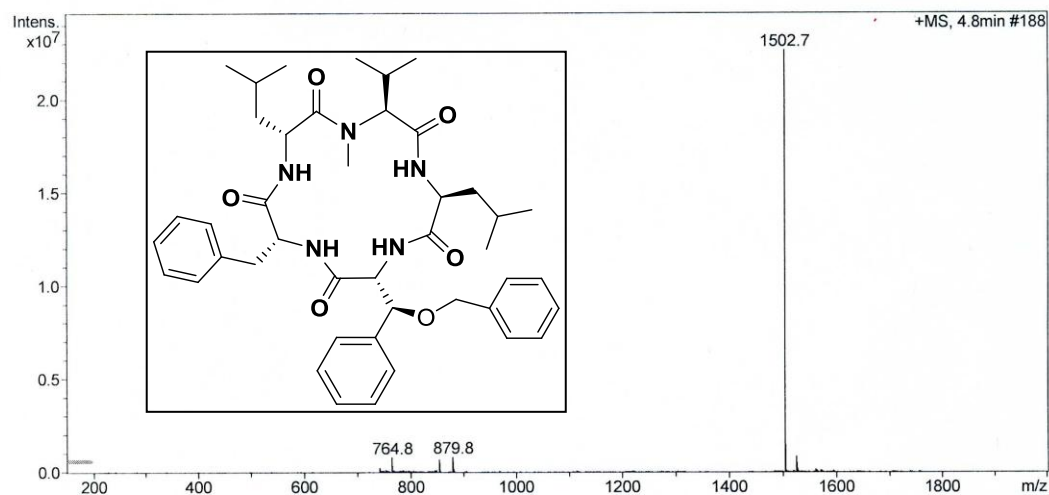

**Compound 46 LCMS Cyclized Pentapeptide  $\beta$ -benzoxy-Phe-Leu-N-Me-Val-D-Leu-D-Phe (MW=740)**

## SDSU

Project Name: Defaults  
Reported by User: System

Breeze

## SAMPLE INFORMATION

|              |                      |                   |                      |
|--------------|----------------------|-------------------|----------------------|
| Sample Name: | CCL_cyc147_148_later | Acquired By:      | System               |
| Sample Type: | Unknown              | Sample Set Name:  |                      |
| Vial:        | 1                    | Acq. Method:      | primary_sanA_ss_ACN  |
| Injection #: | 7                    | Date Acquired:    | 8/15/2009 2:59:51 PM |
| Run Time:    | 16.00 Minutes        | Injection Volume: | 40.00 ul             |

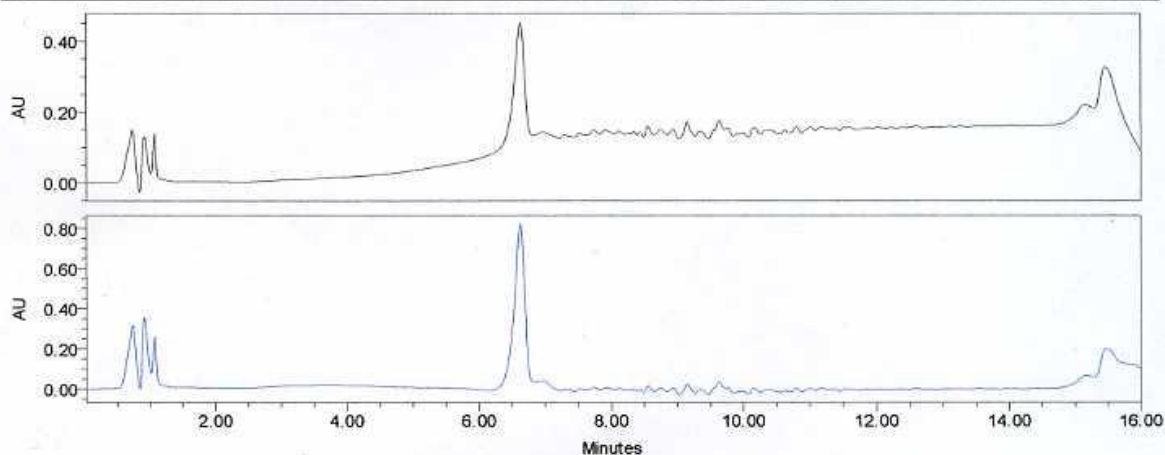

— Channel: 2487Channel 1 Channel Desc.: Processing Method: \*\*\*\*  
— Channel: 2487Channel 2 Channel Desc.: Processing Method: \*\*\*\*

| Peak Name | RT (min) | Area ( $\mu\text{V}\cdot\text{sec}$ ) | % Area | Height ( $\mu\text{V}$ ) | Amount | Units |
|-----------|----------|---------------------------------------|--------|--------------------------|--------|-------|
| 1         | ****     | ****                                  | ****   | ****                     | ****   | ****  |
| 2         | ****     | ****                                  | ****   | ****                     | ****   | ****  |

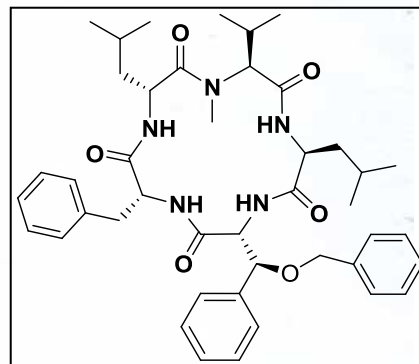

Supplement: NIHMS225641-supplement-01.pdf [file NIHMS225641-supplement-01.pdf]
